# Supplementary material for: Searching for Drug Synergy in Complex Dose–Response Landscapes Using an Interaction Potency Model
Source: PubMed Central journal article supplement (PMC4759128; doi:10.1016/j.csbj.2015.09.001), 2015-09-25

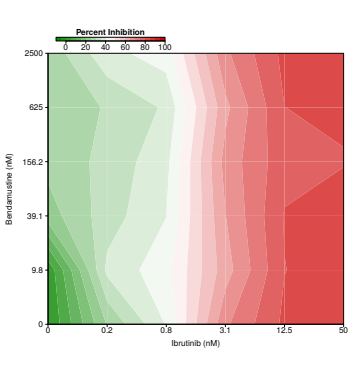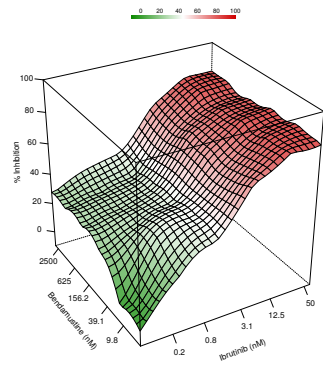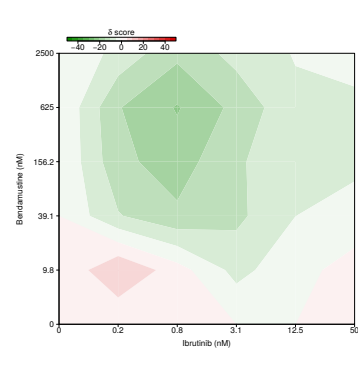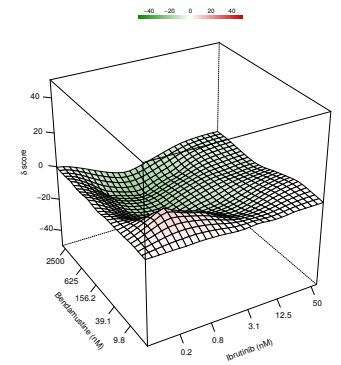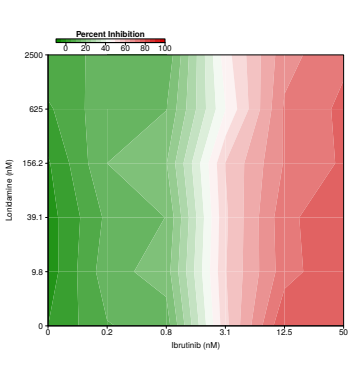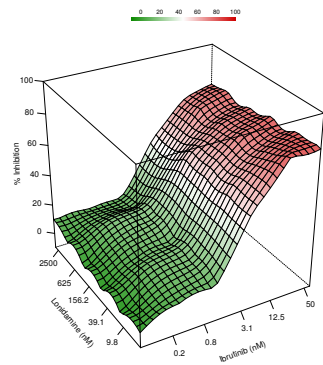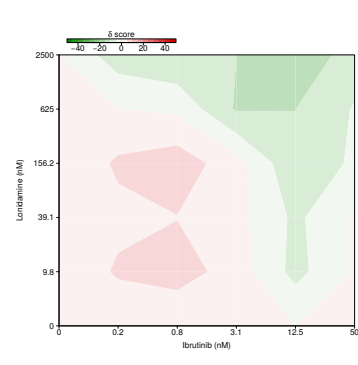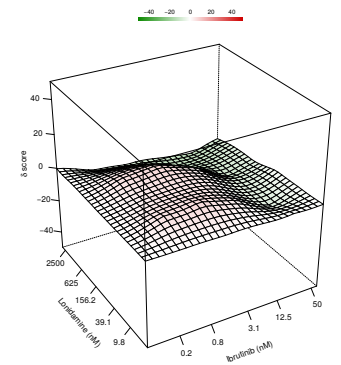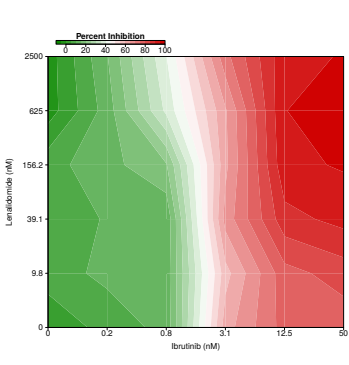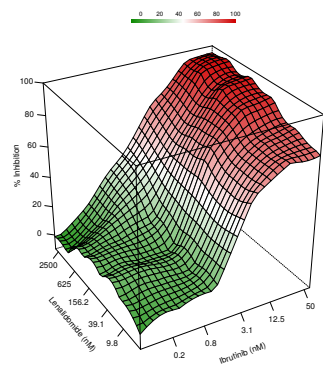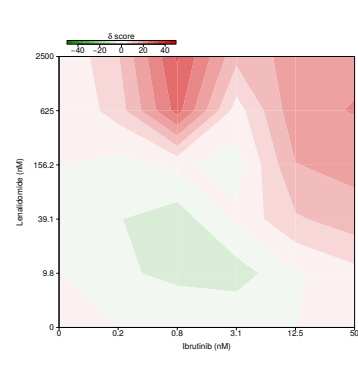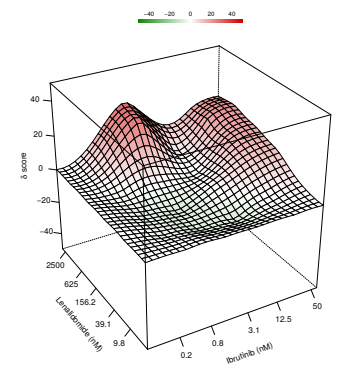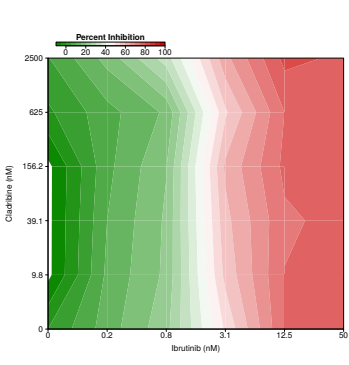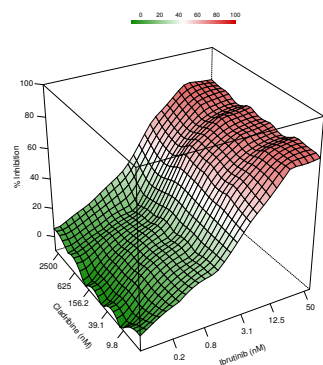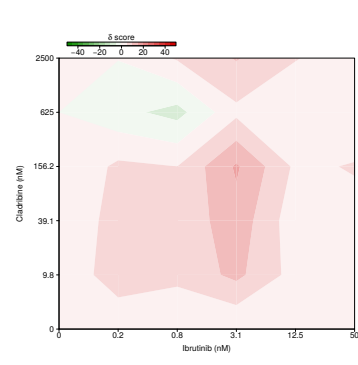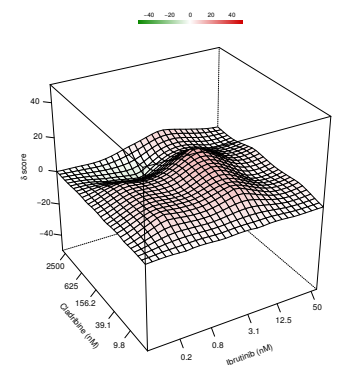

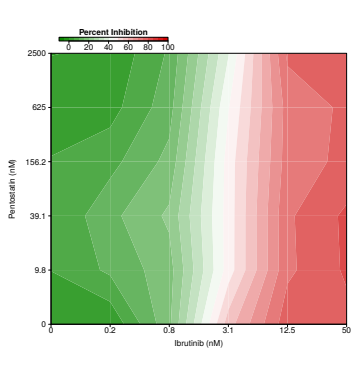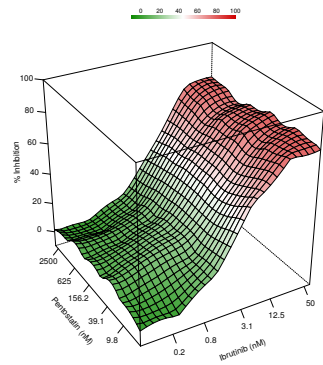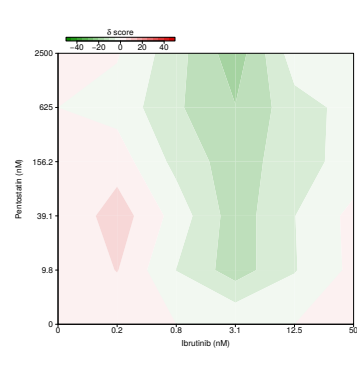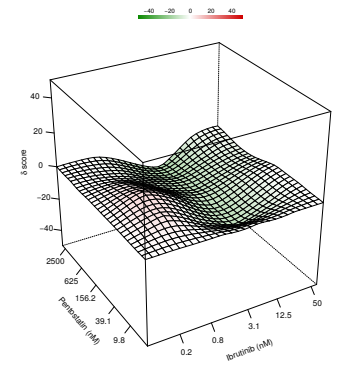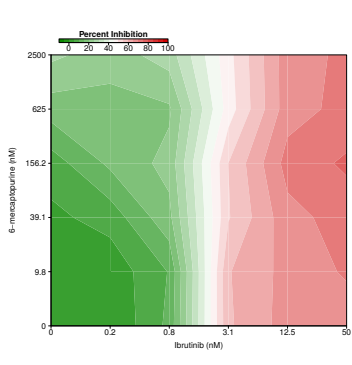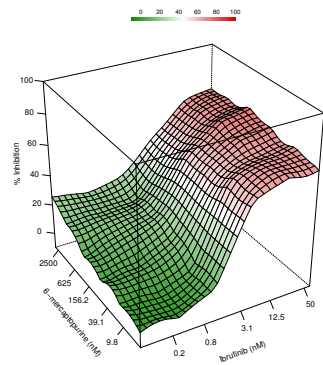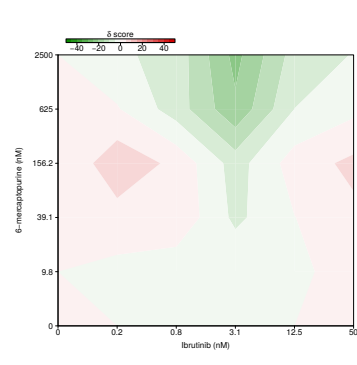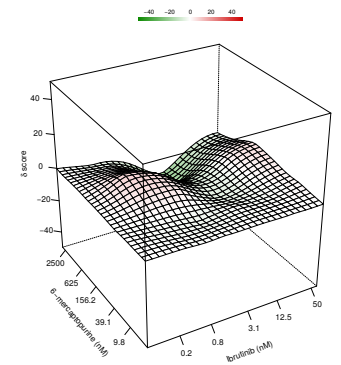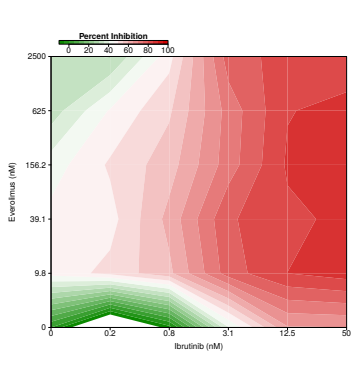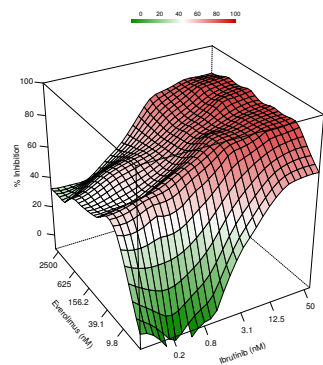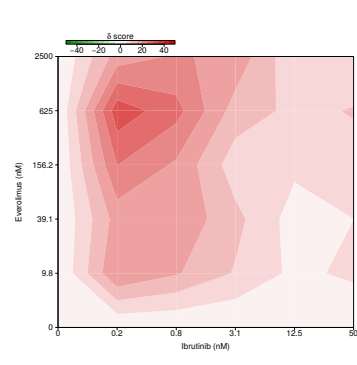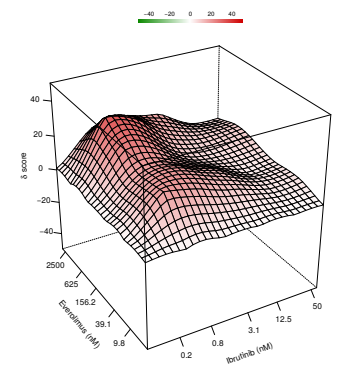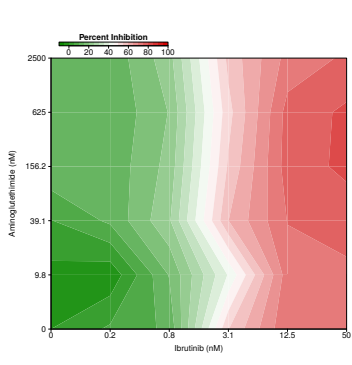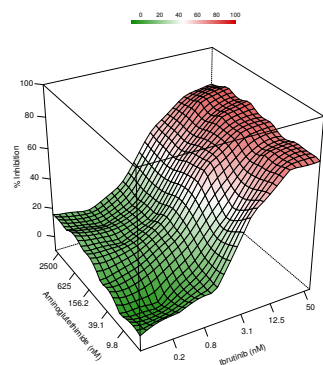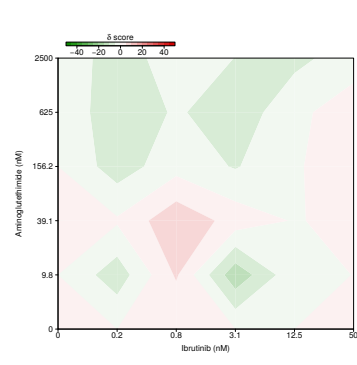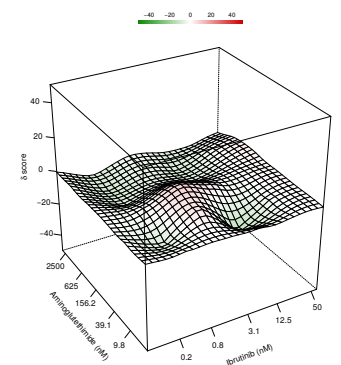

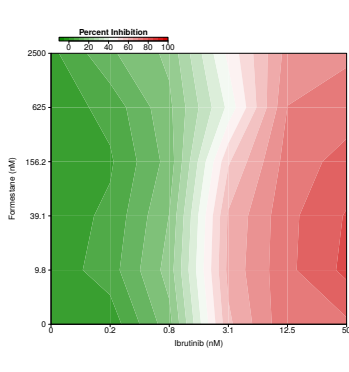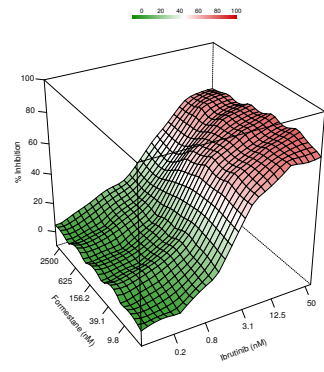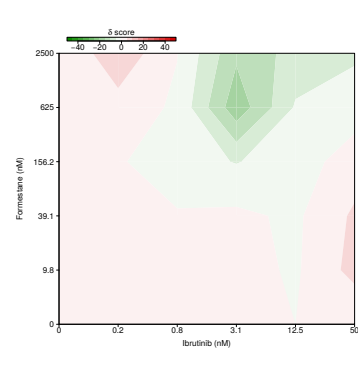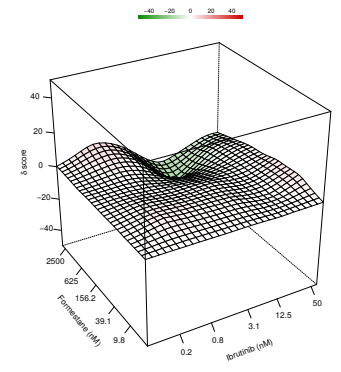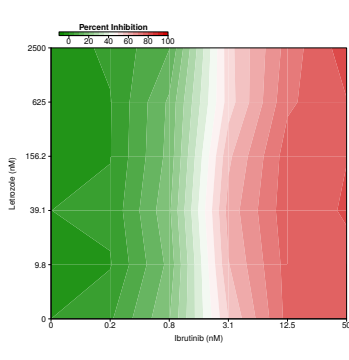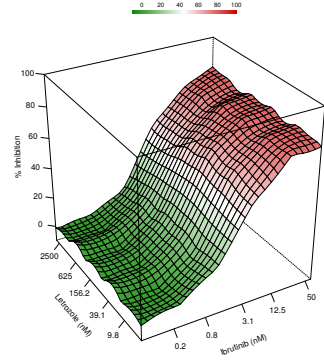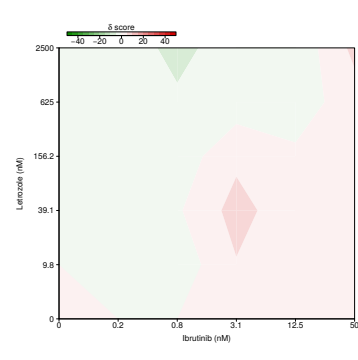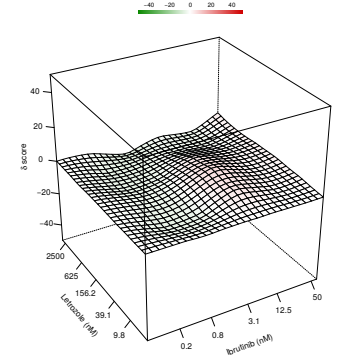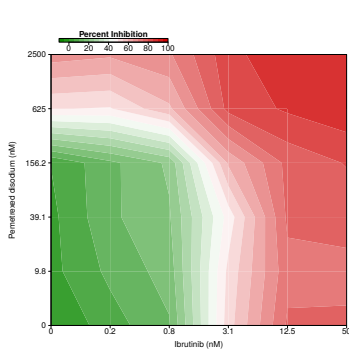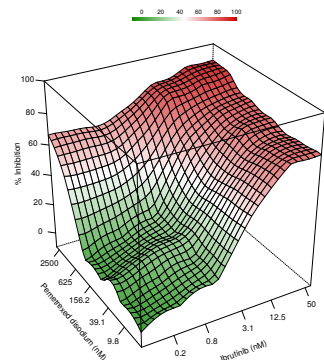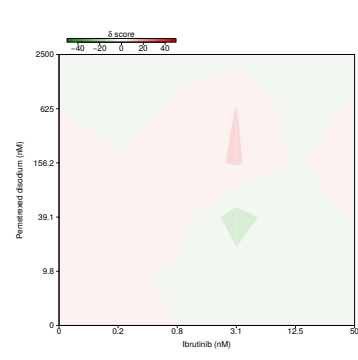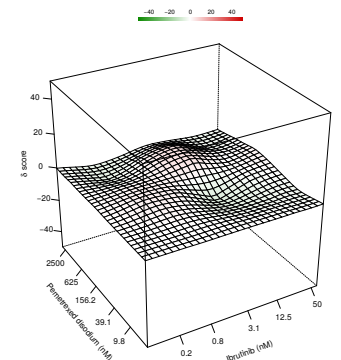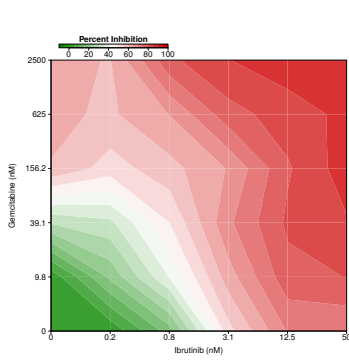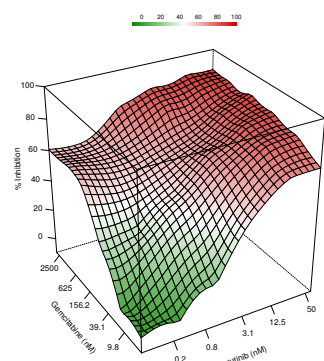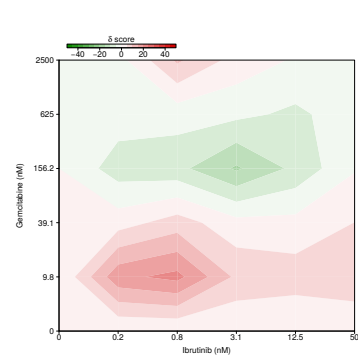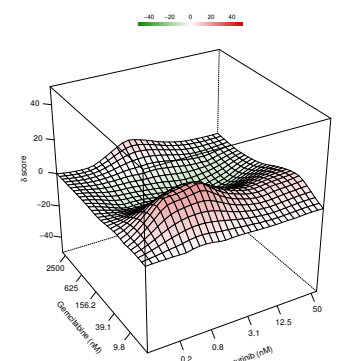

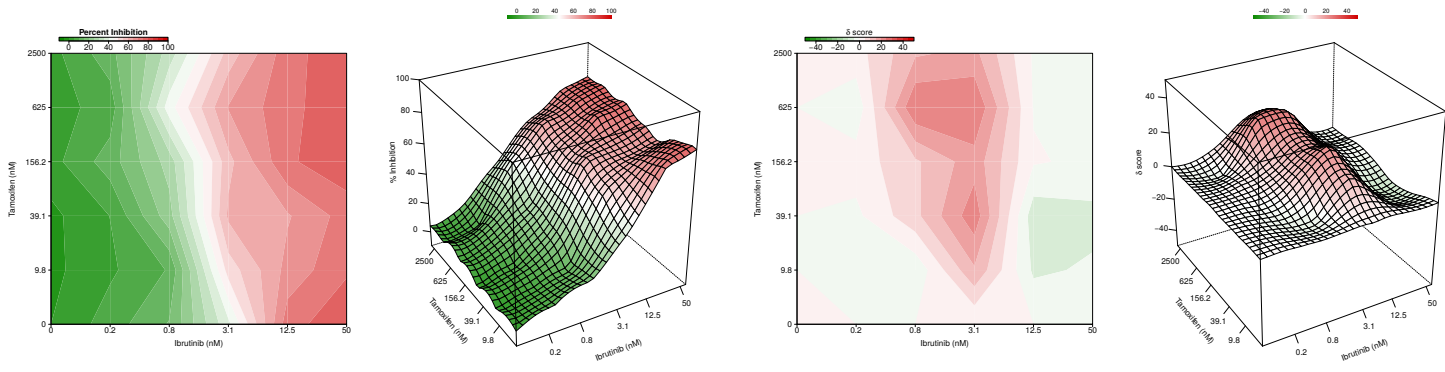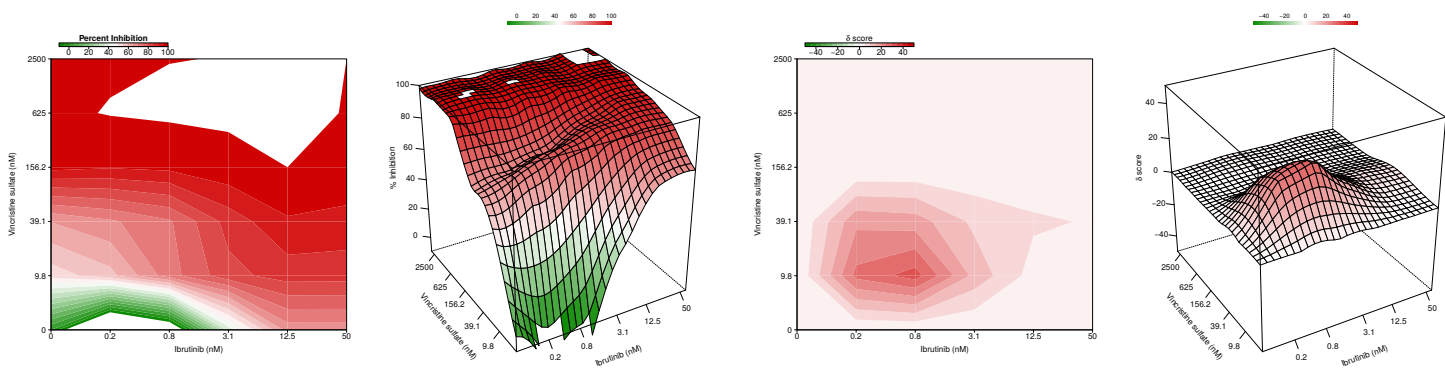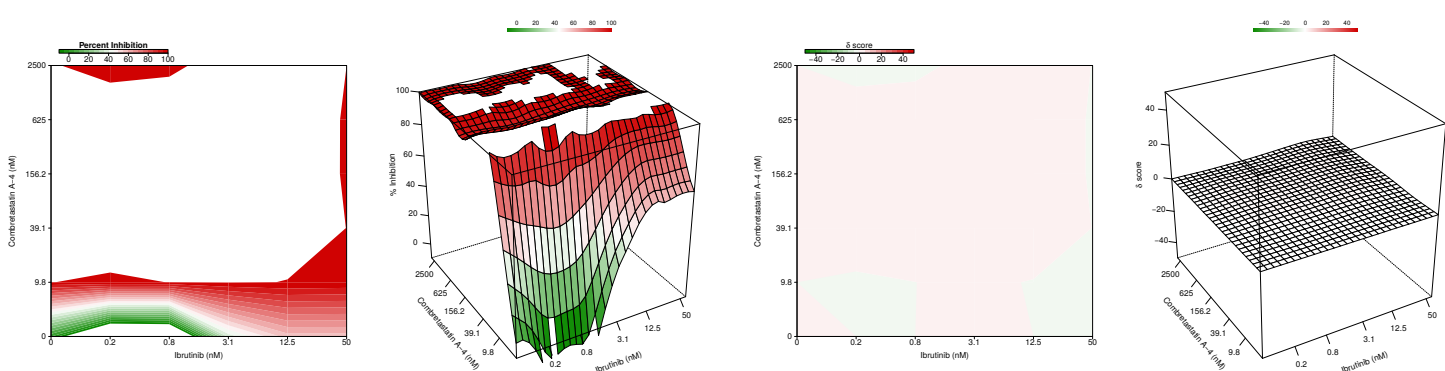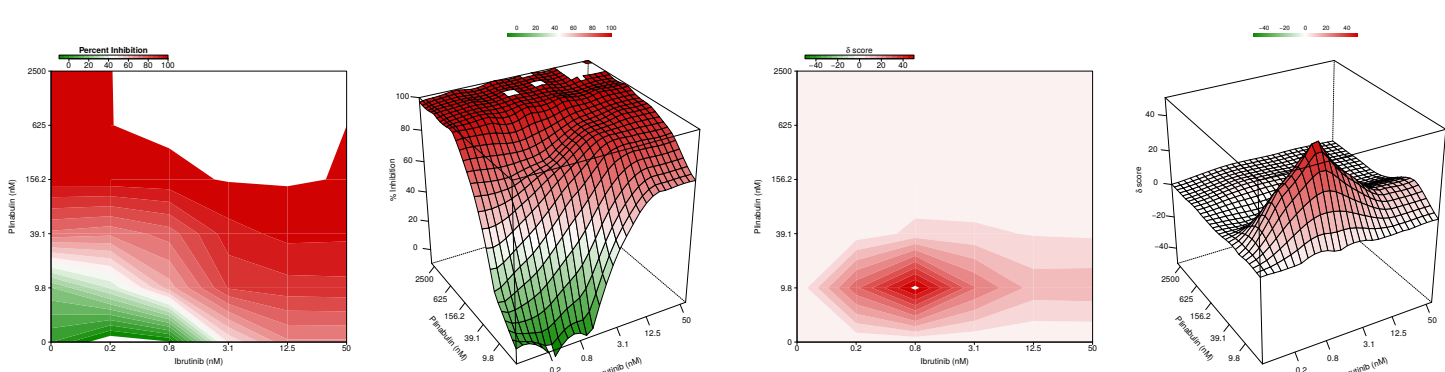

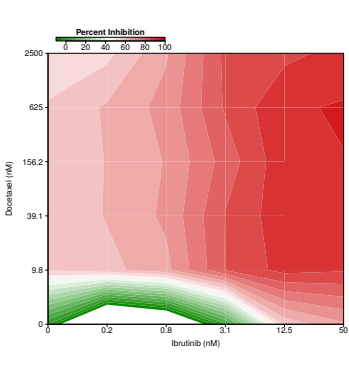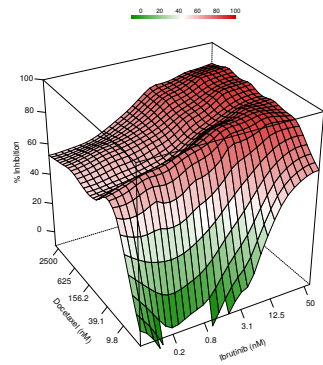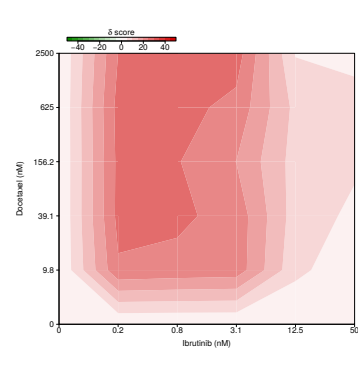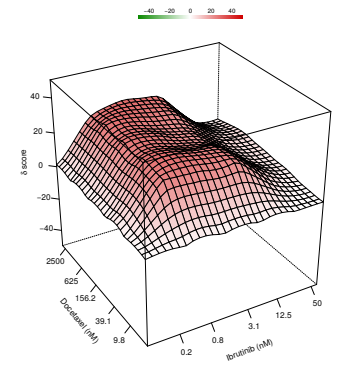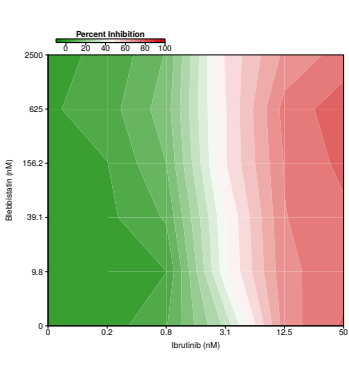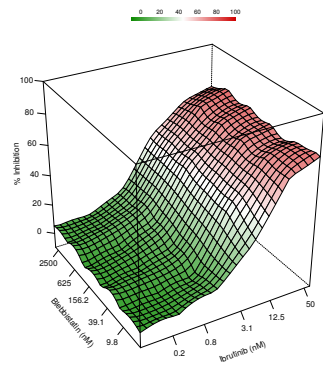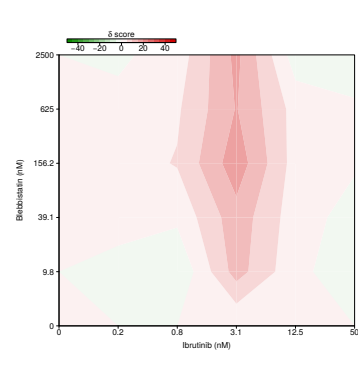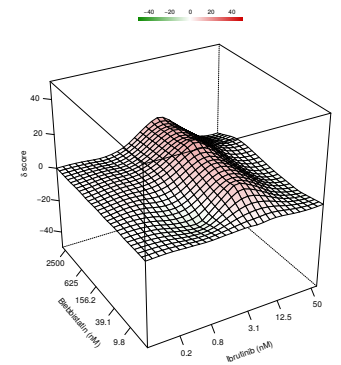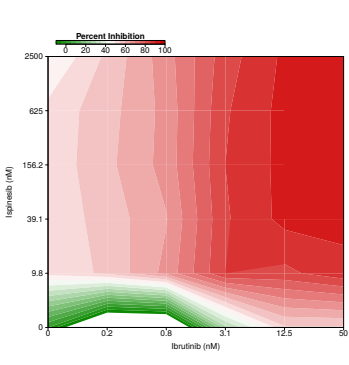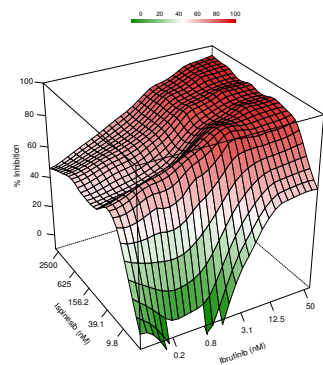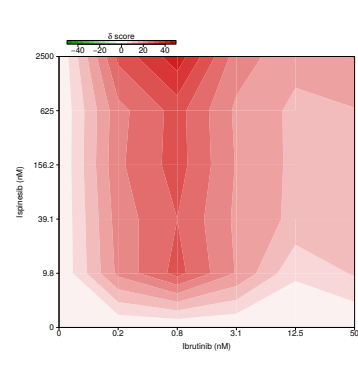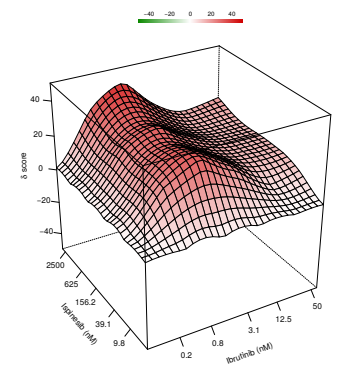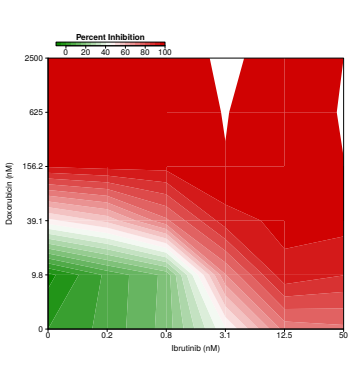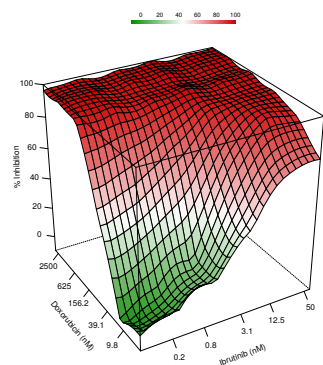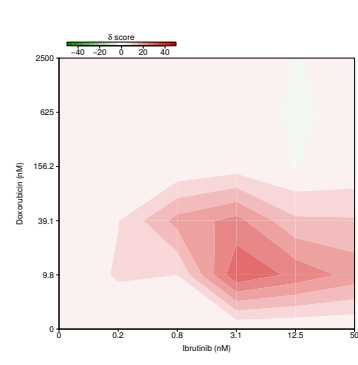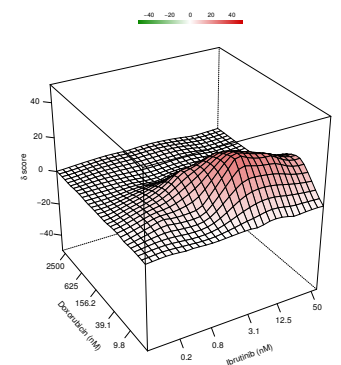

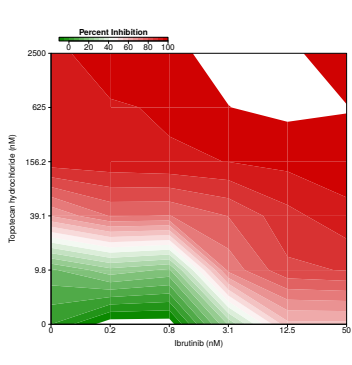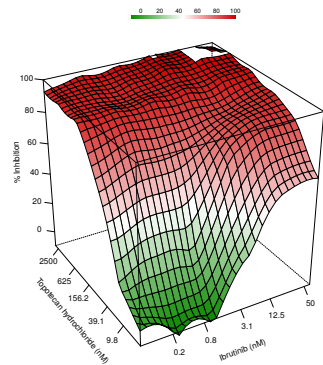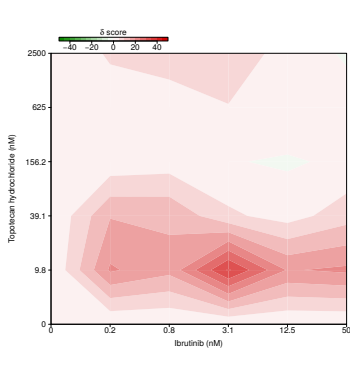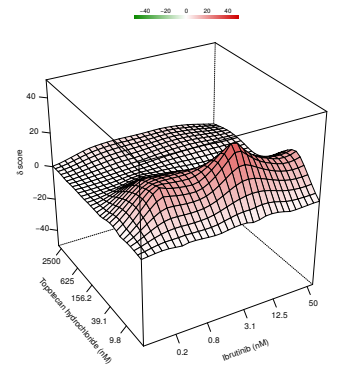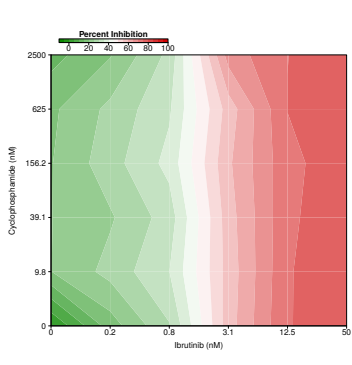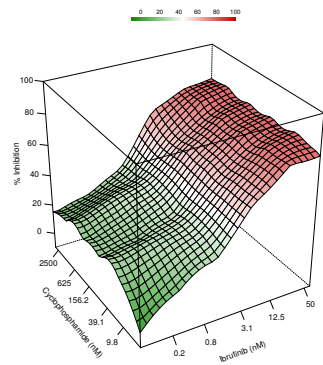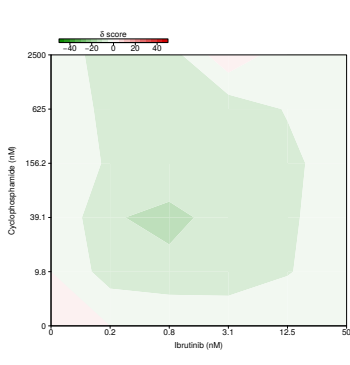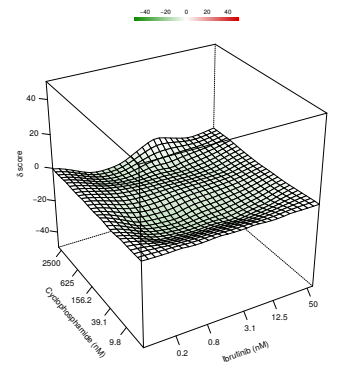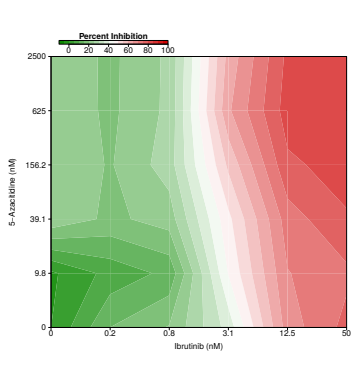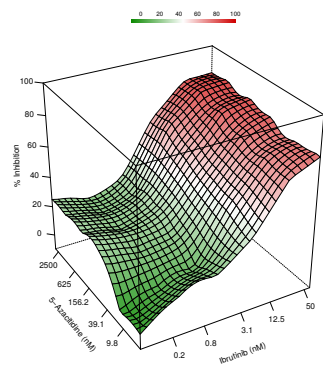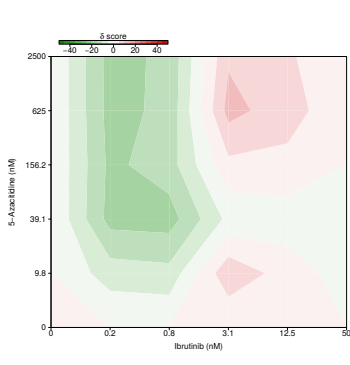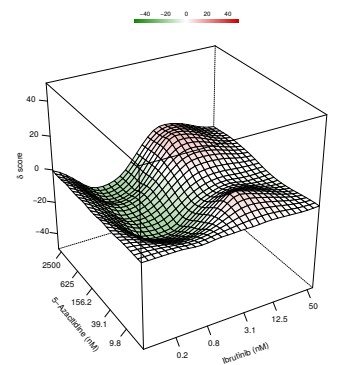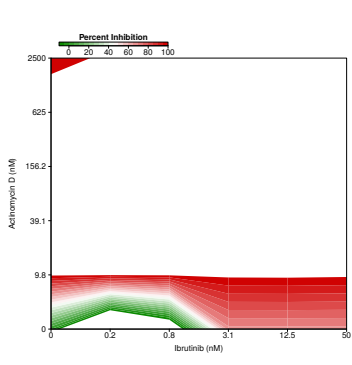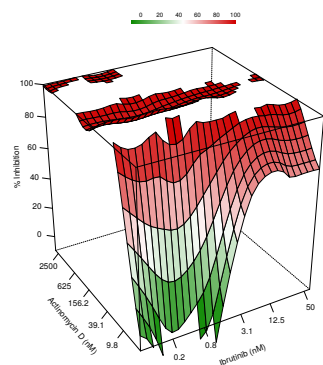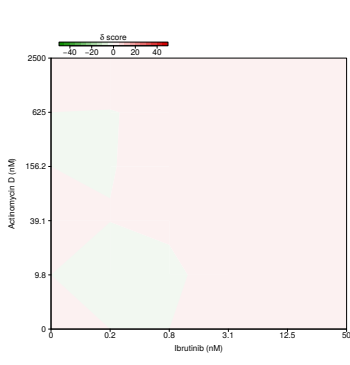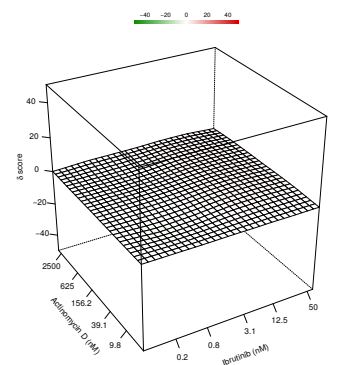

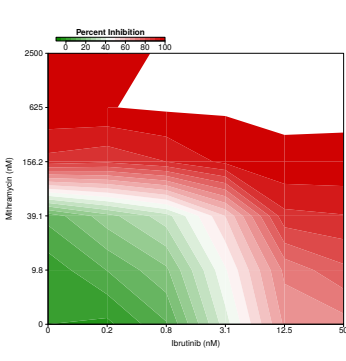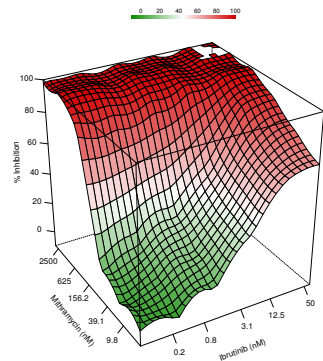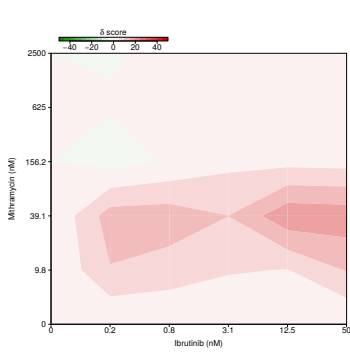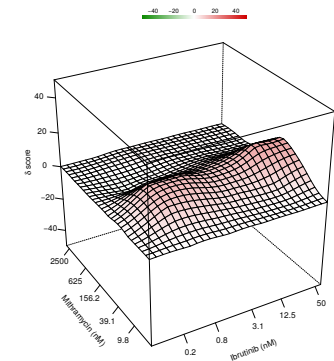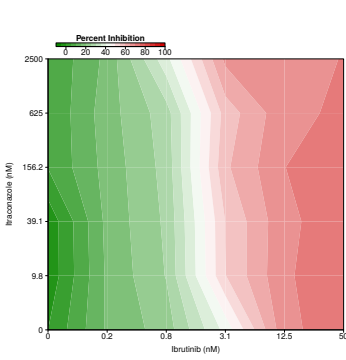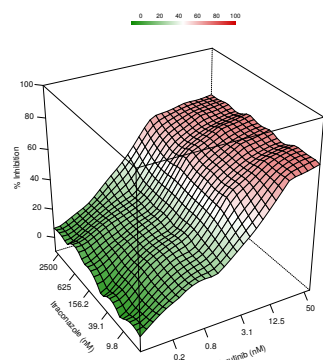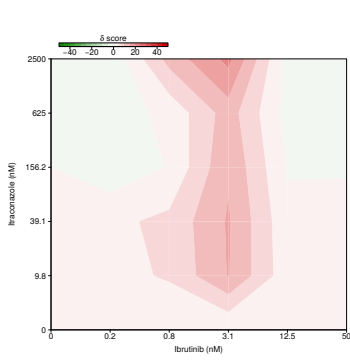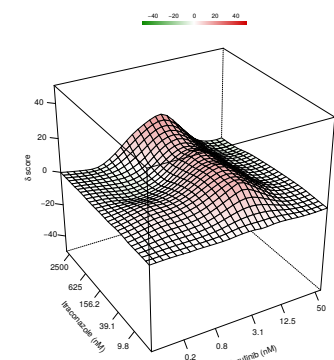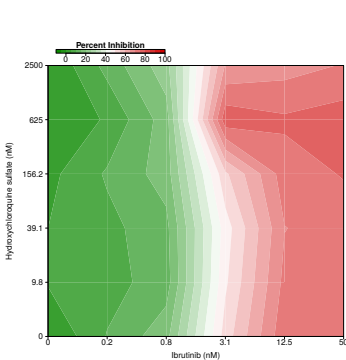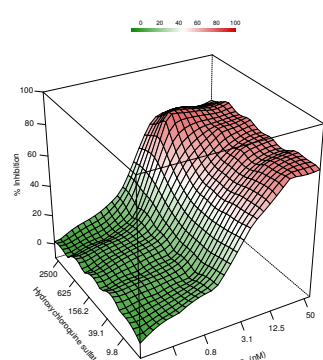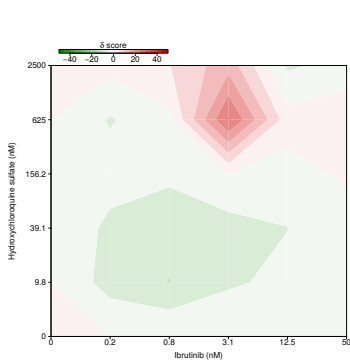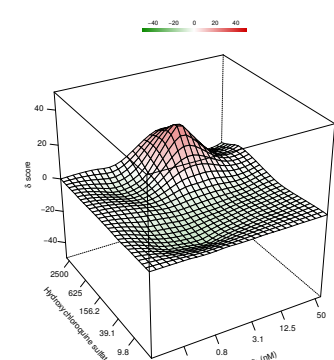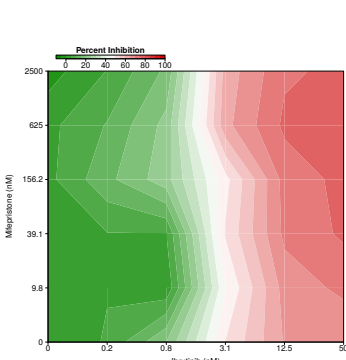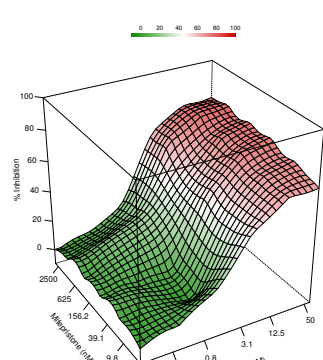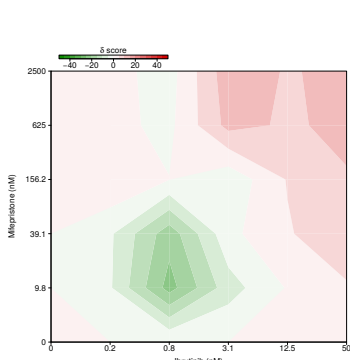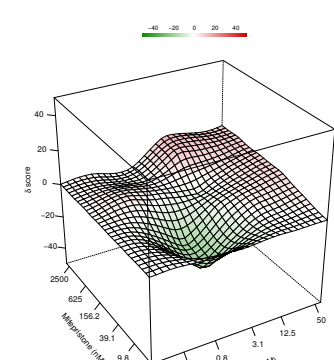

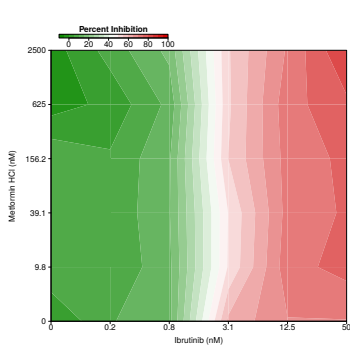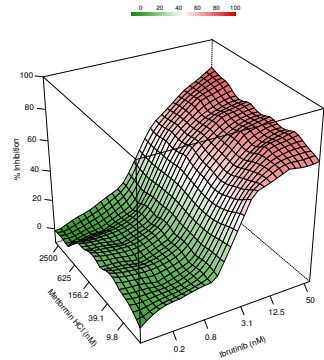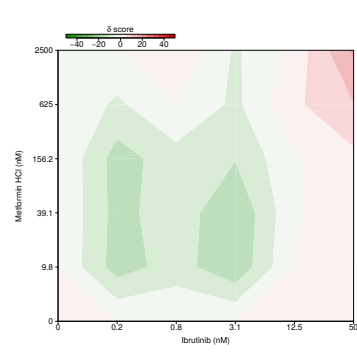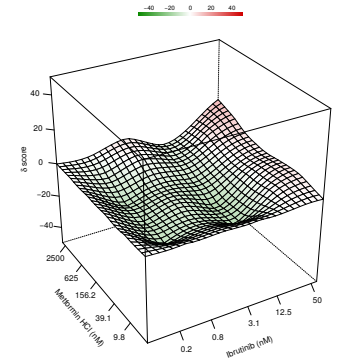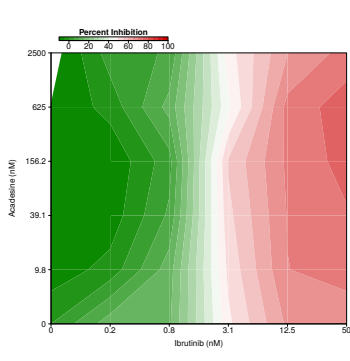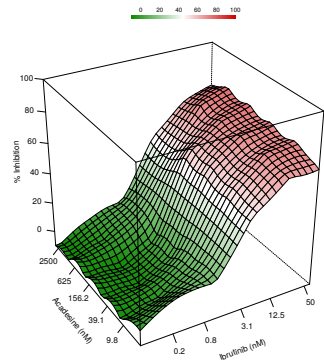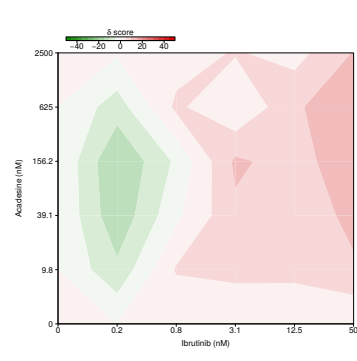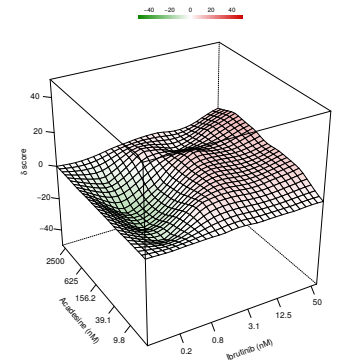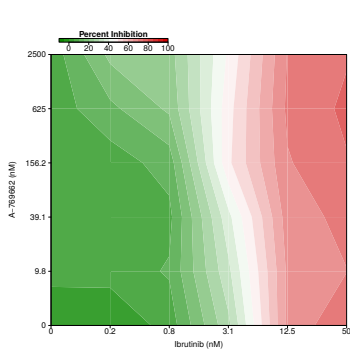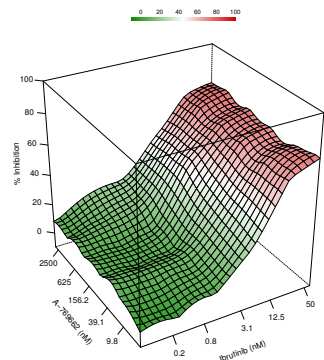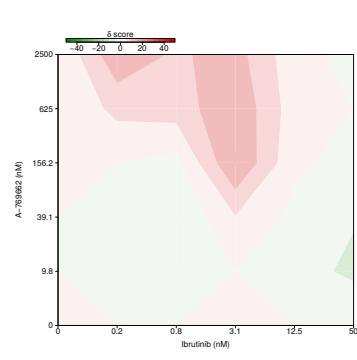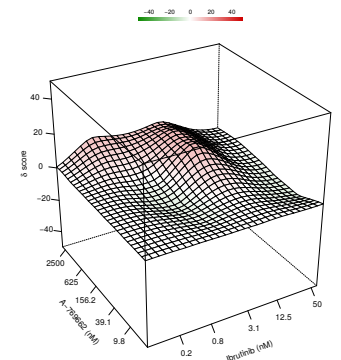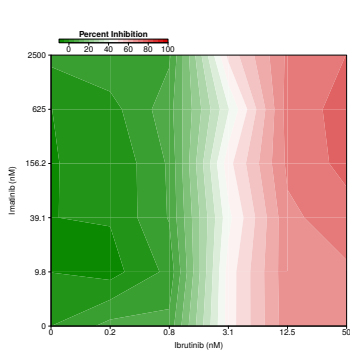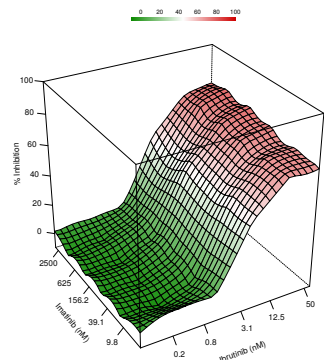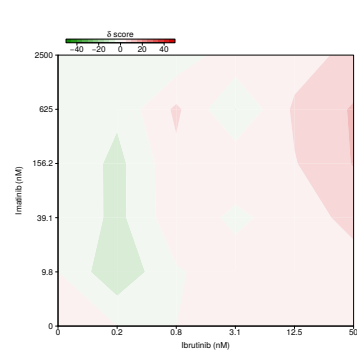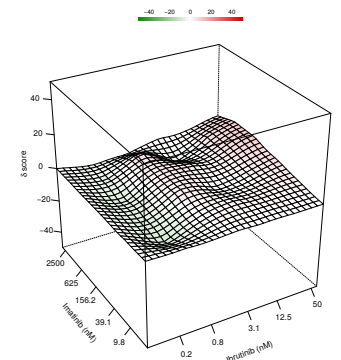



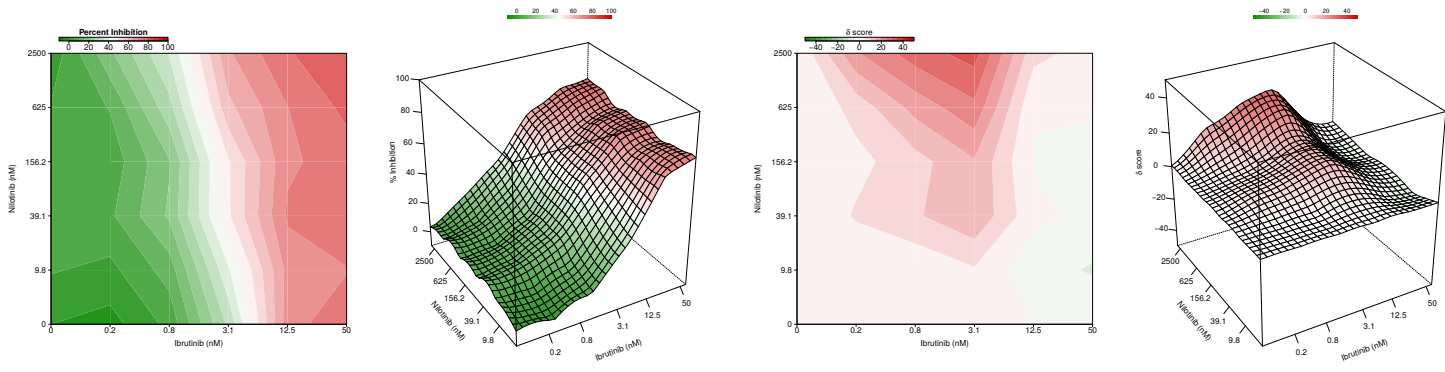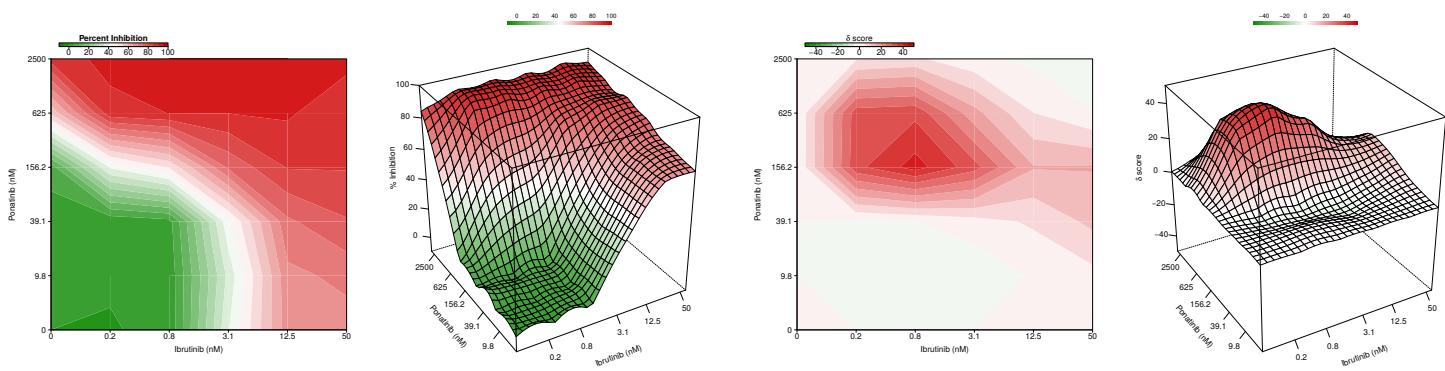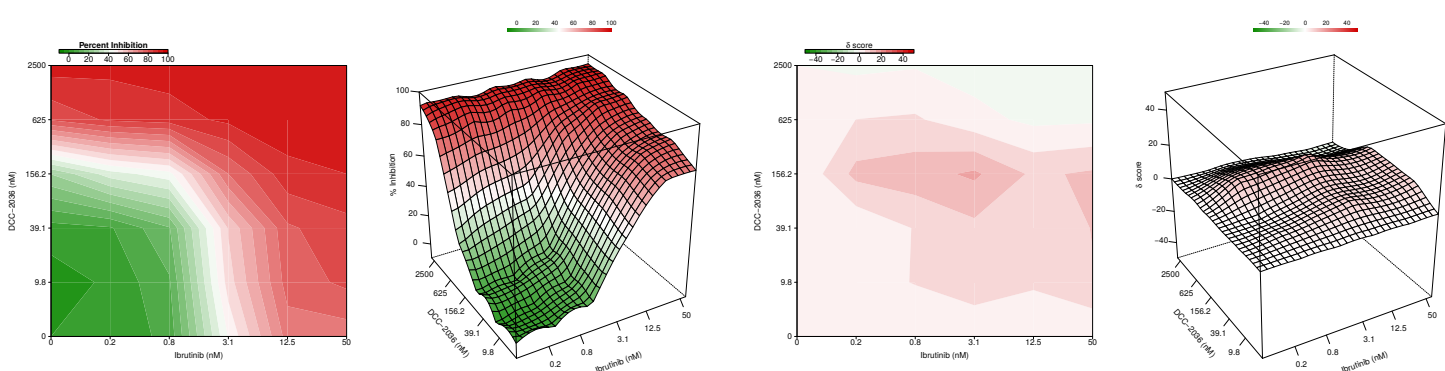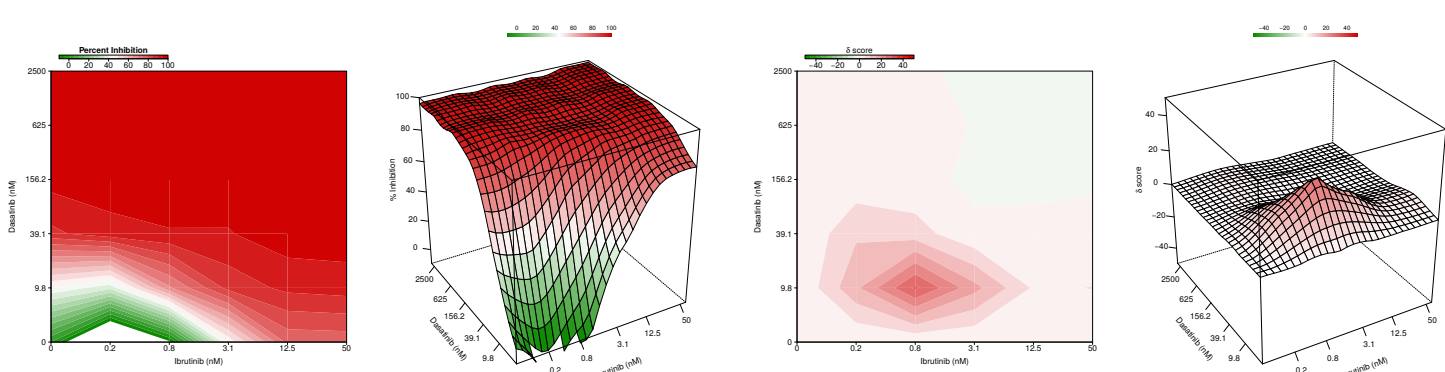



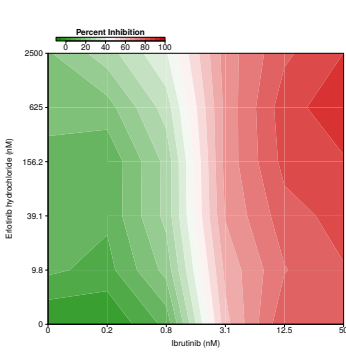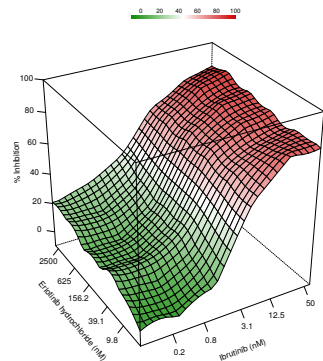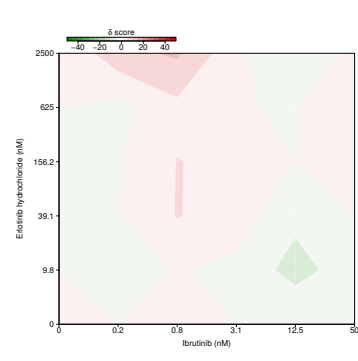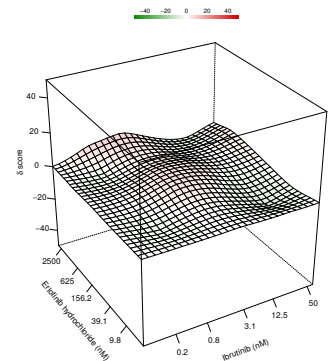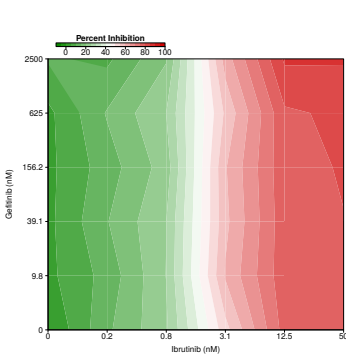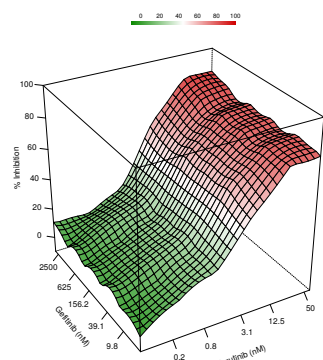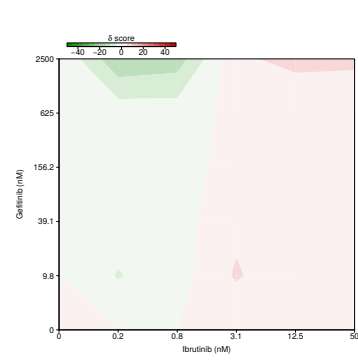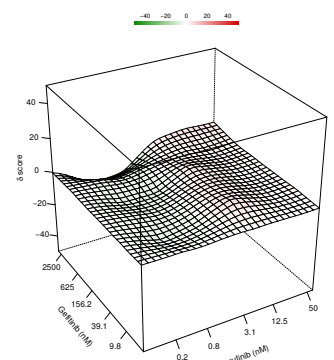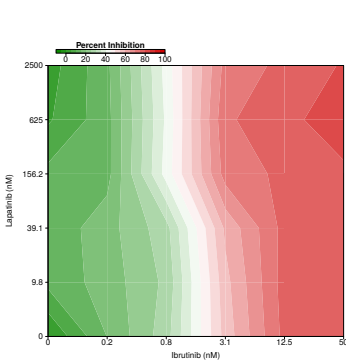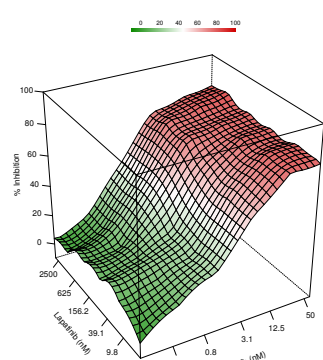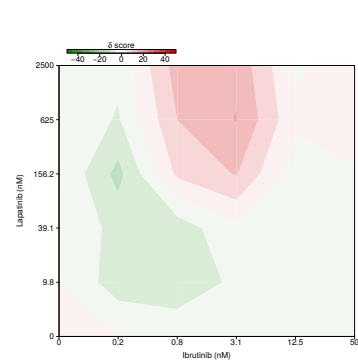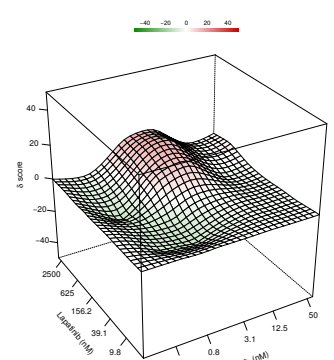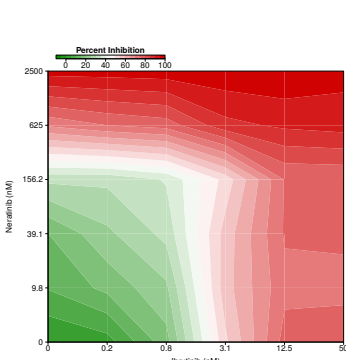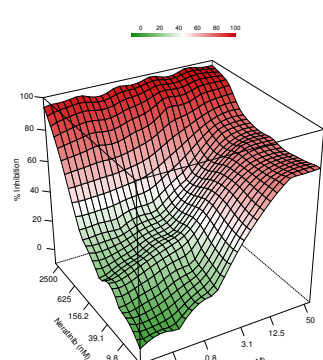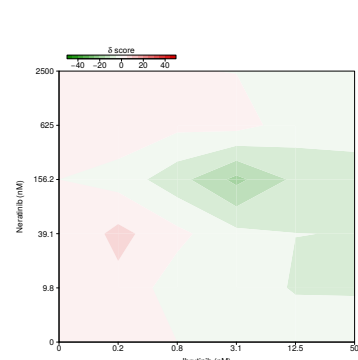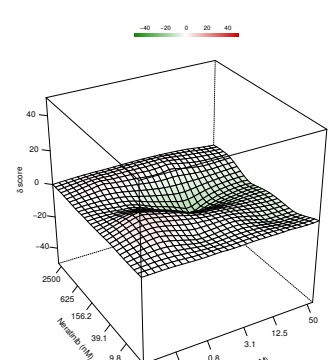

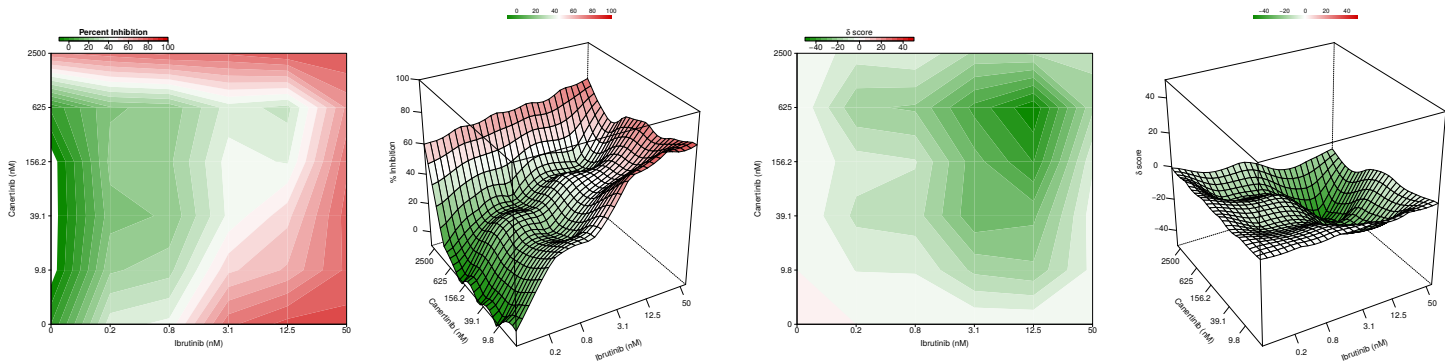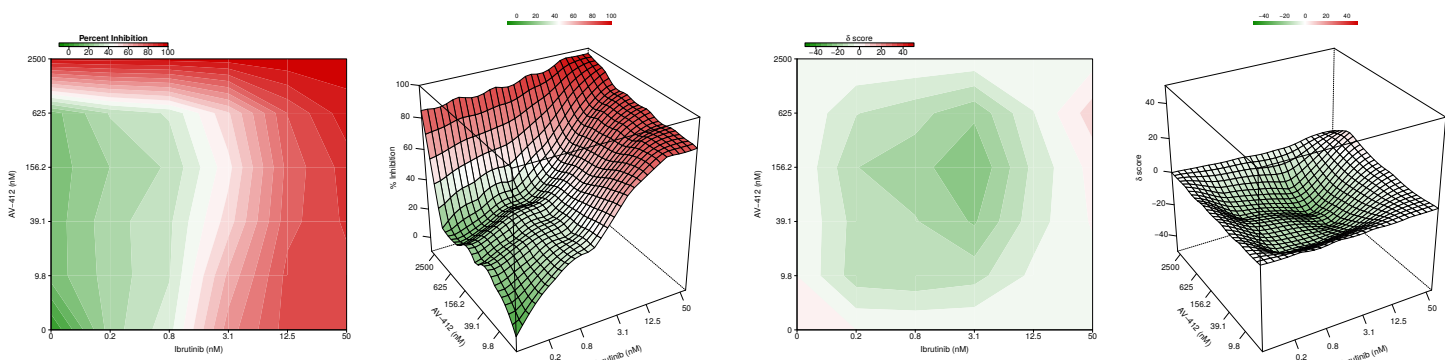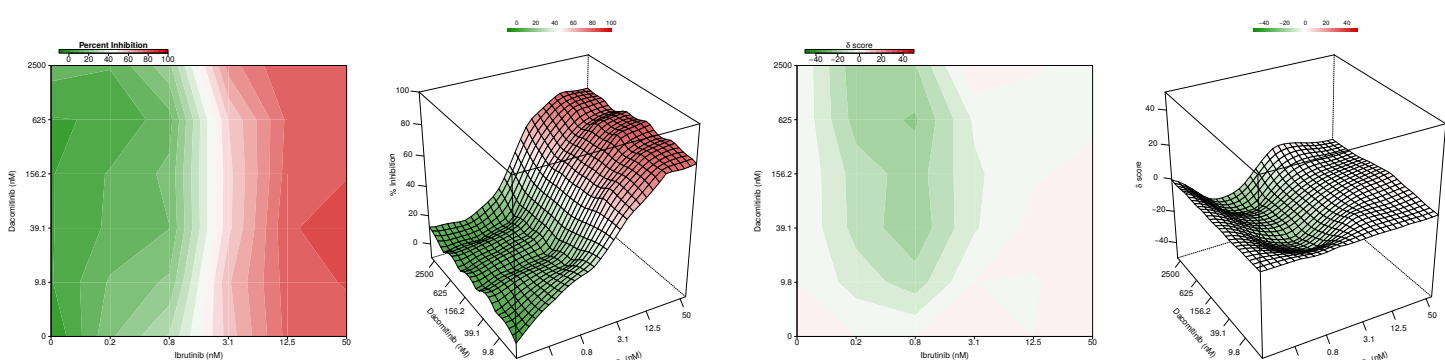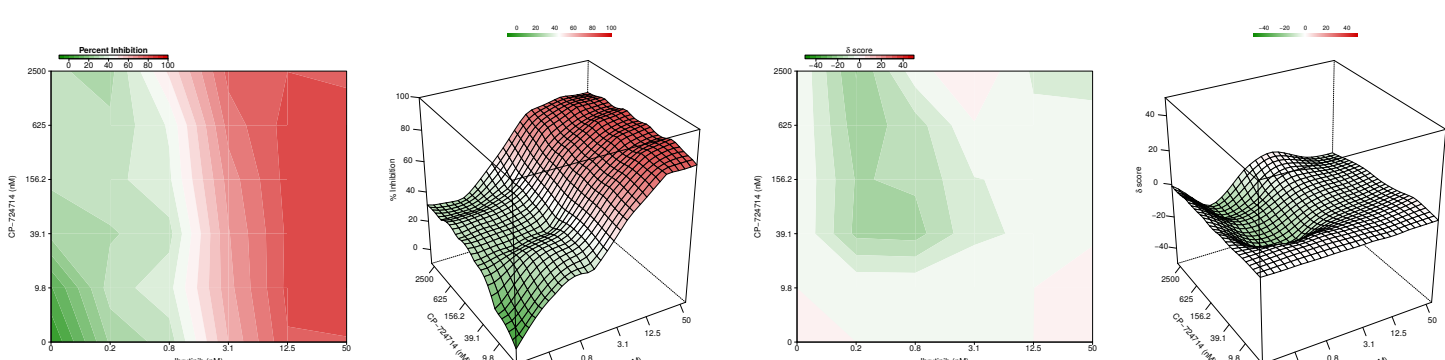

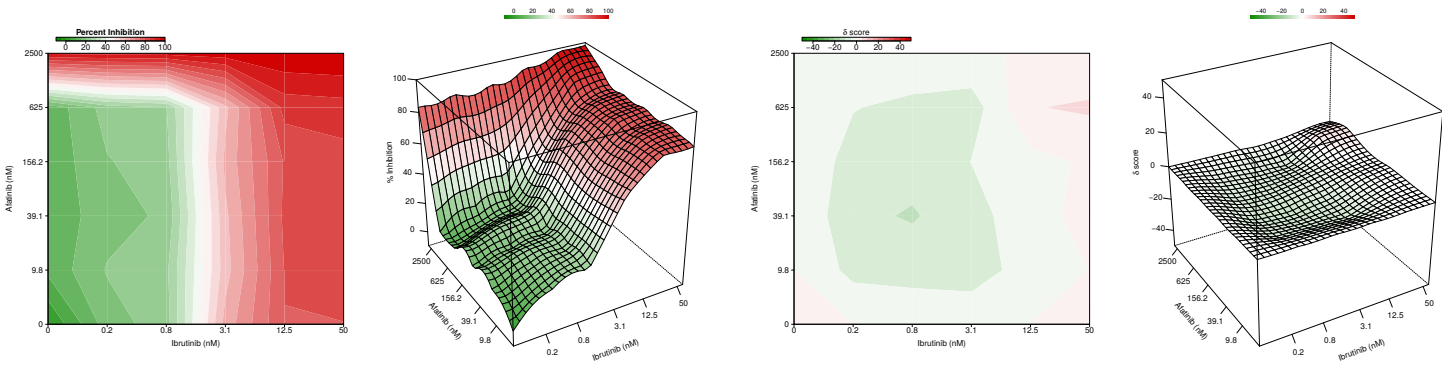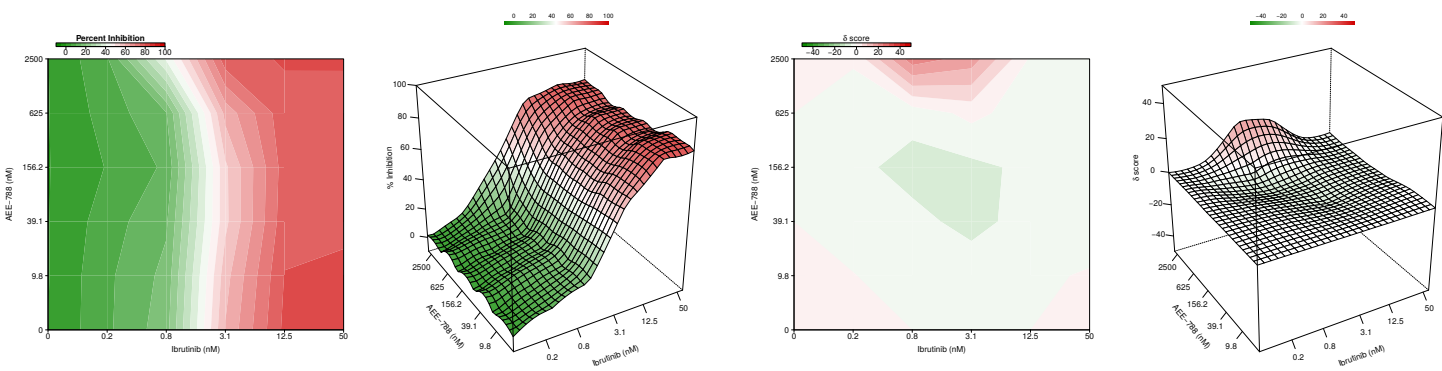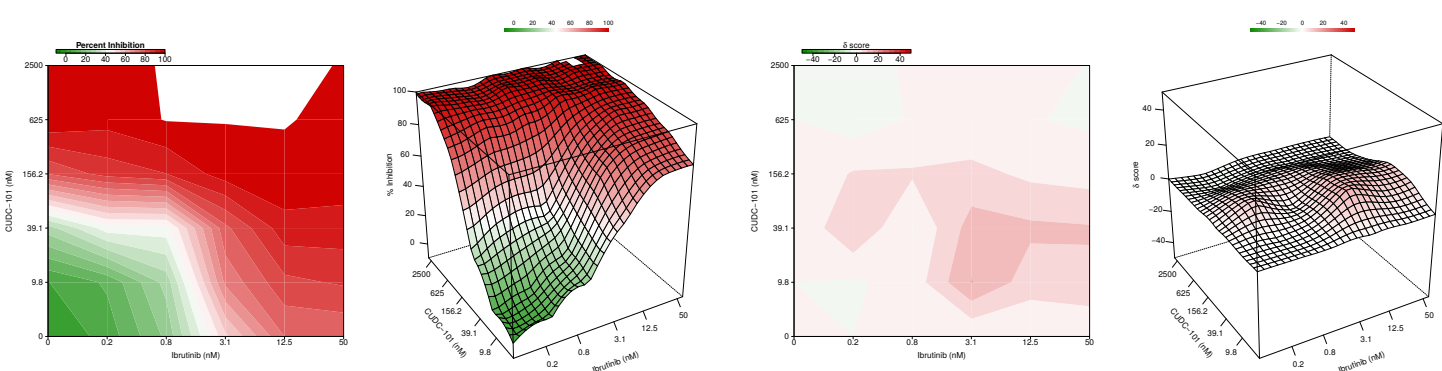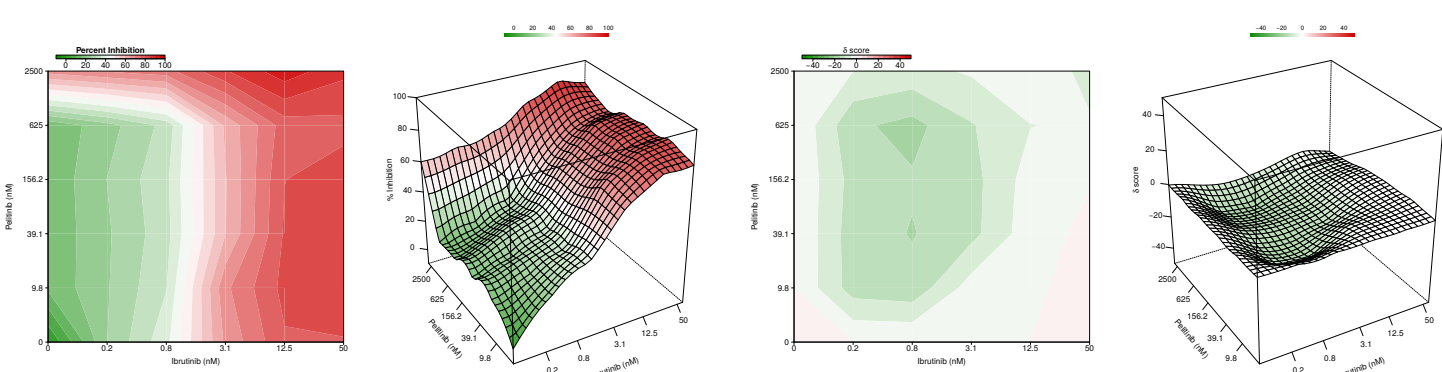

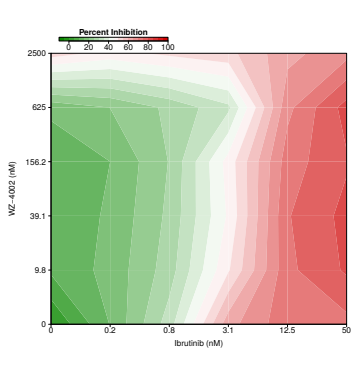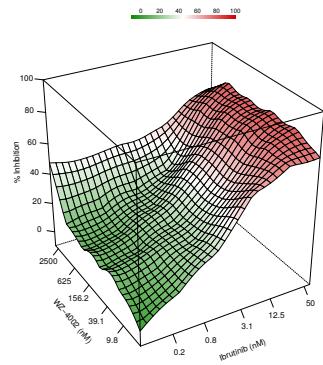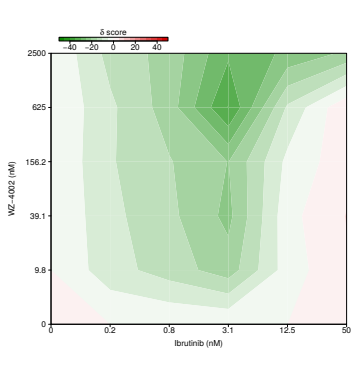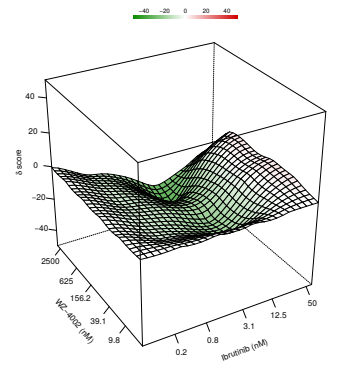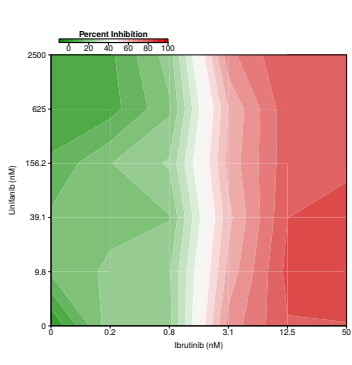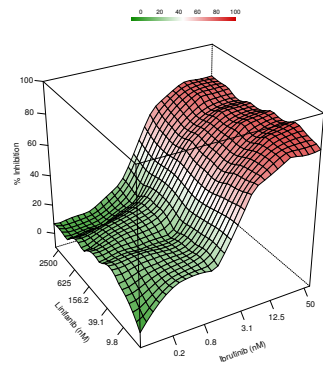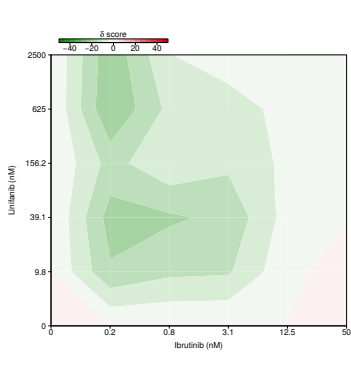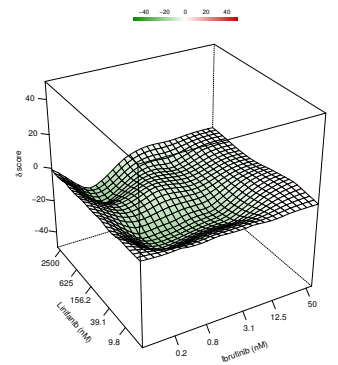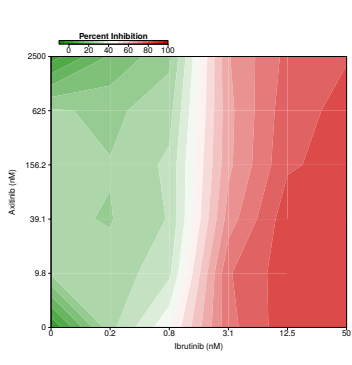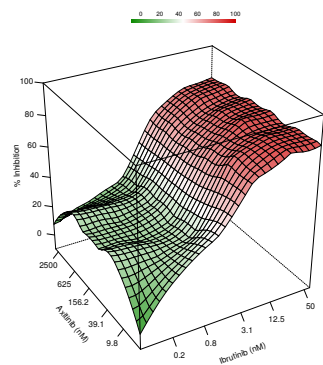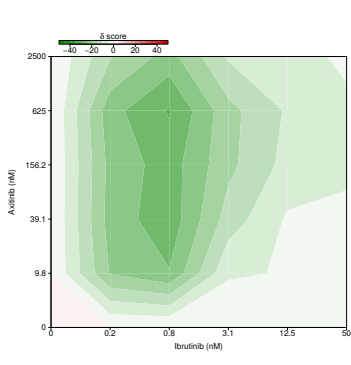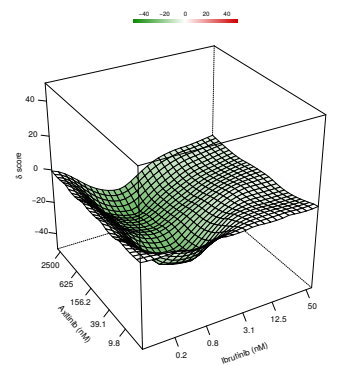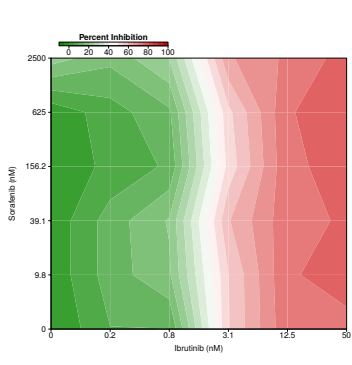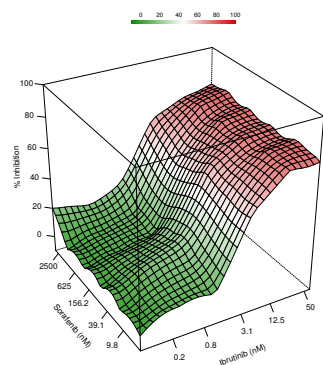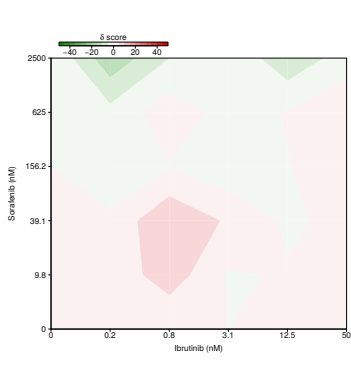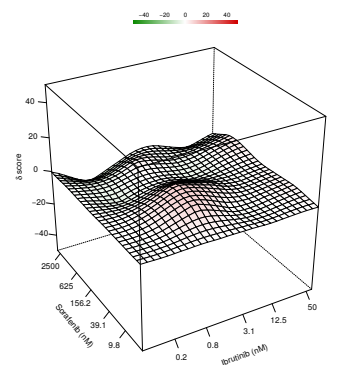



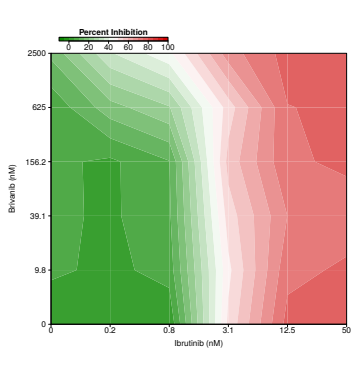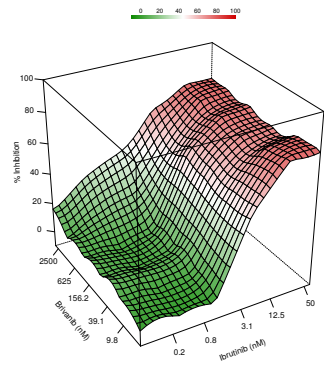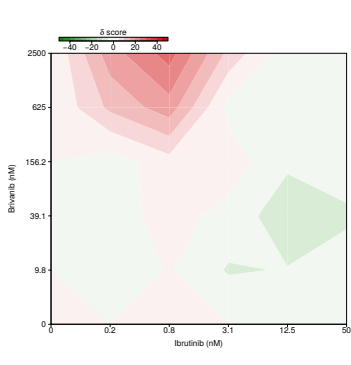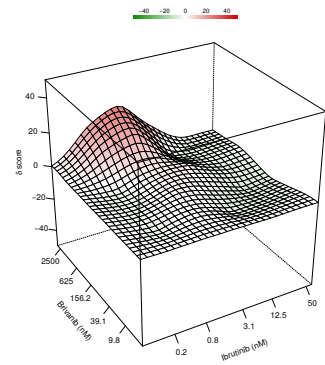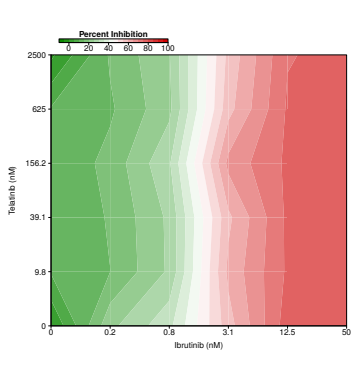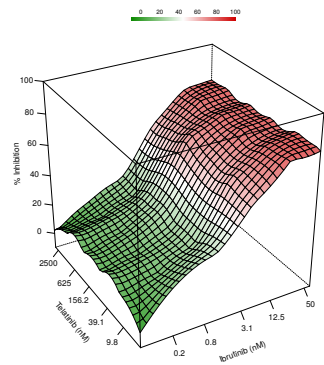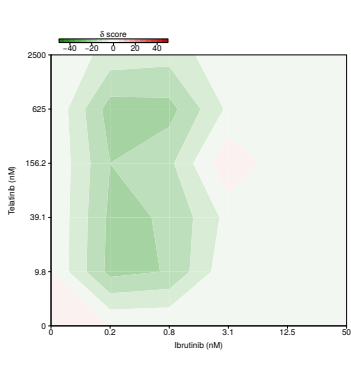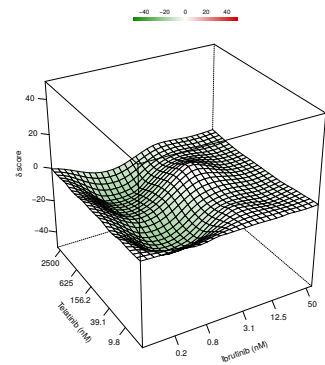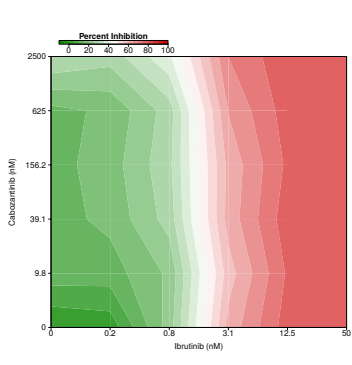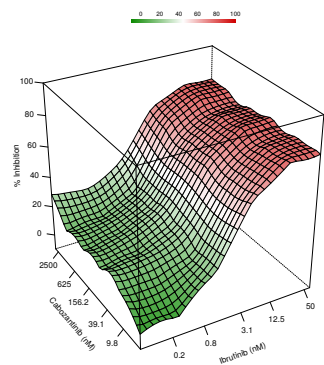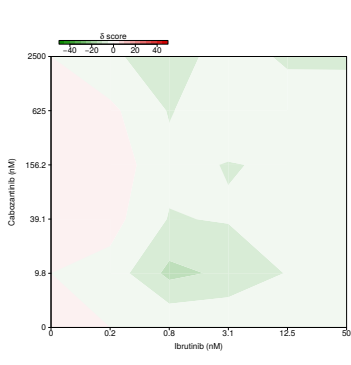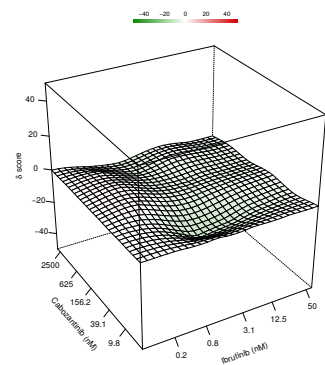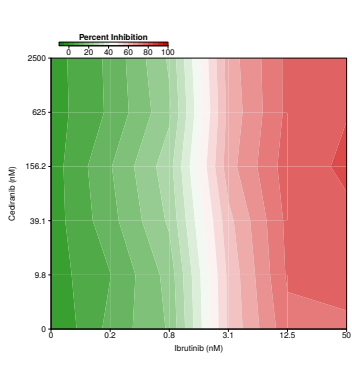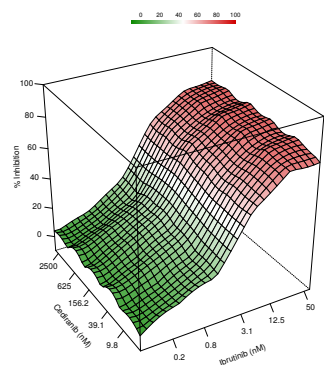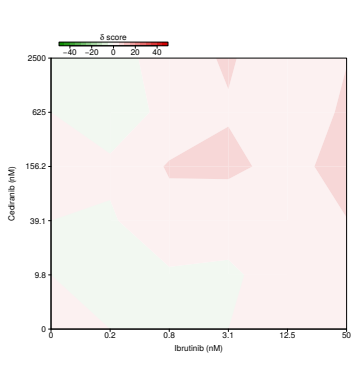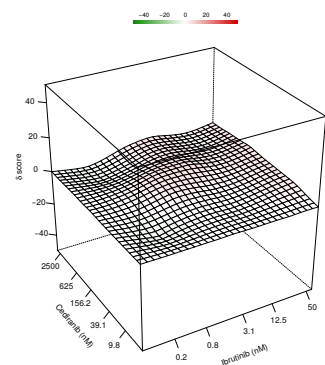



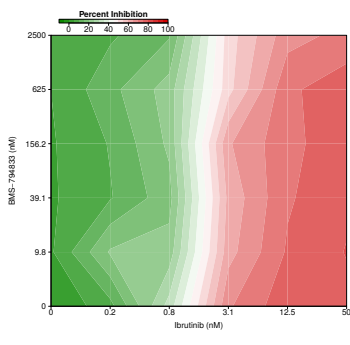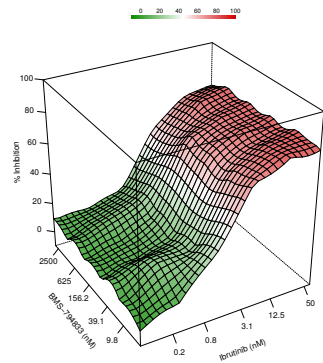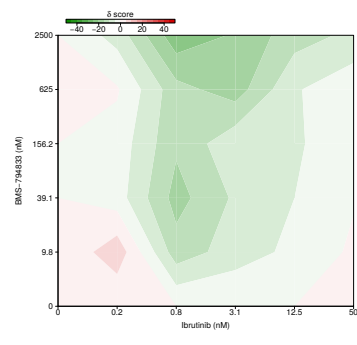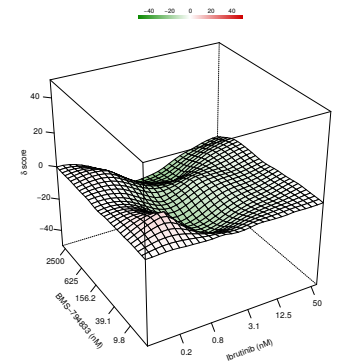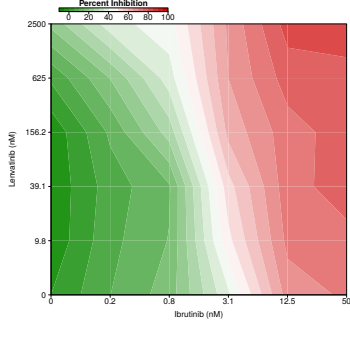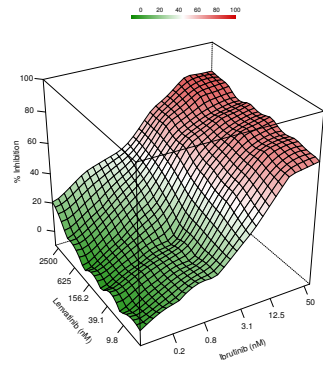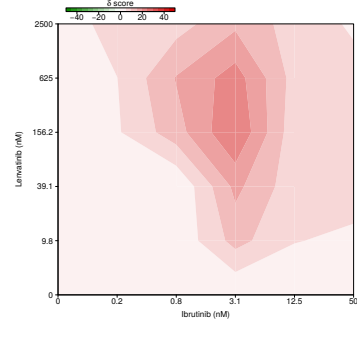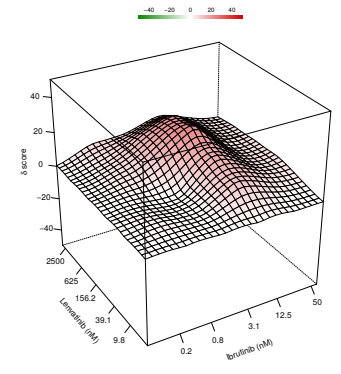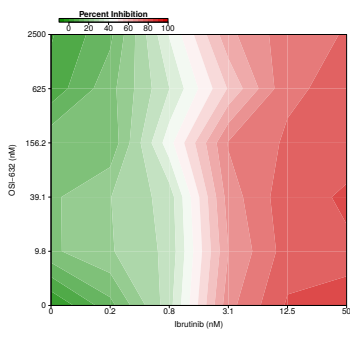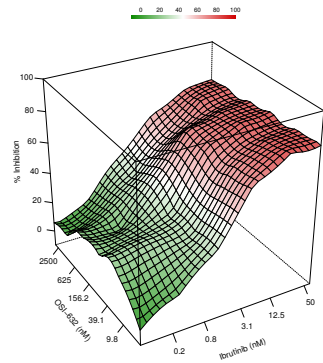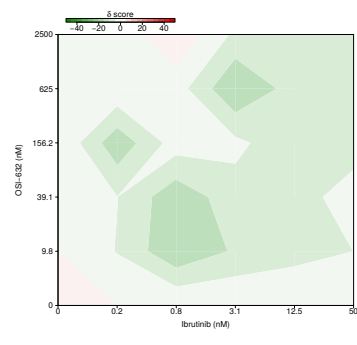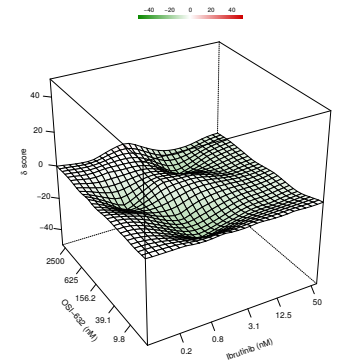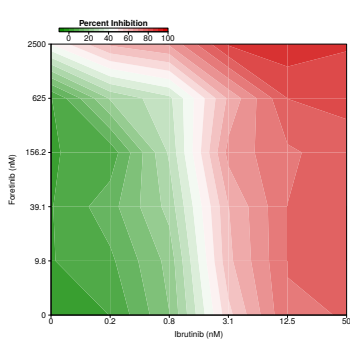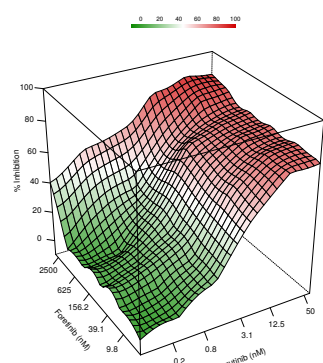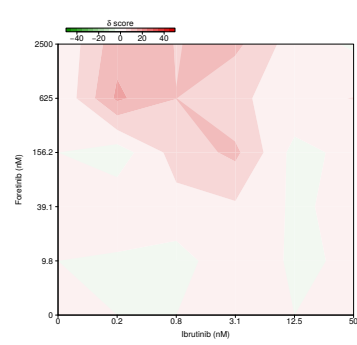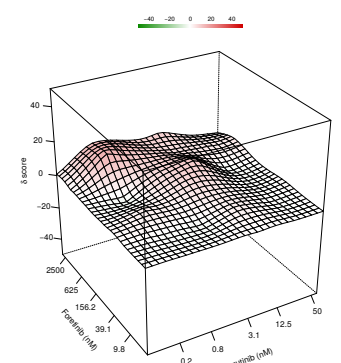

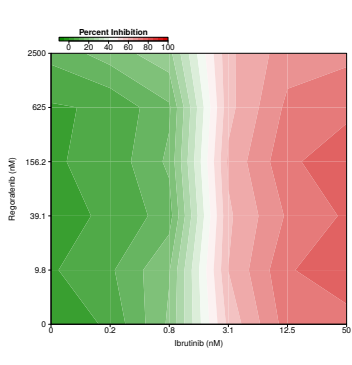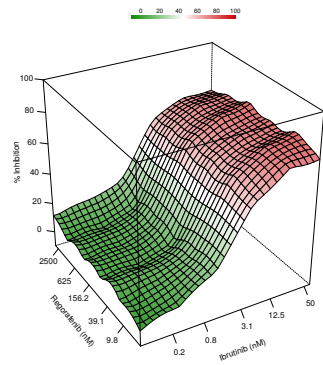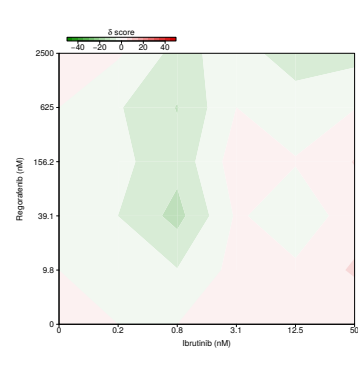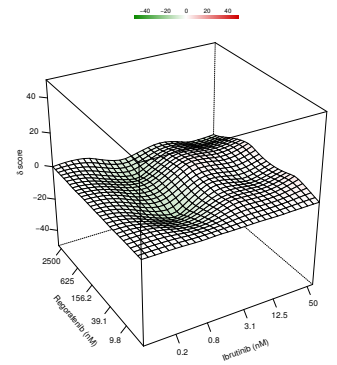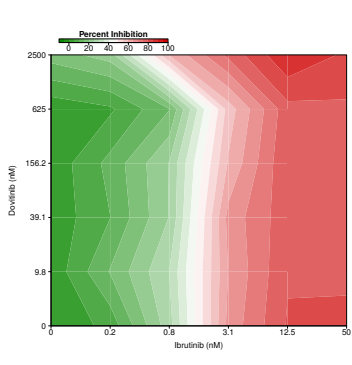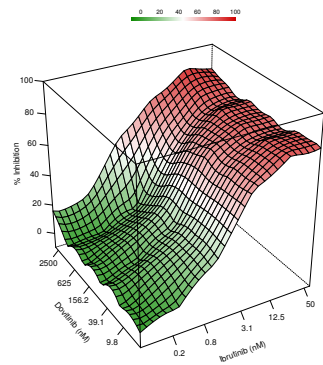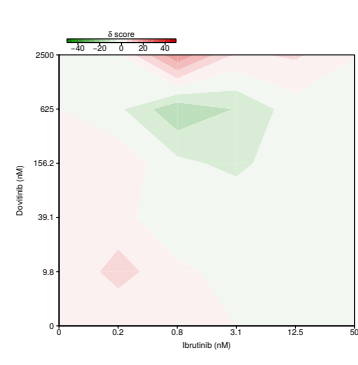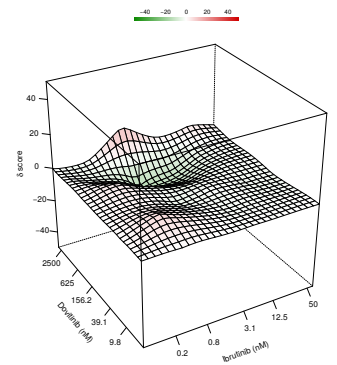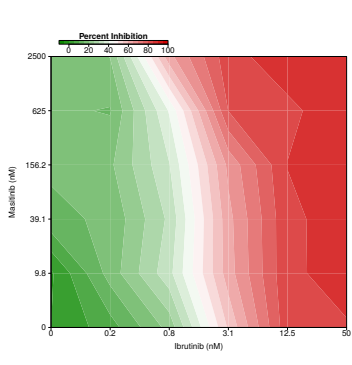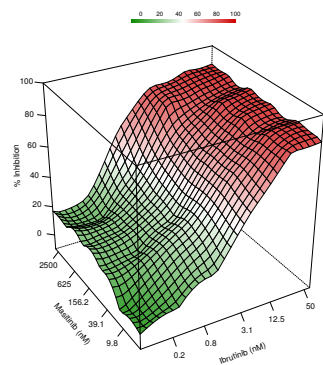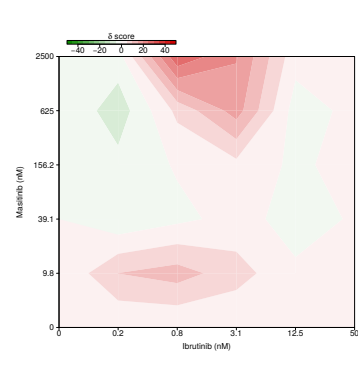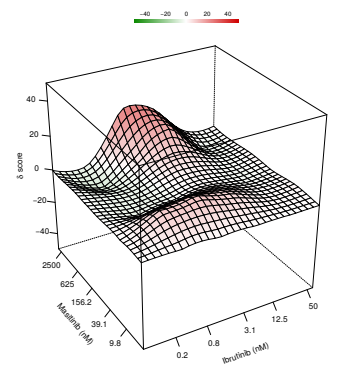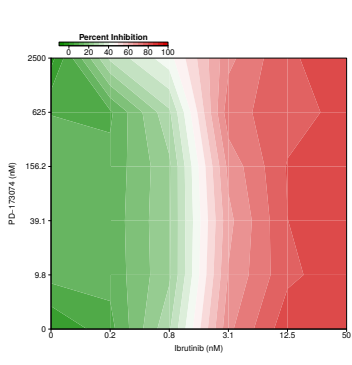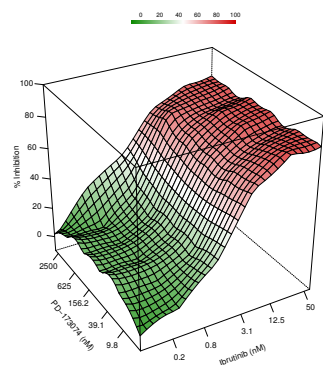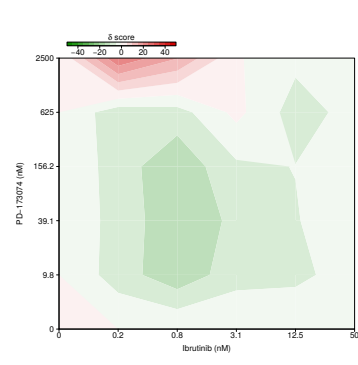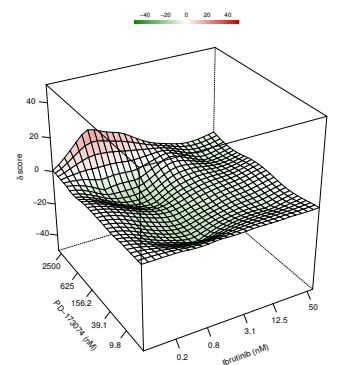

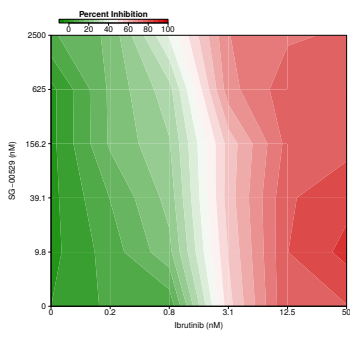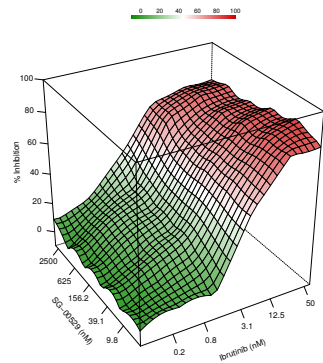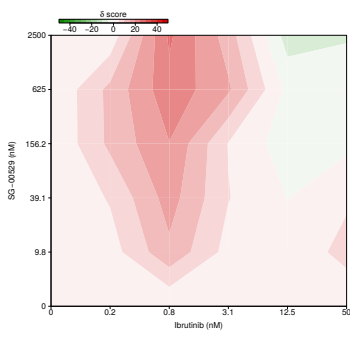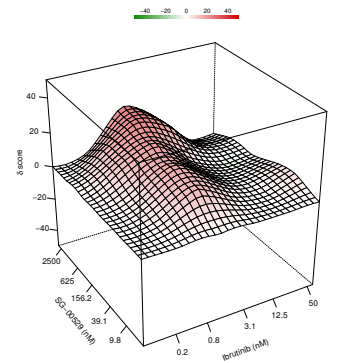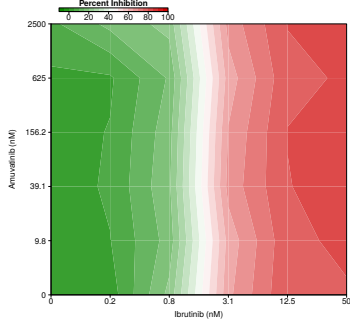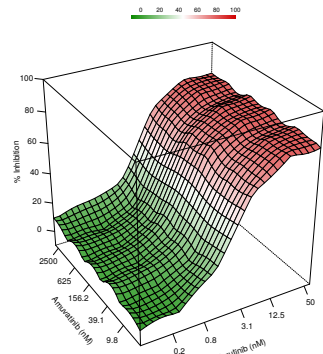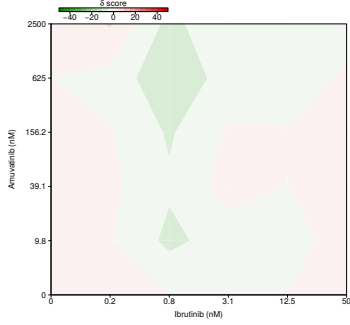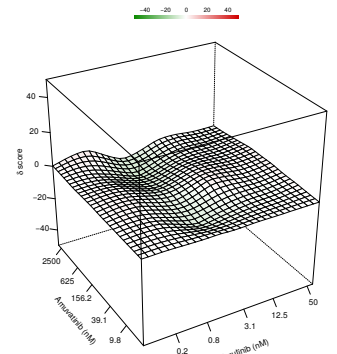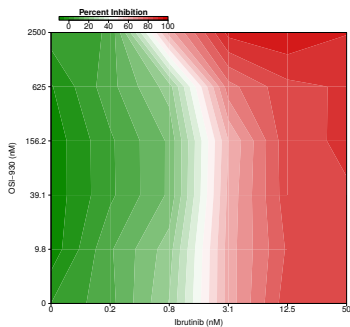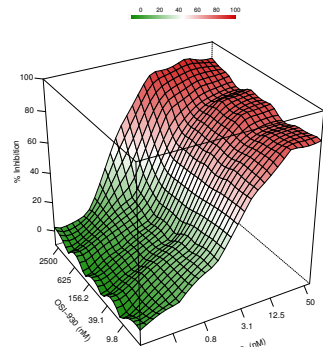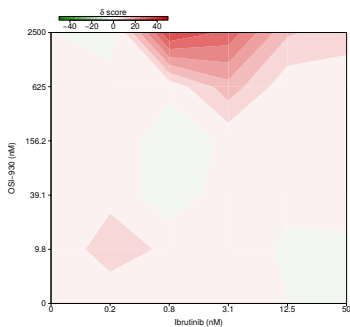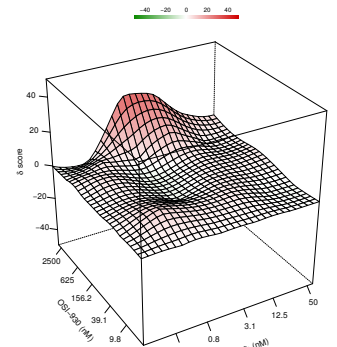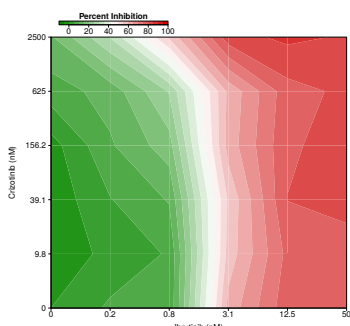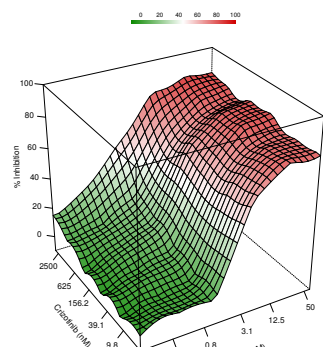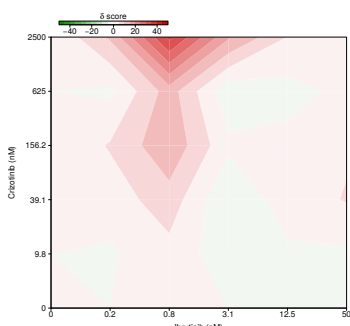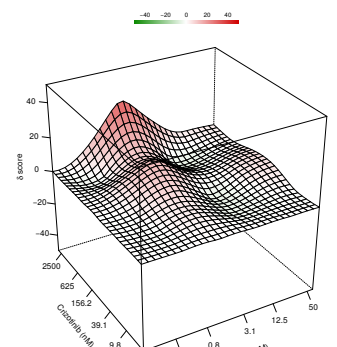



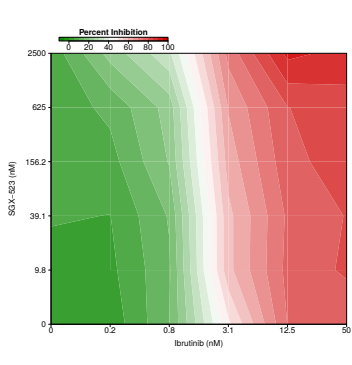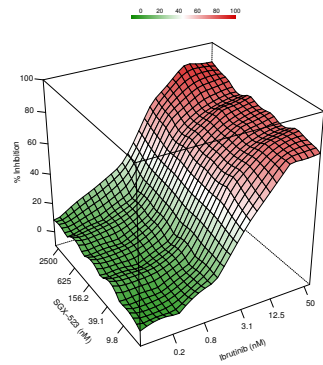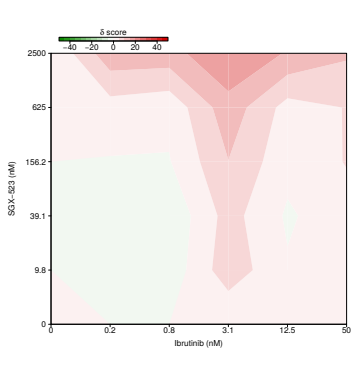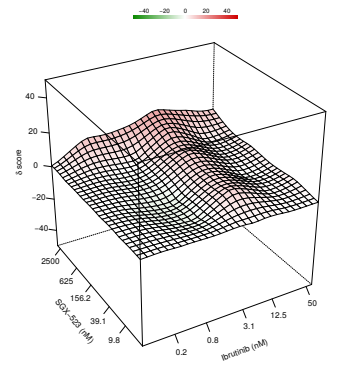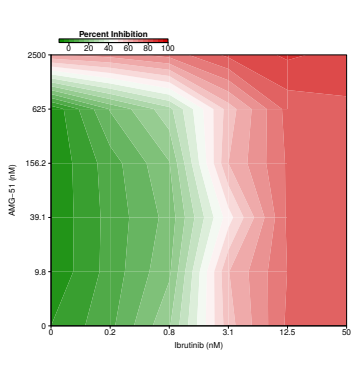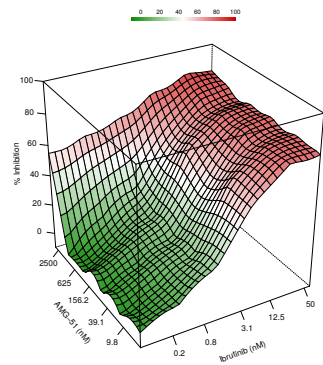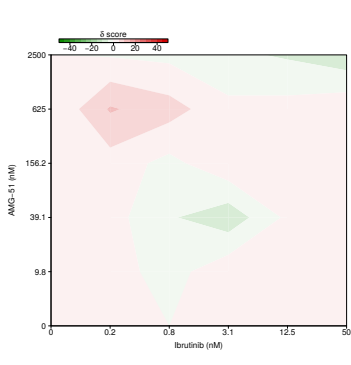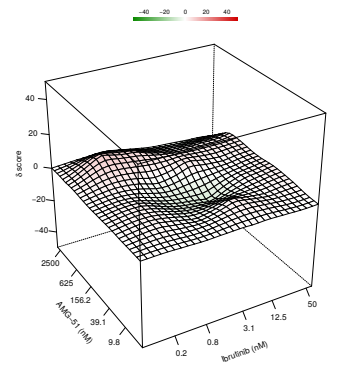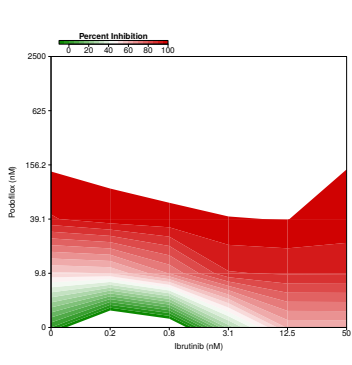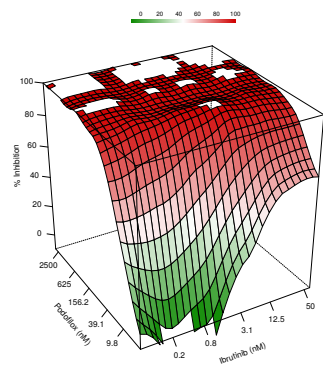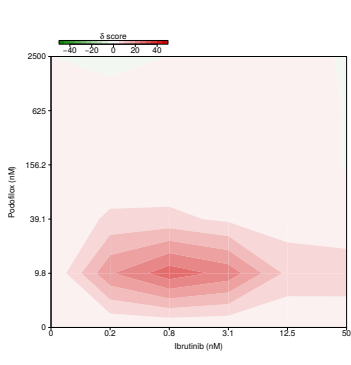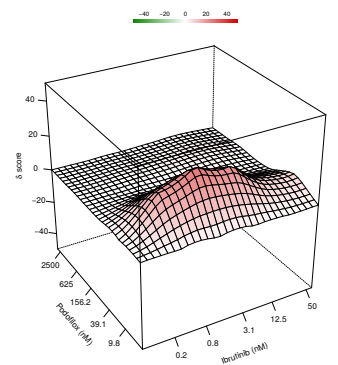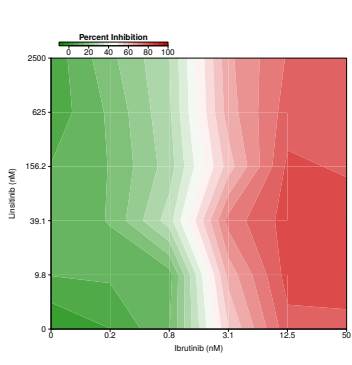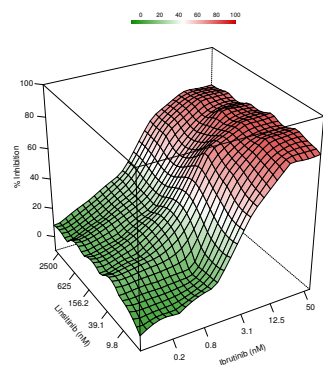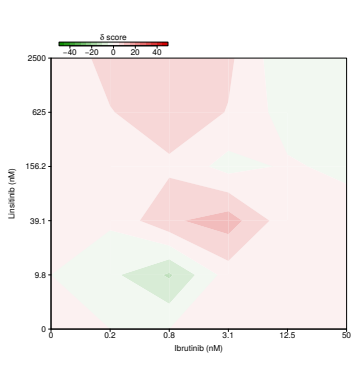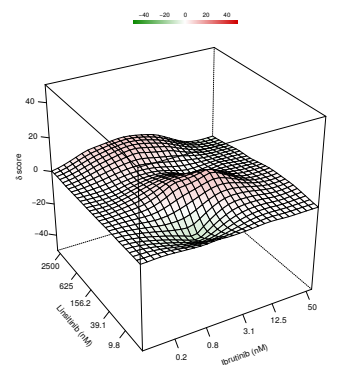

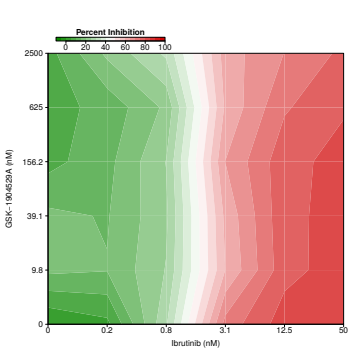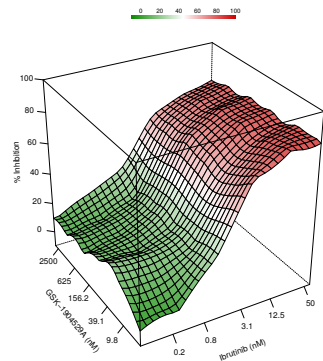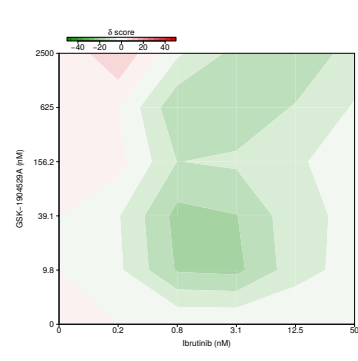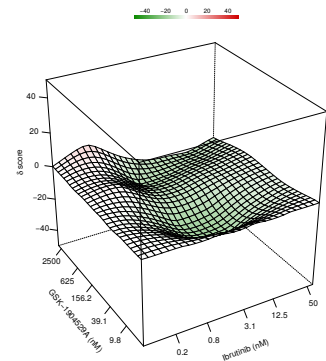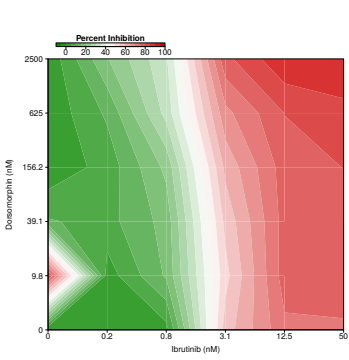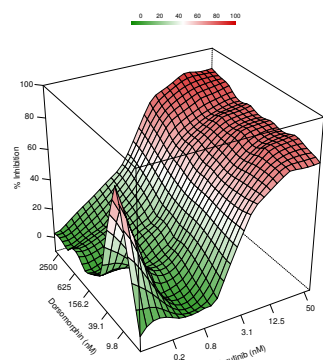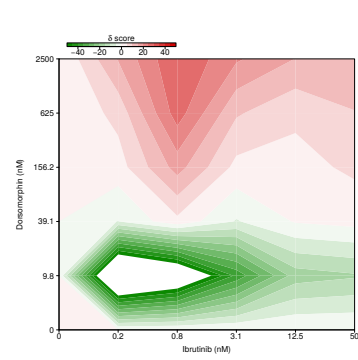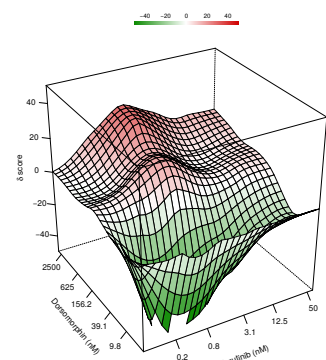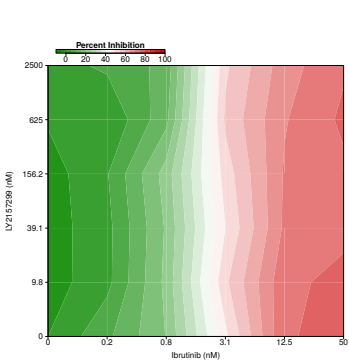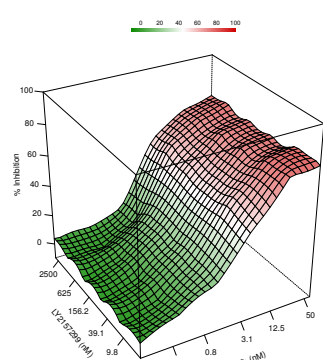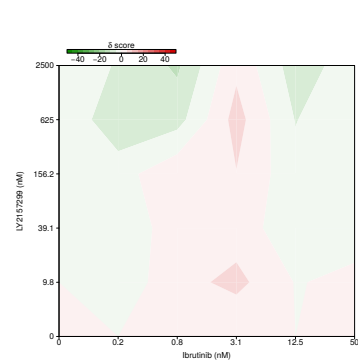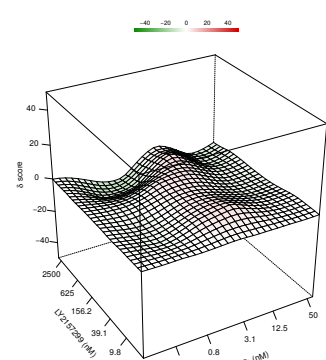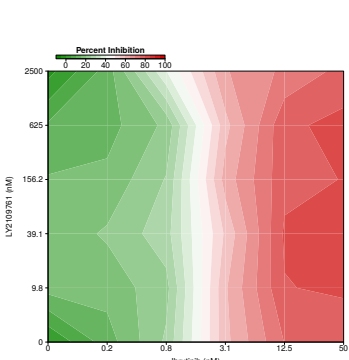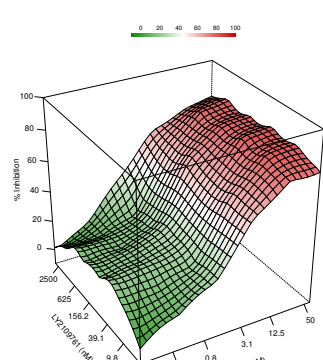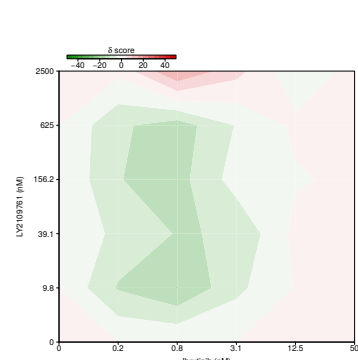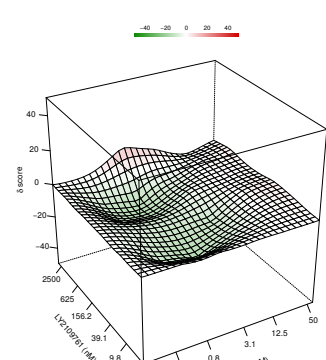

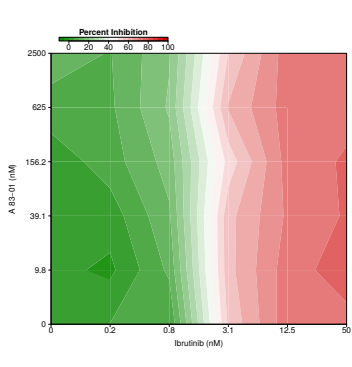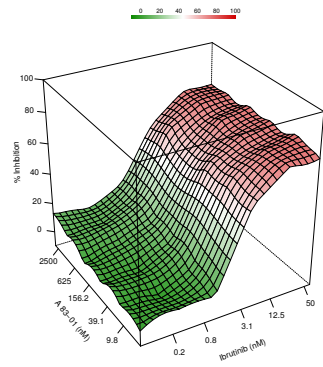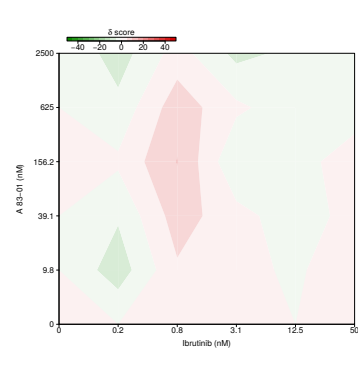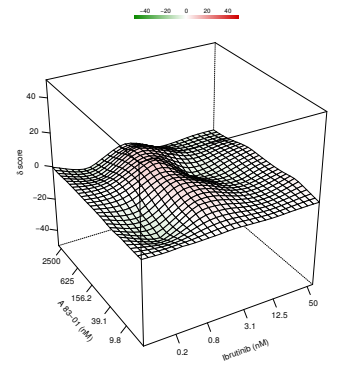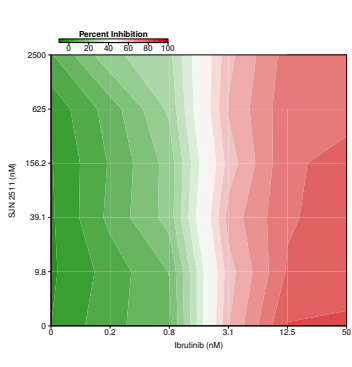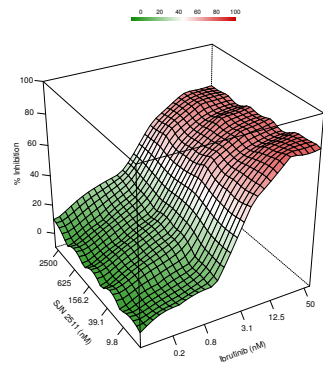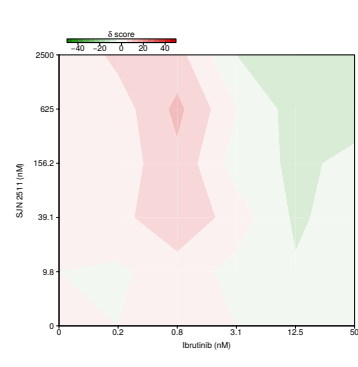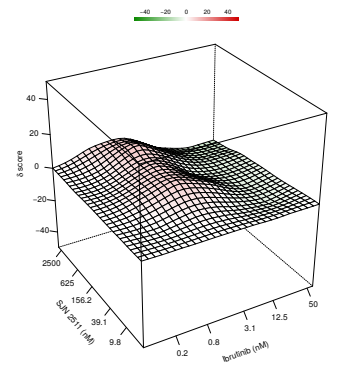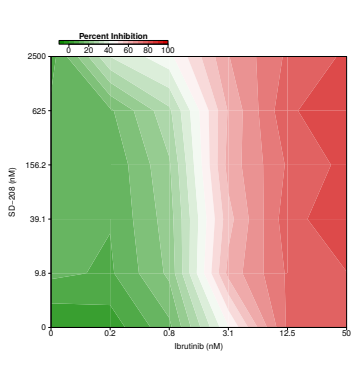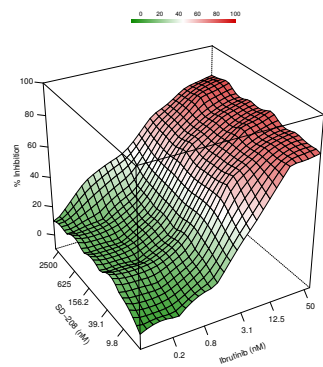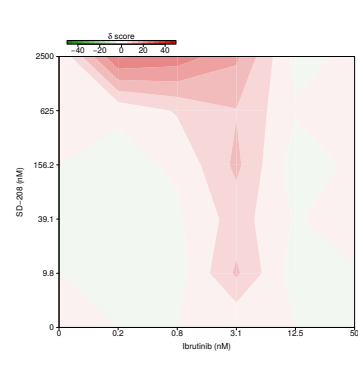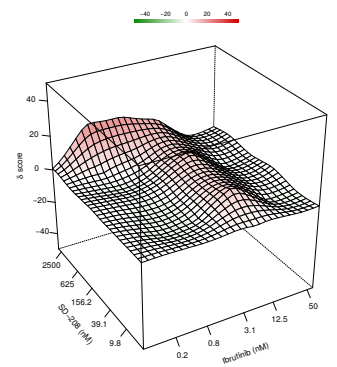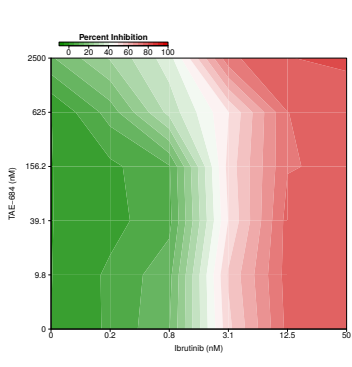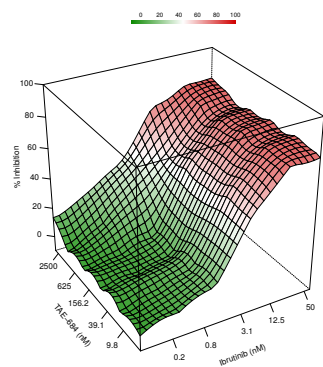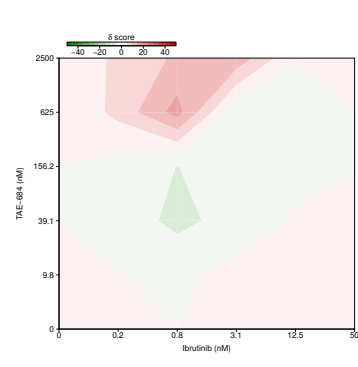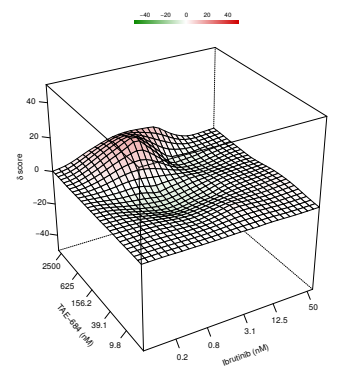

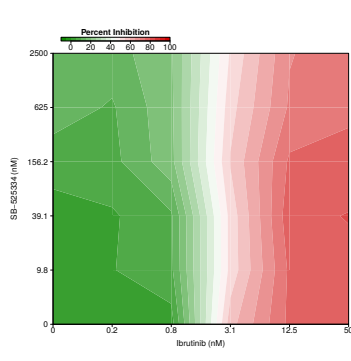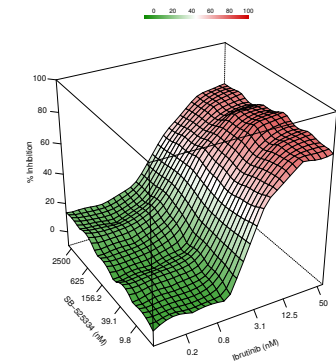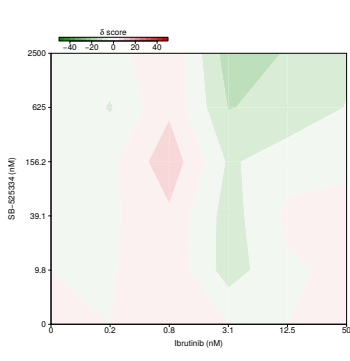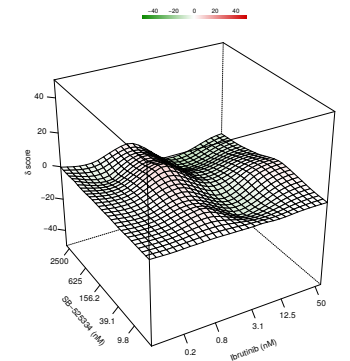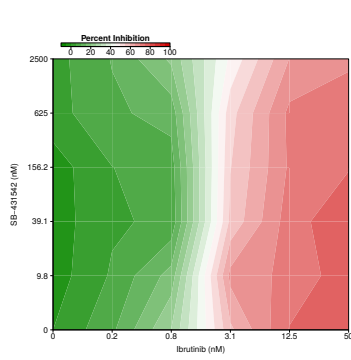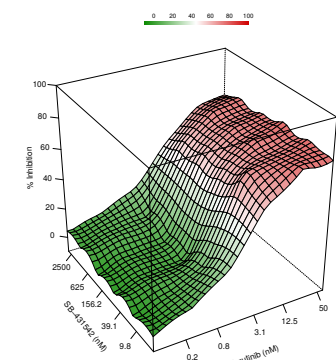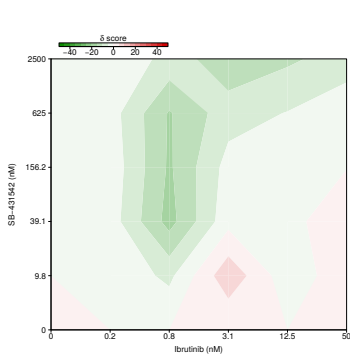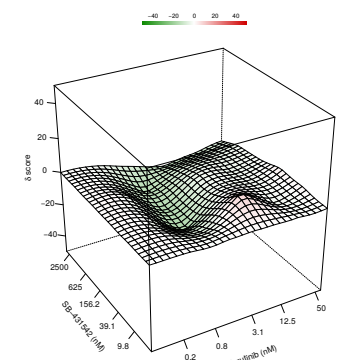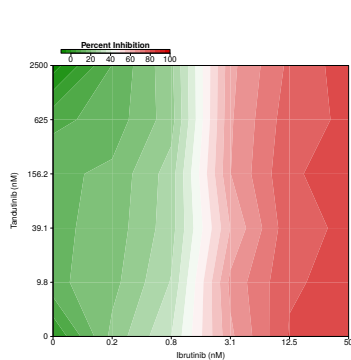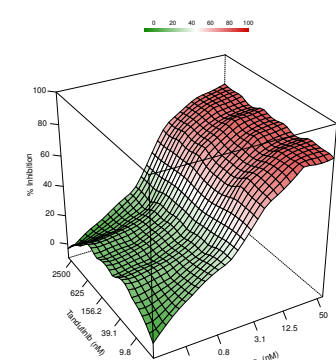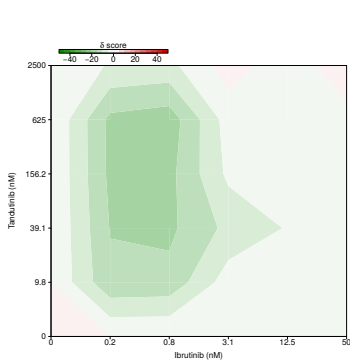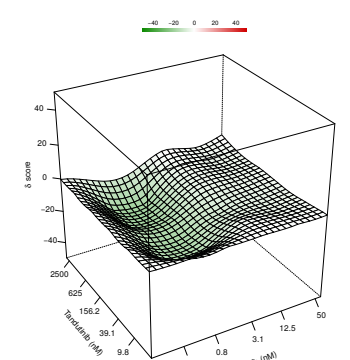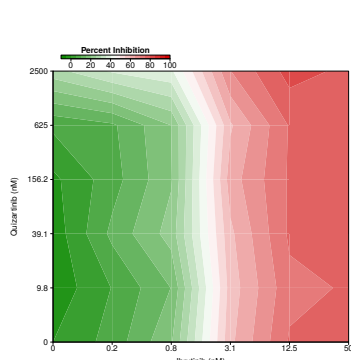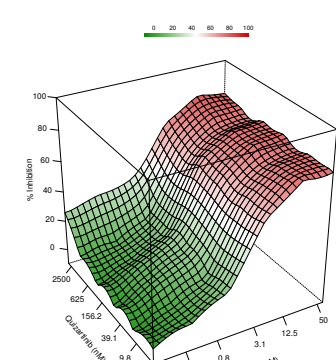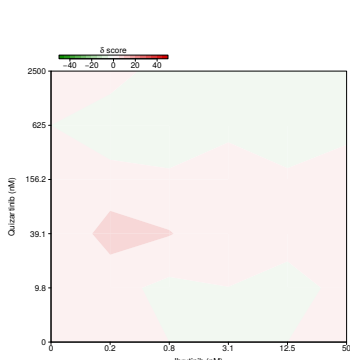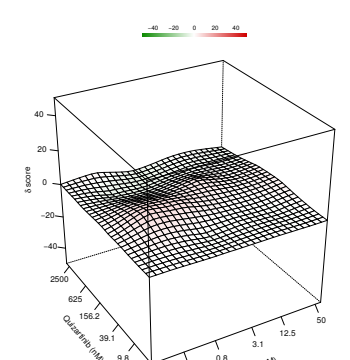





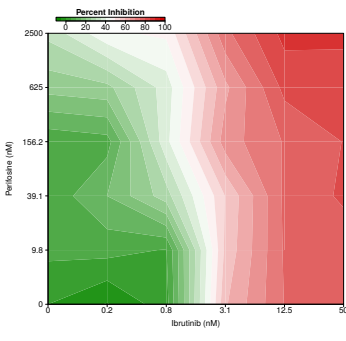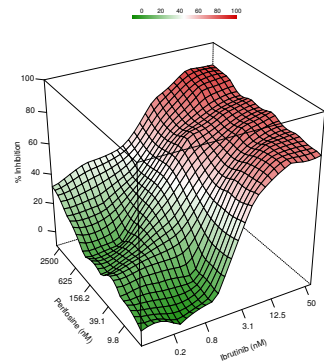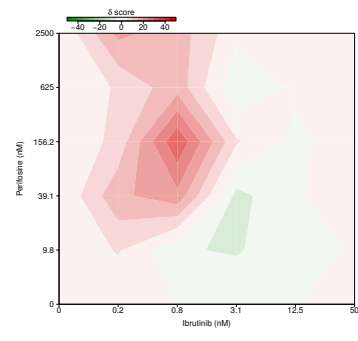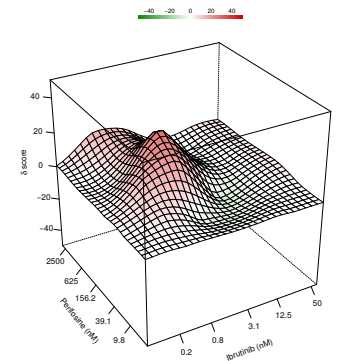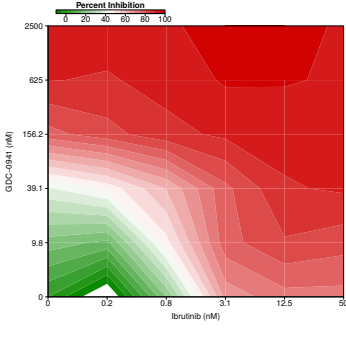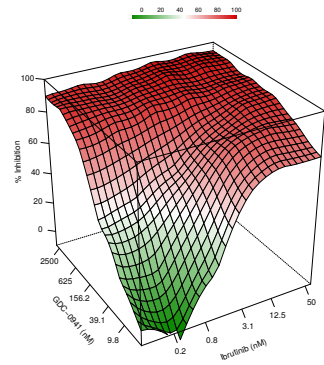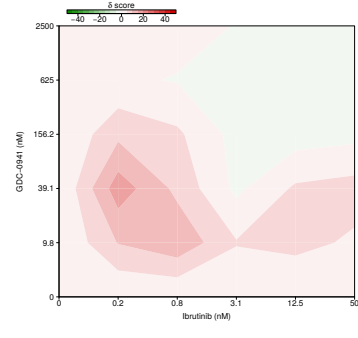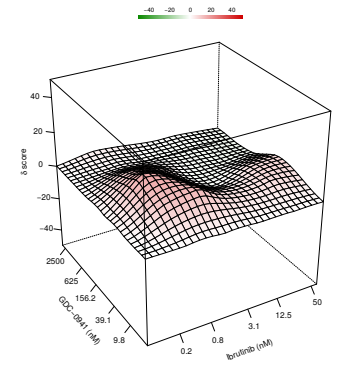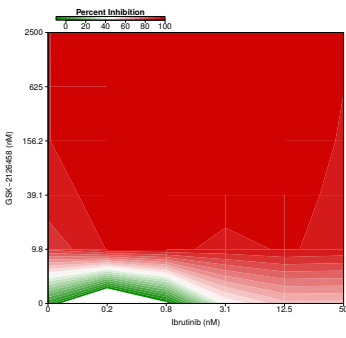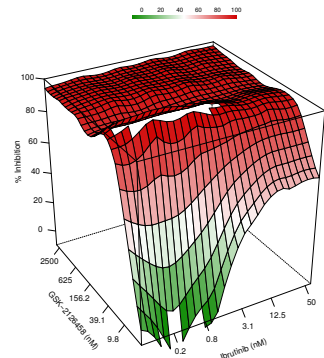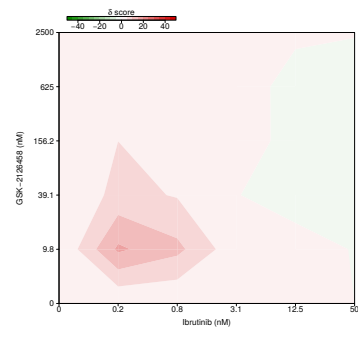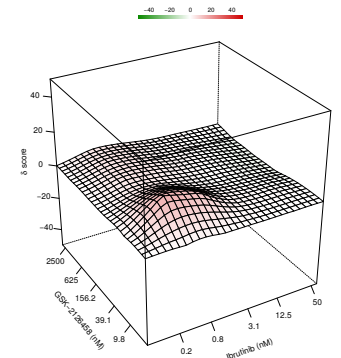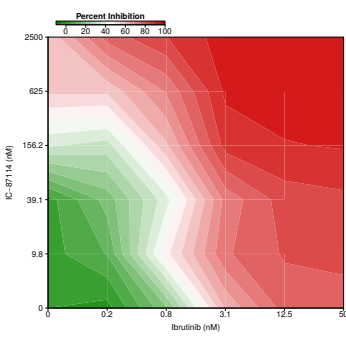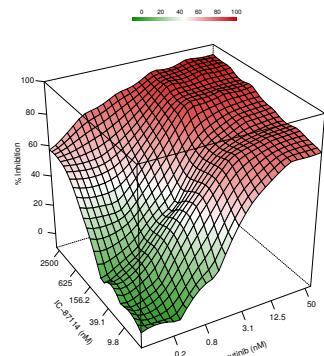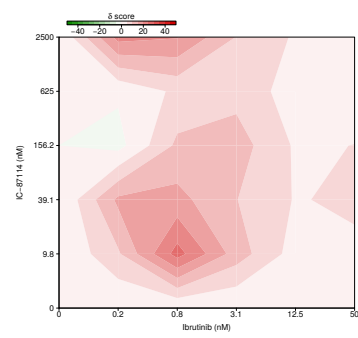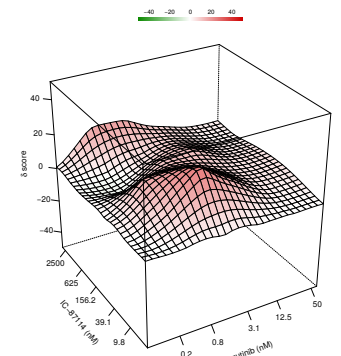



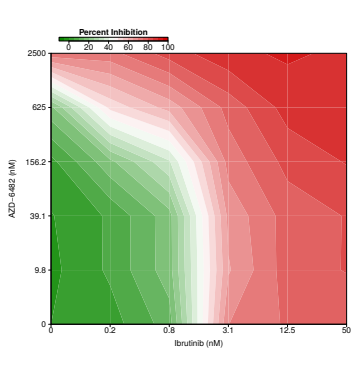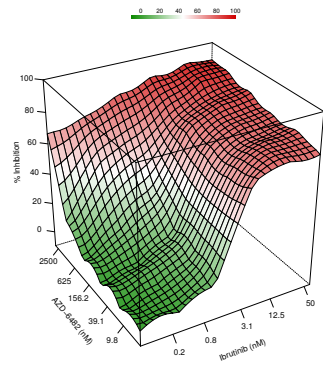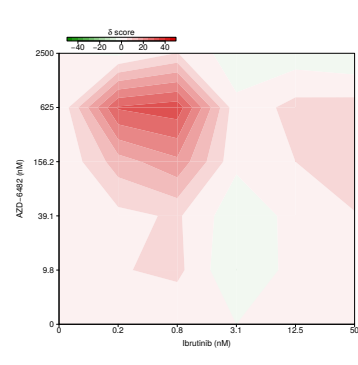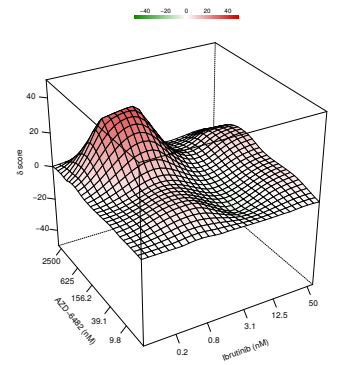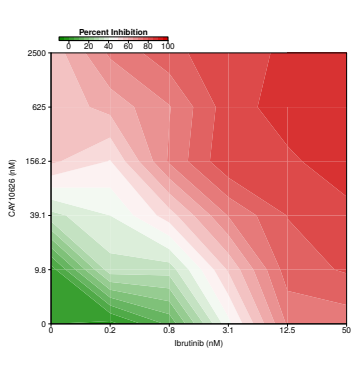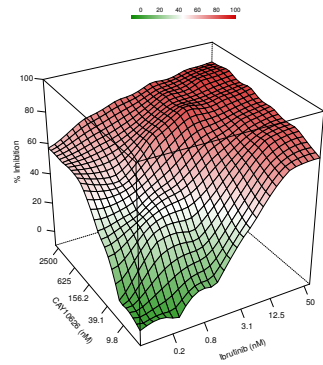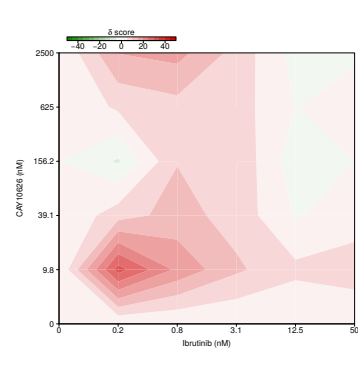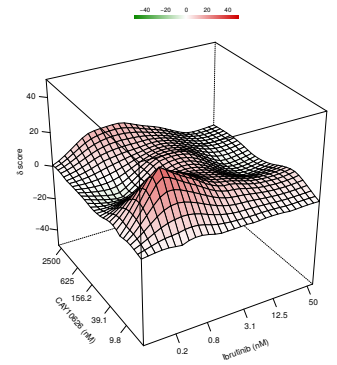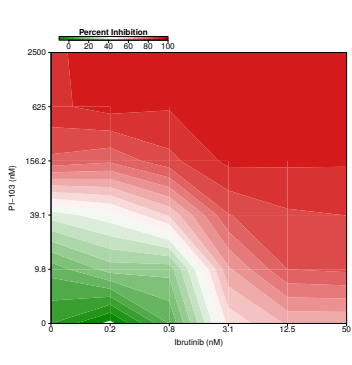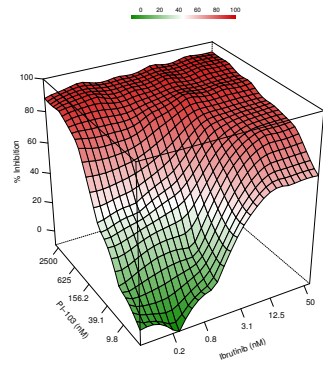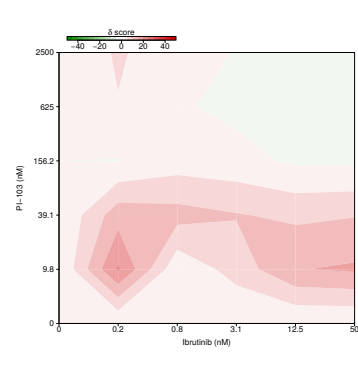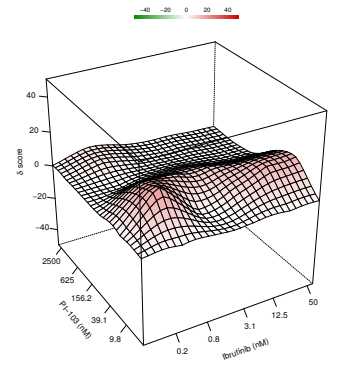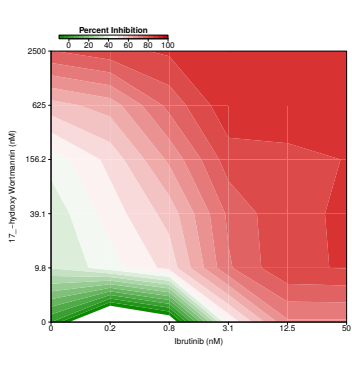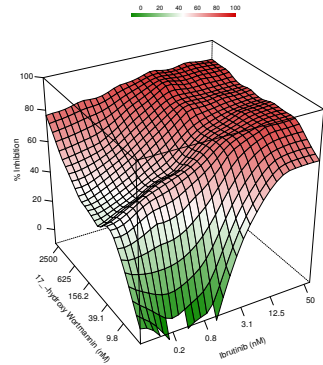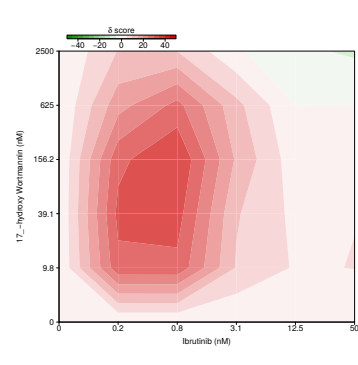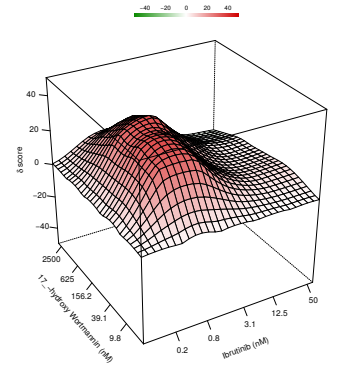

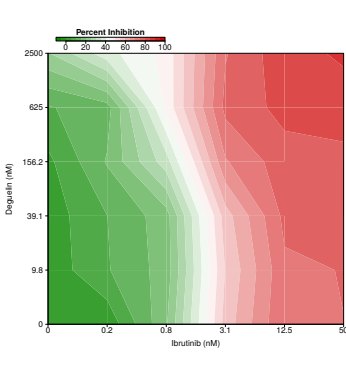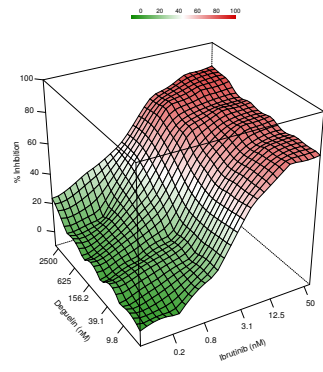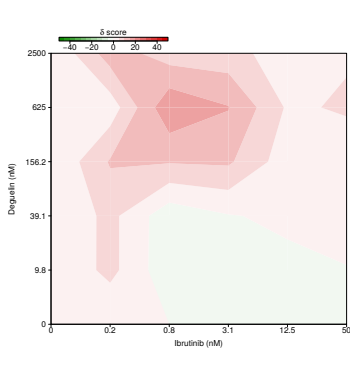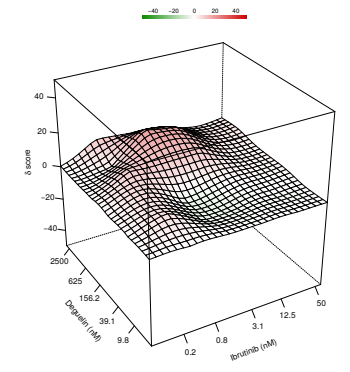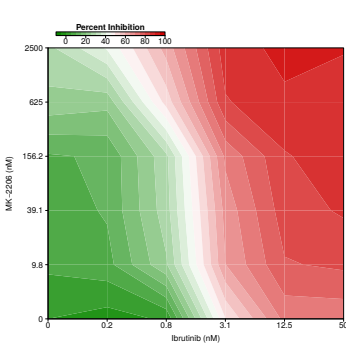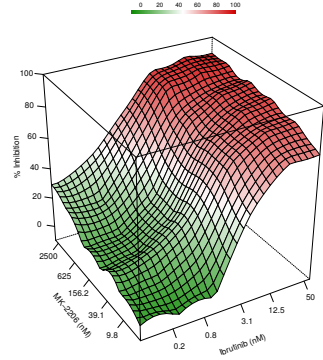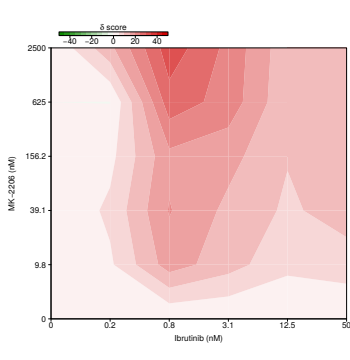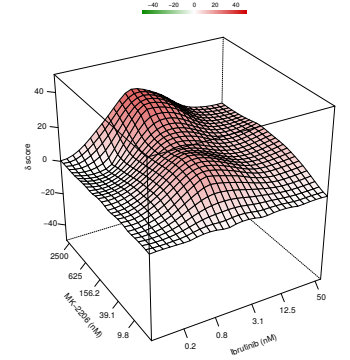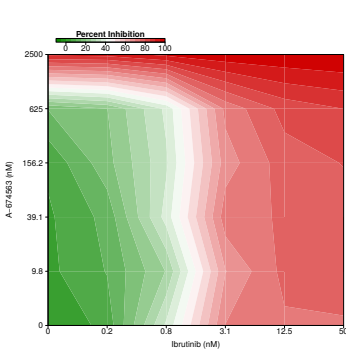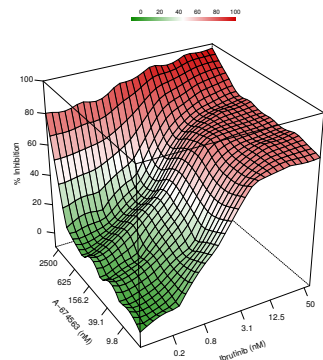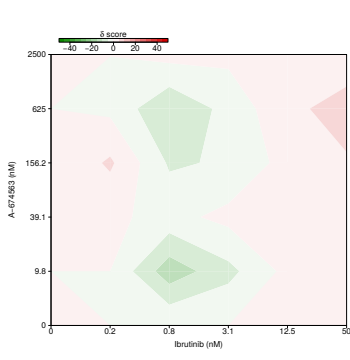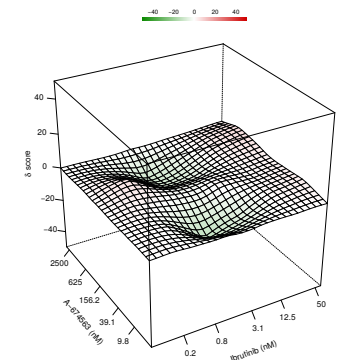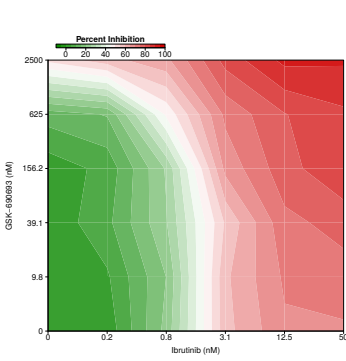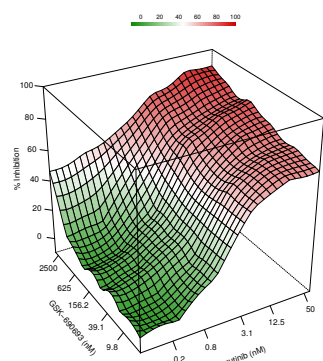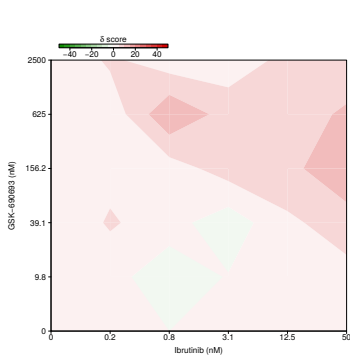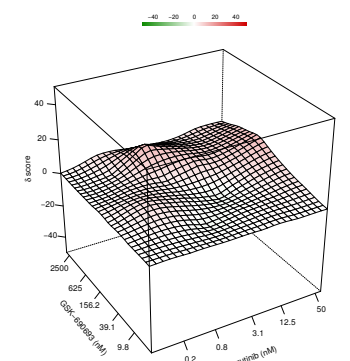

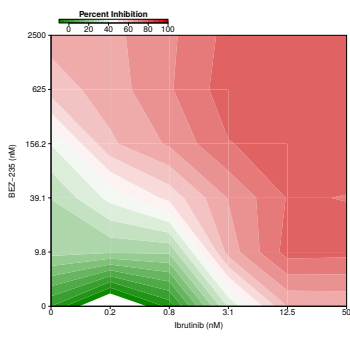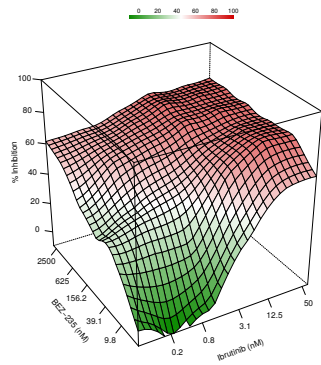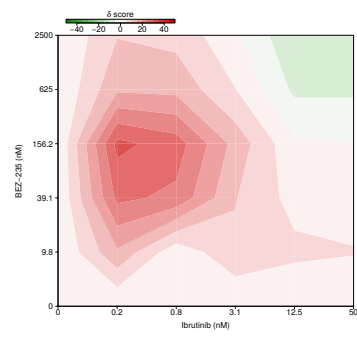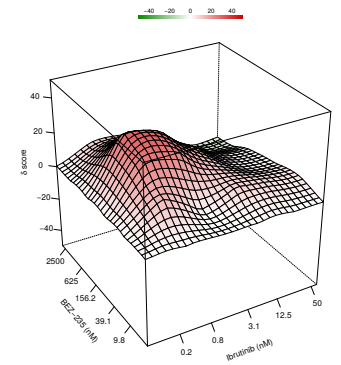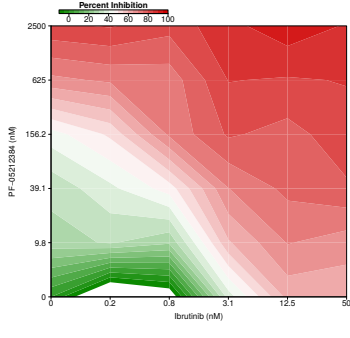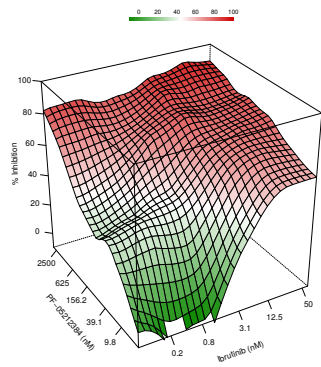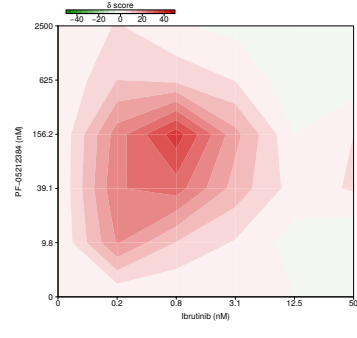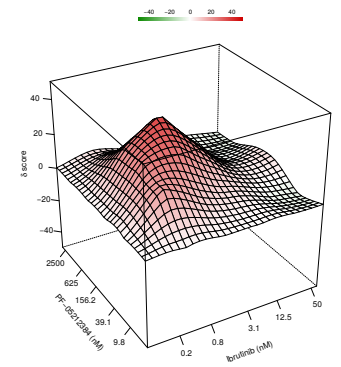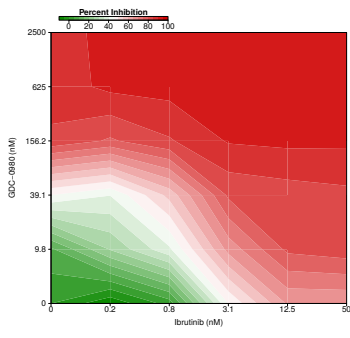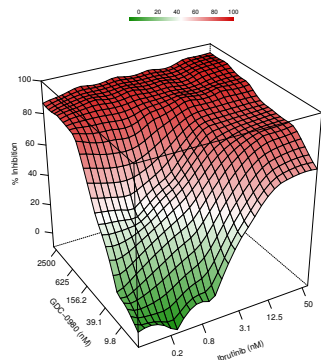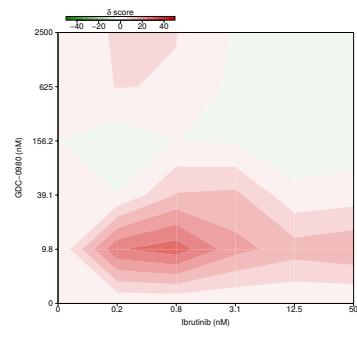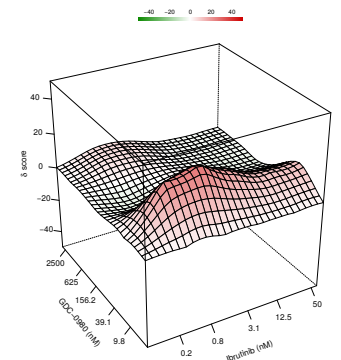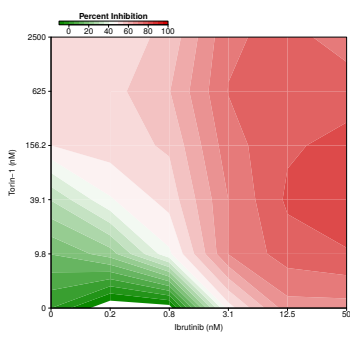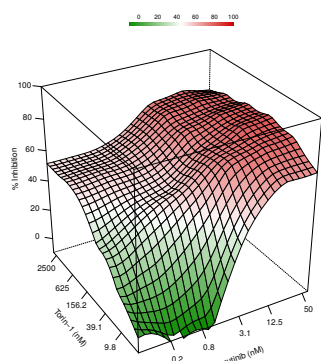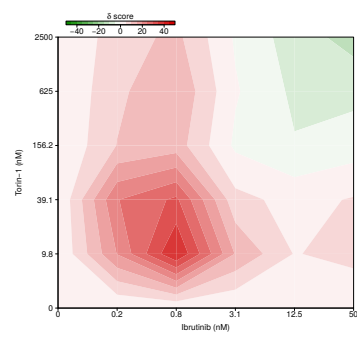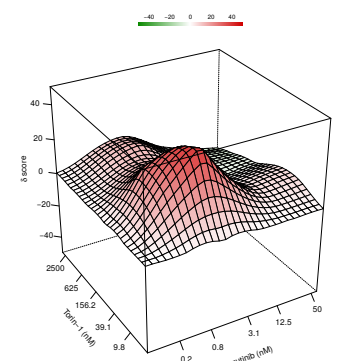







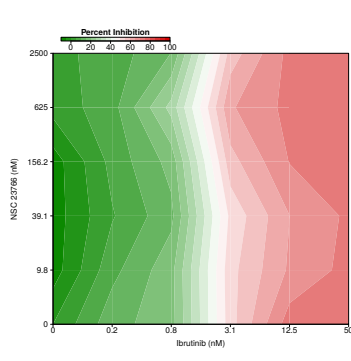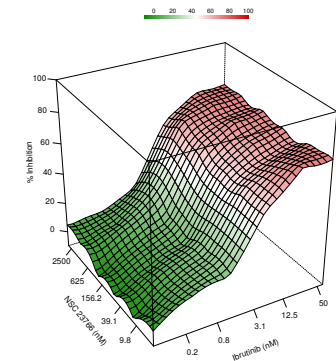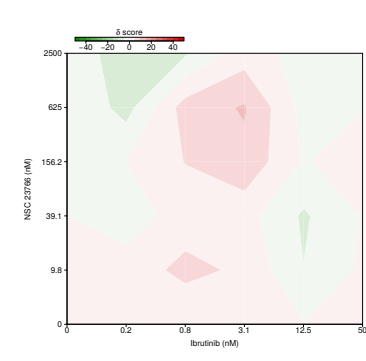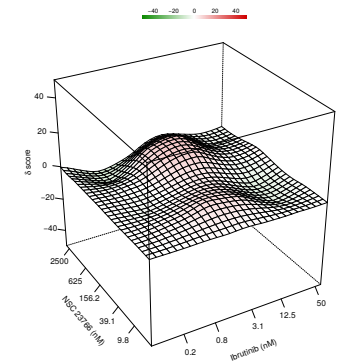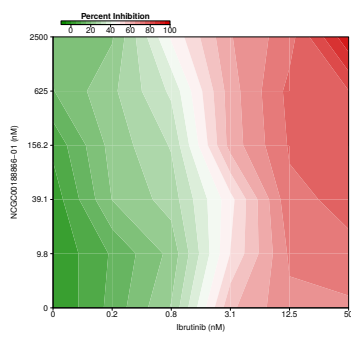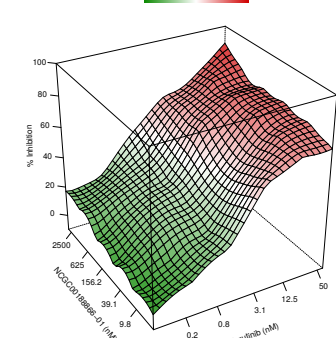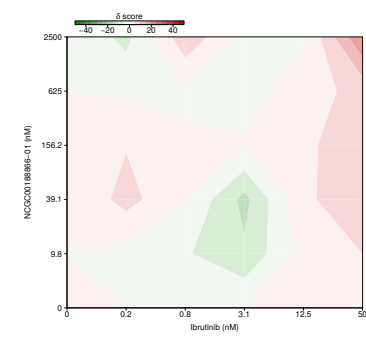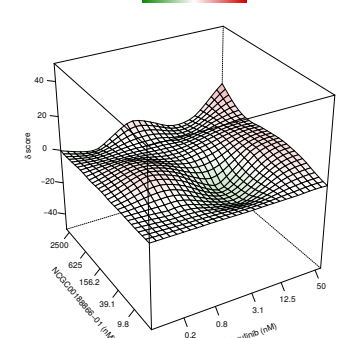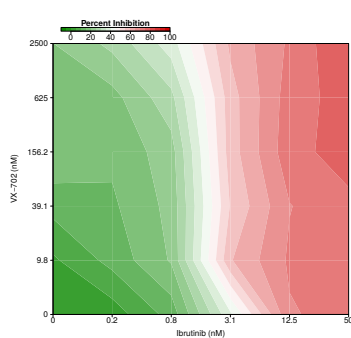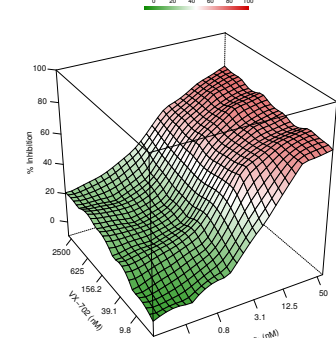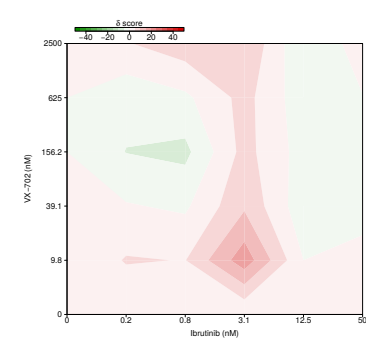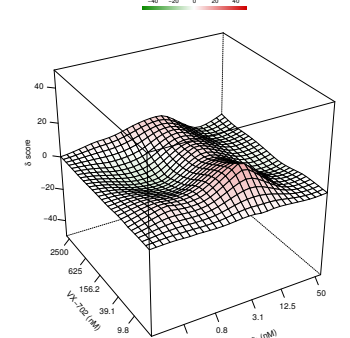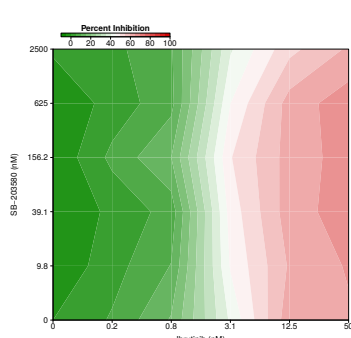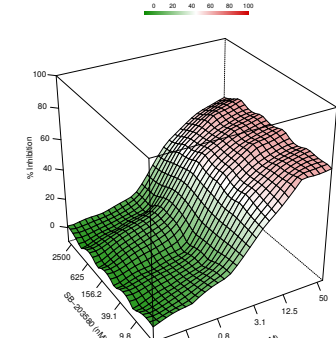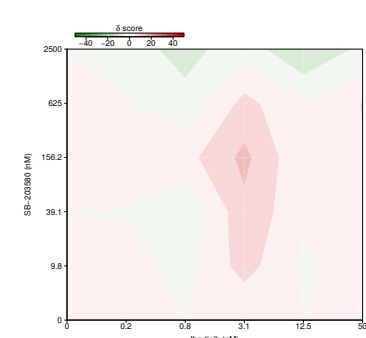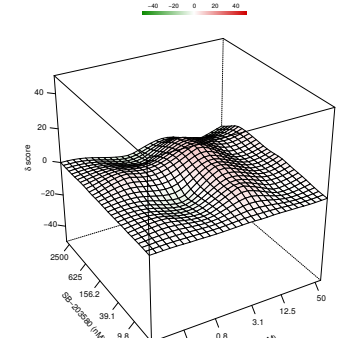

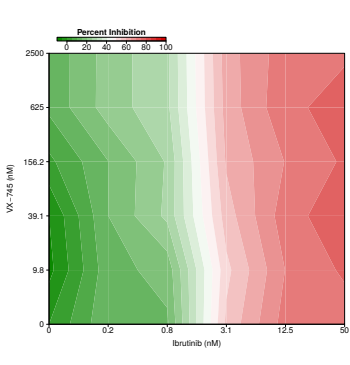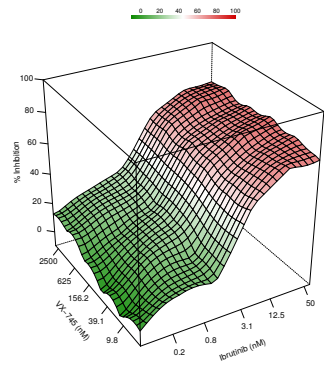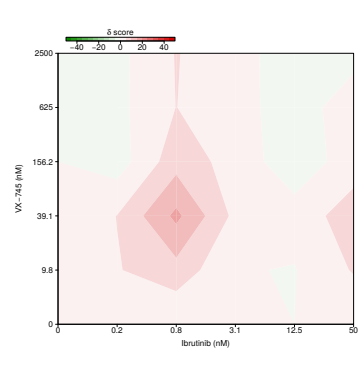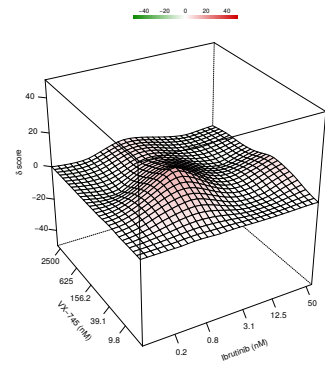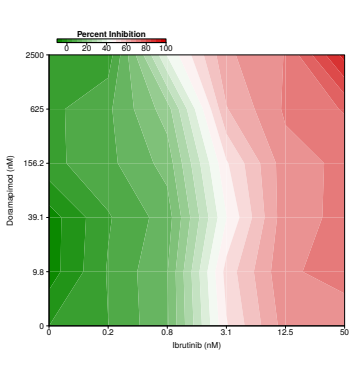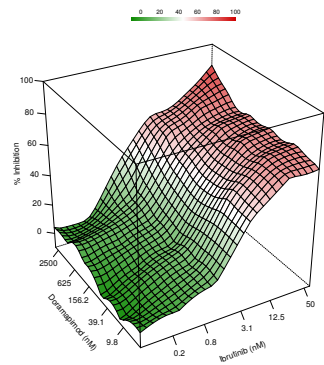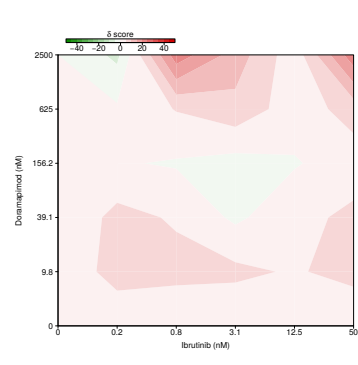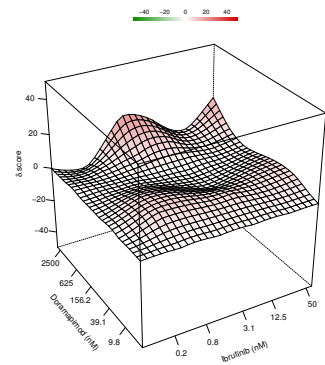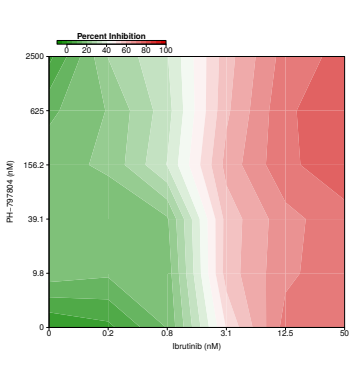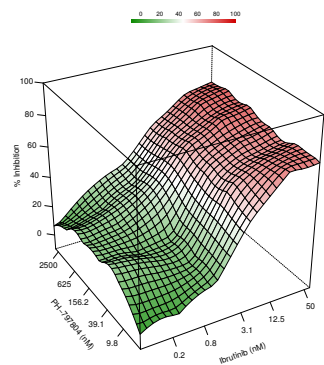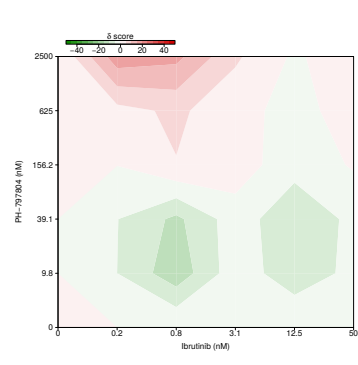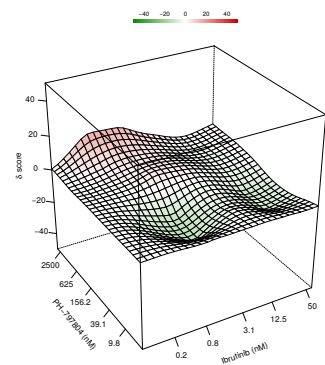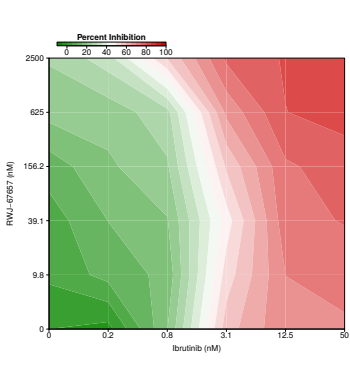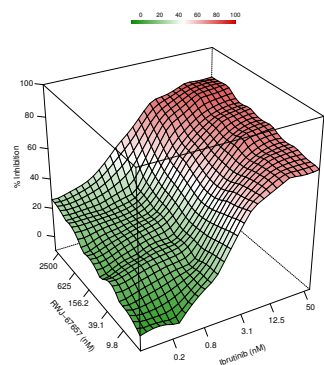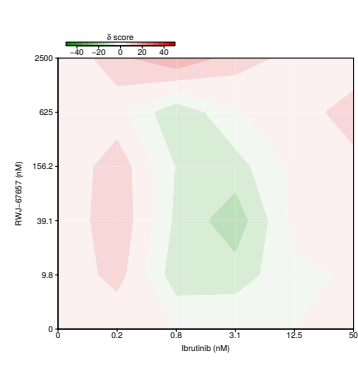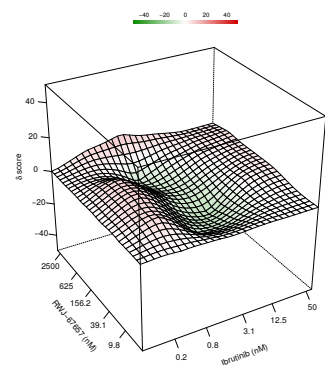

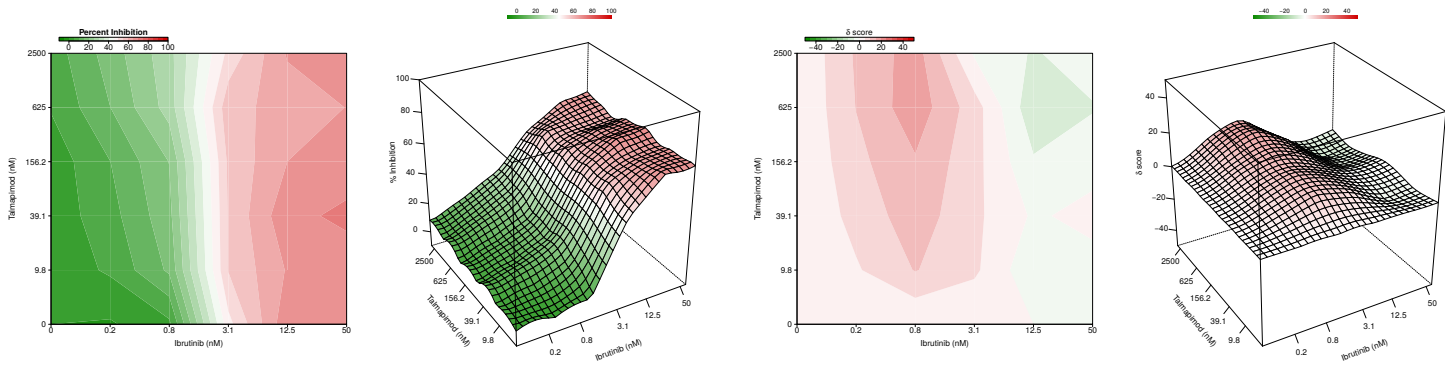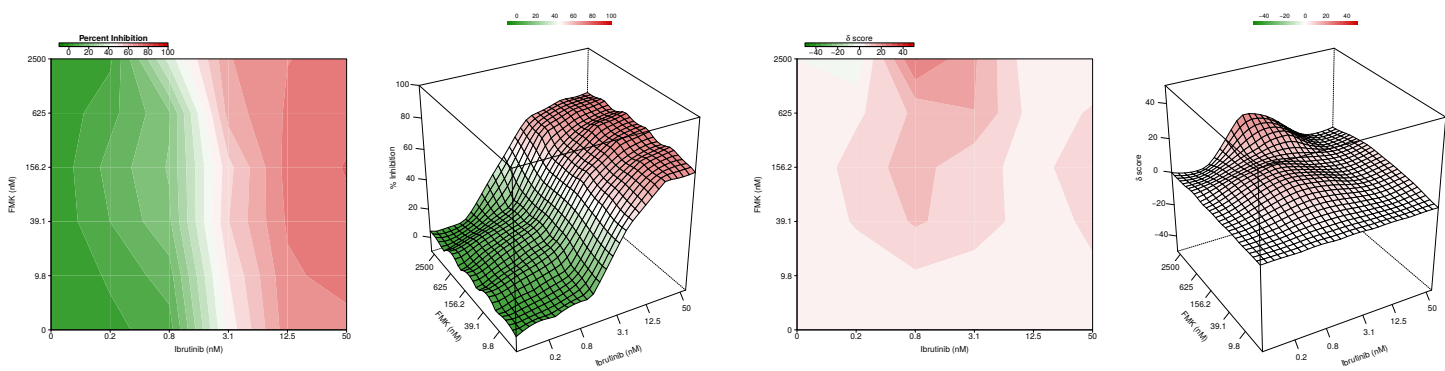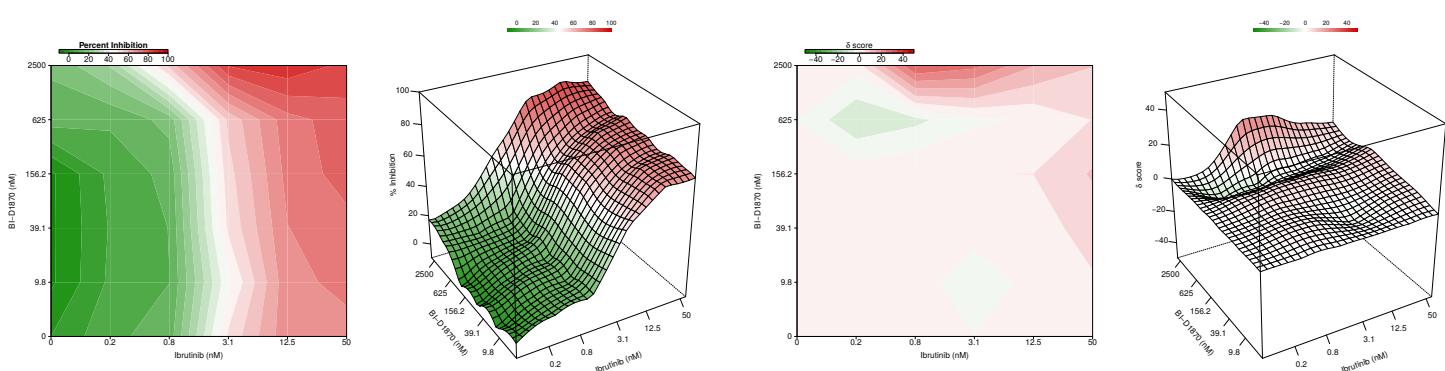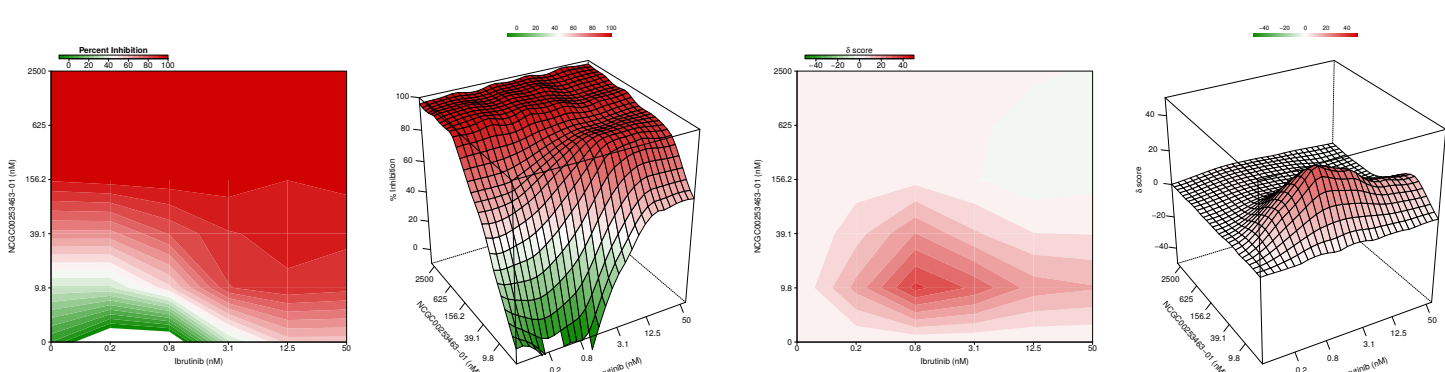

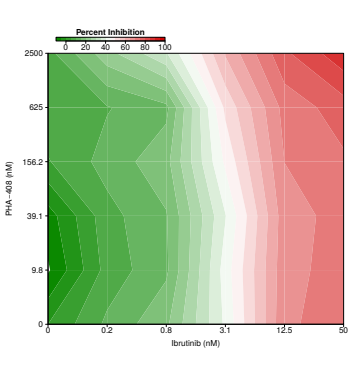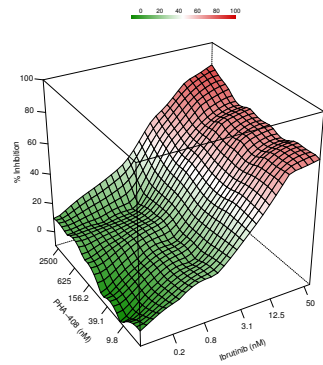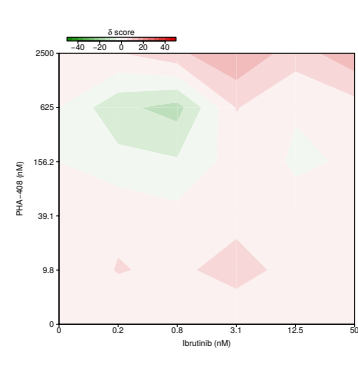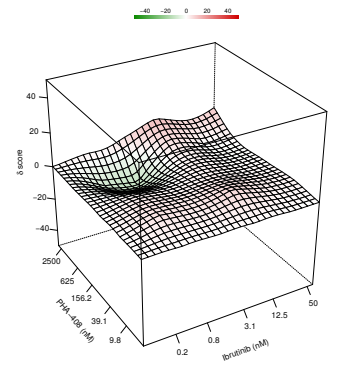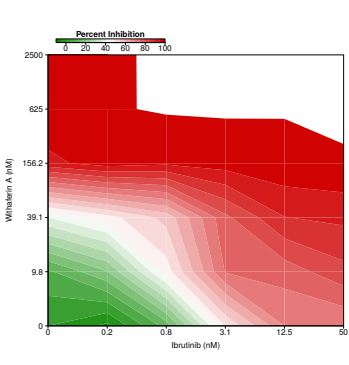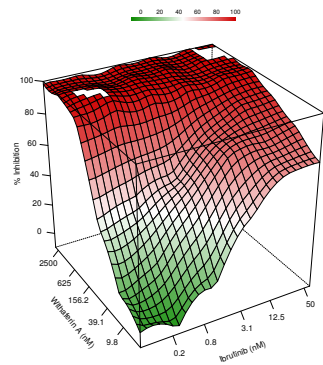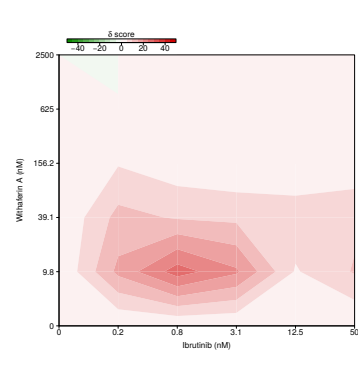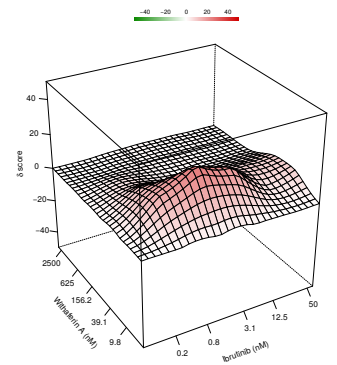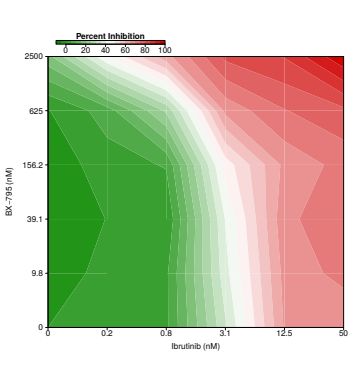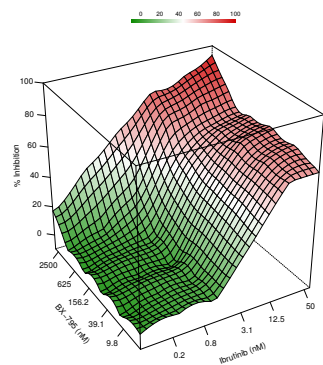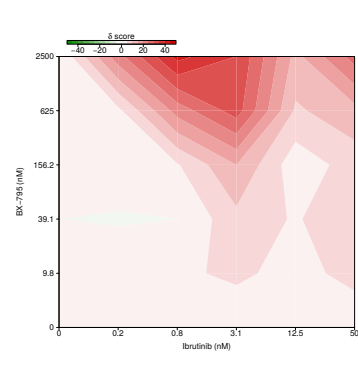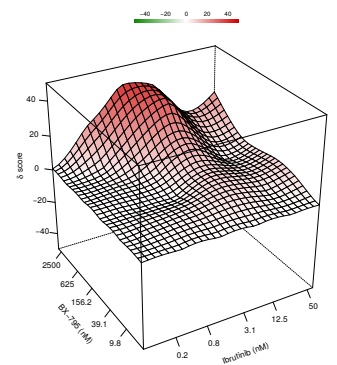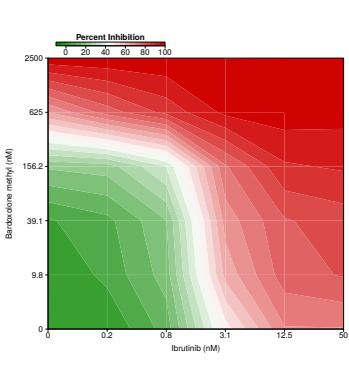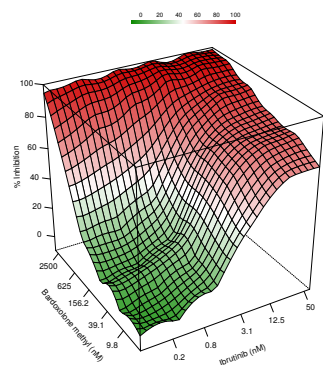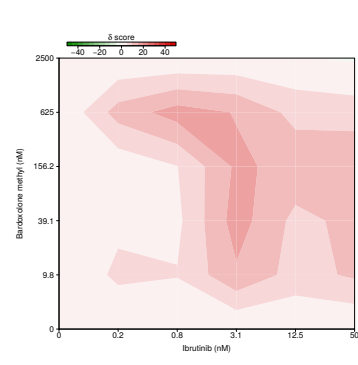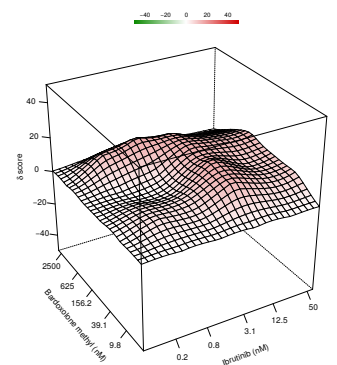

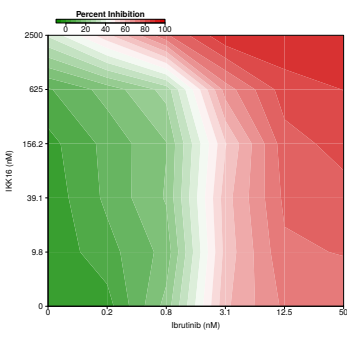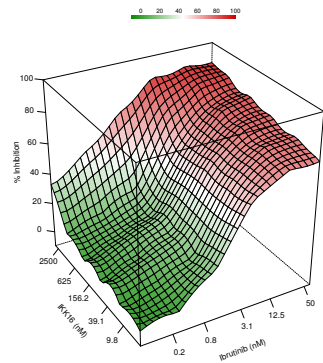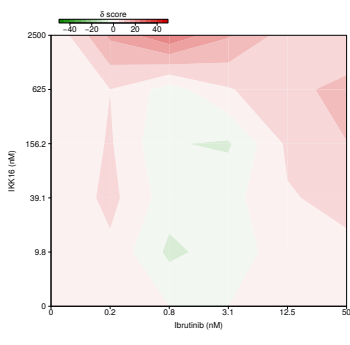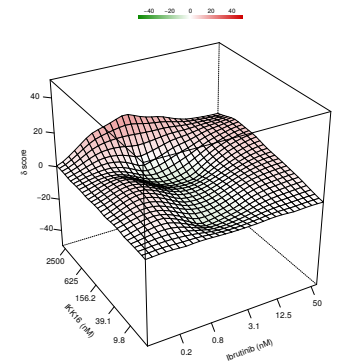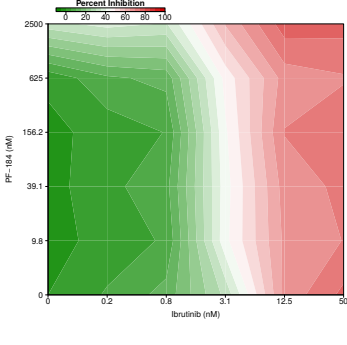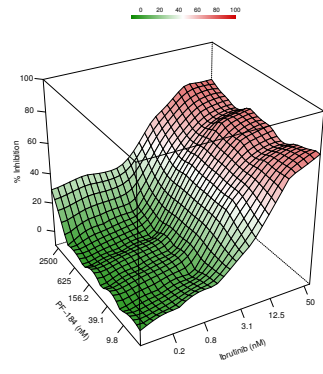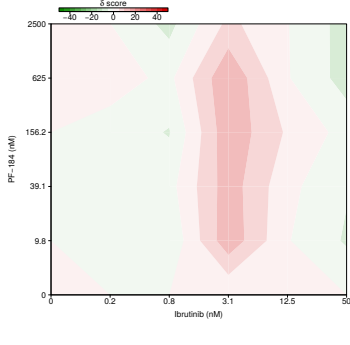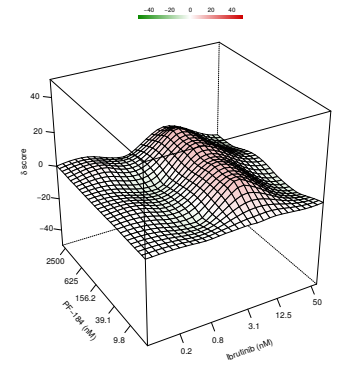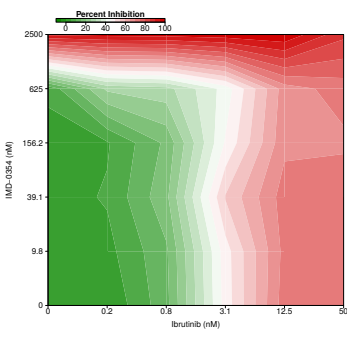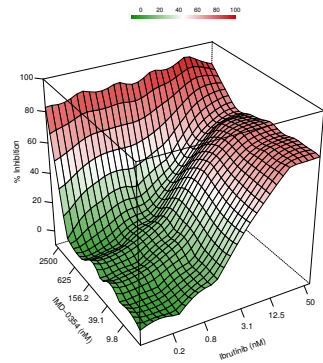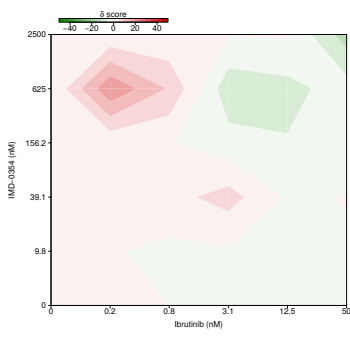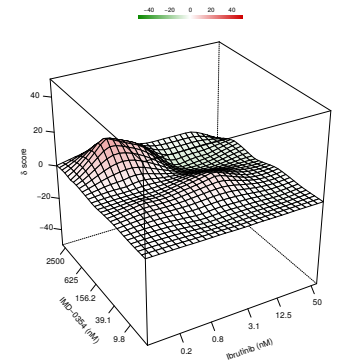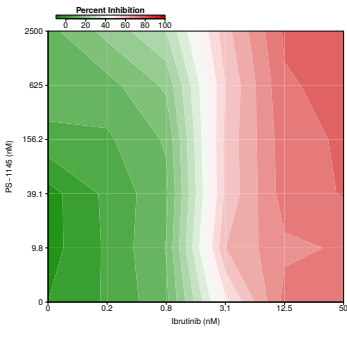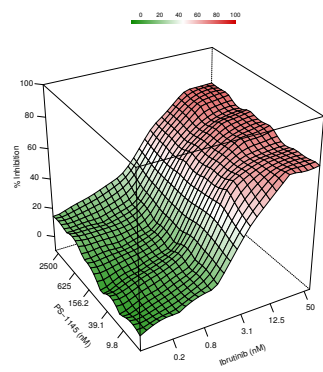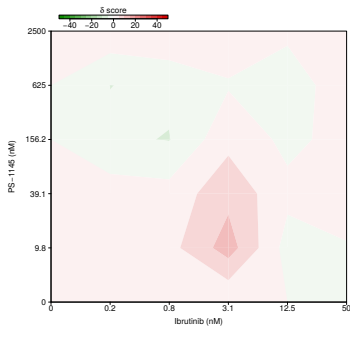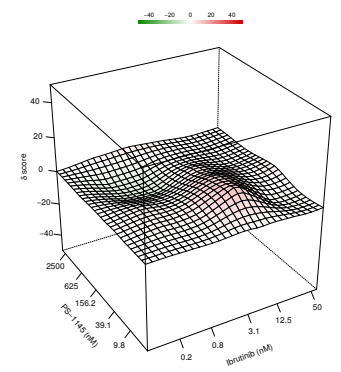

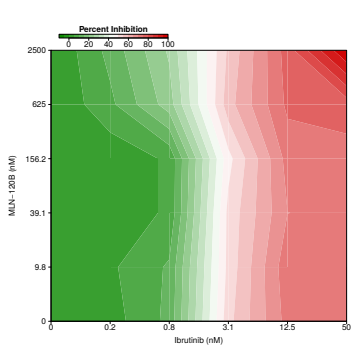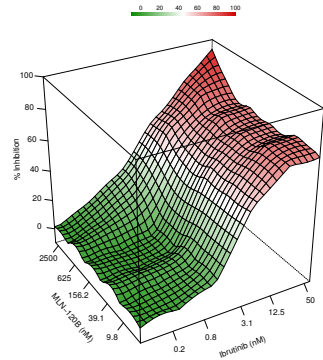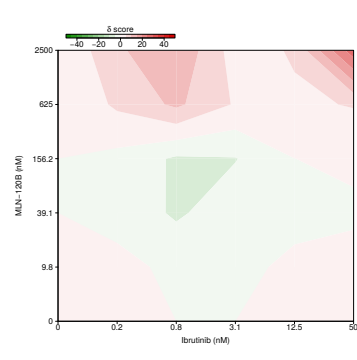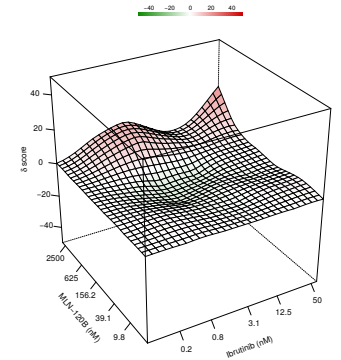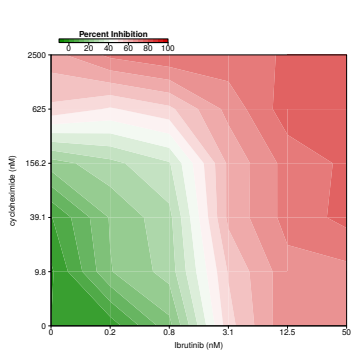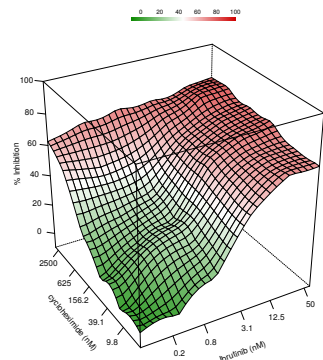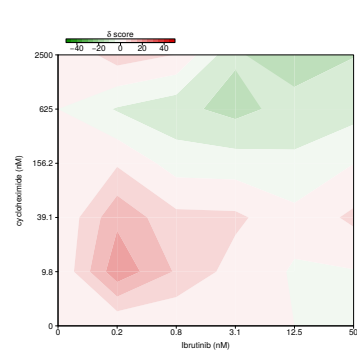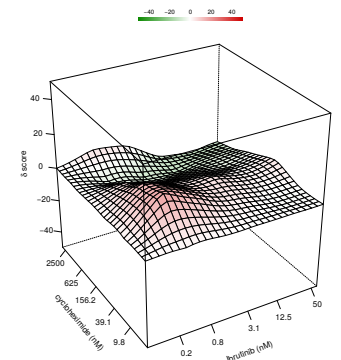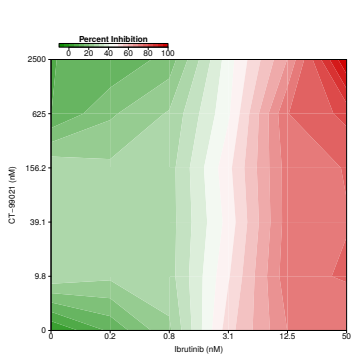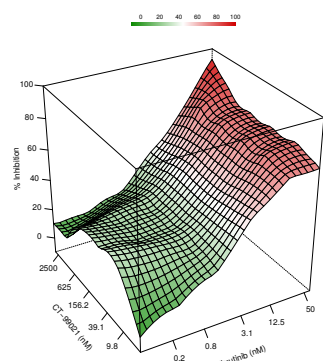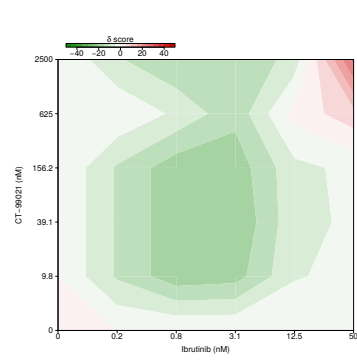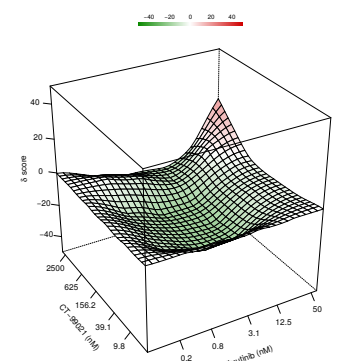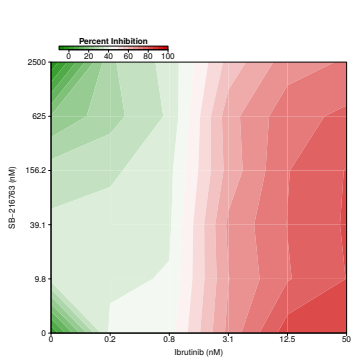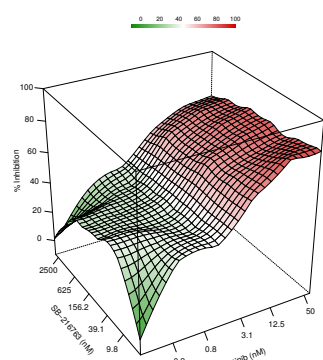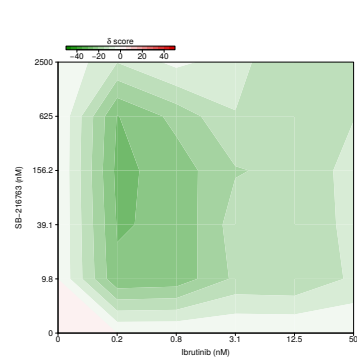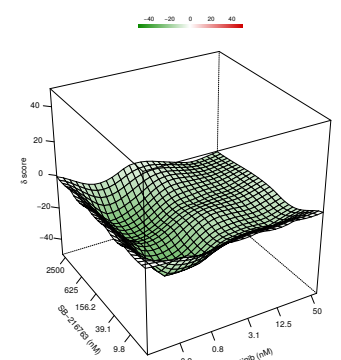

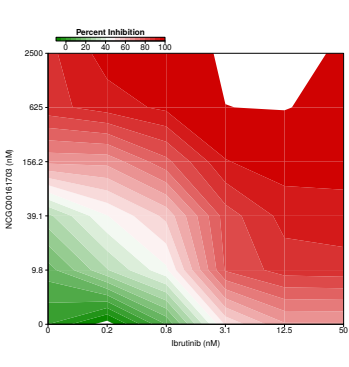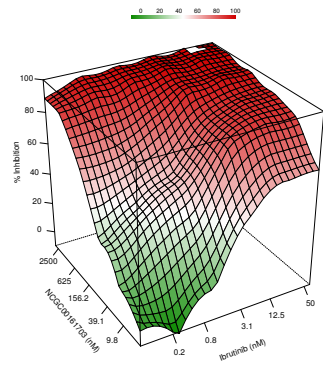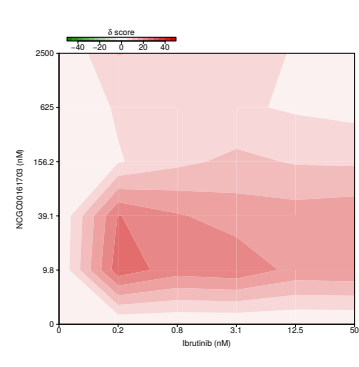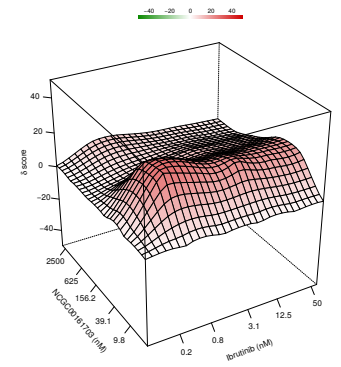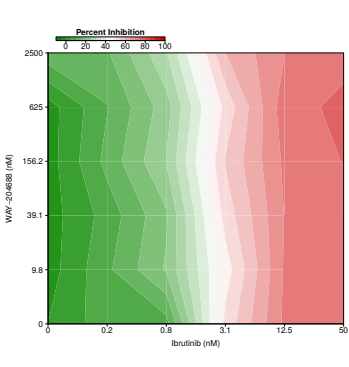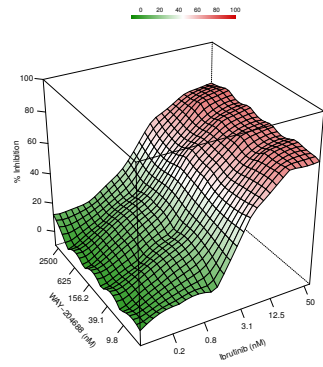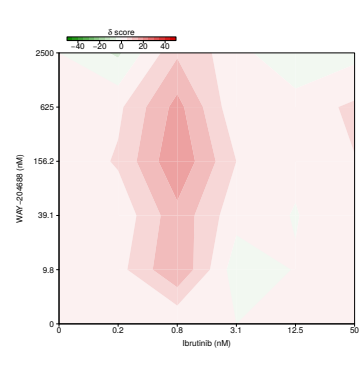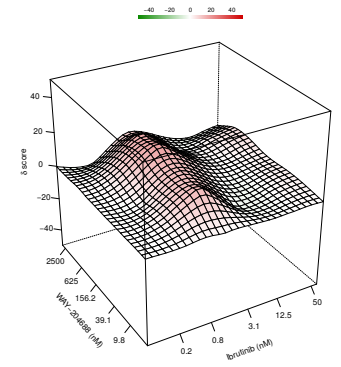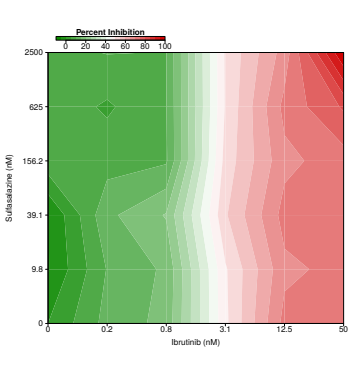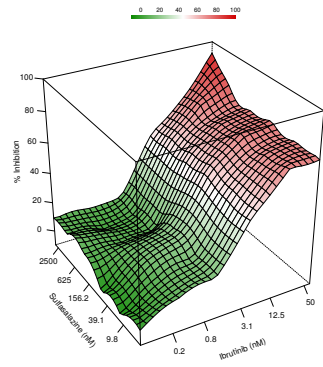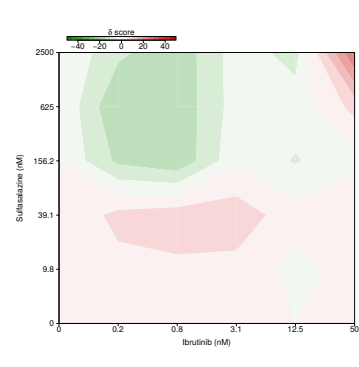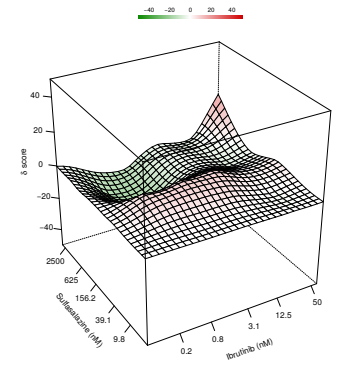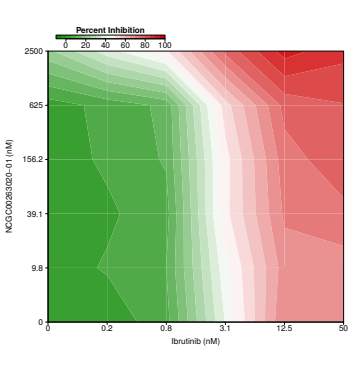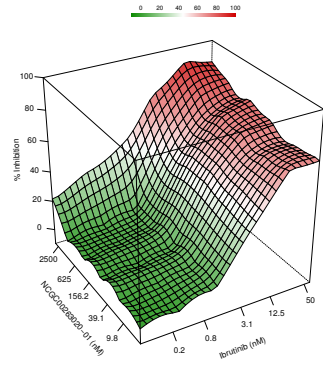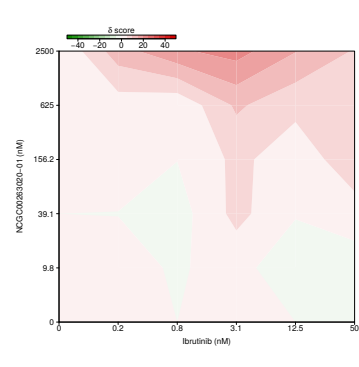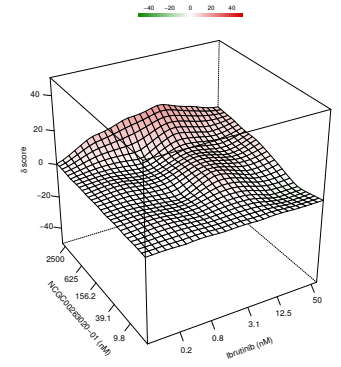

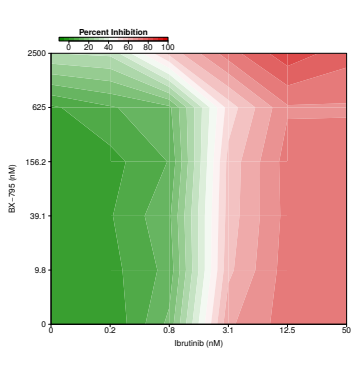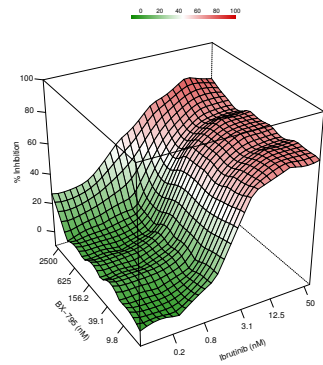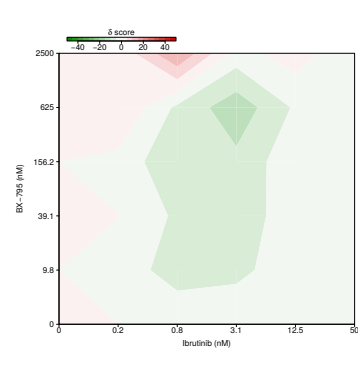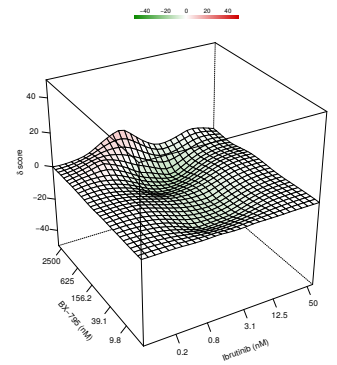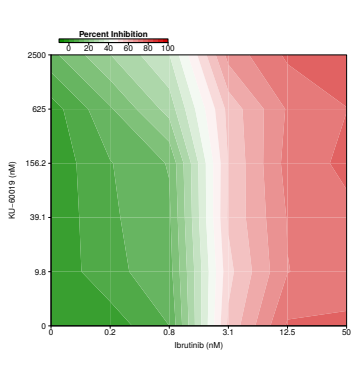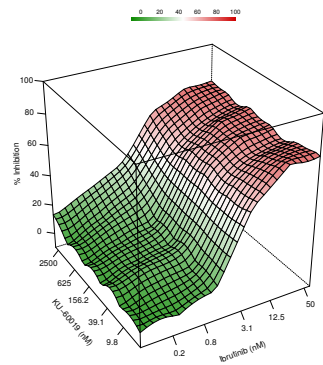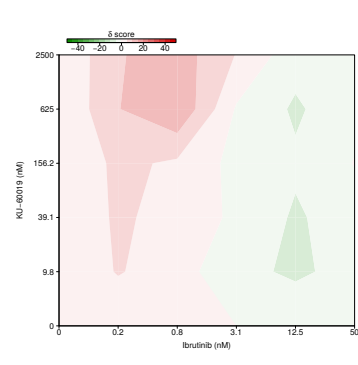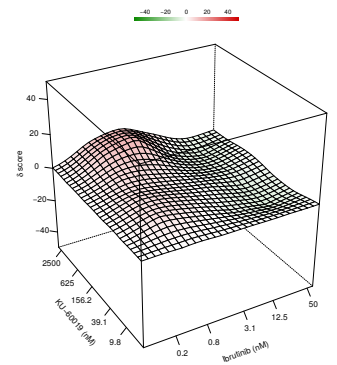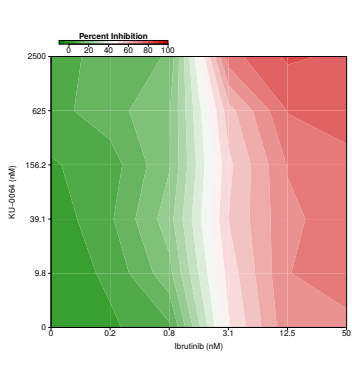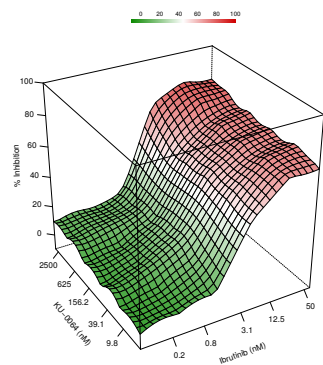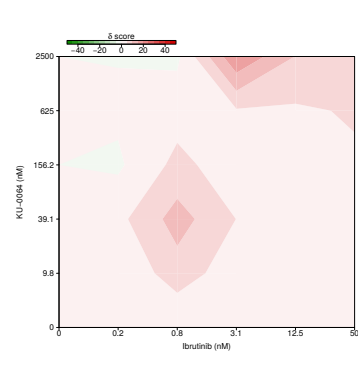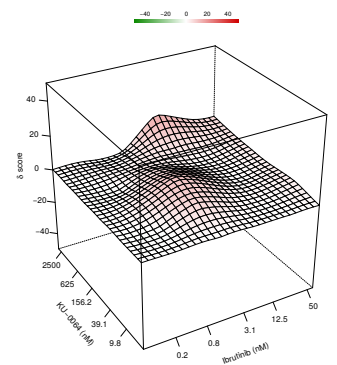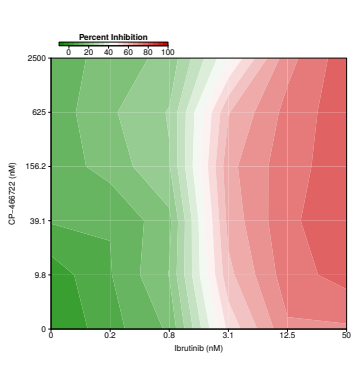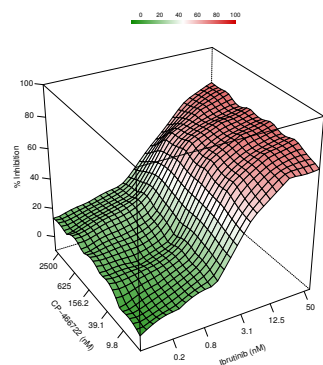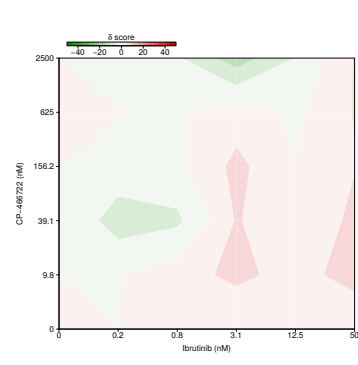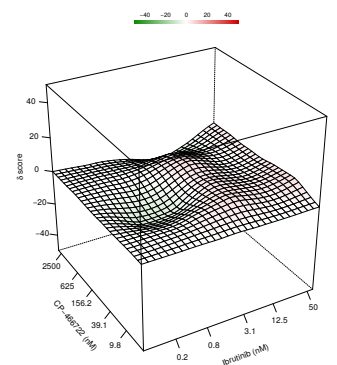



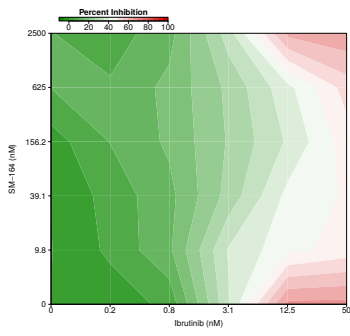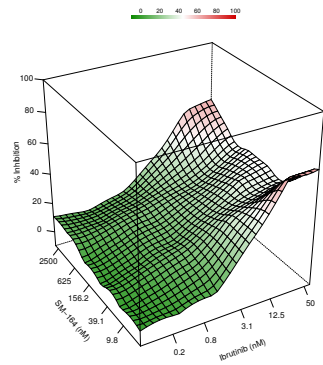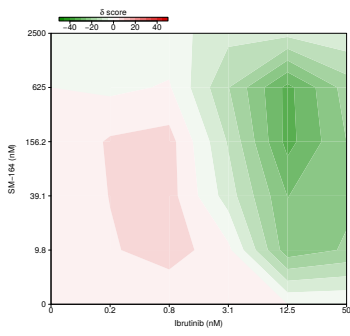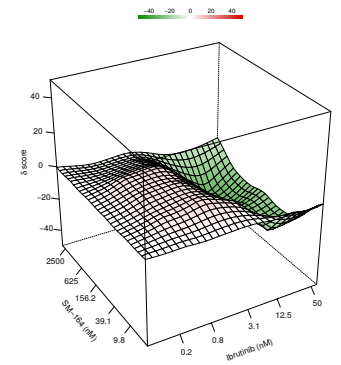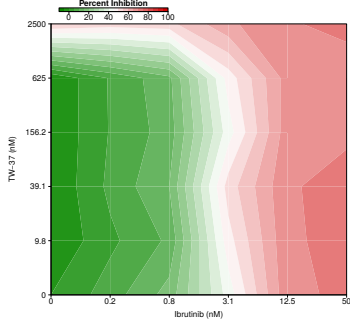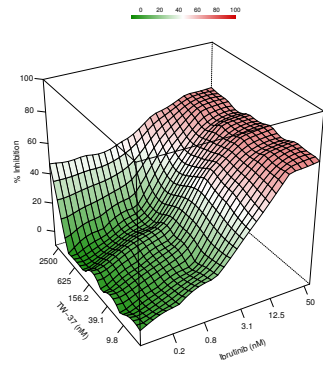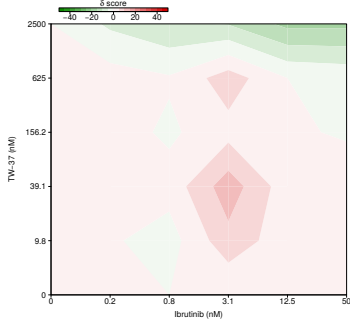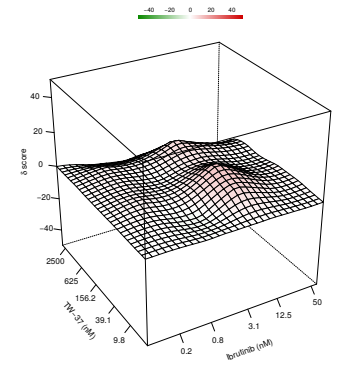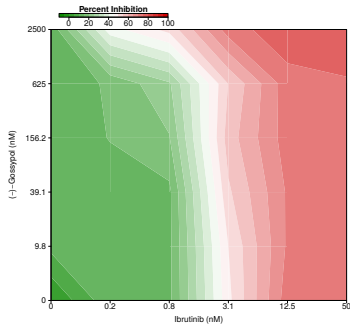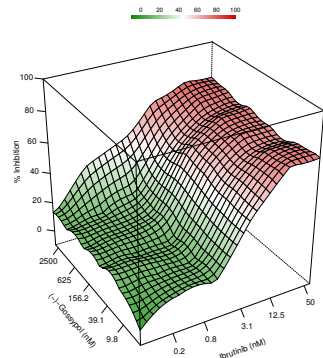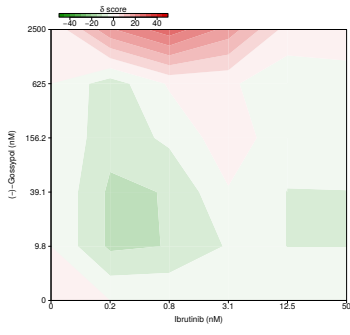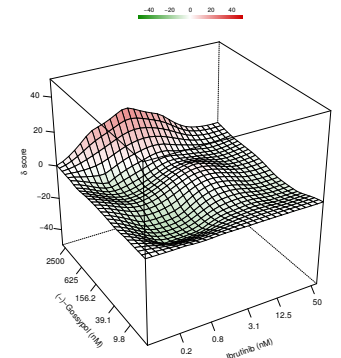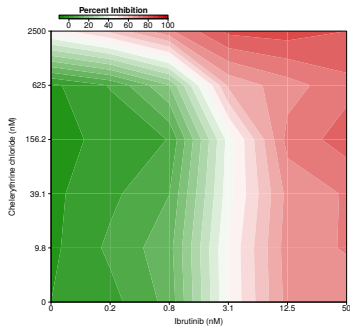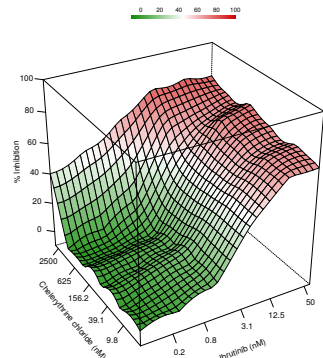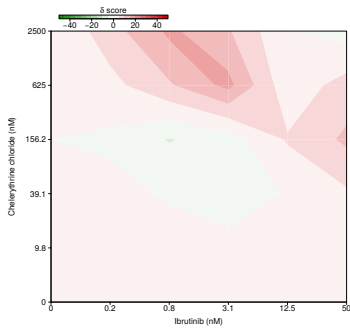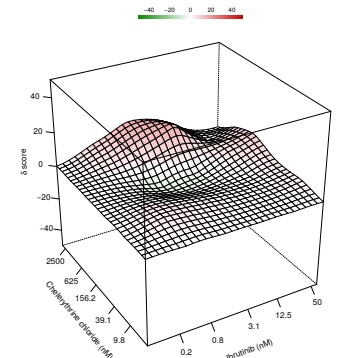



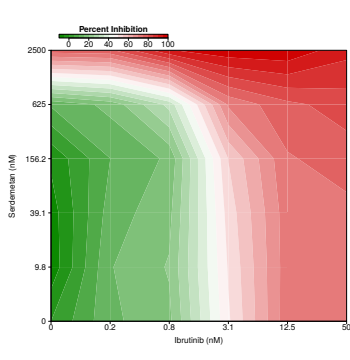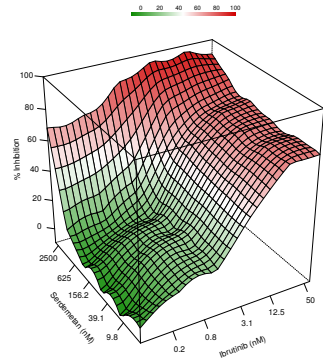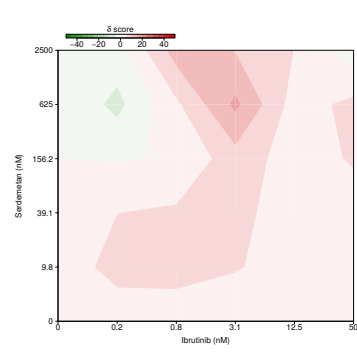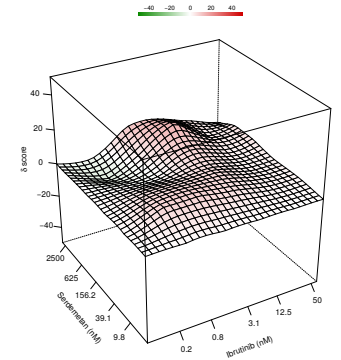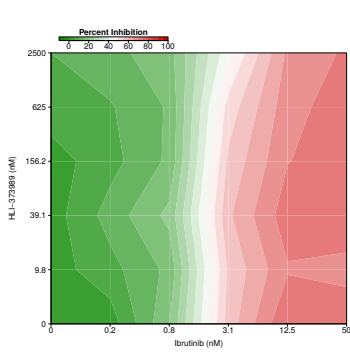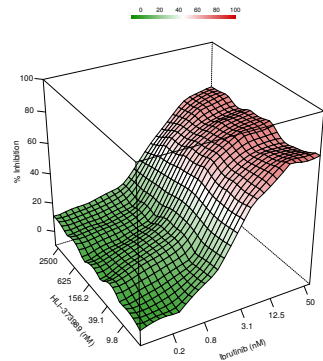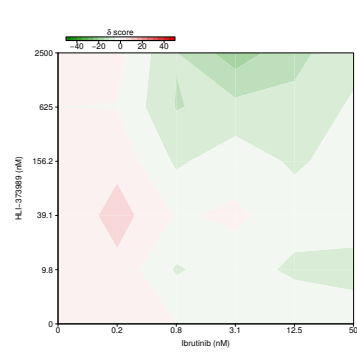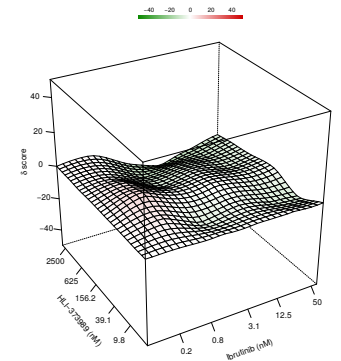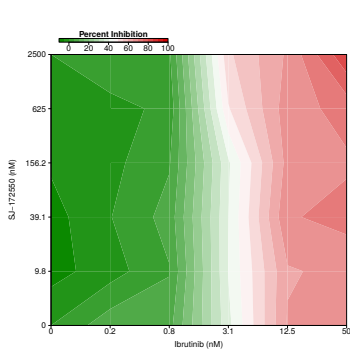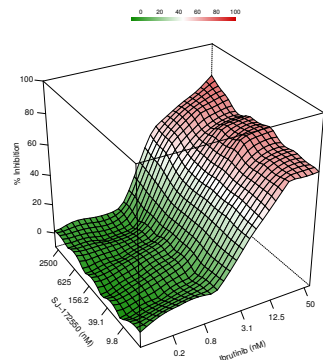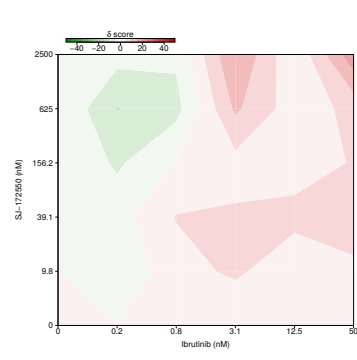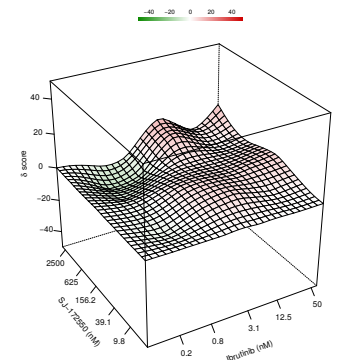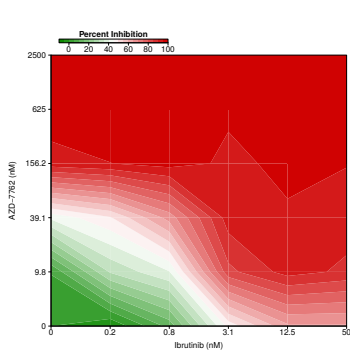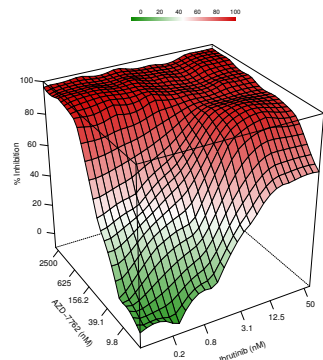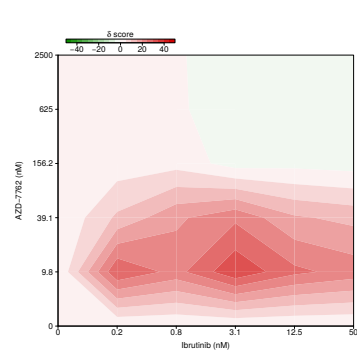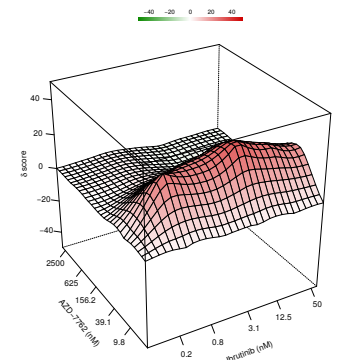

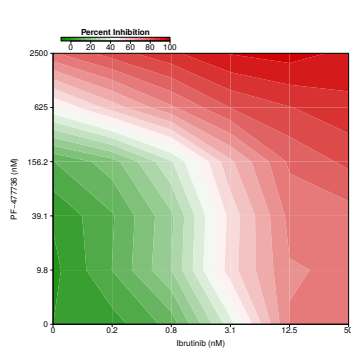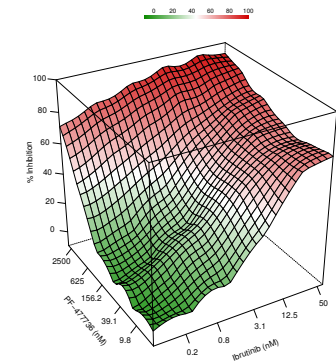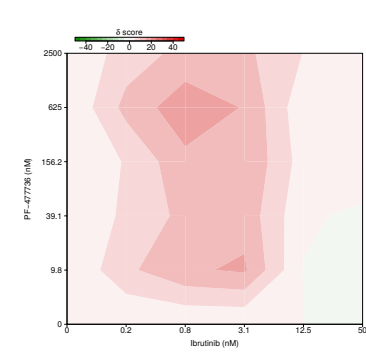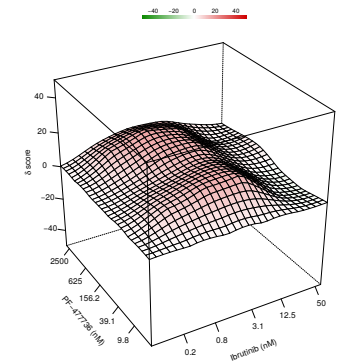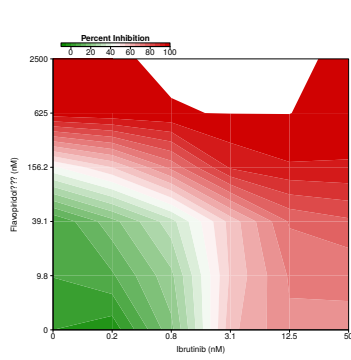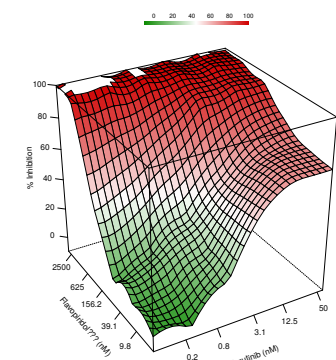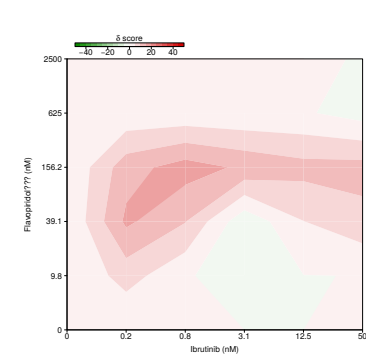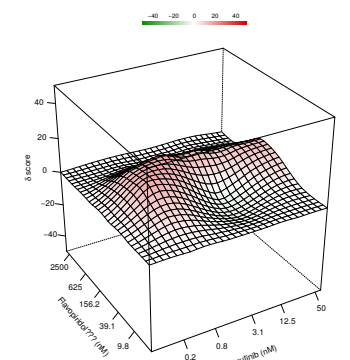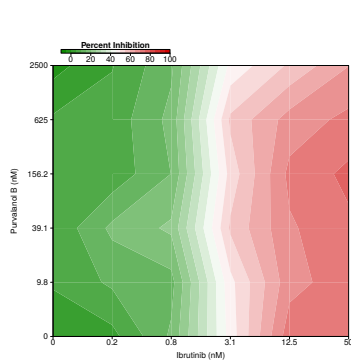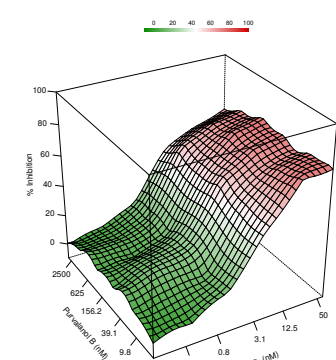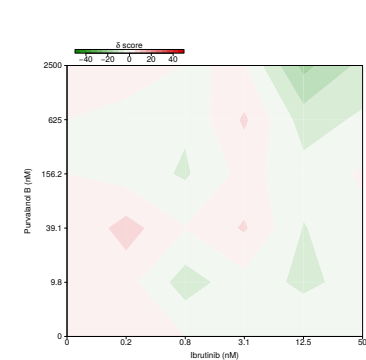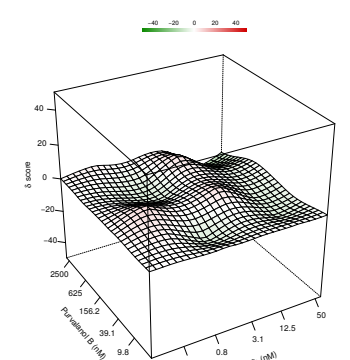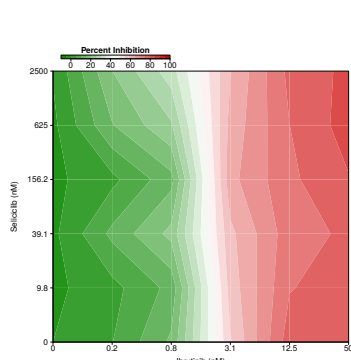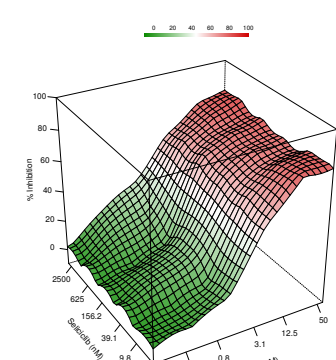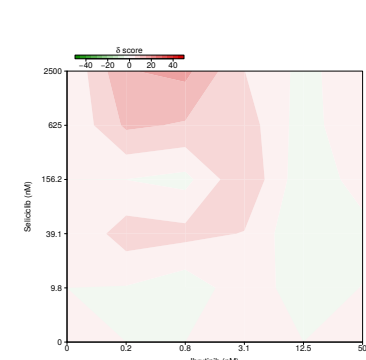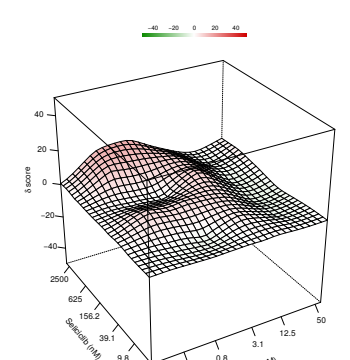



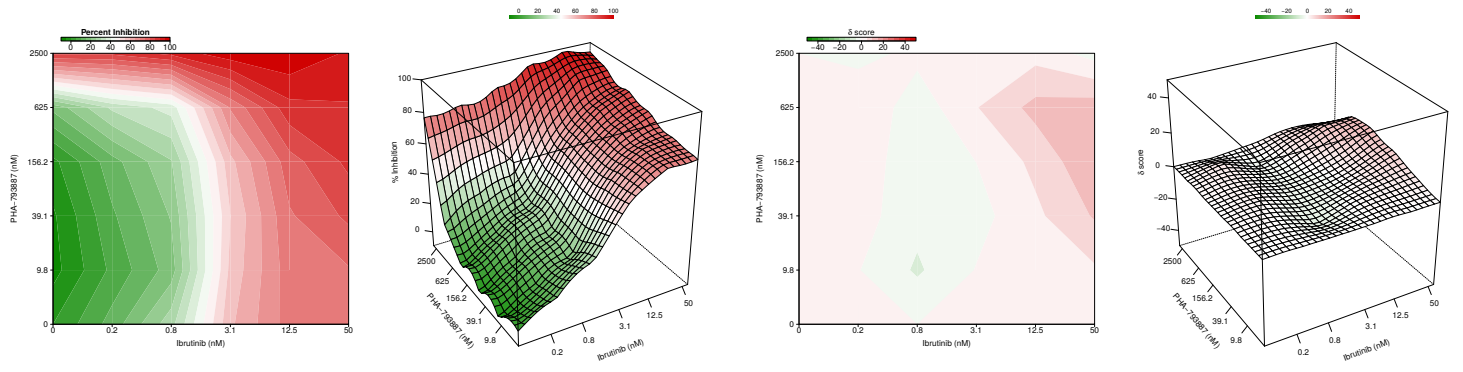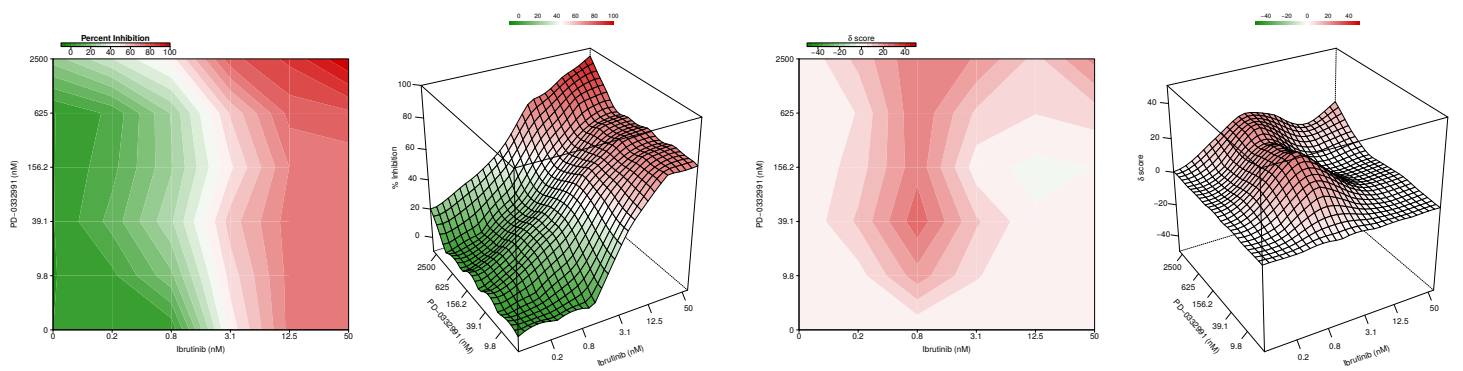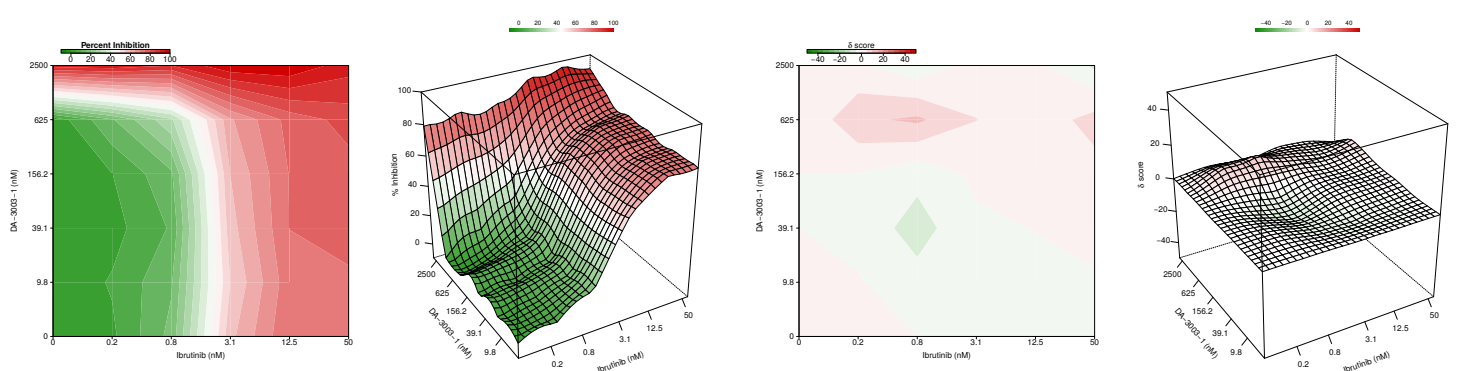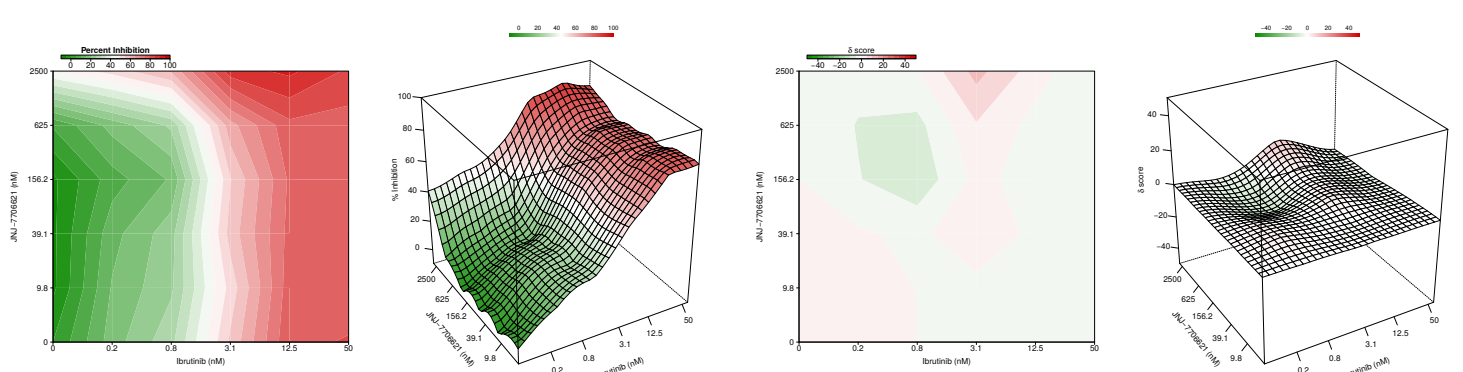

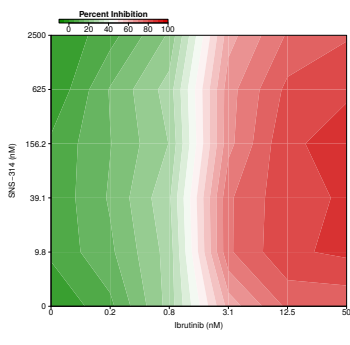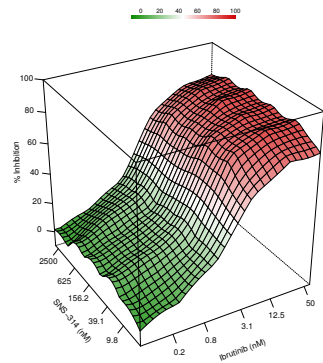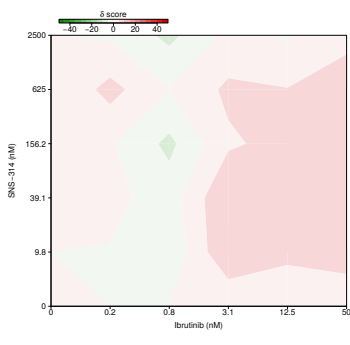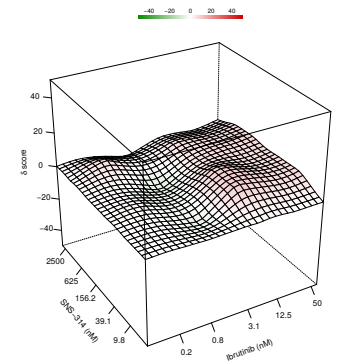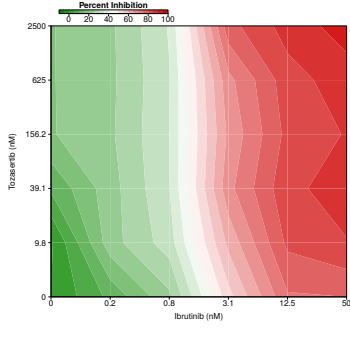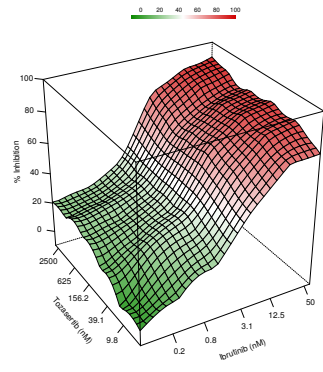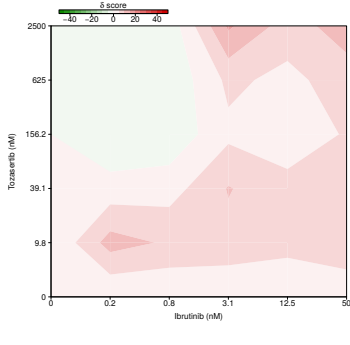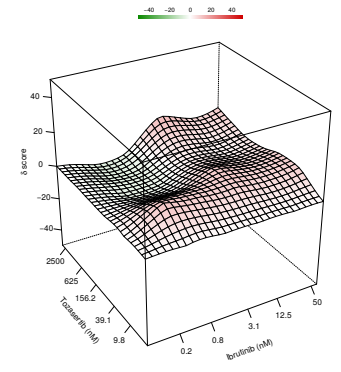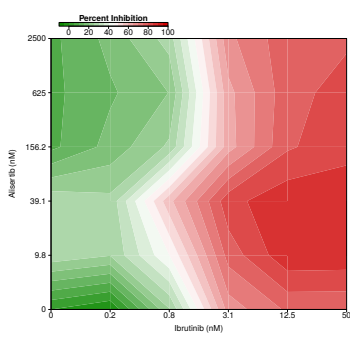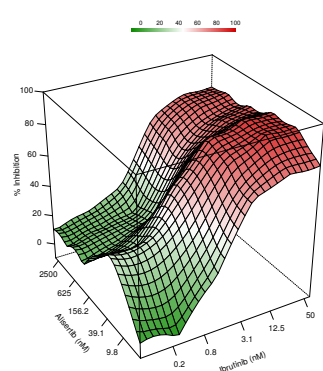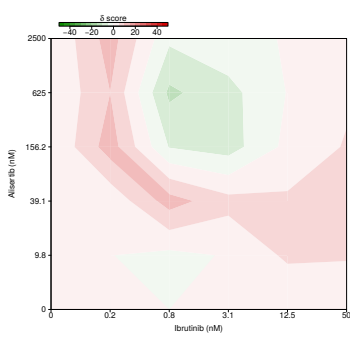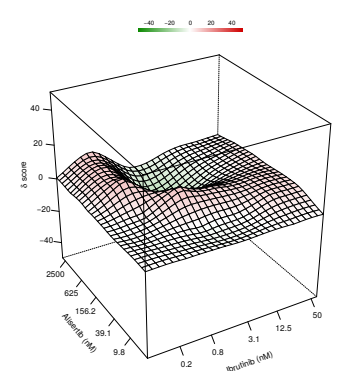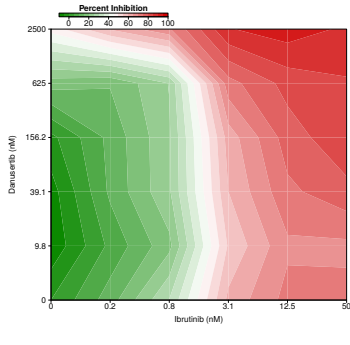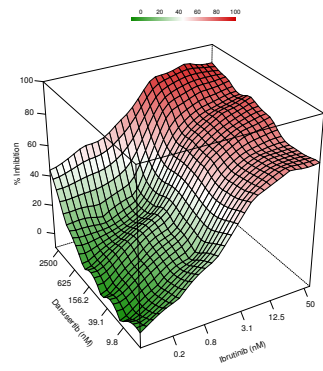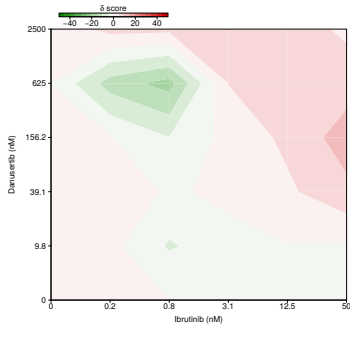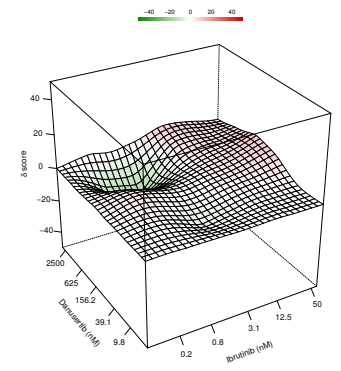

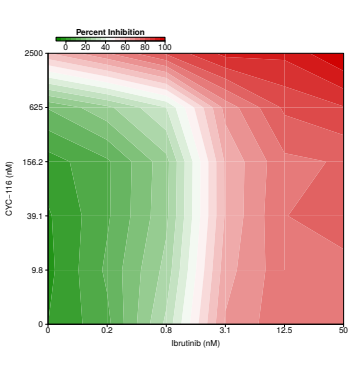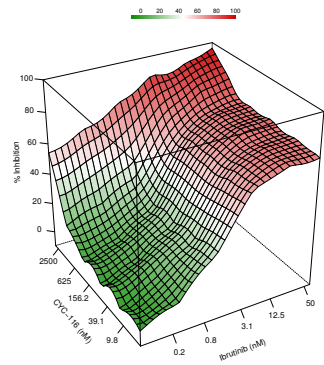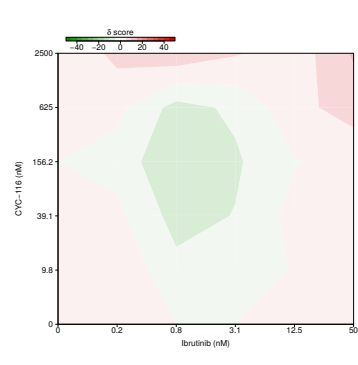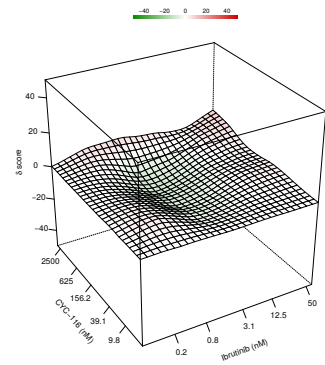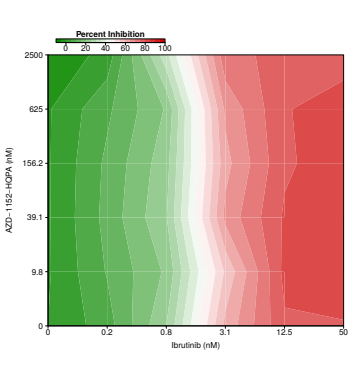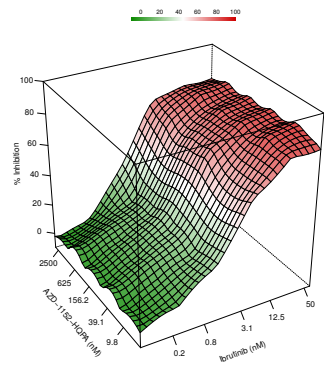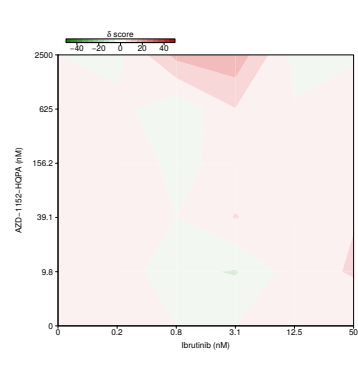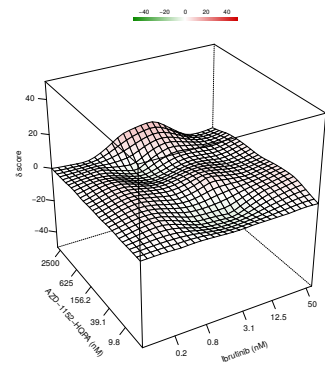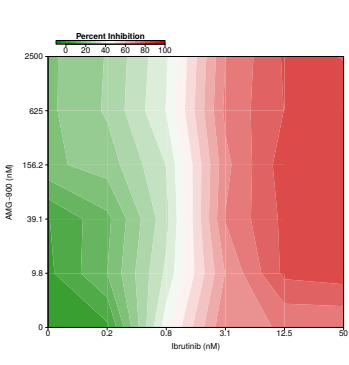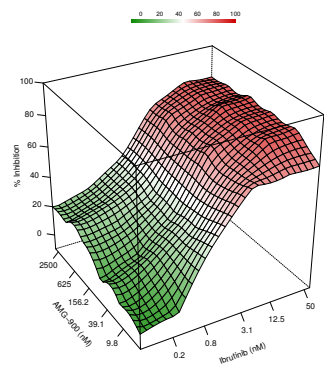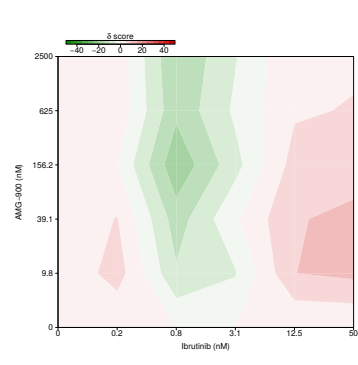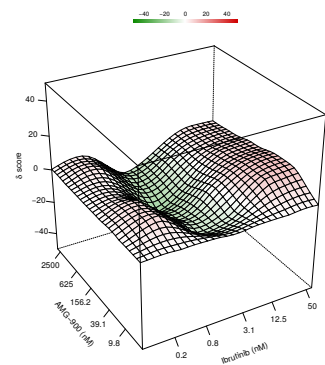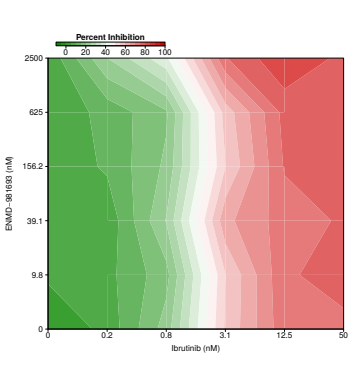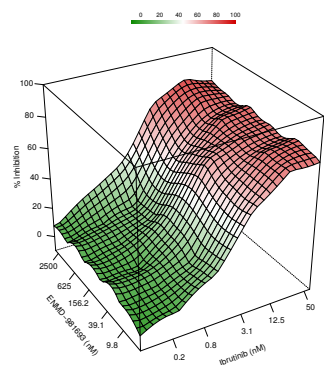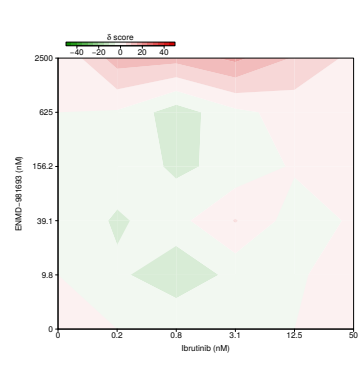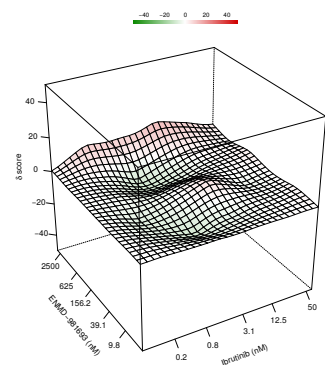



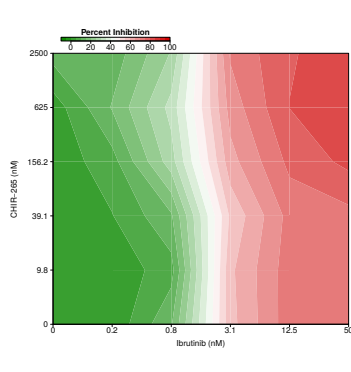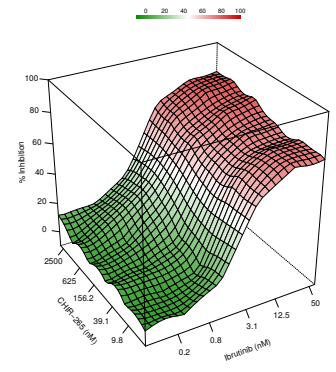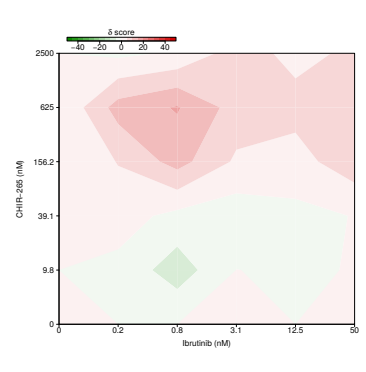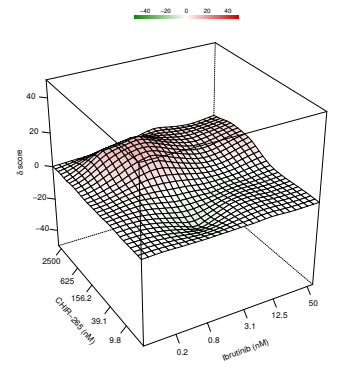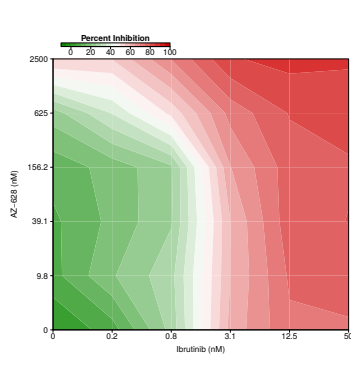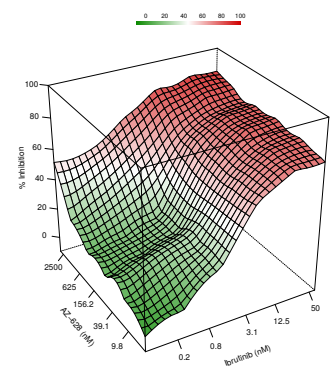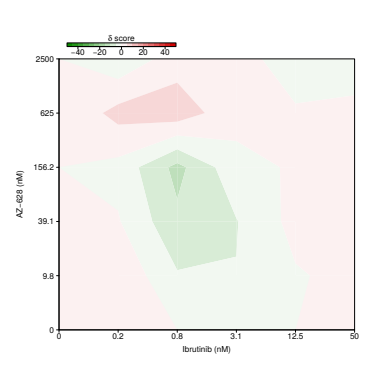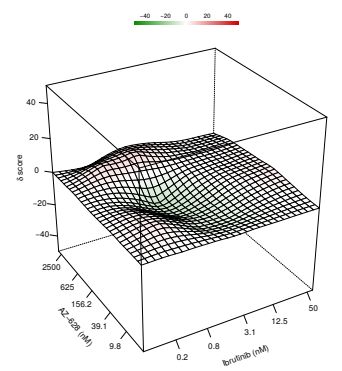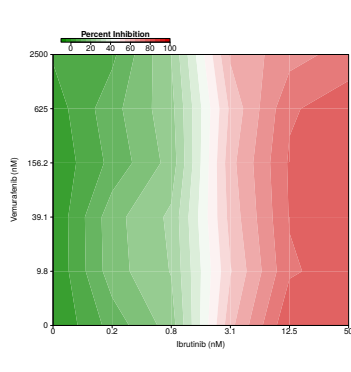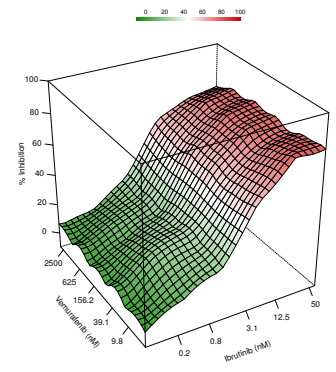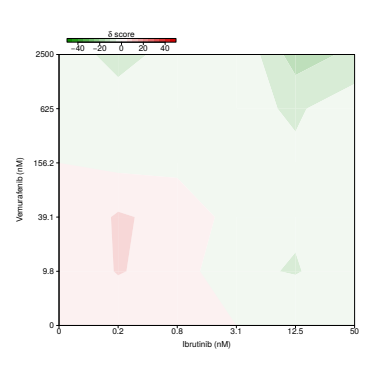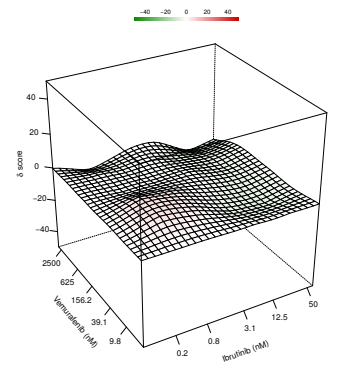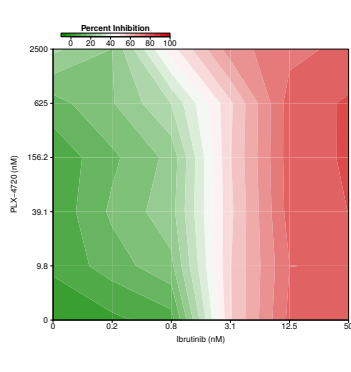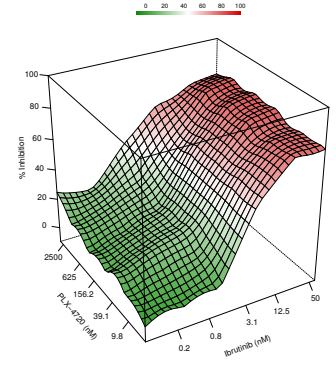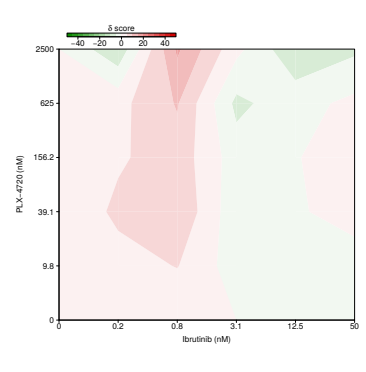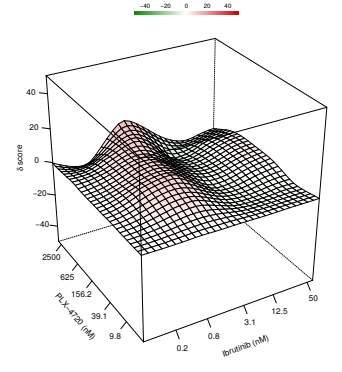

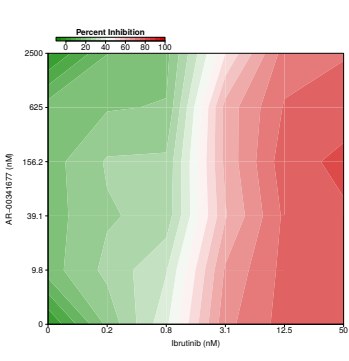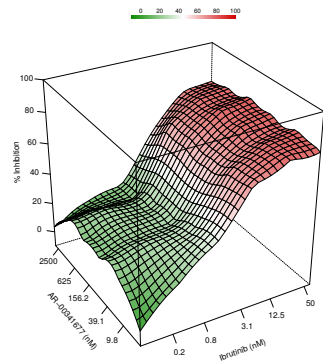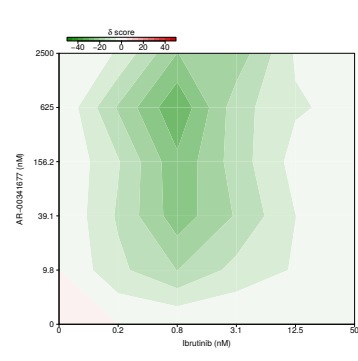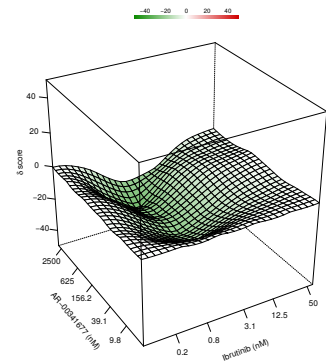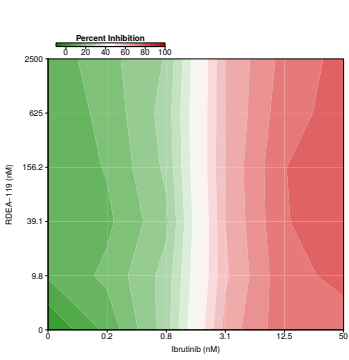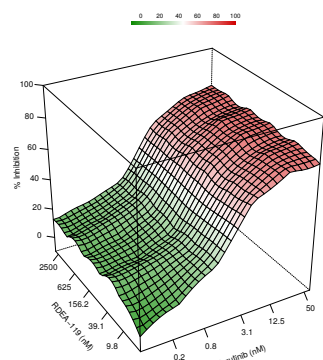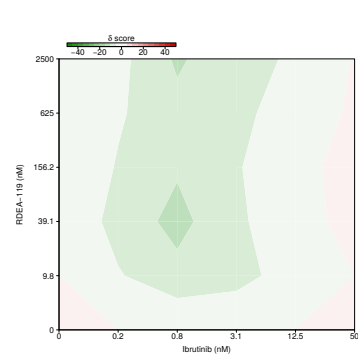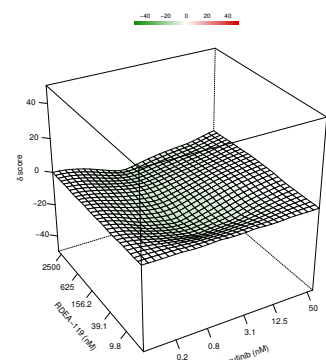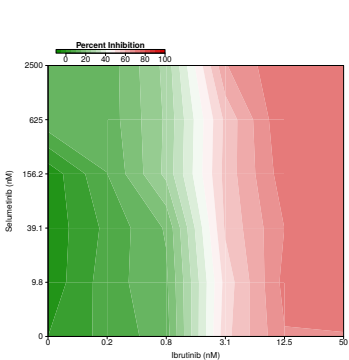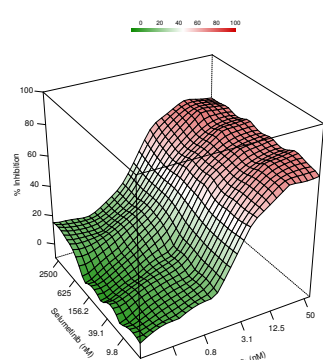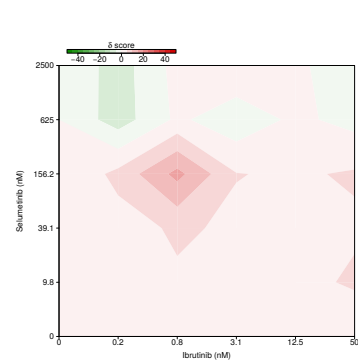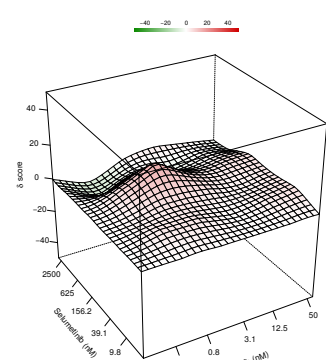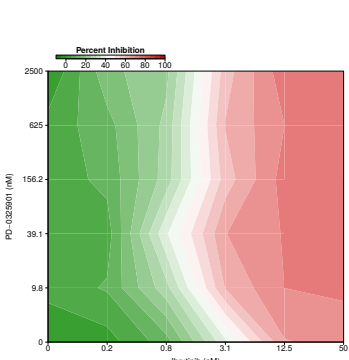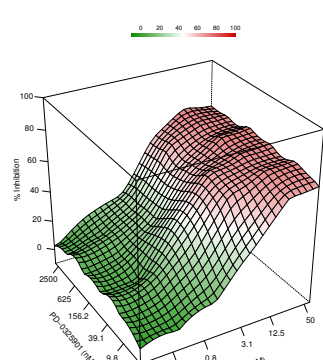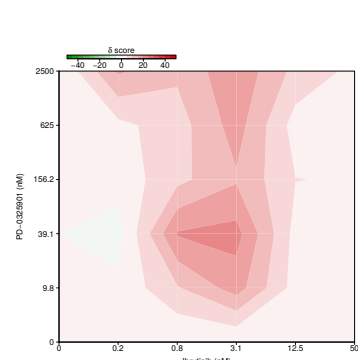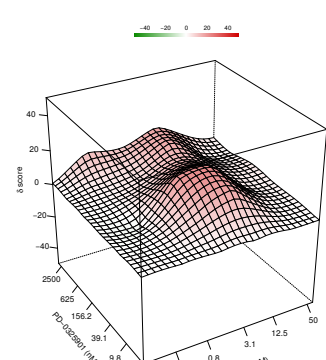

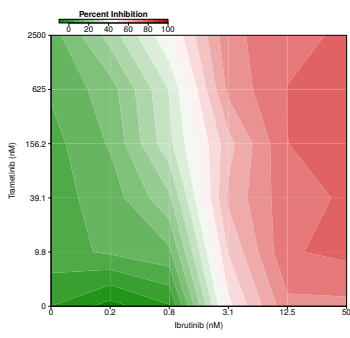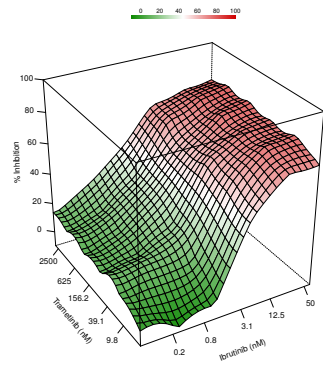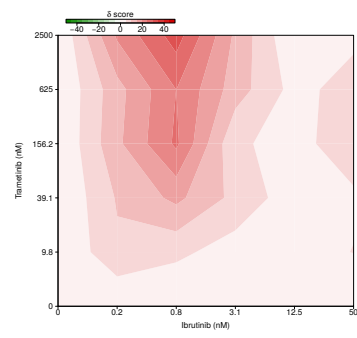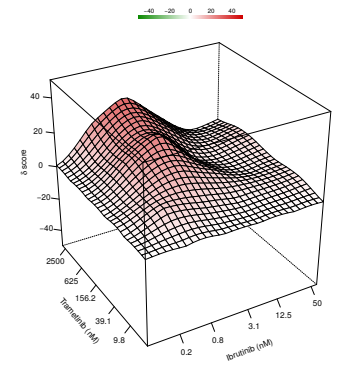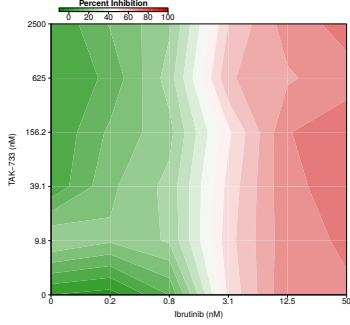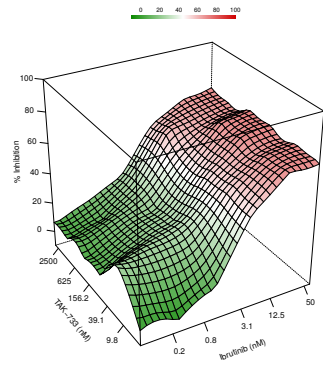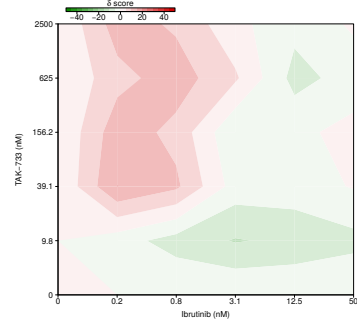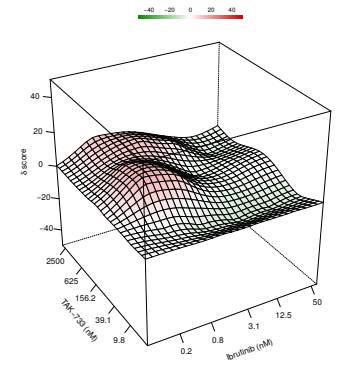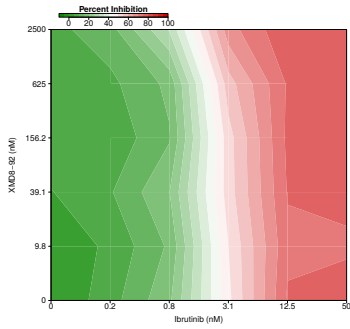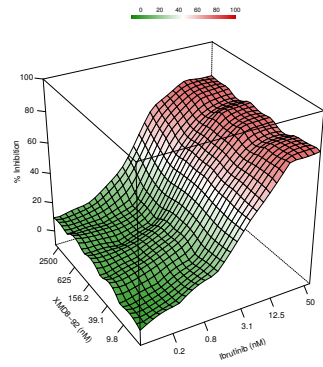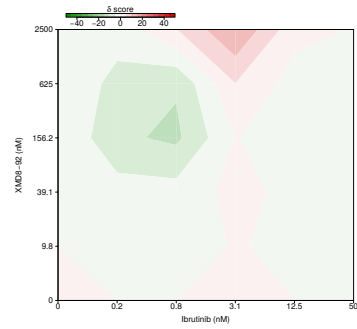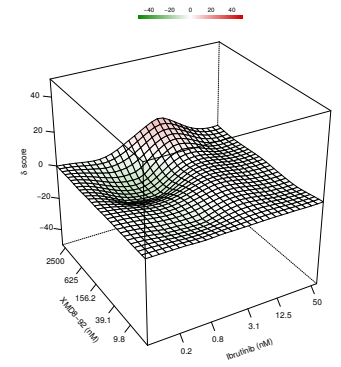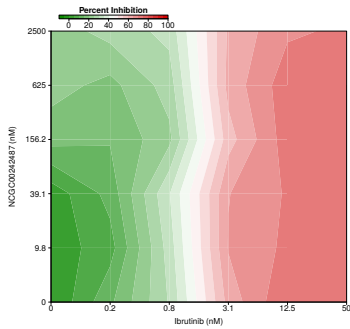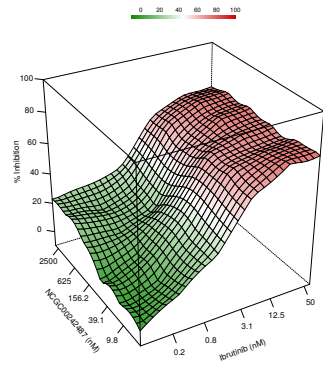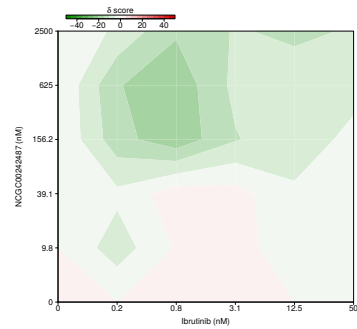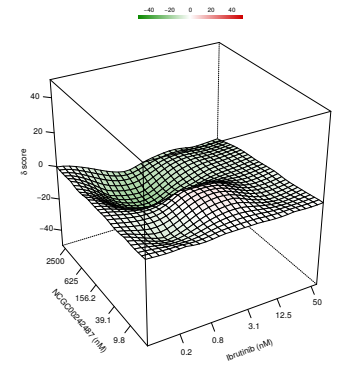

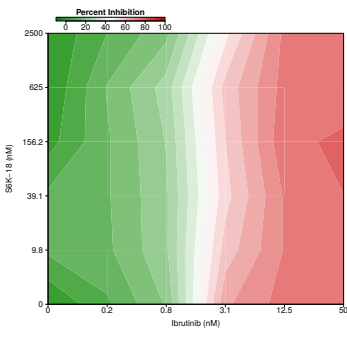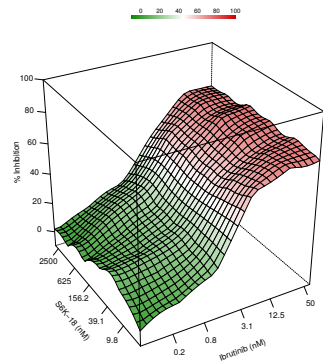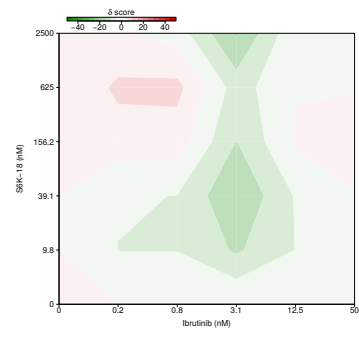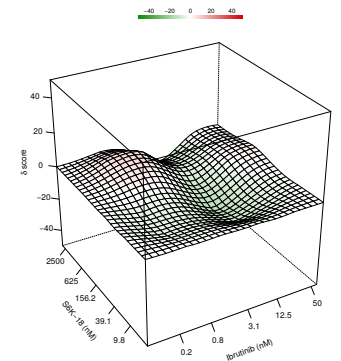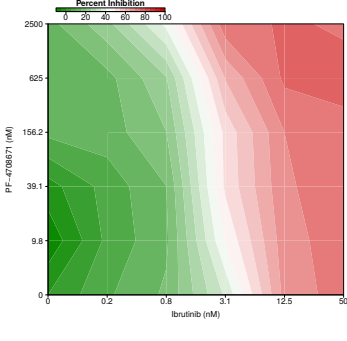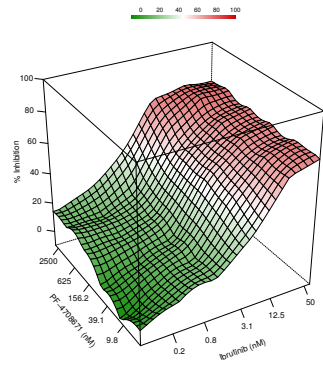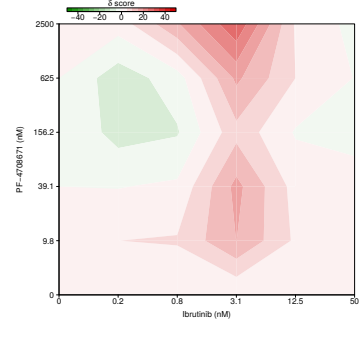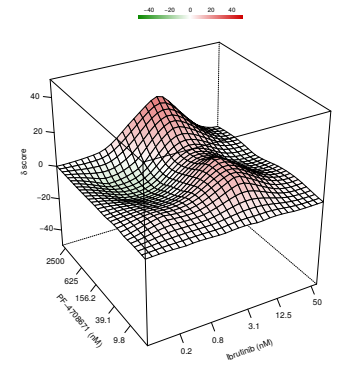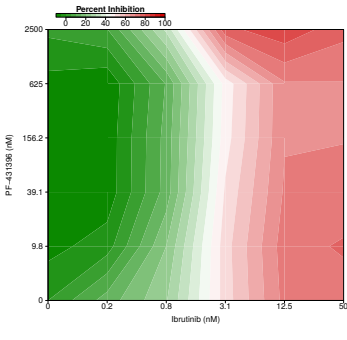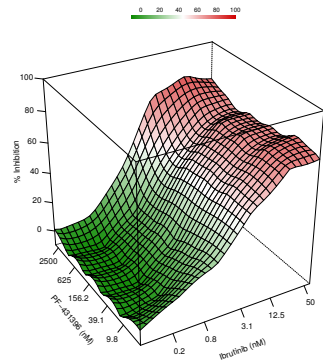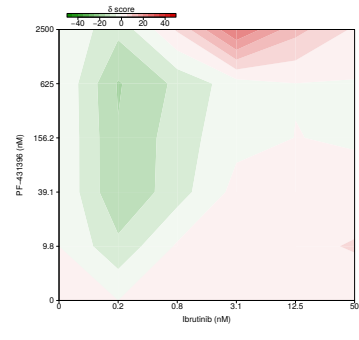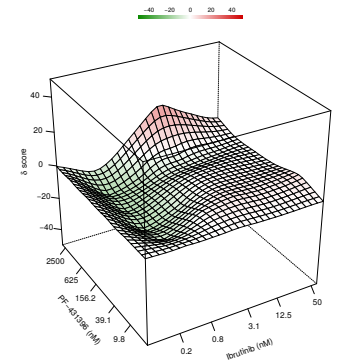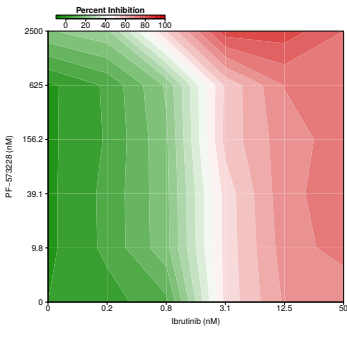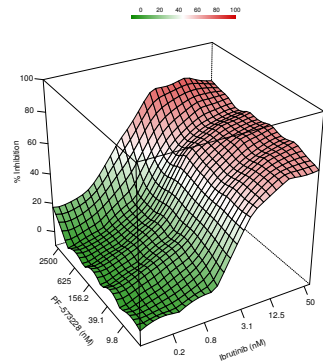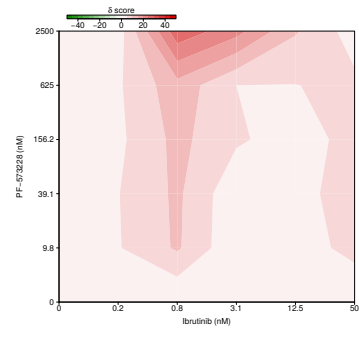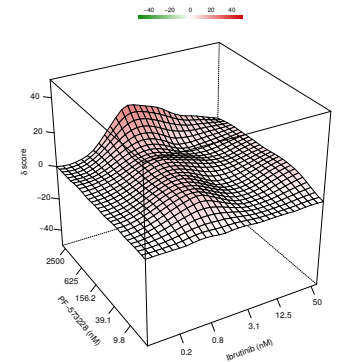

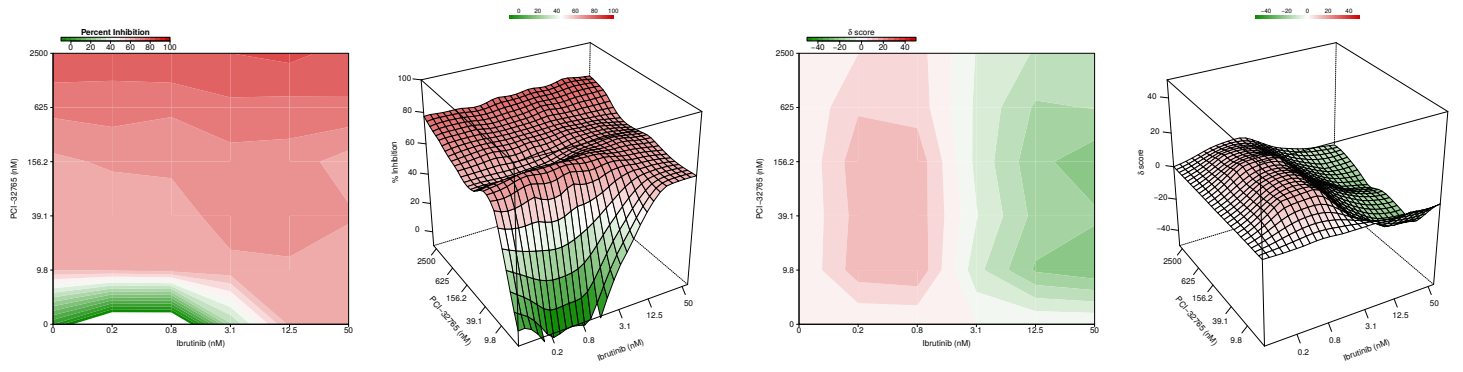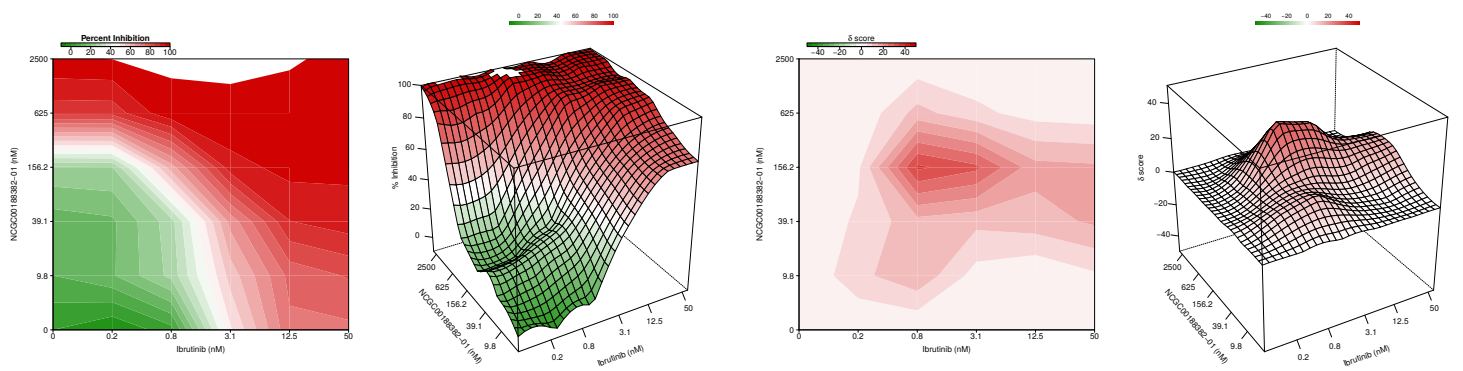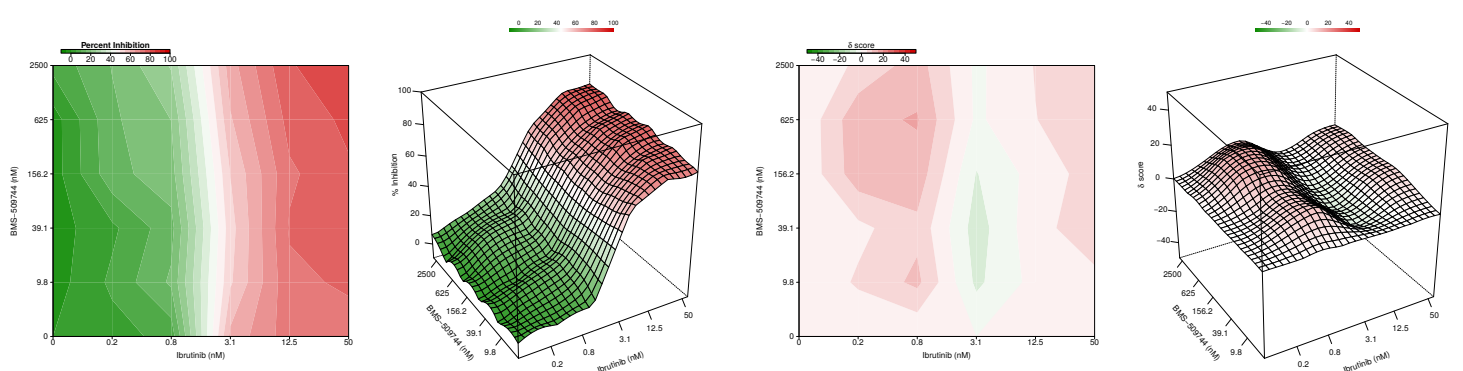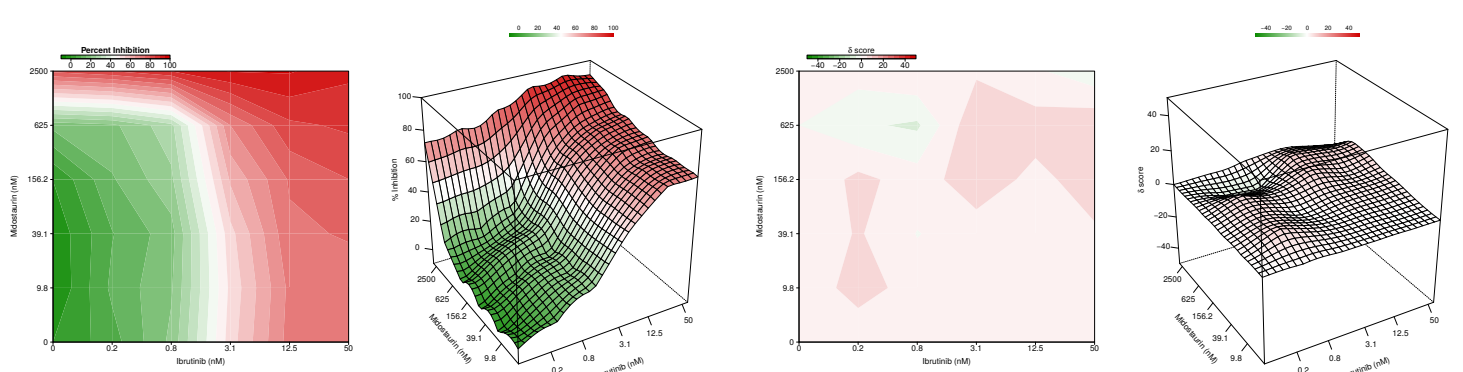

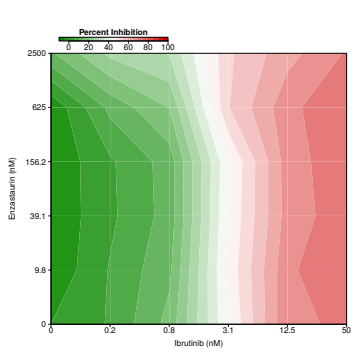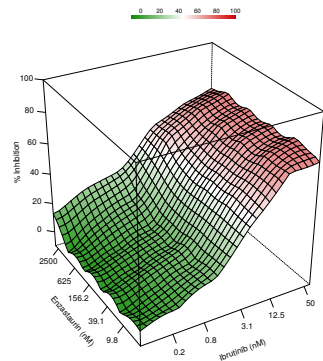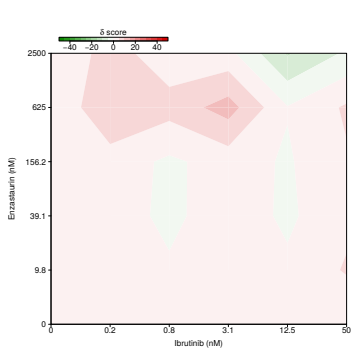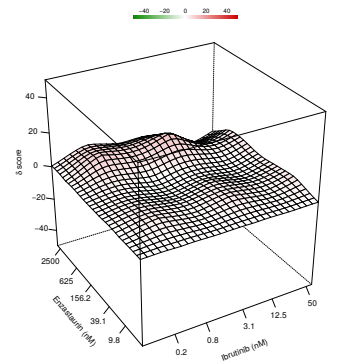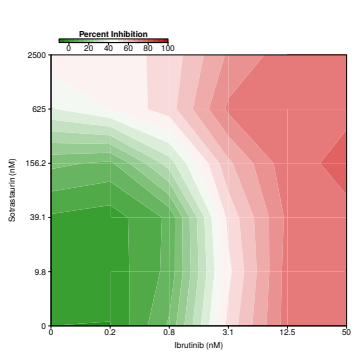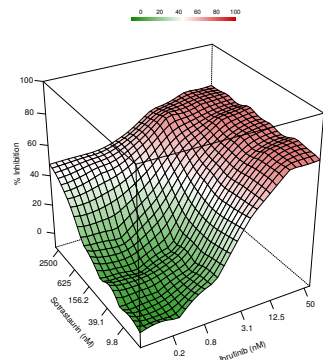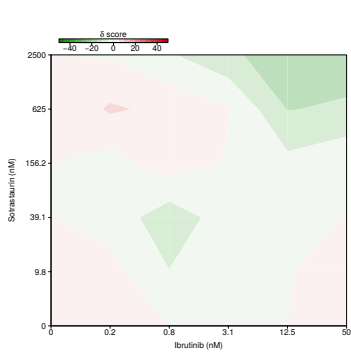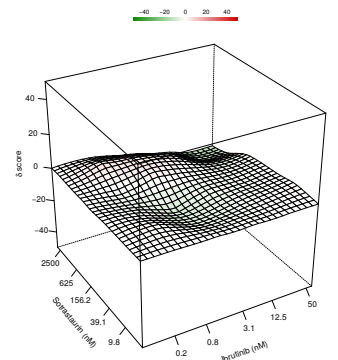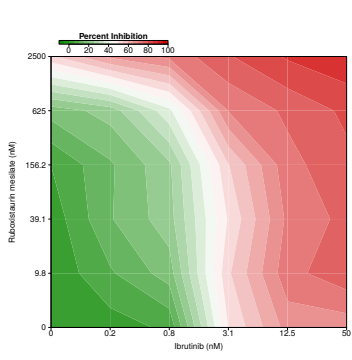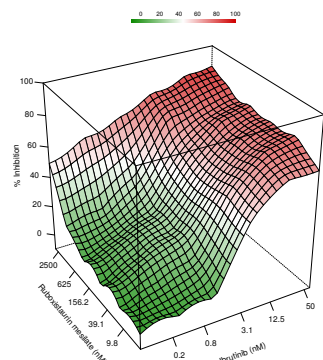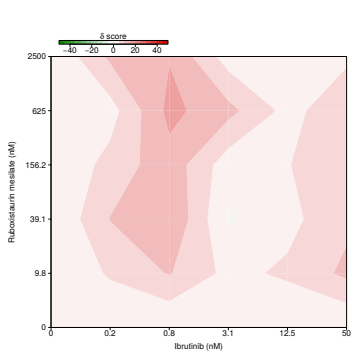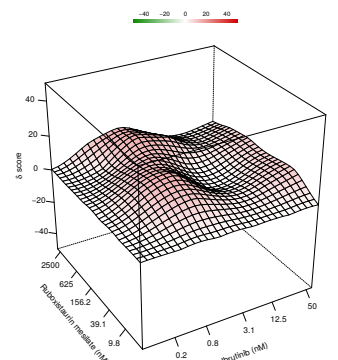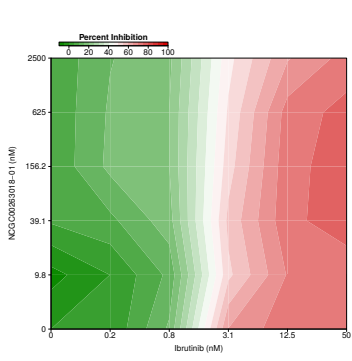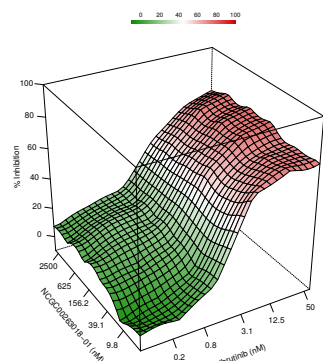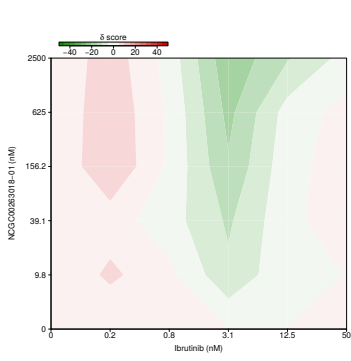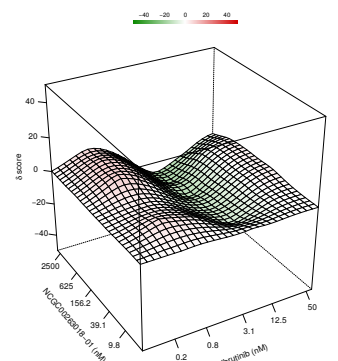

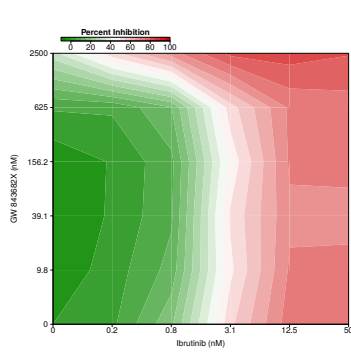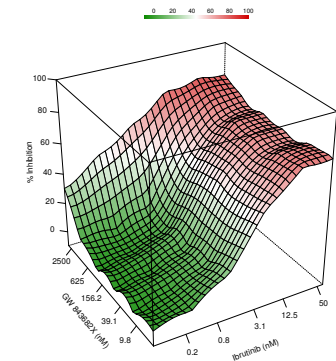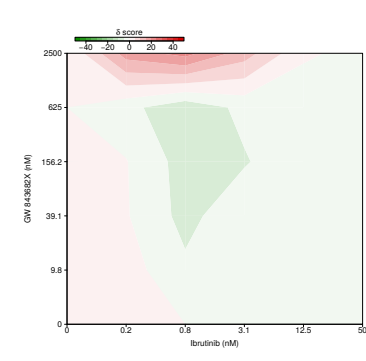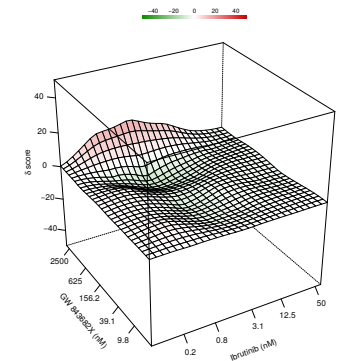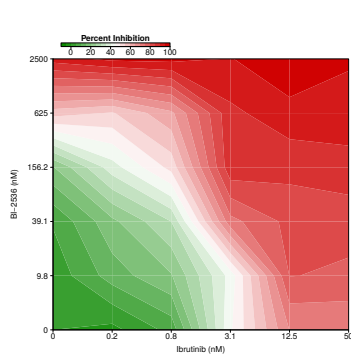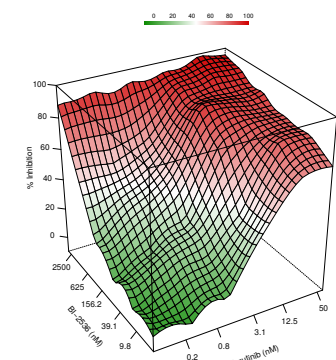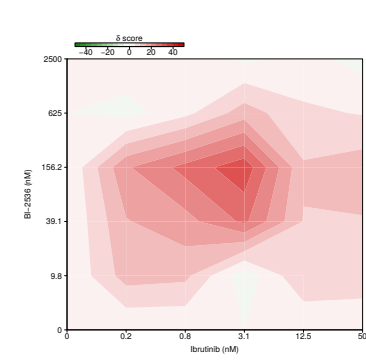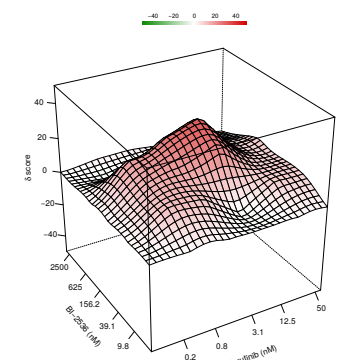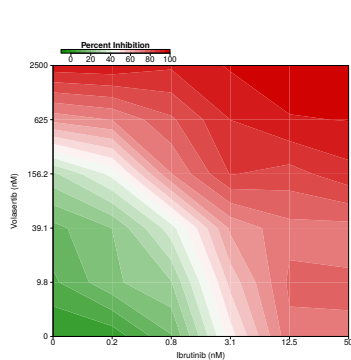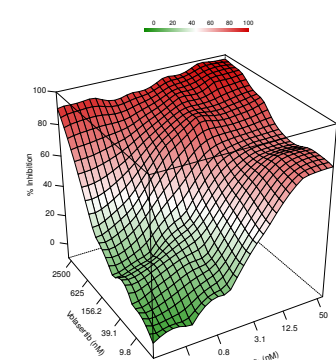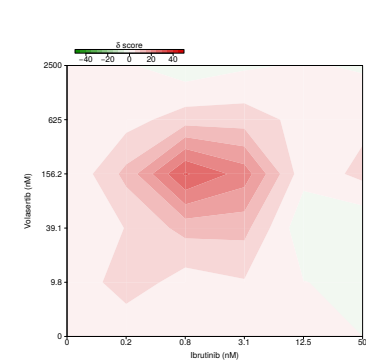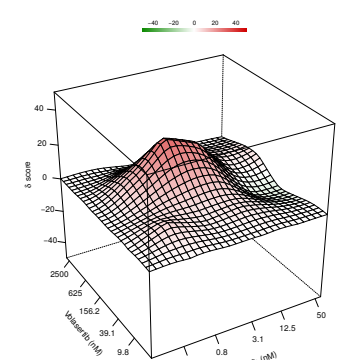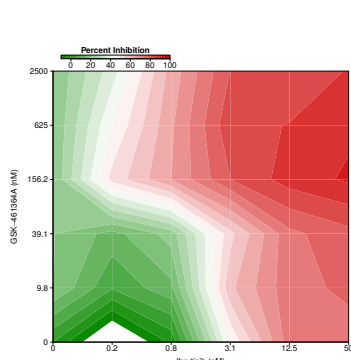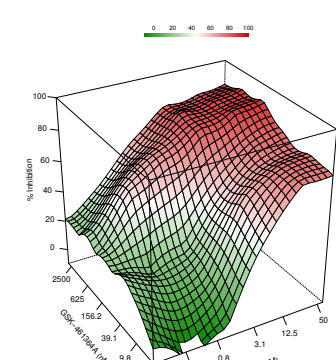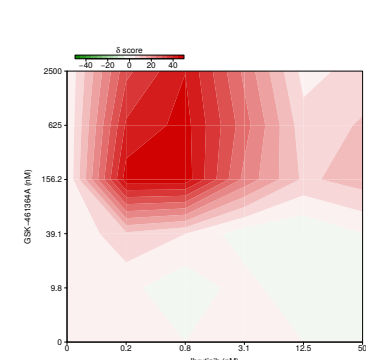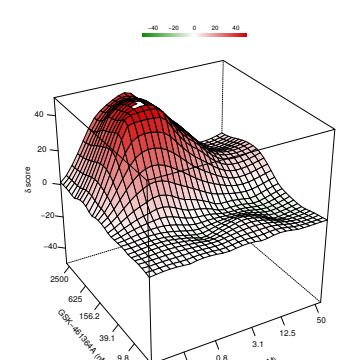

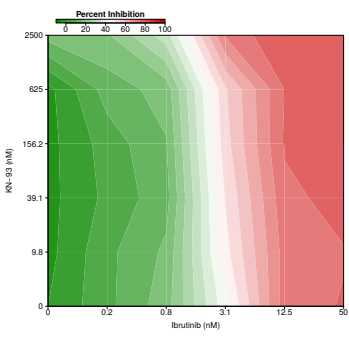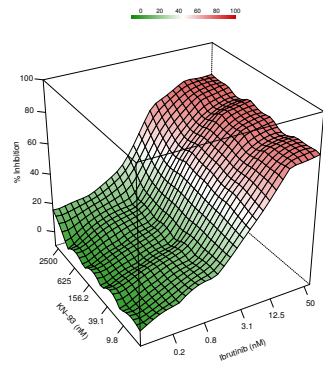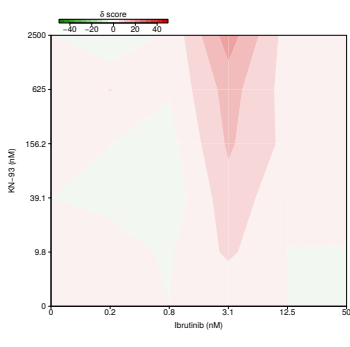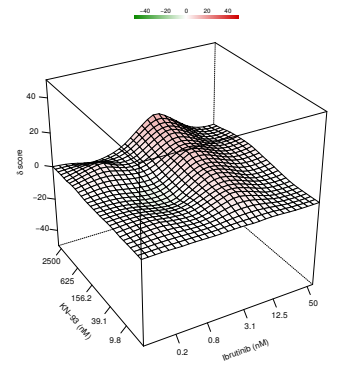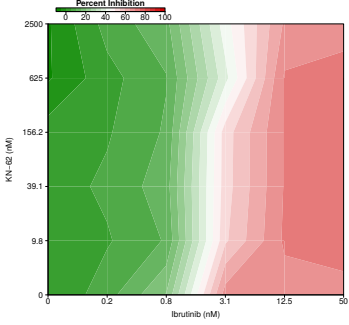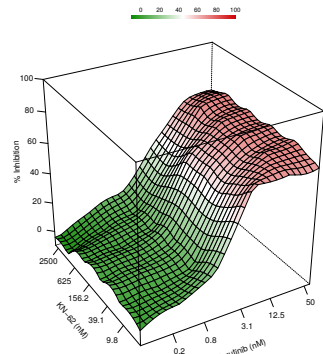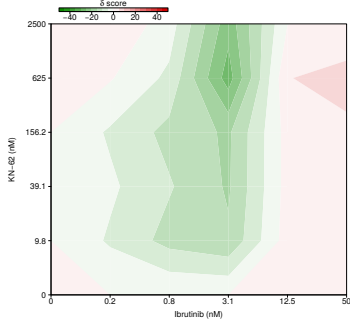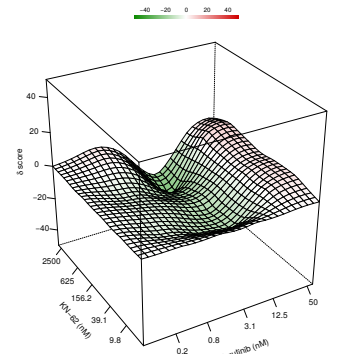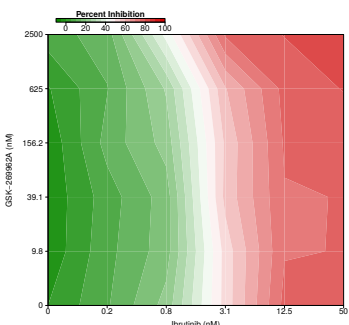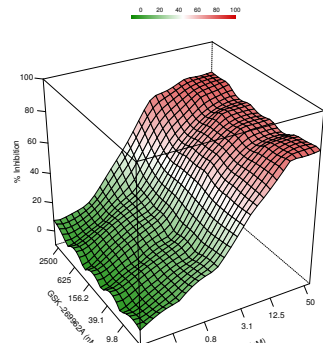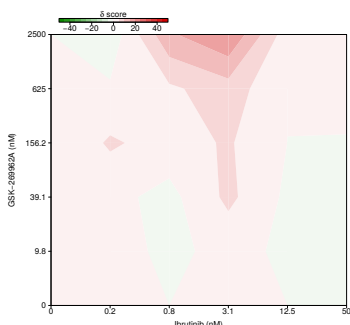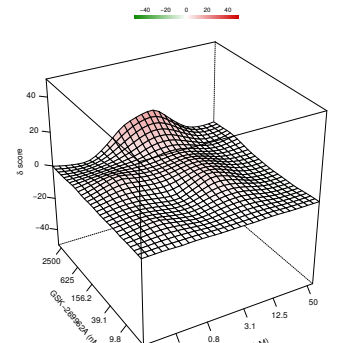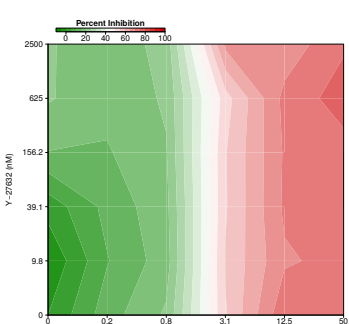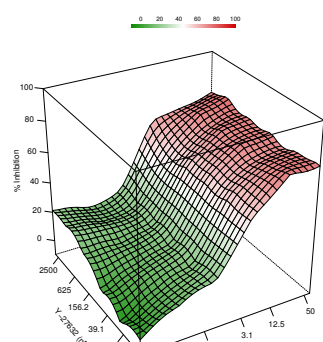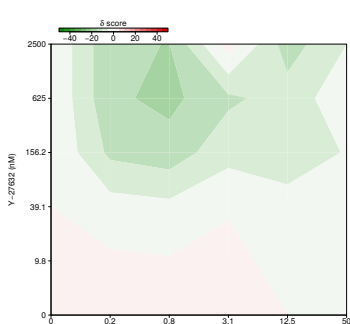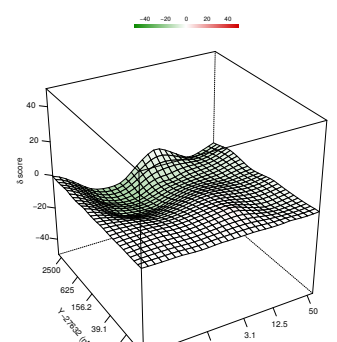



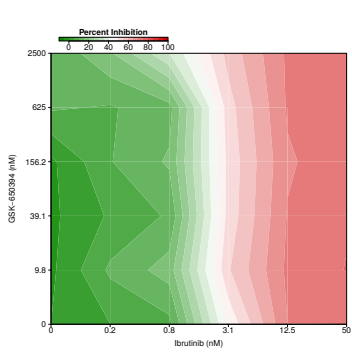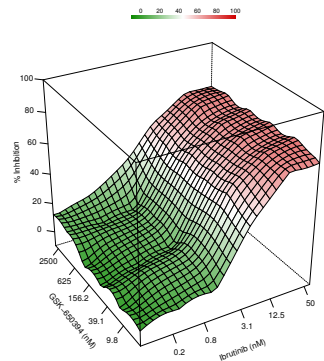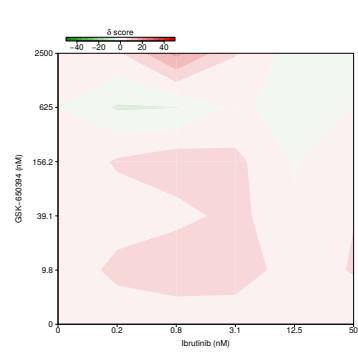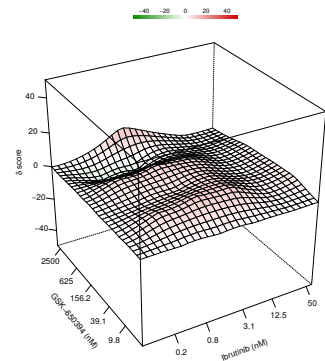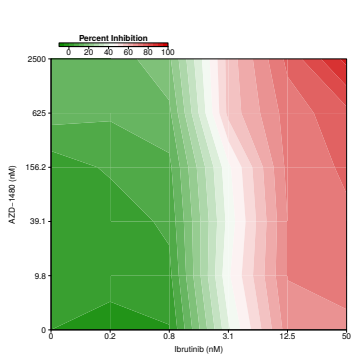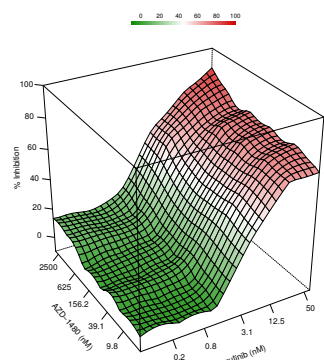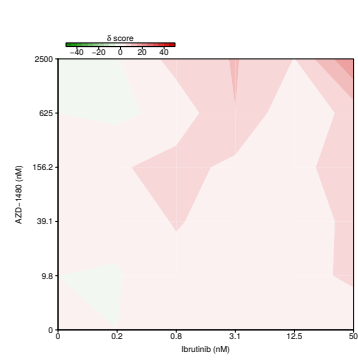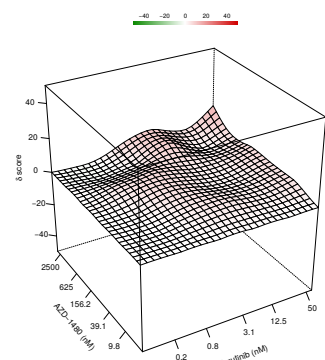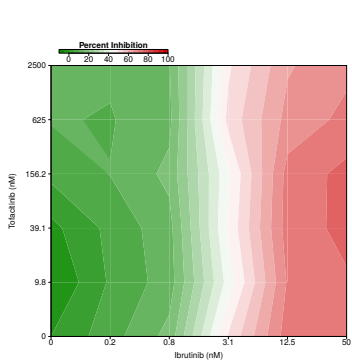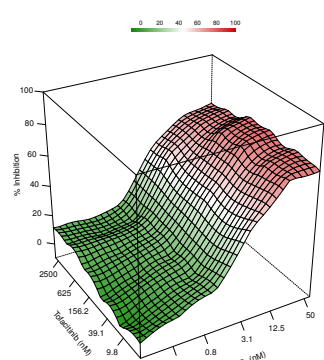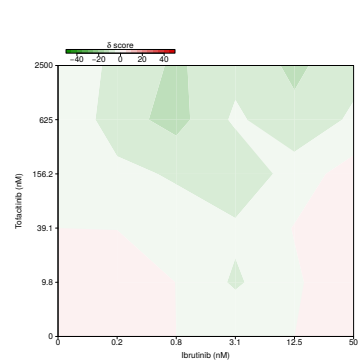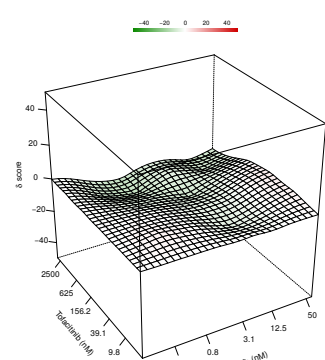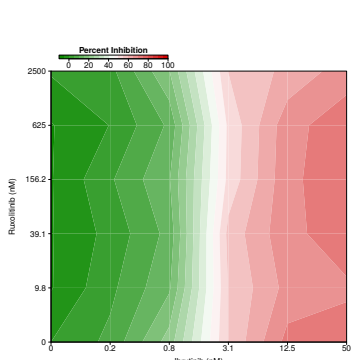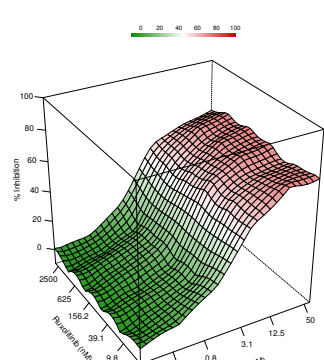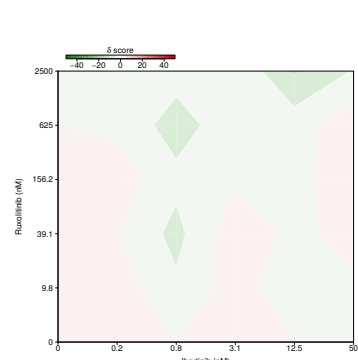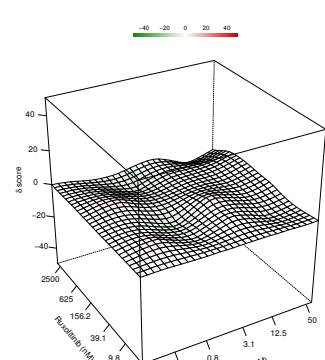

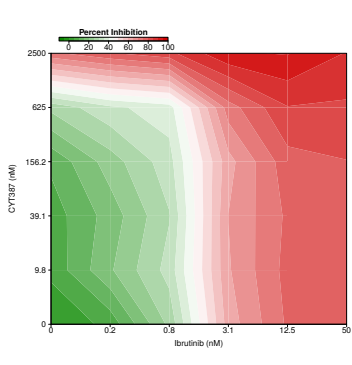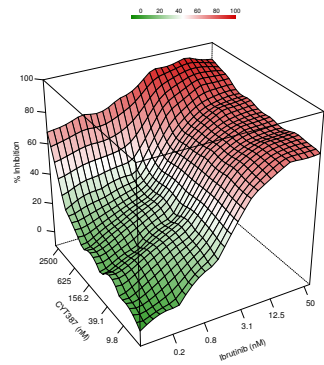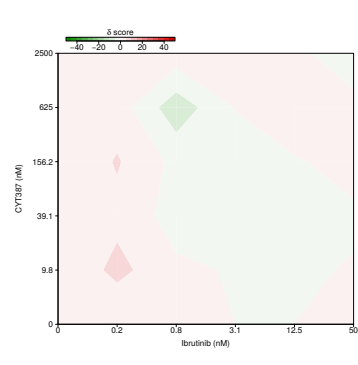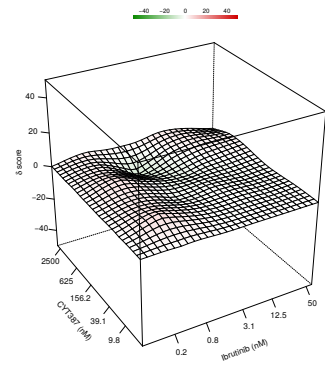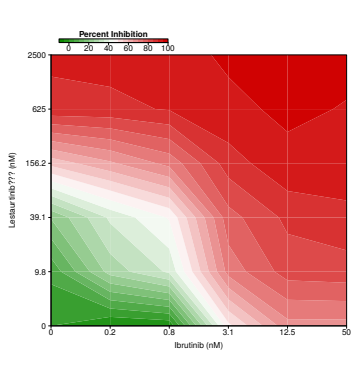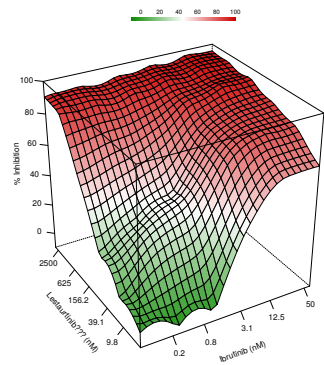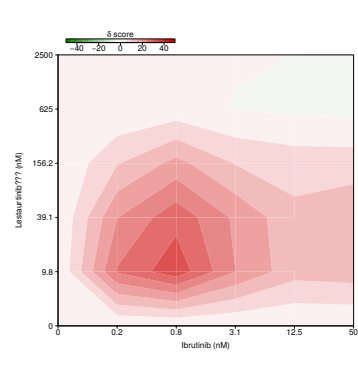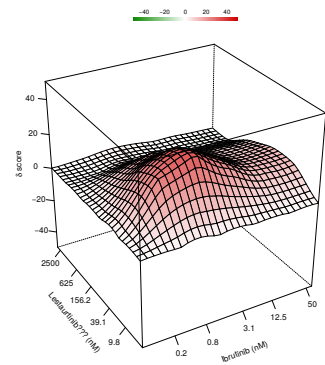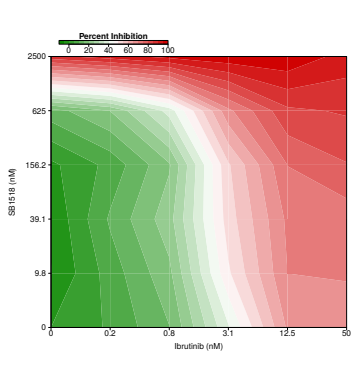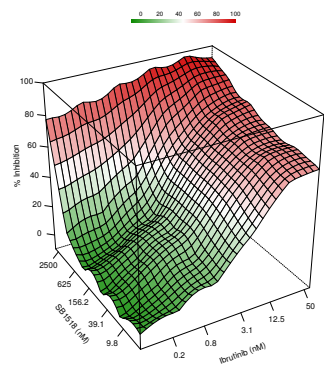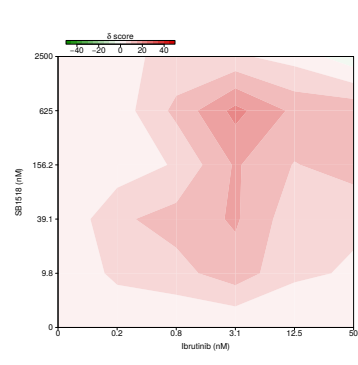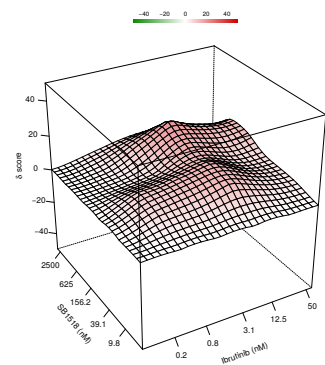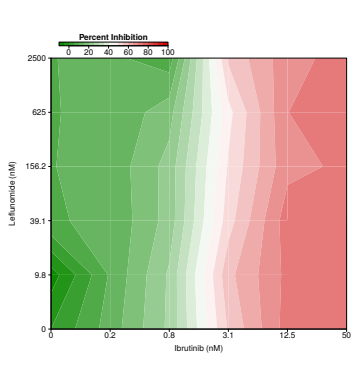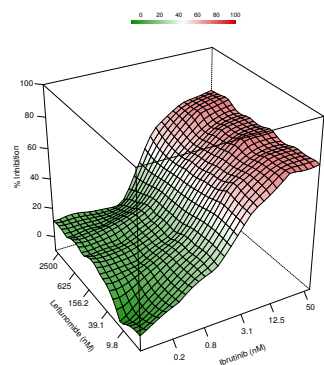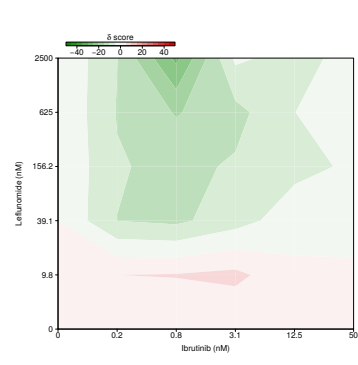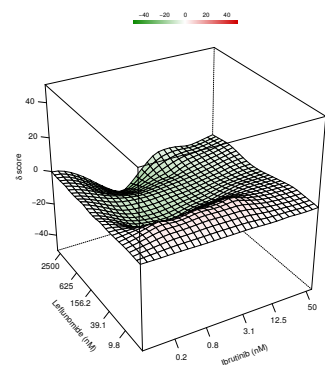

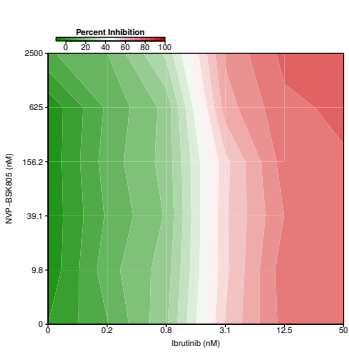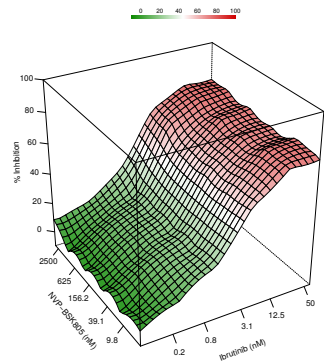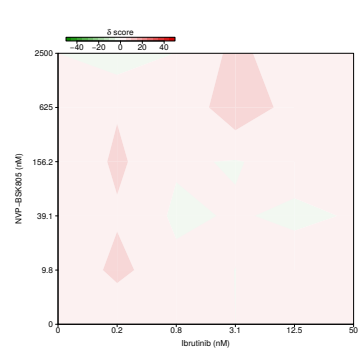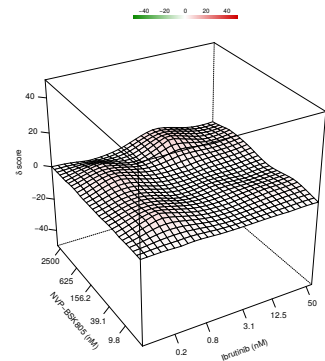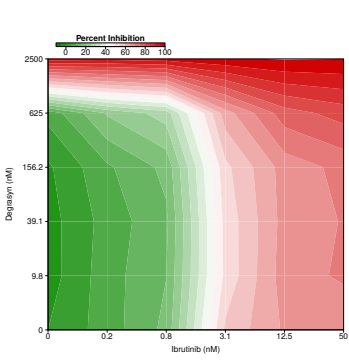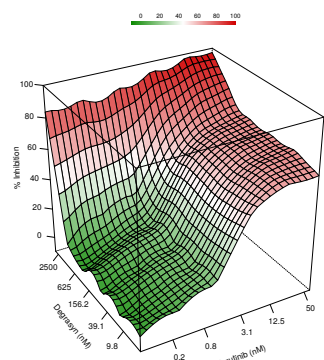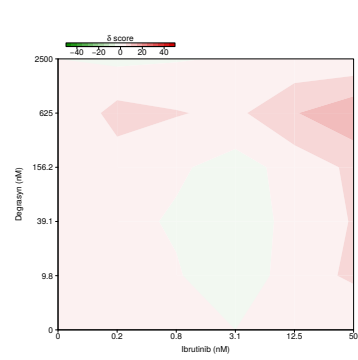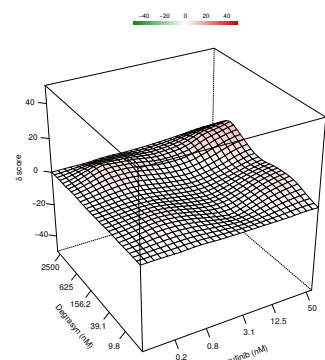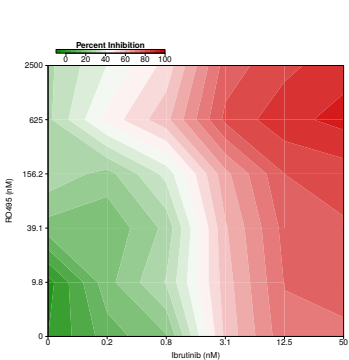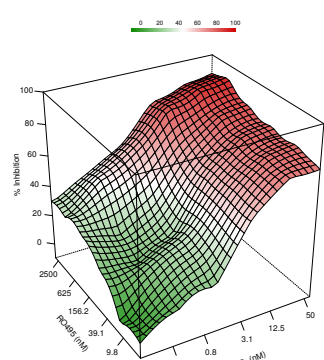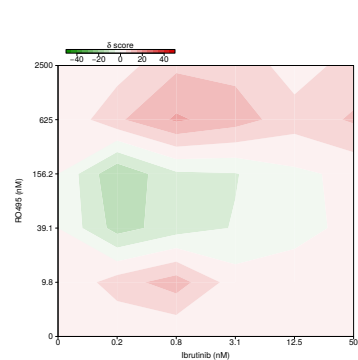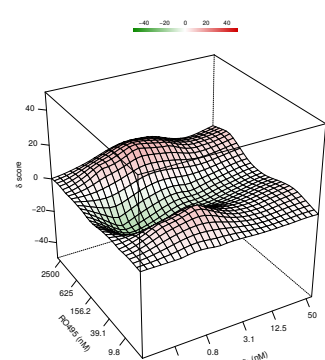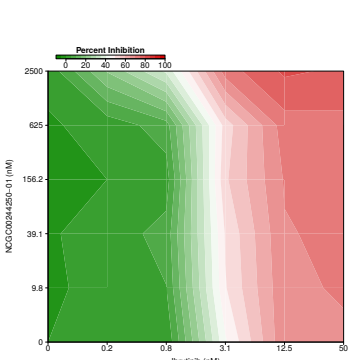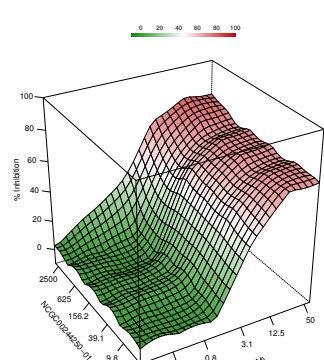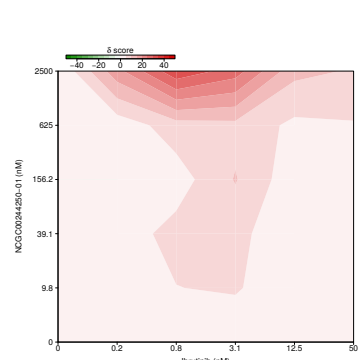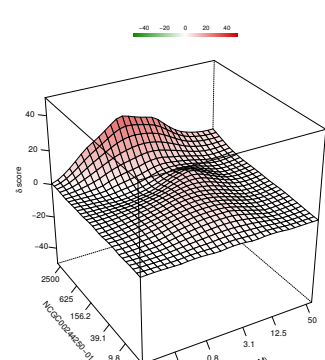

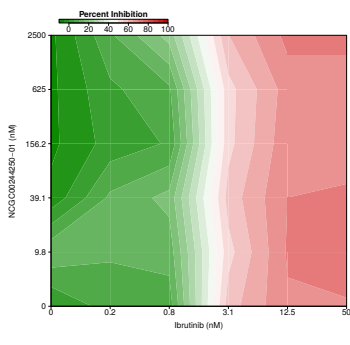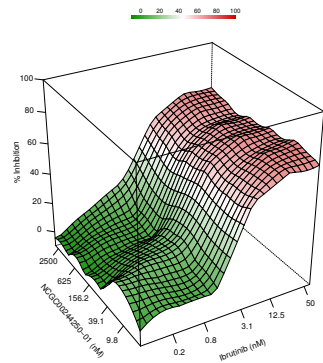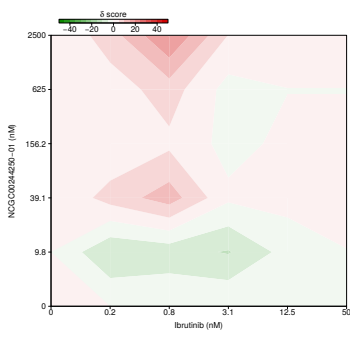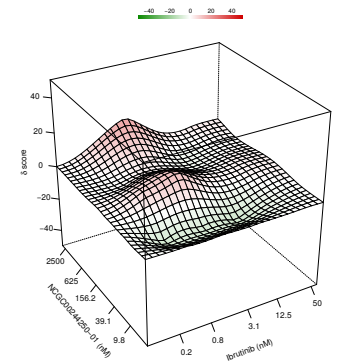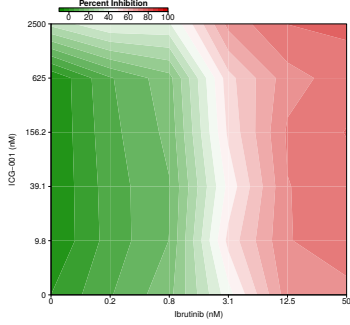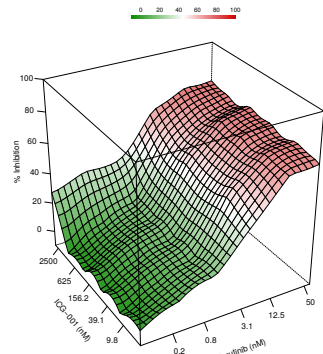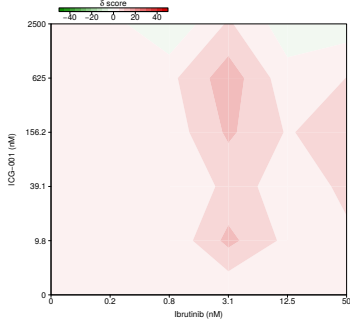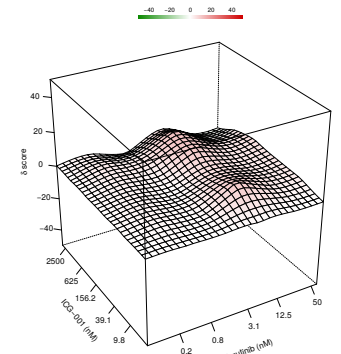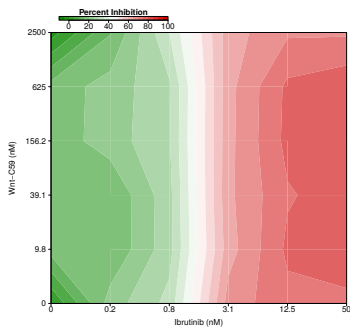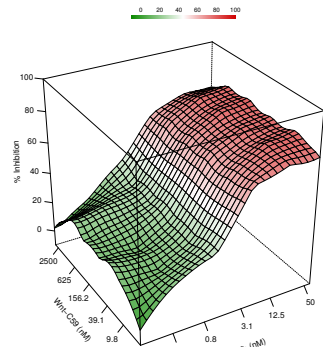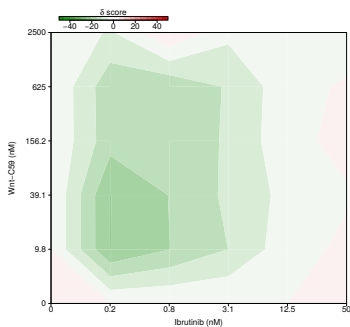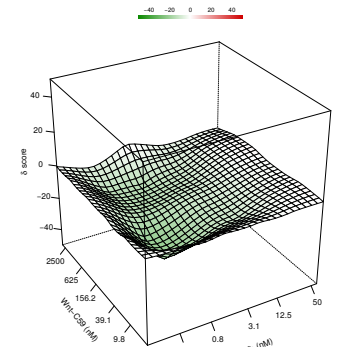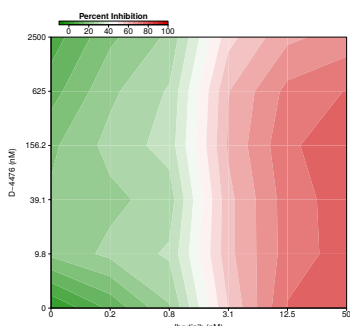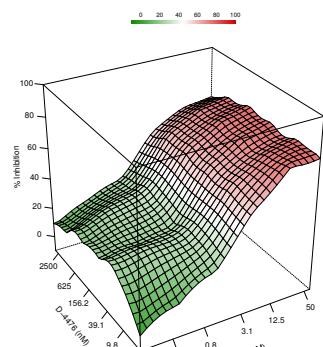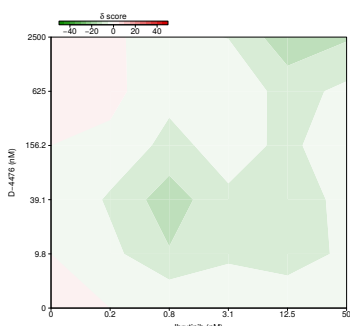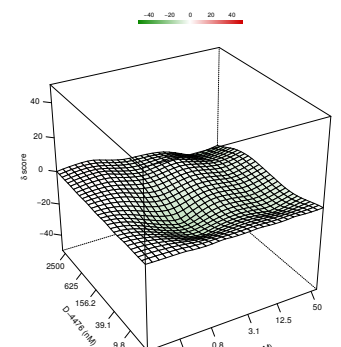

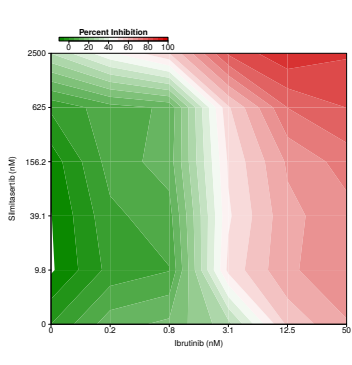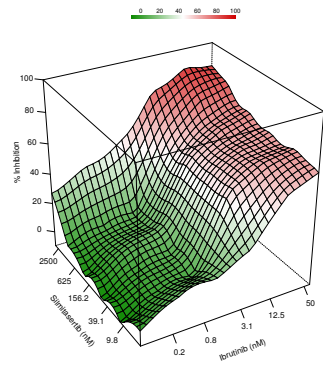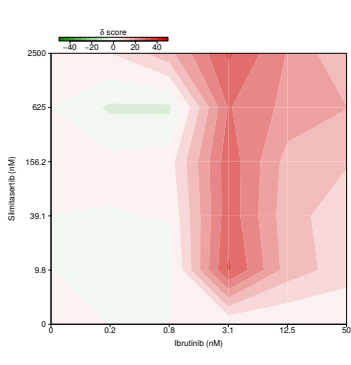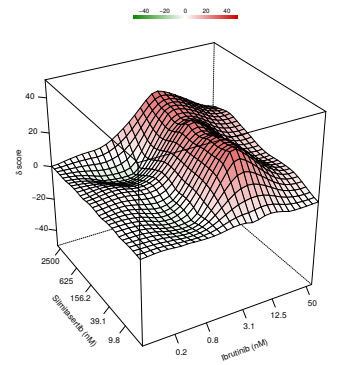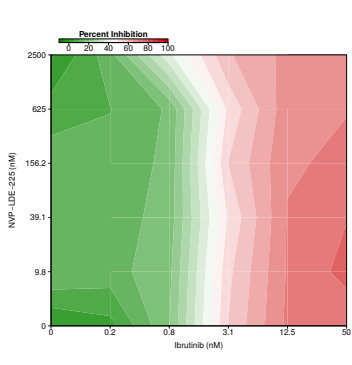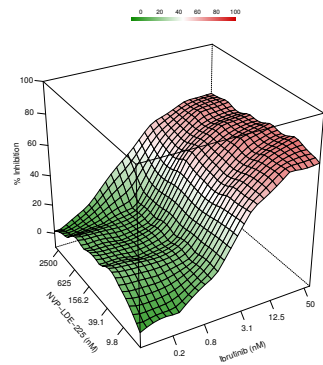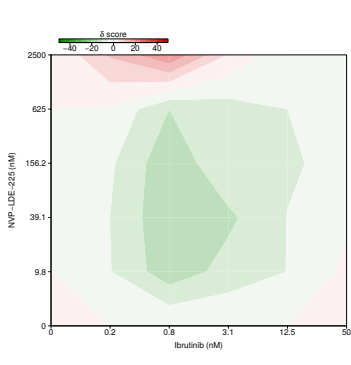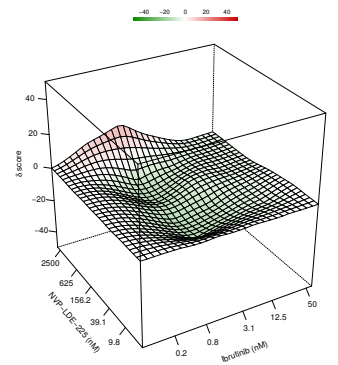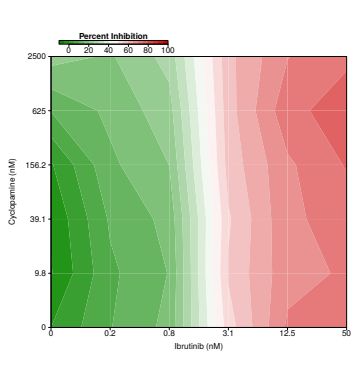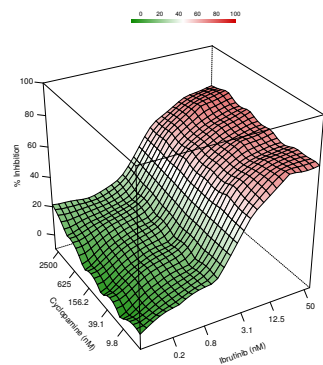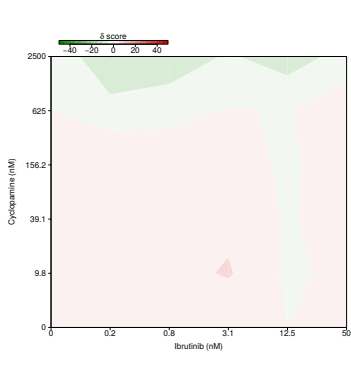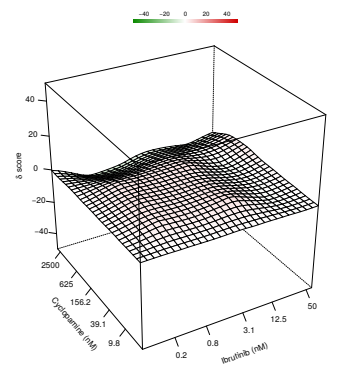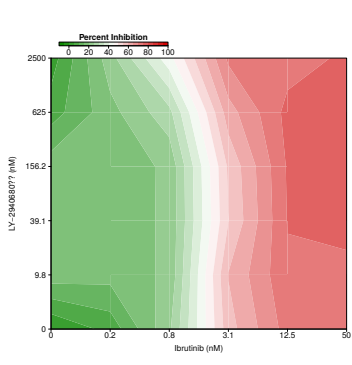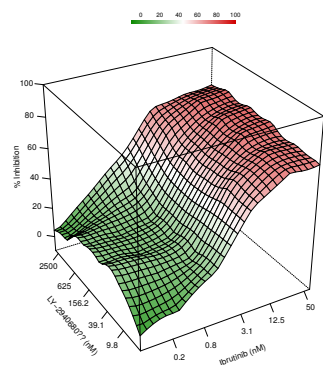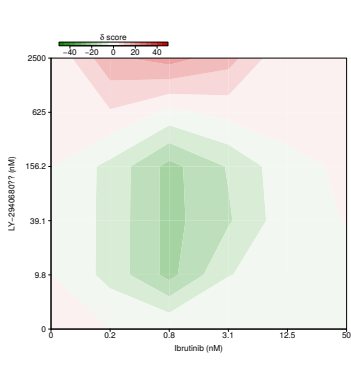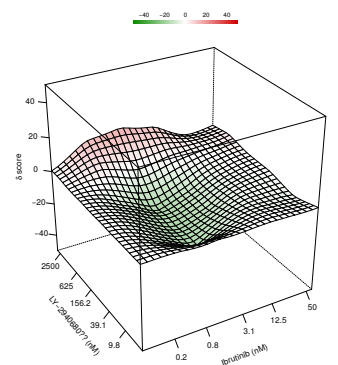



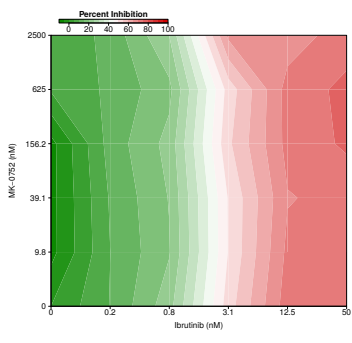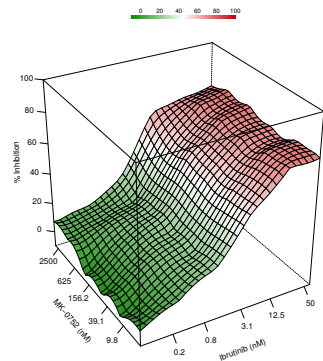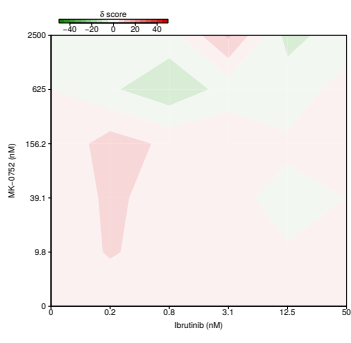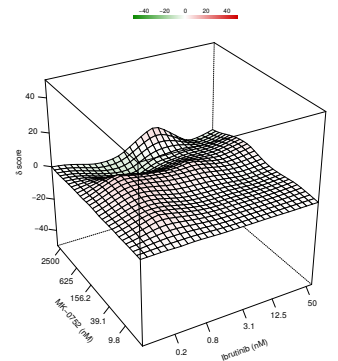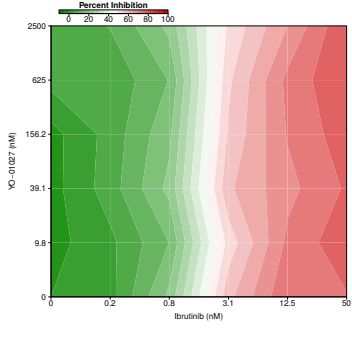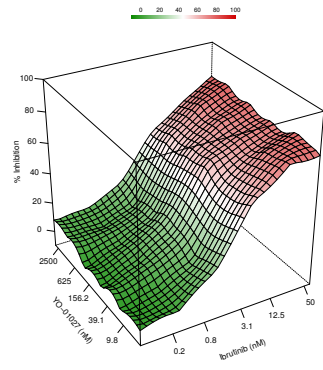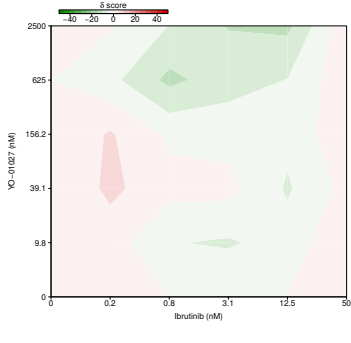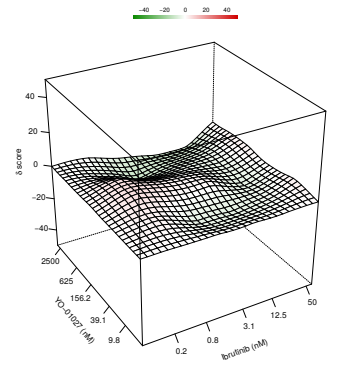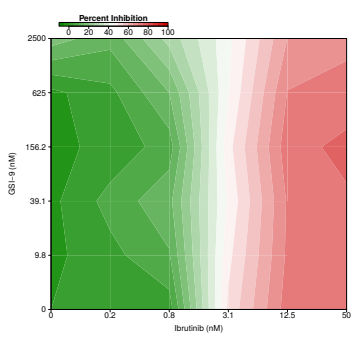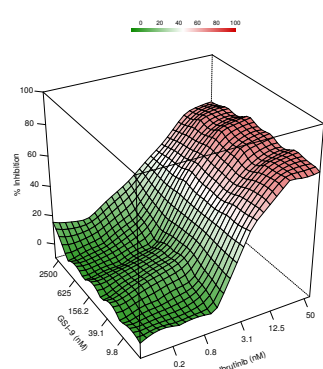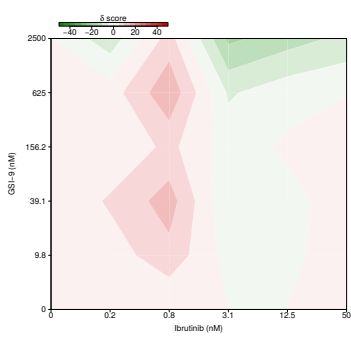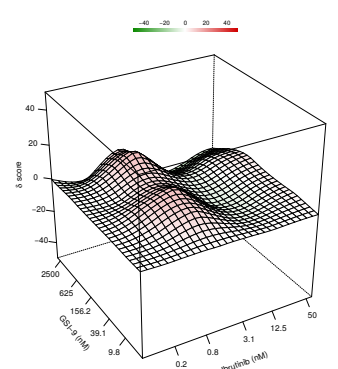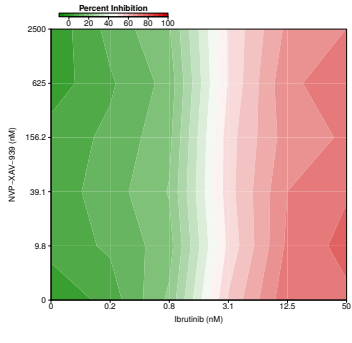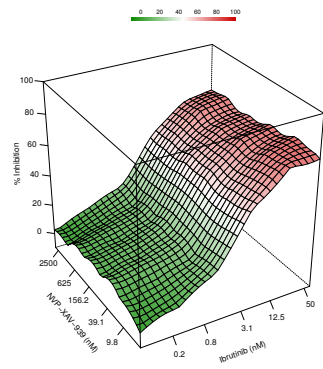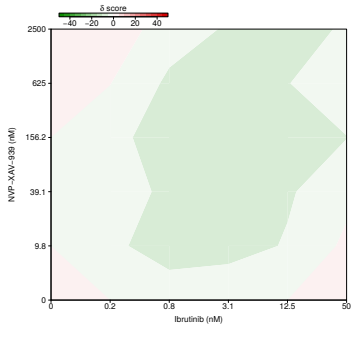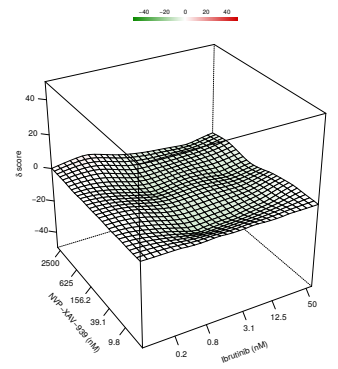

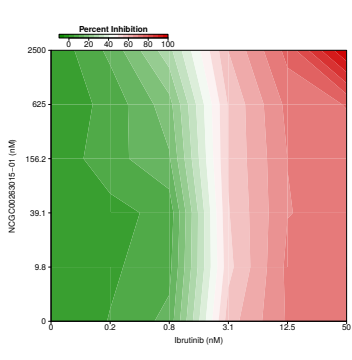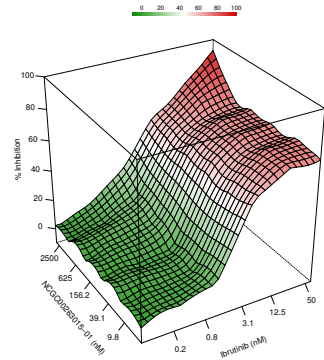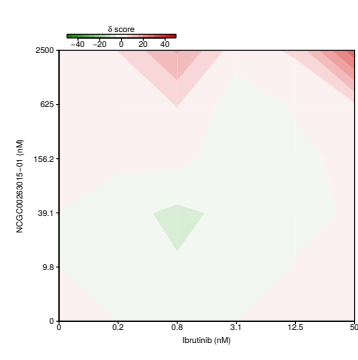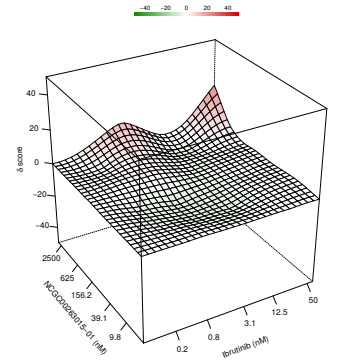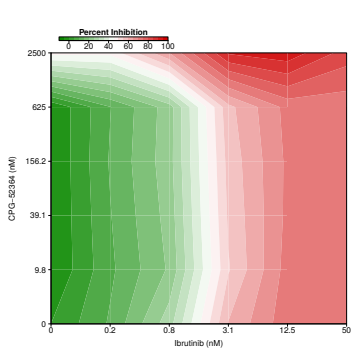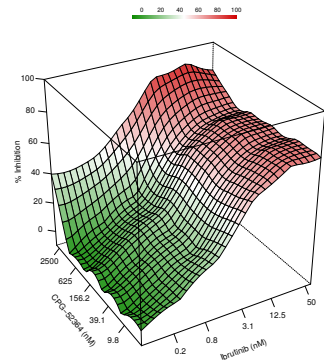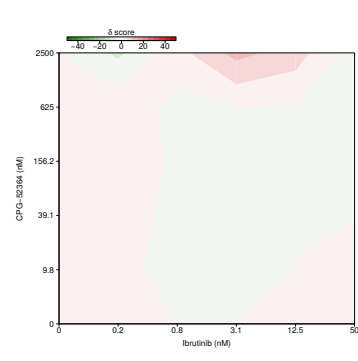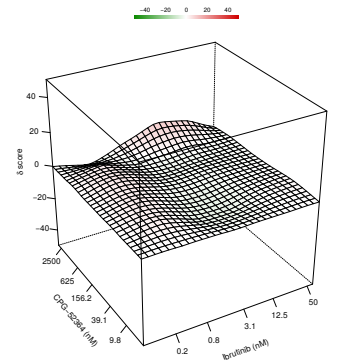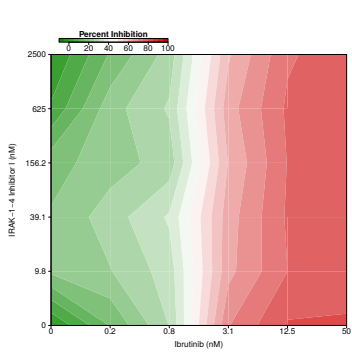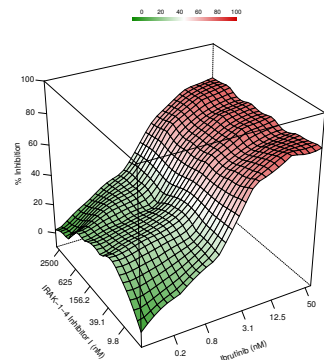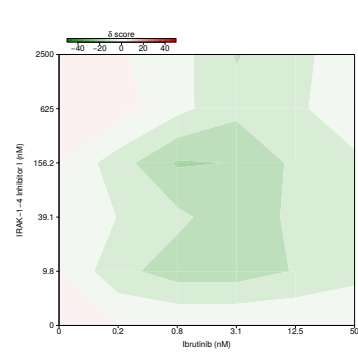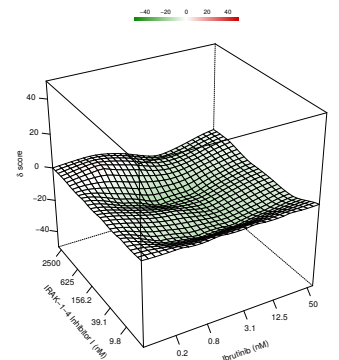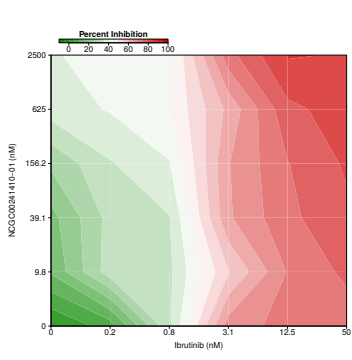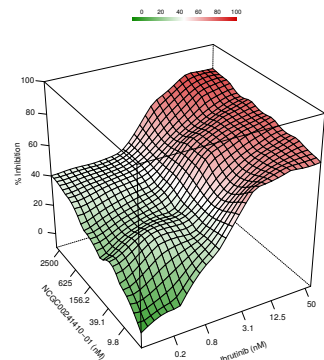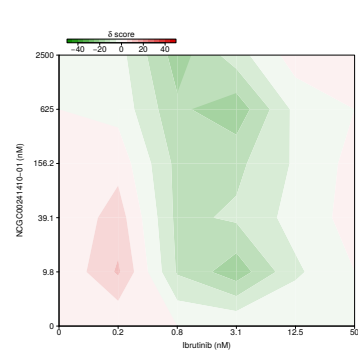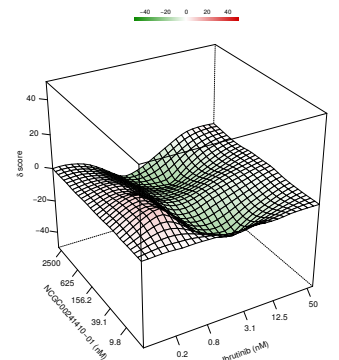



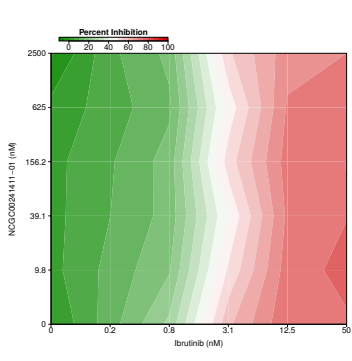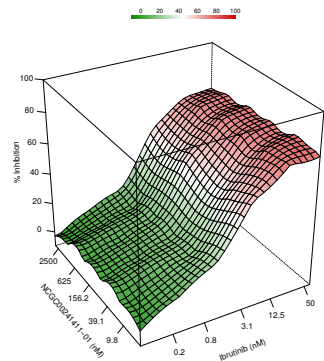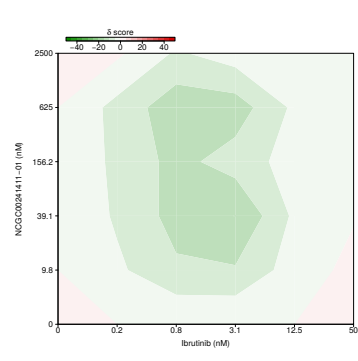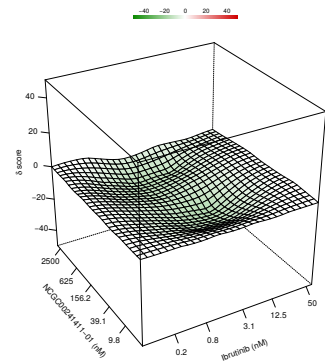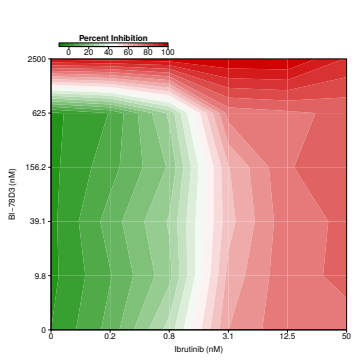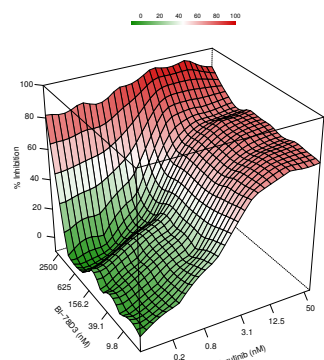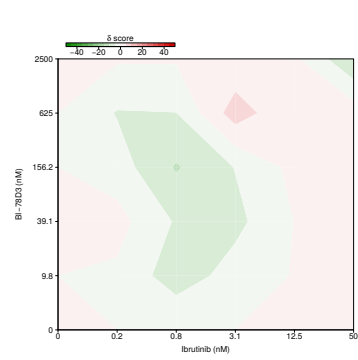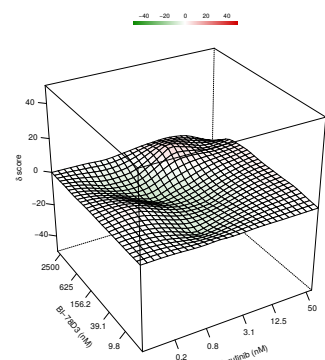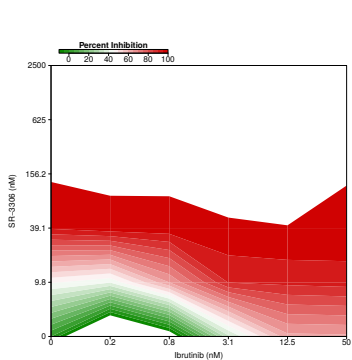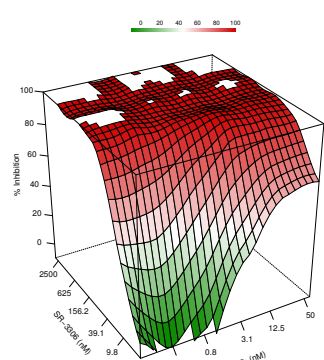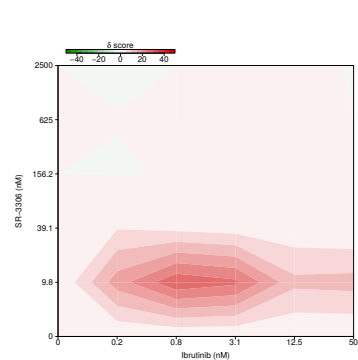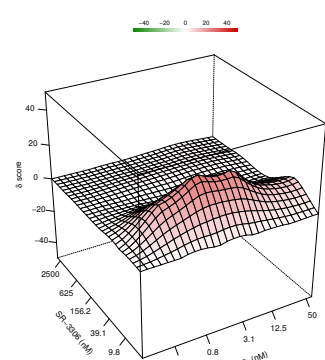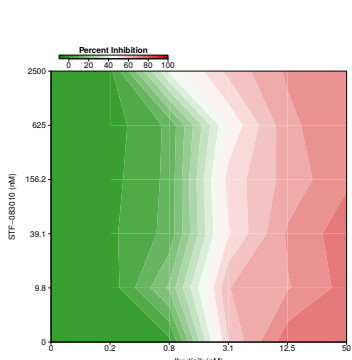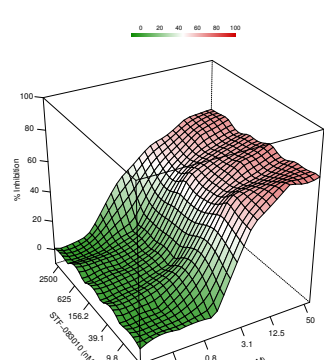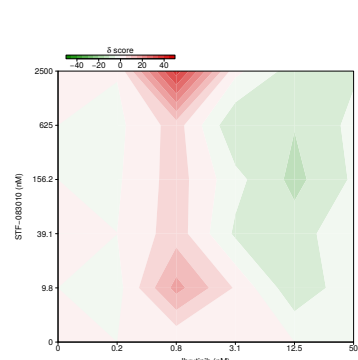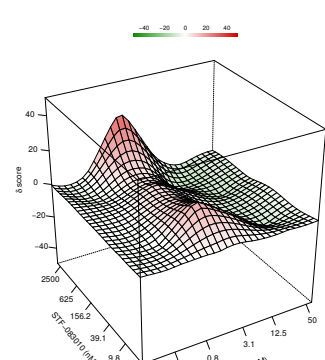

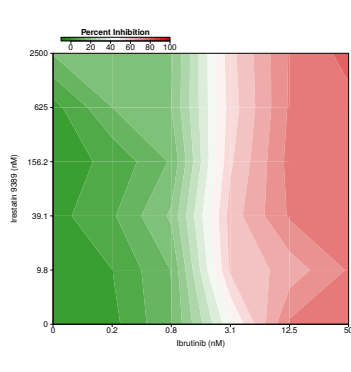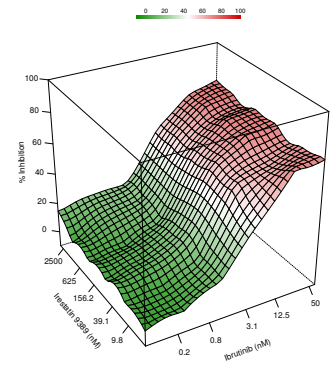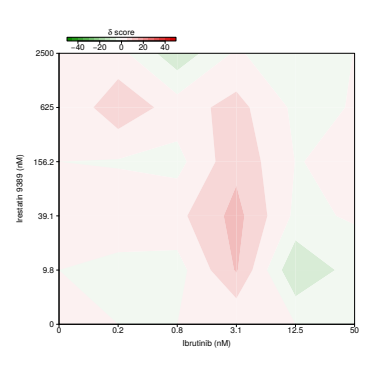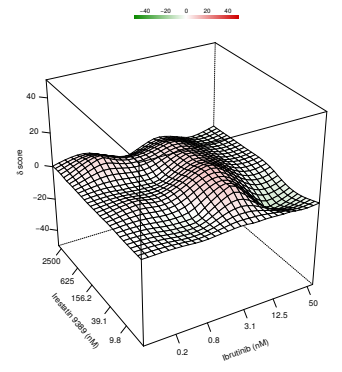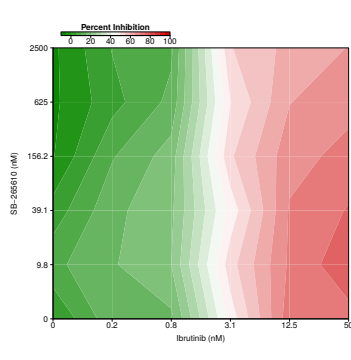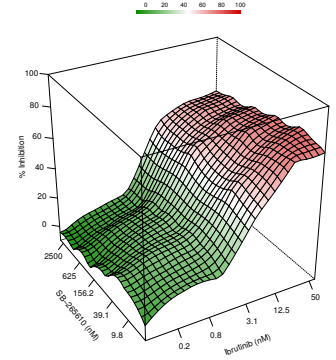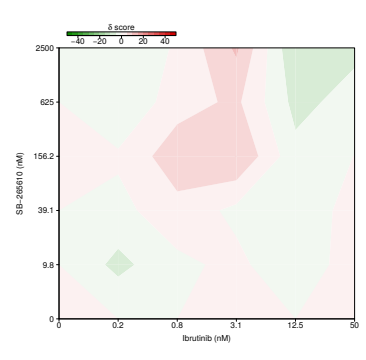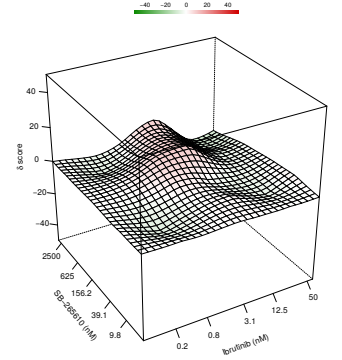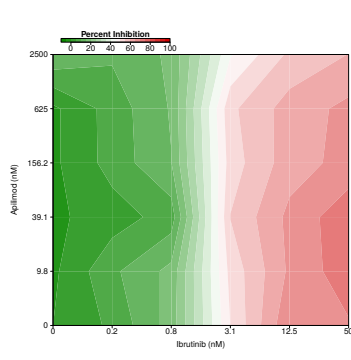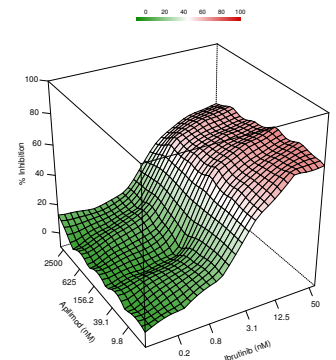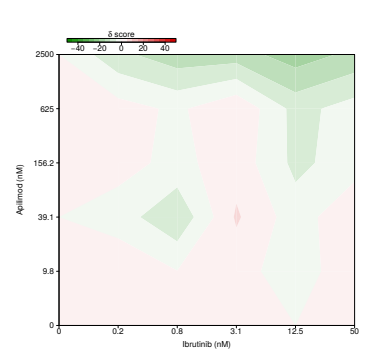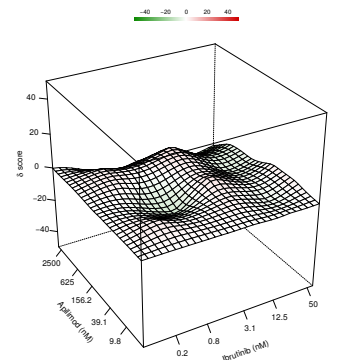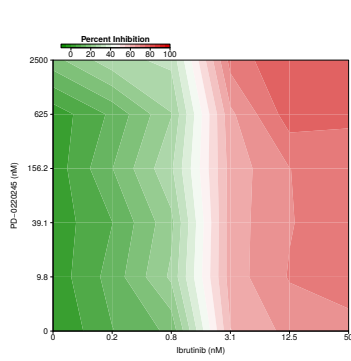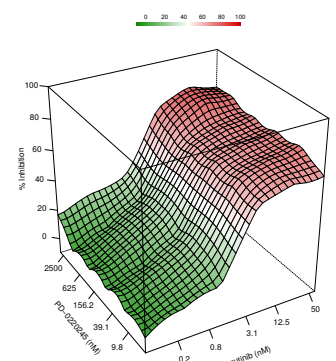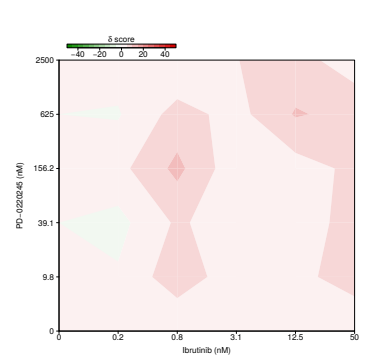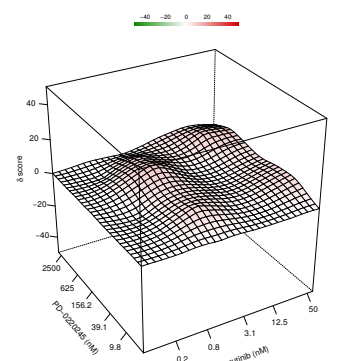









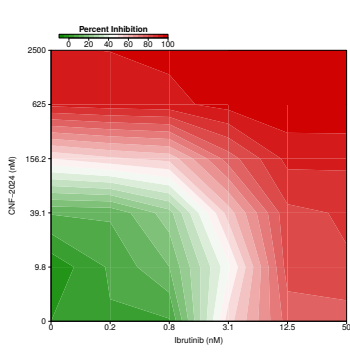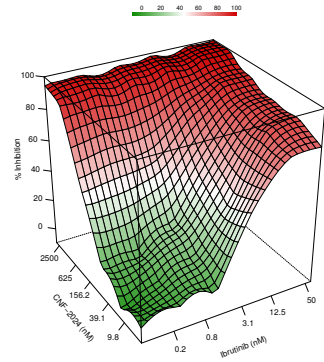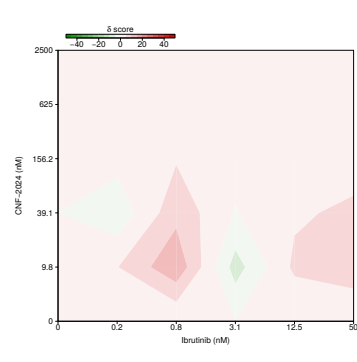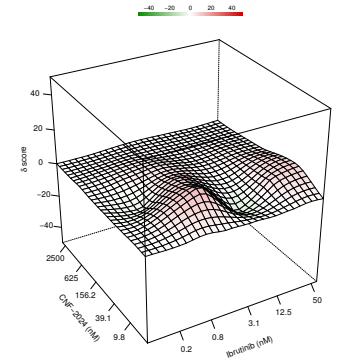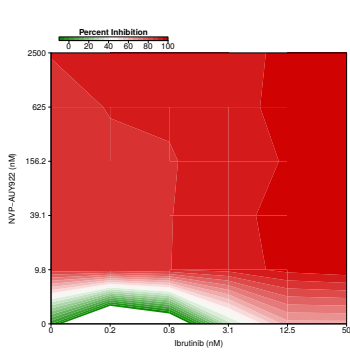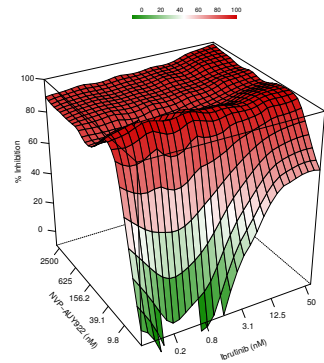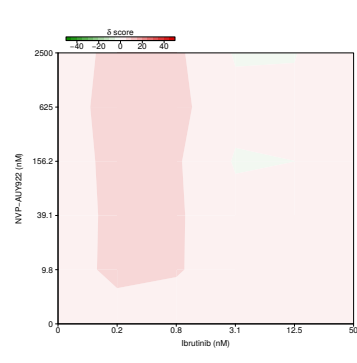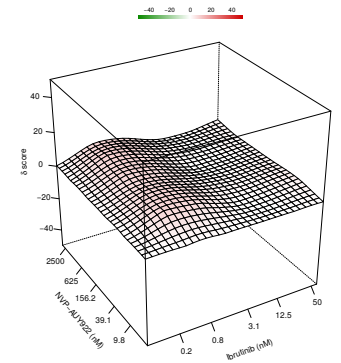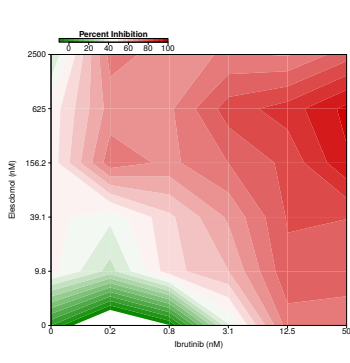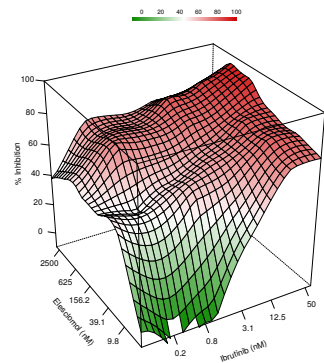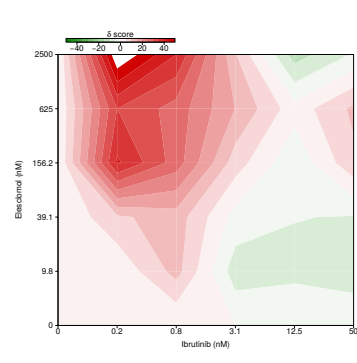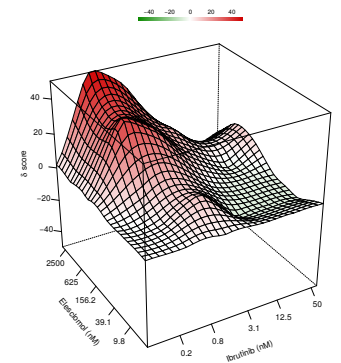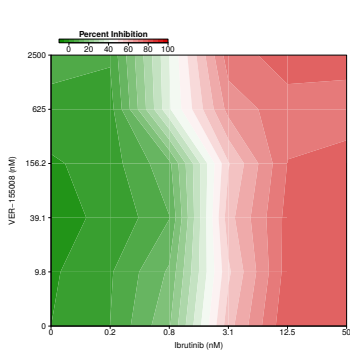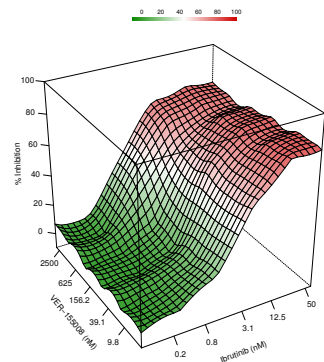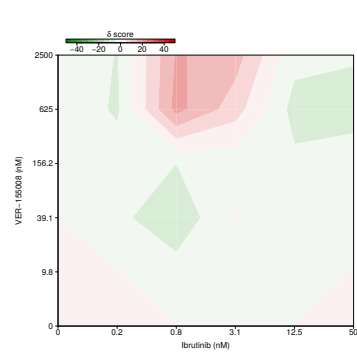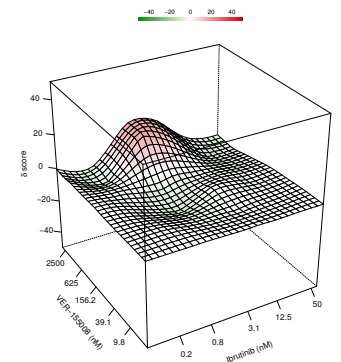

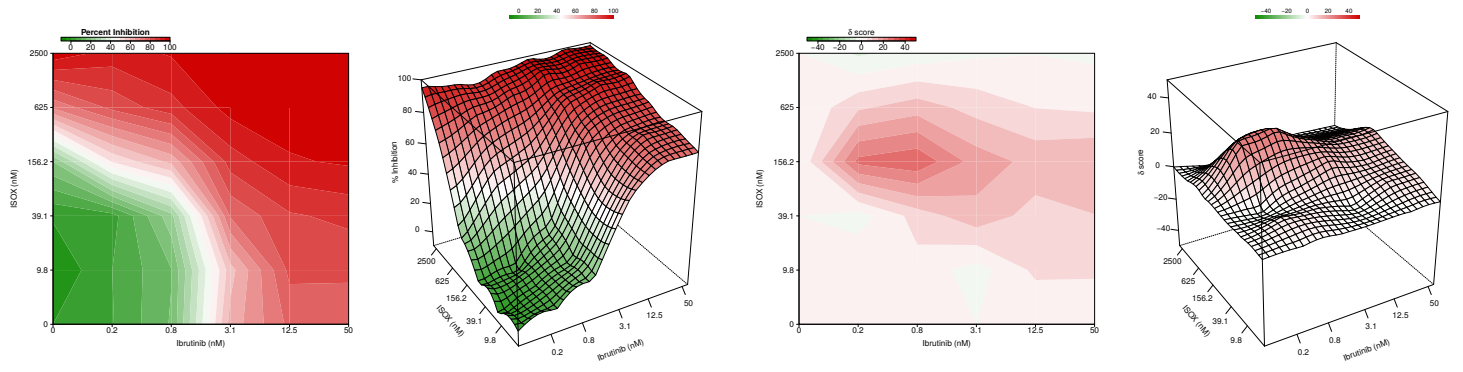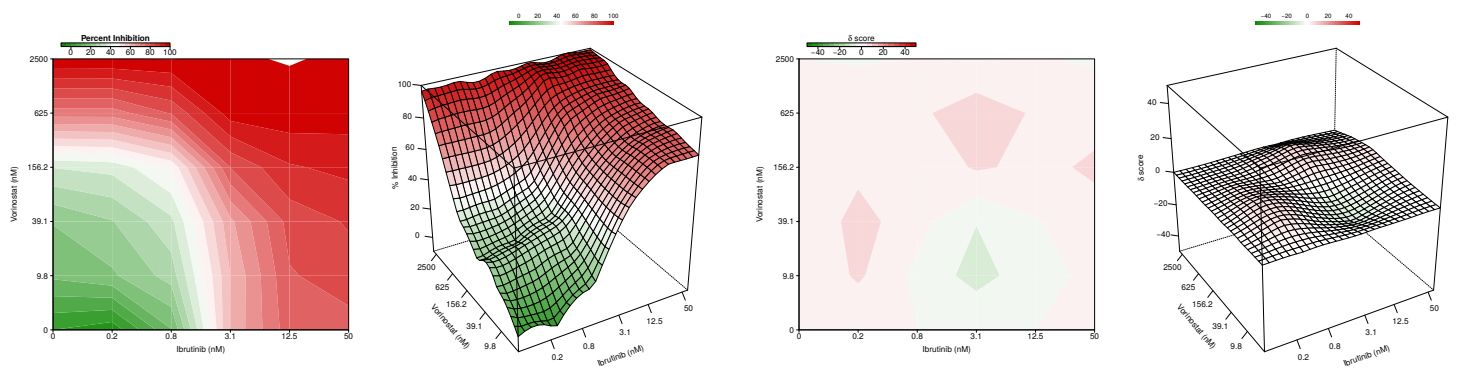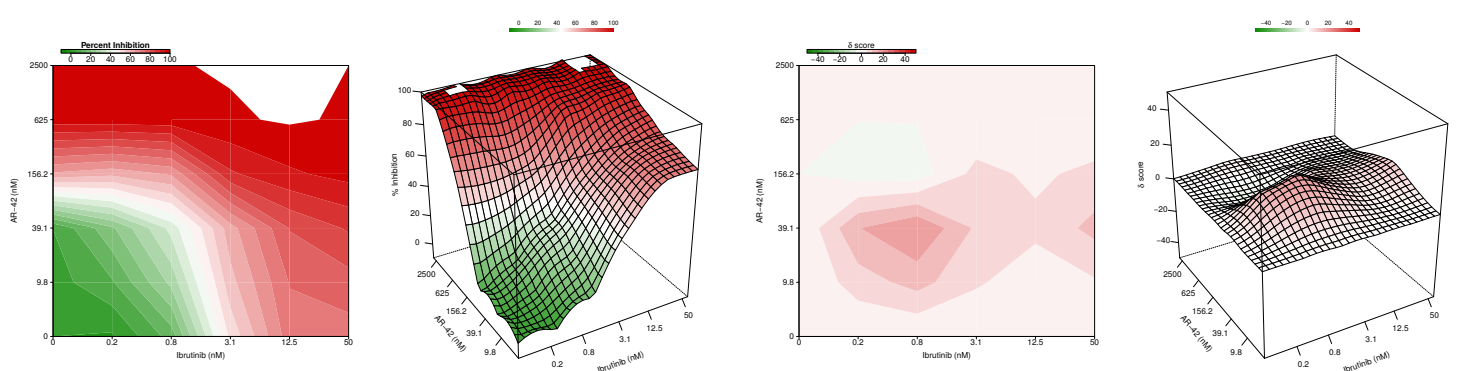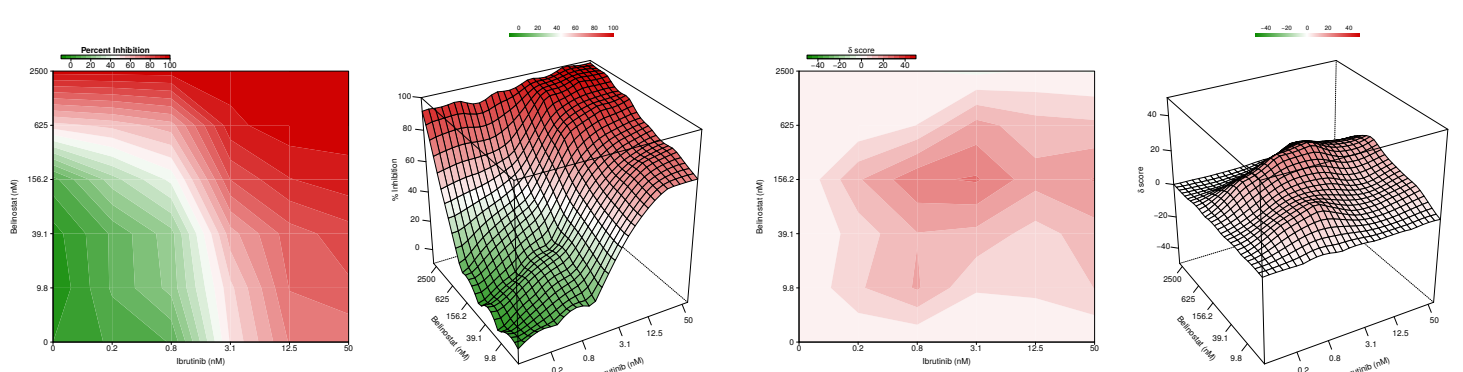



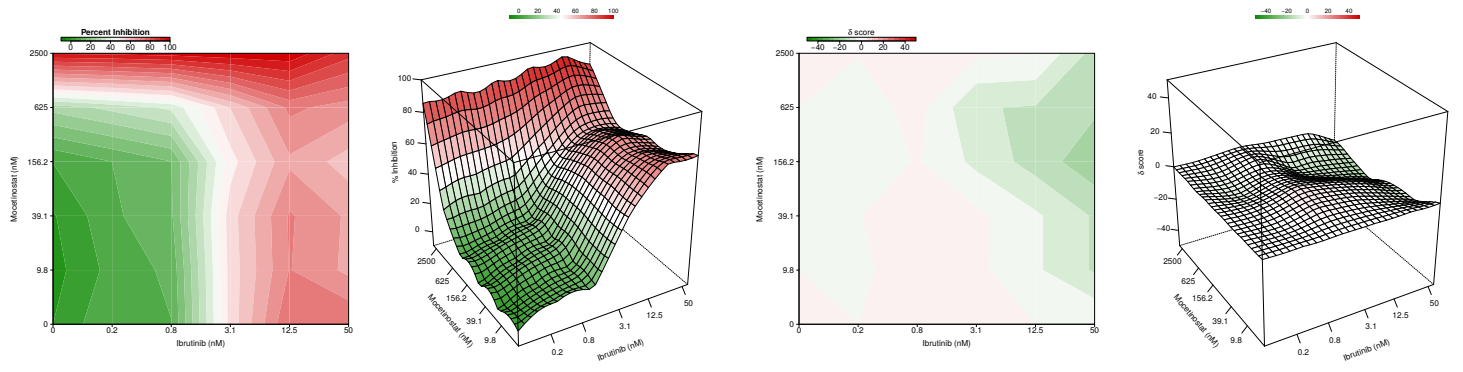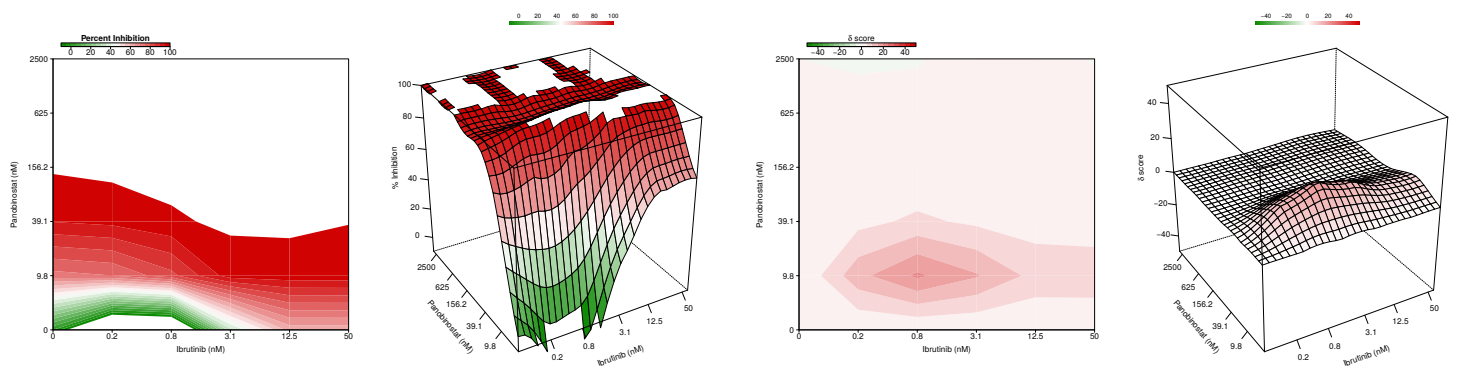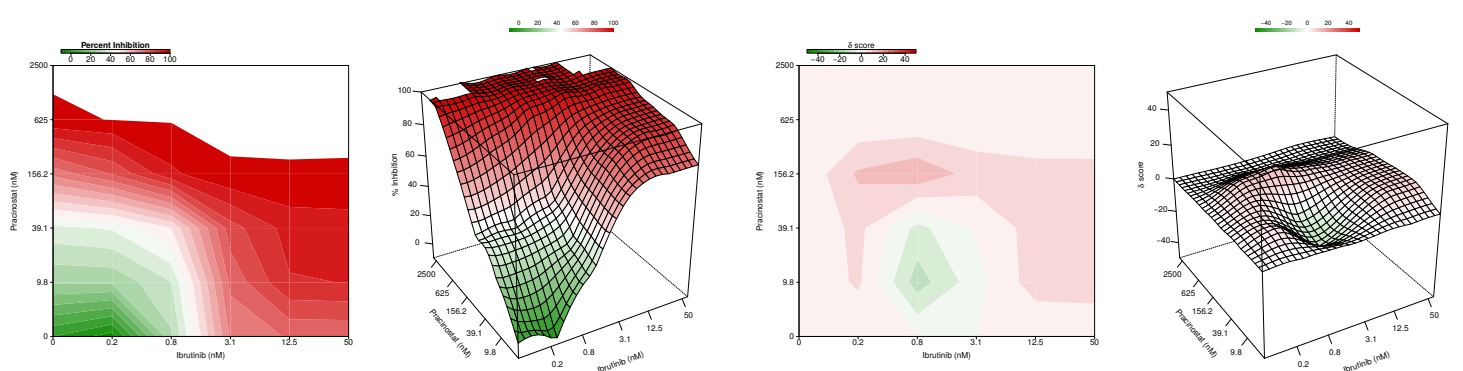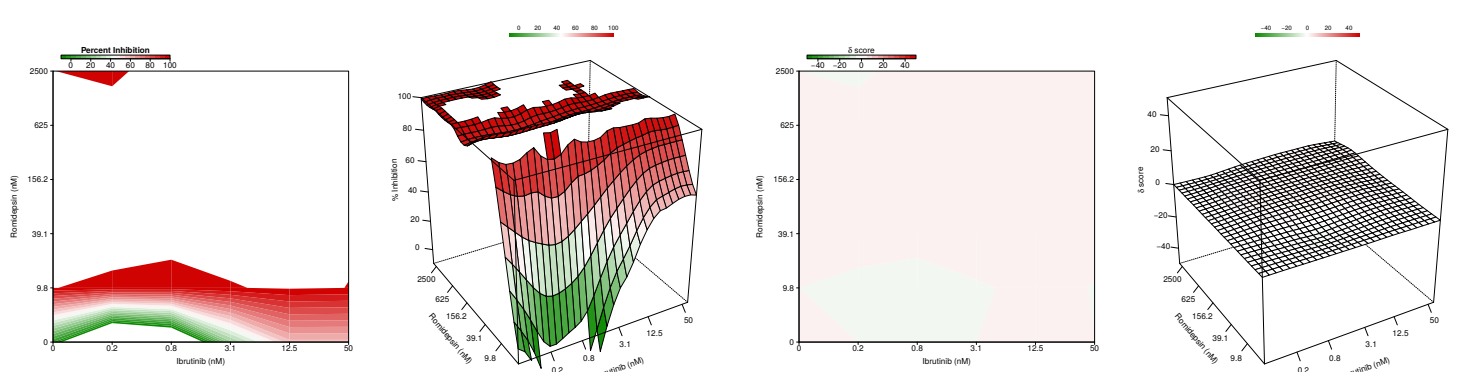

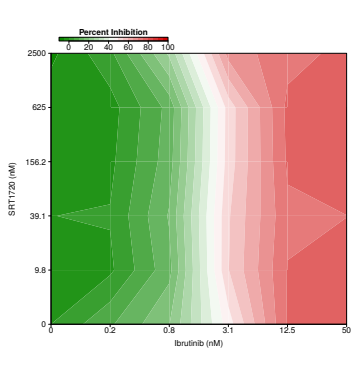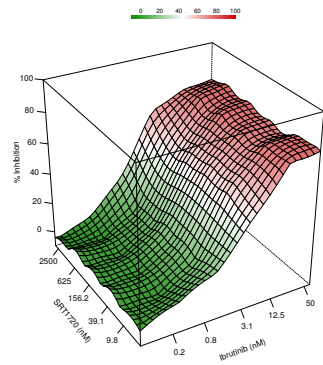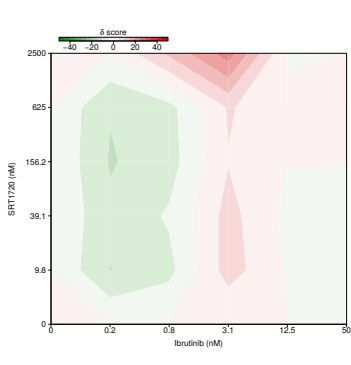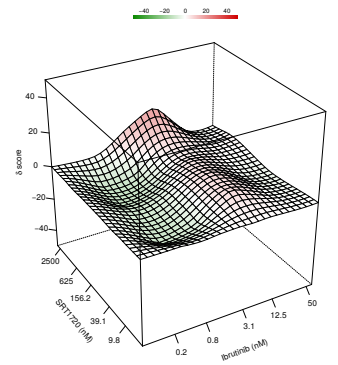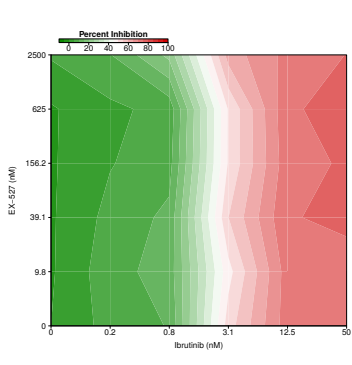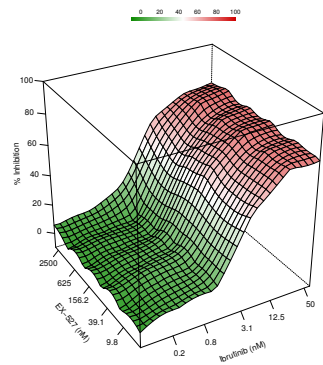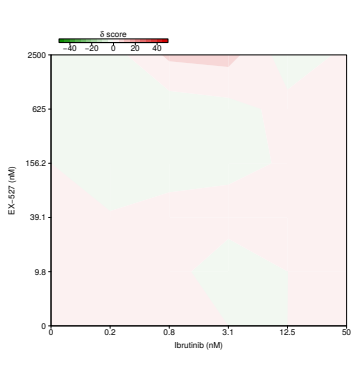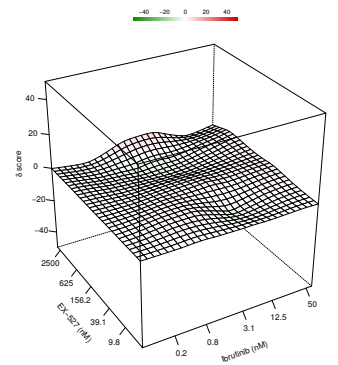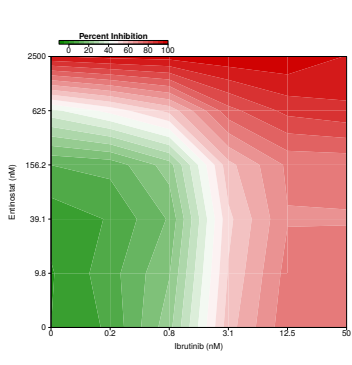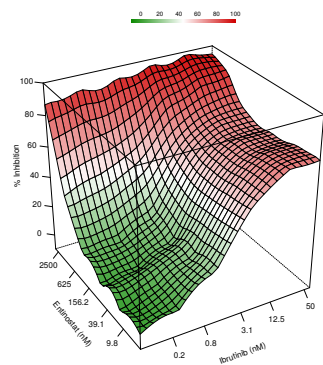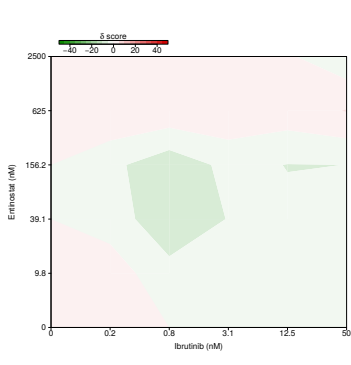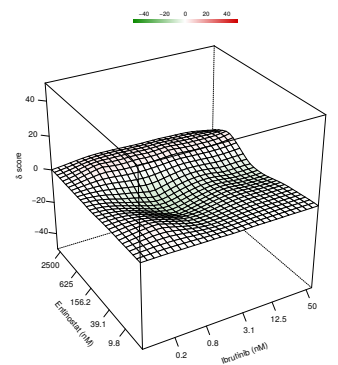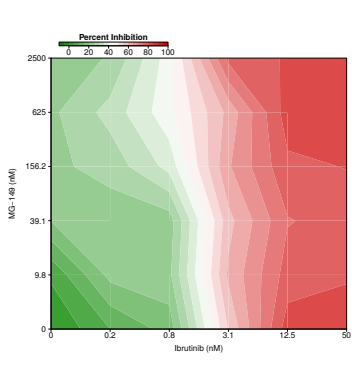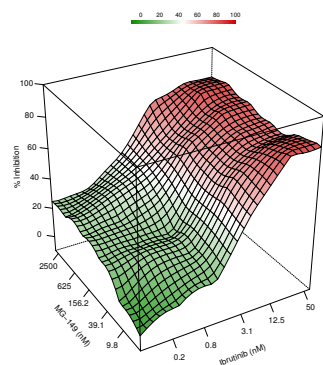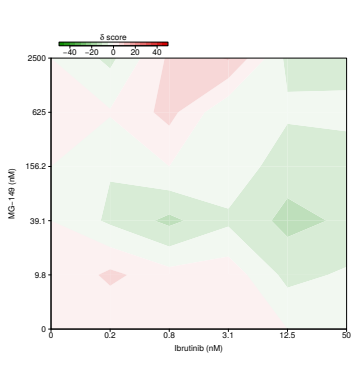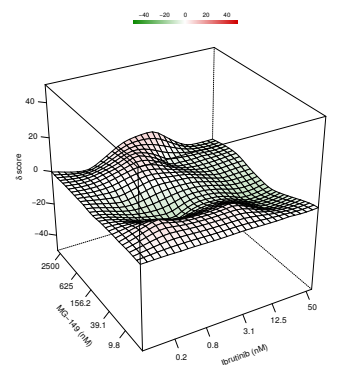

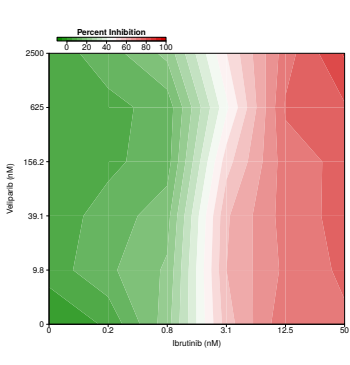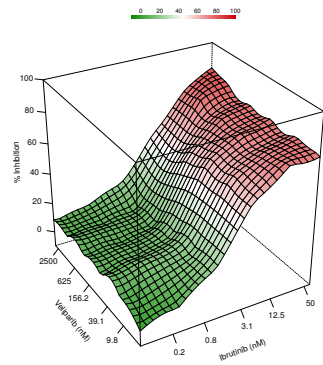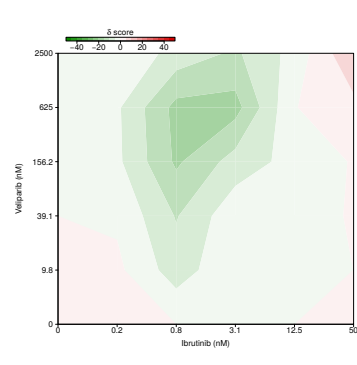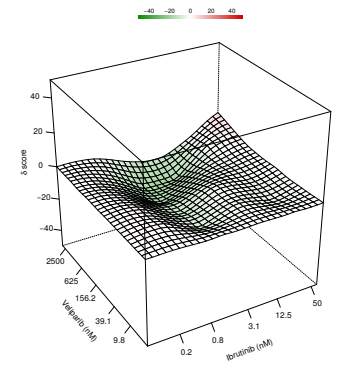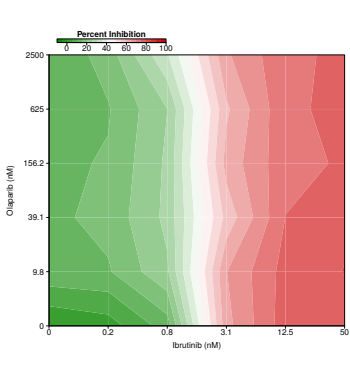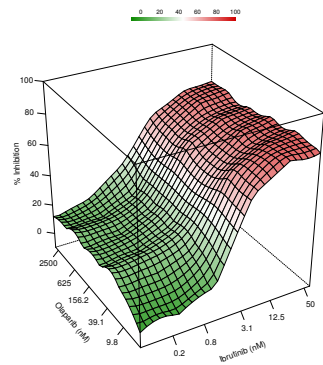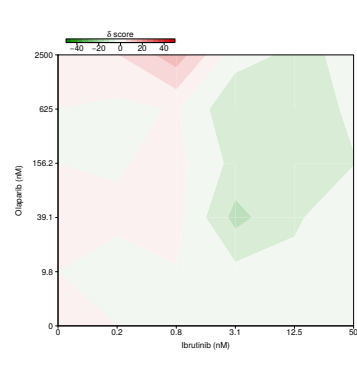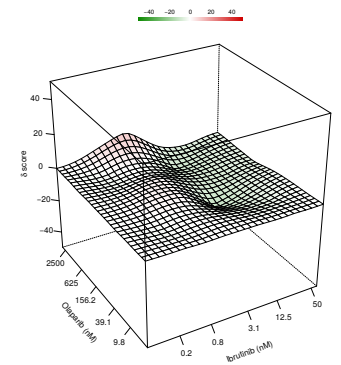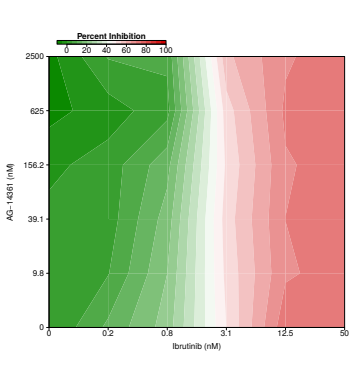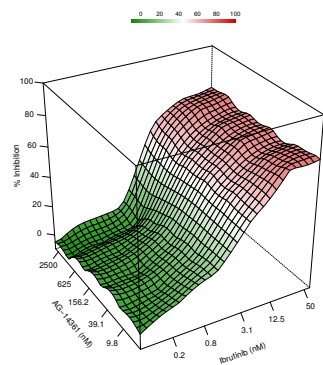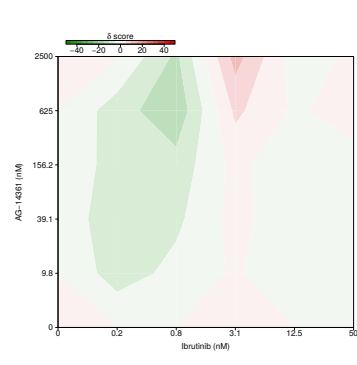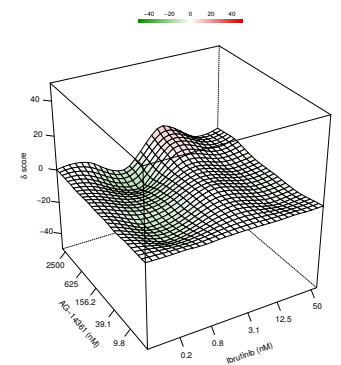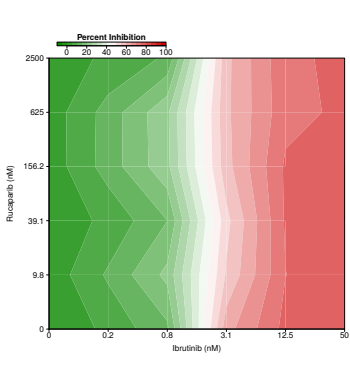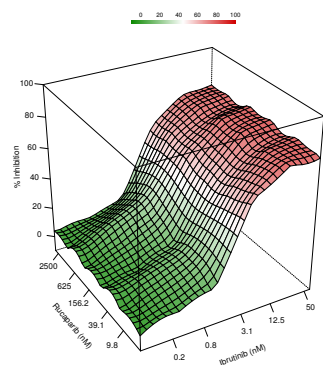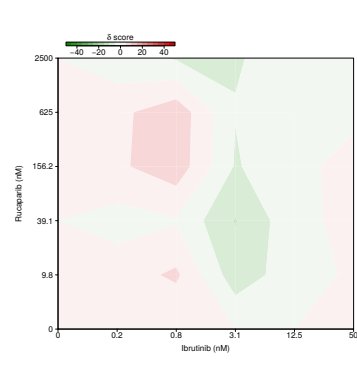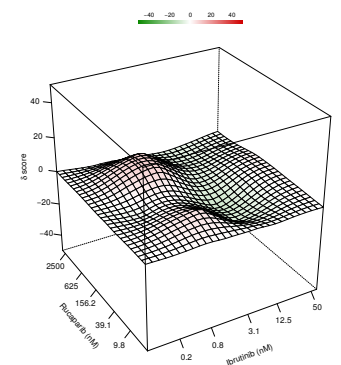

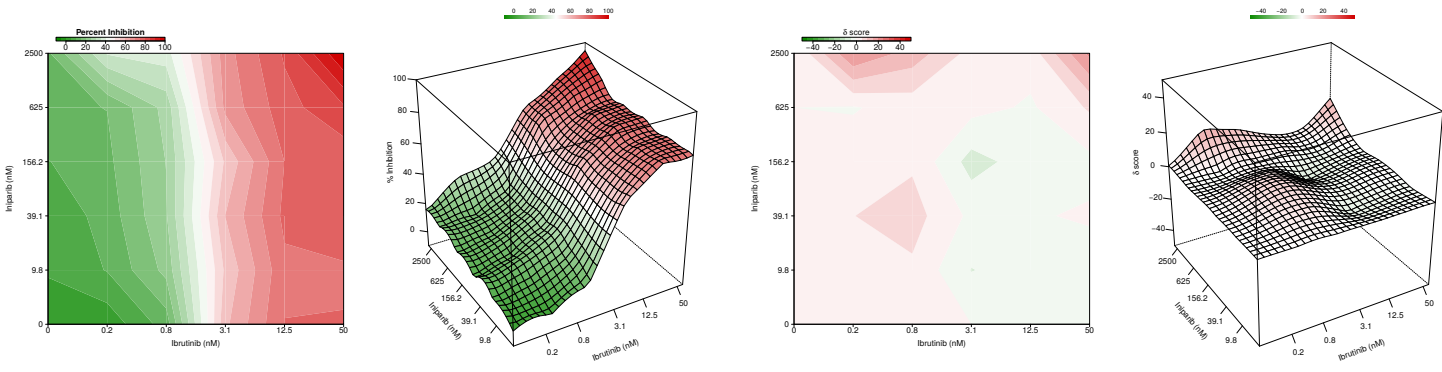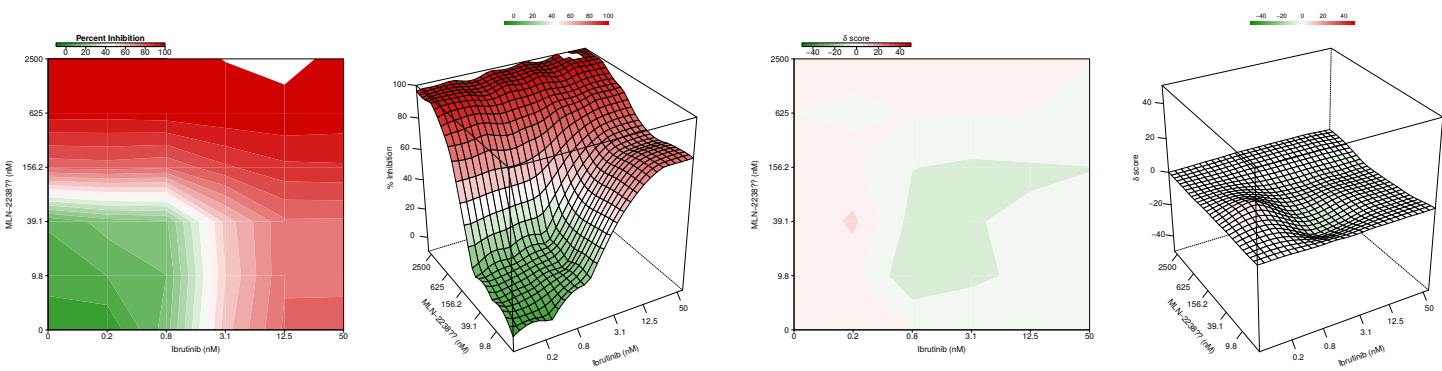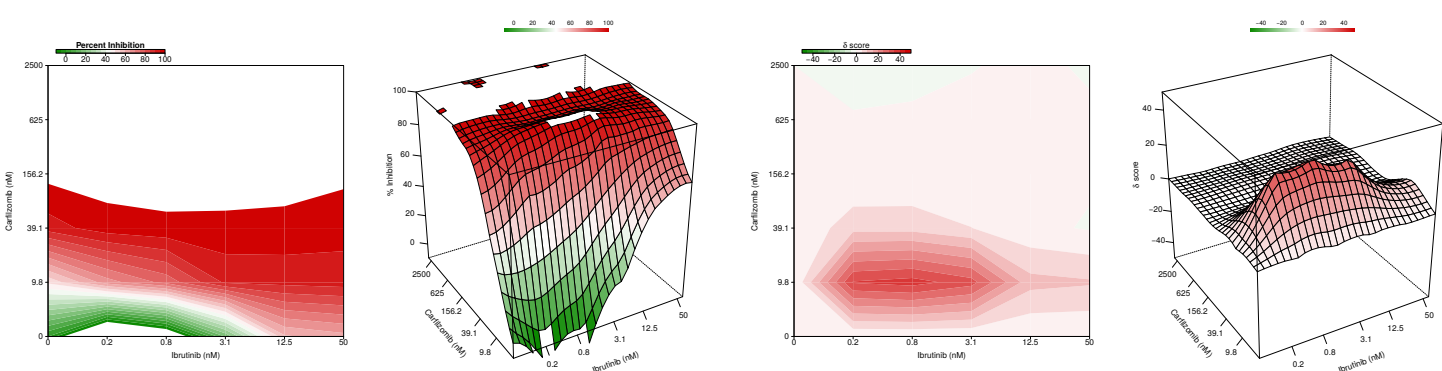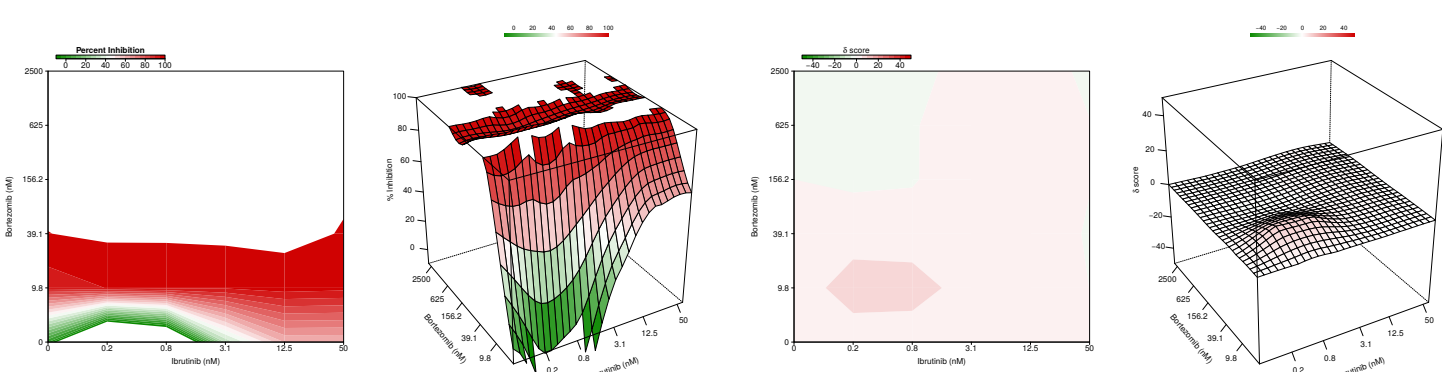

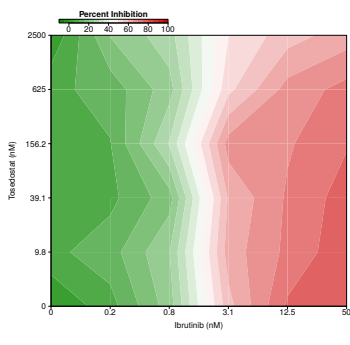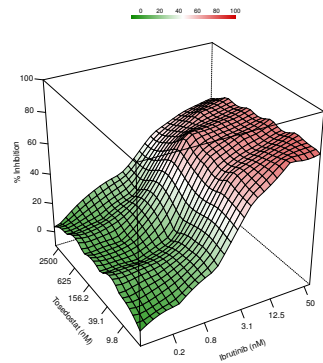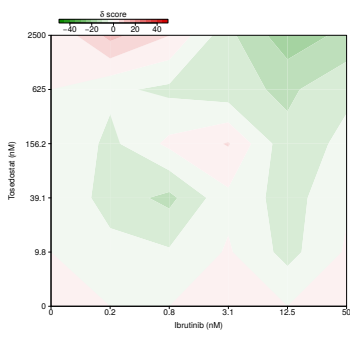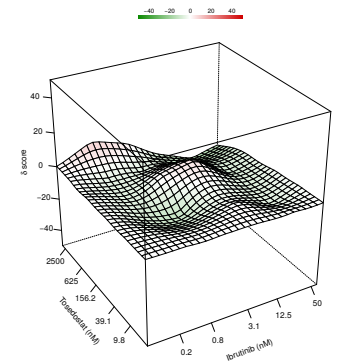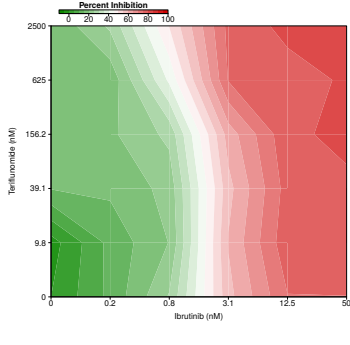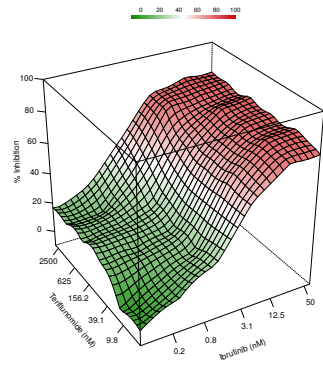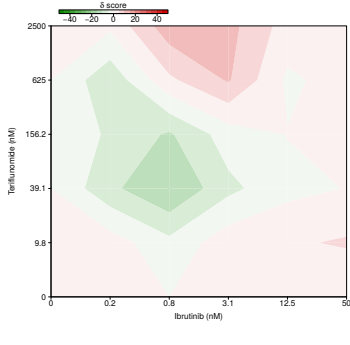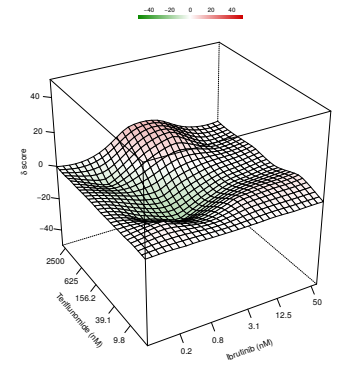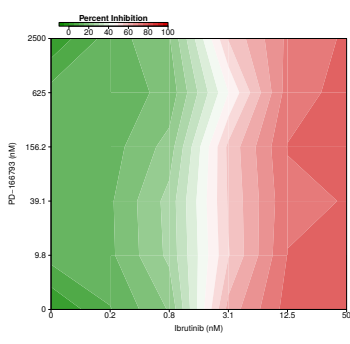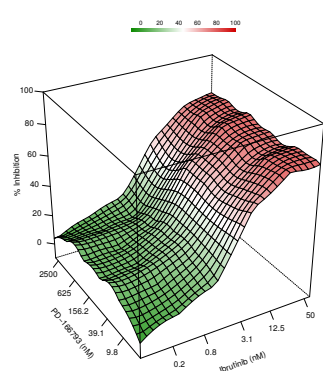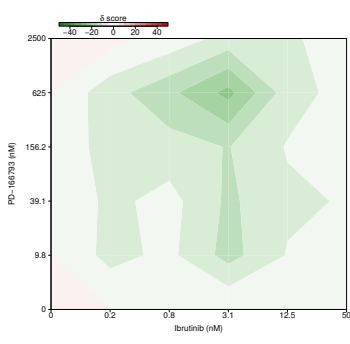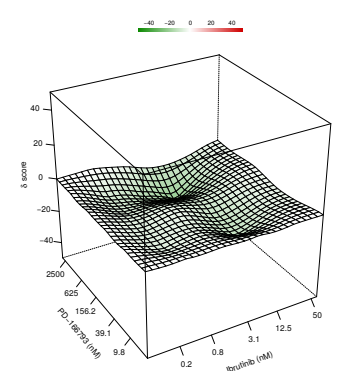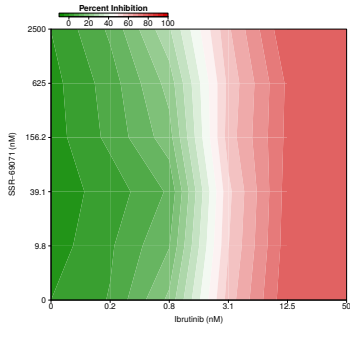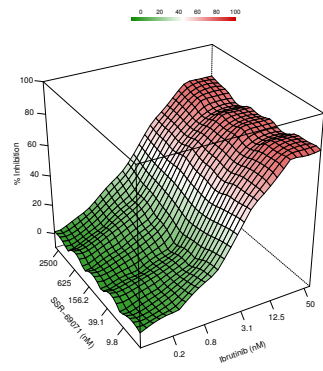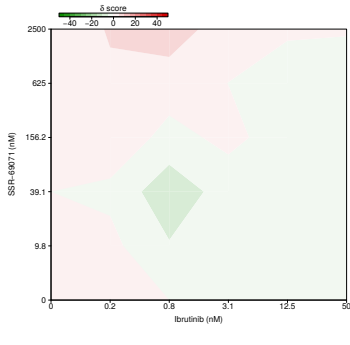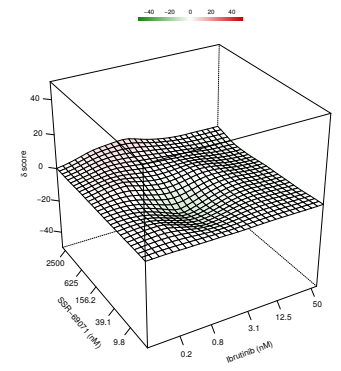

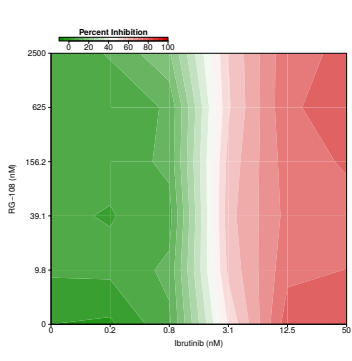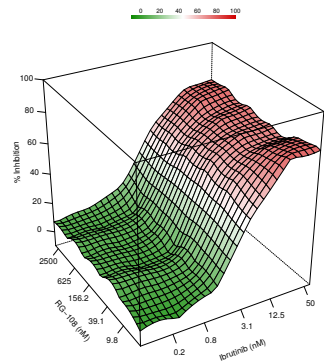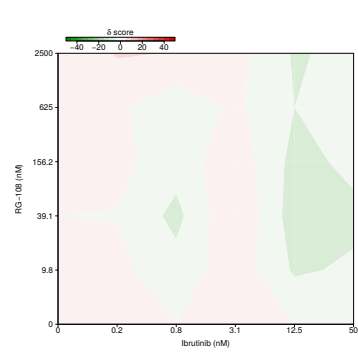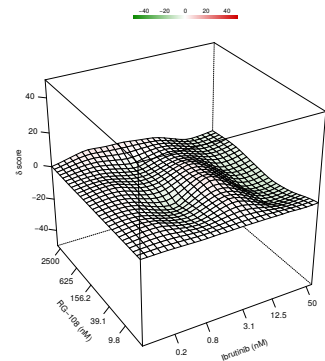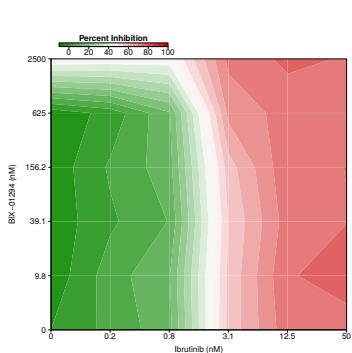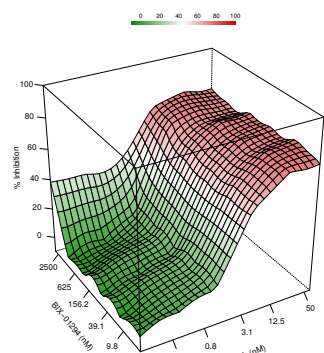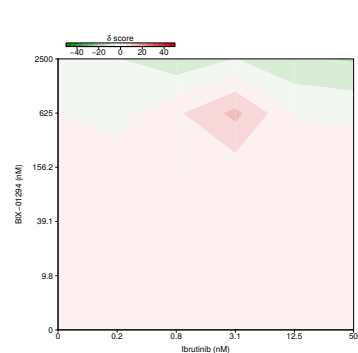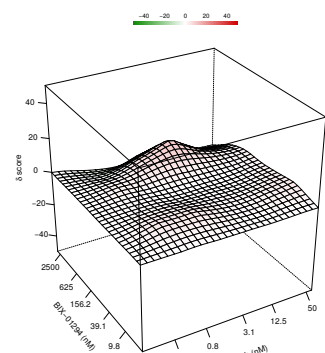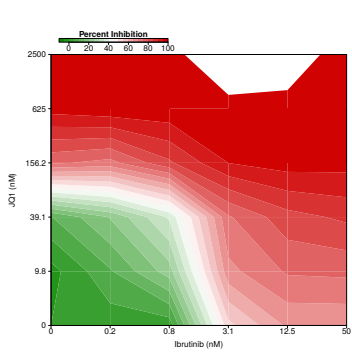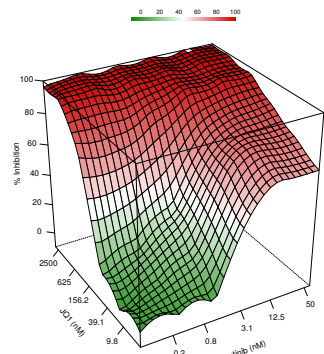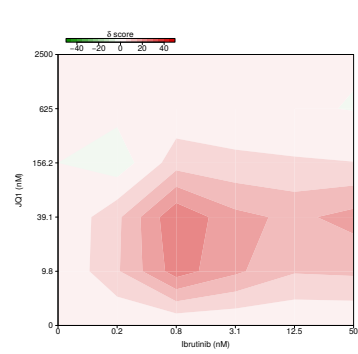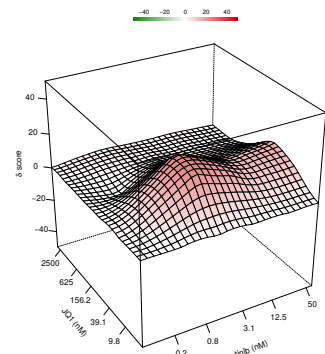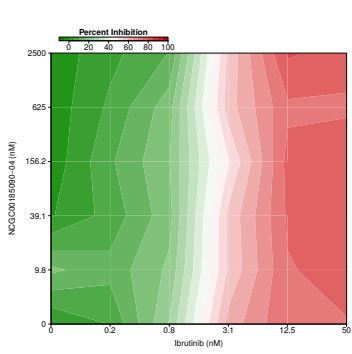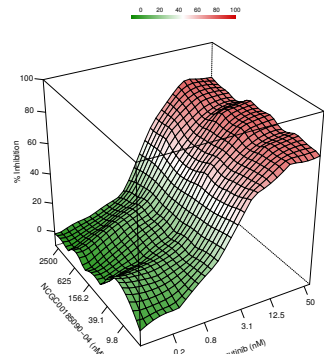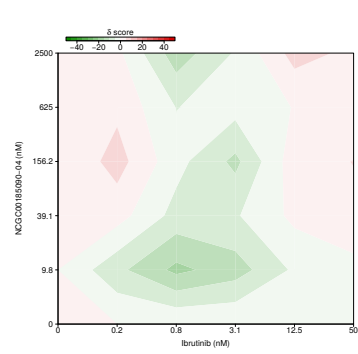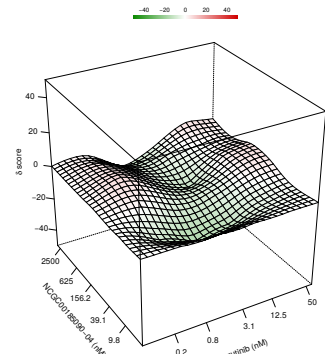



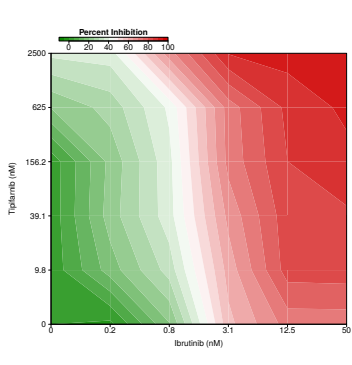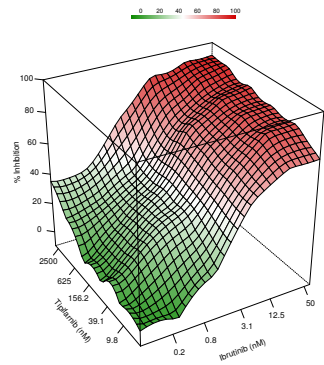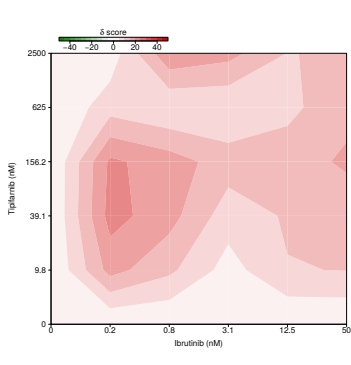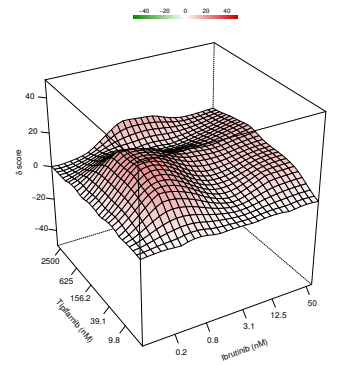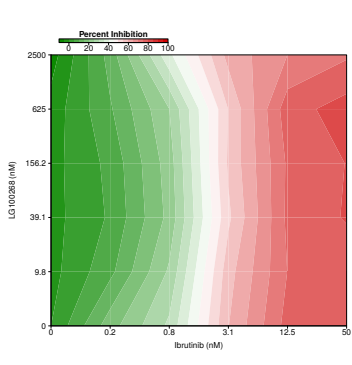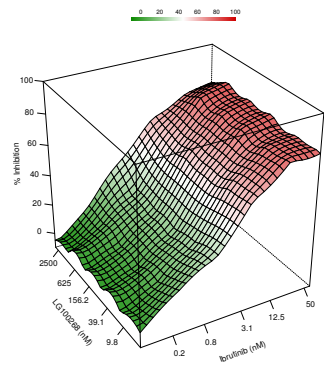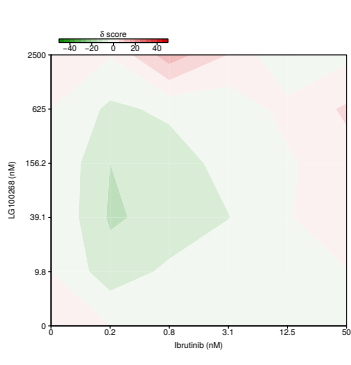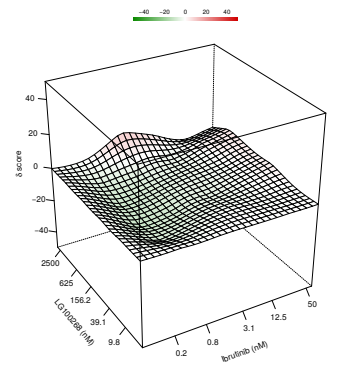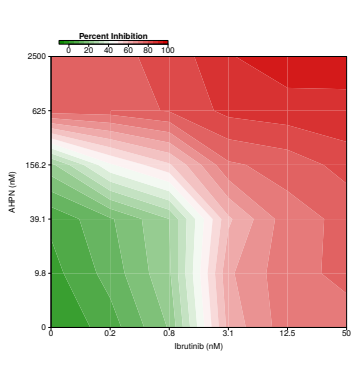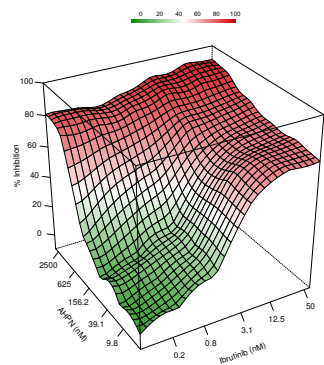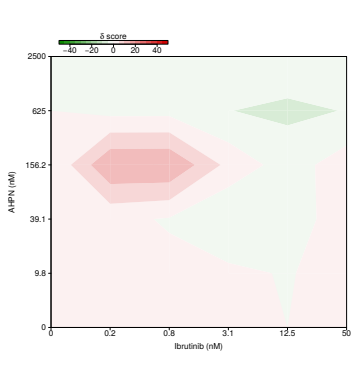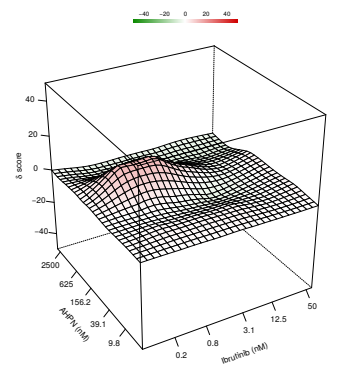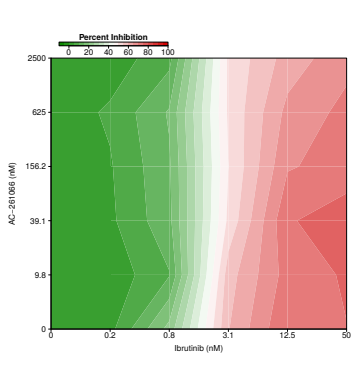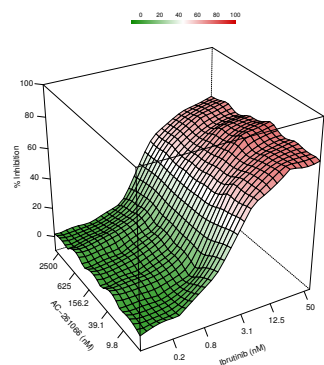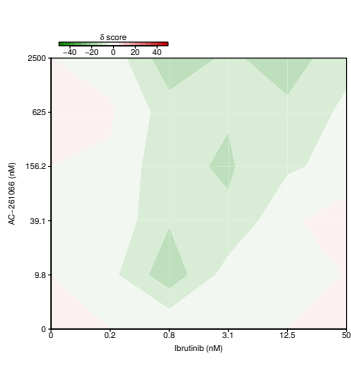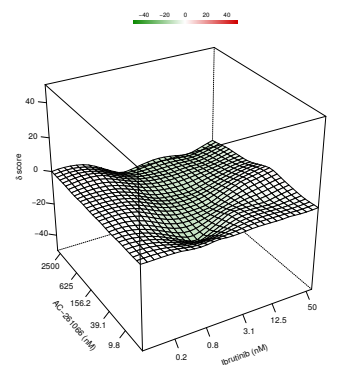



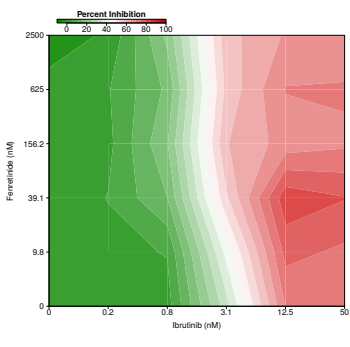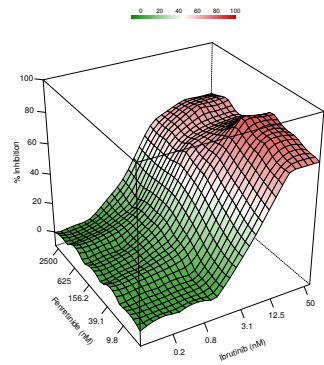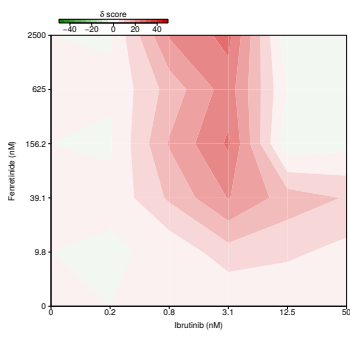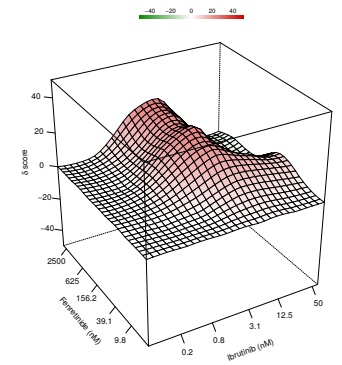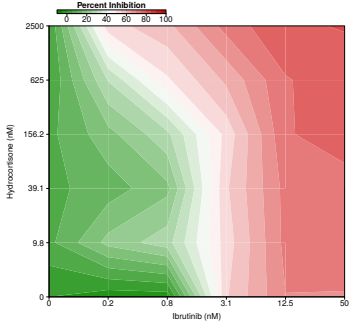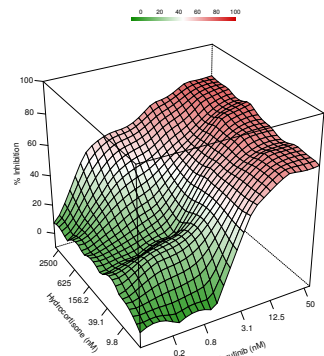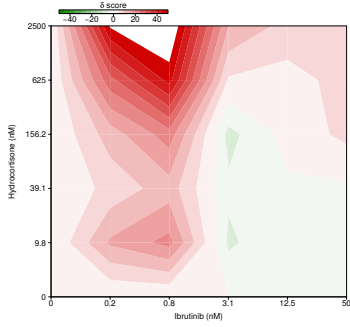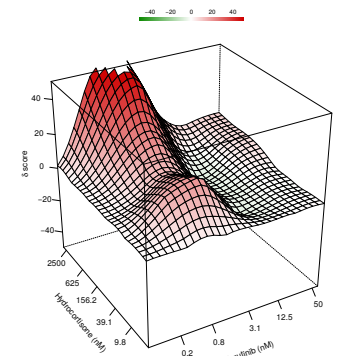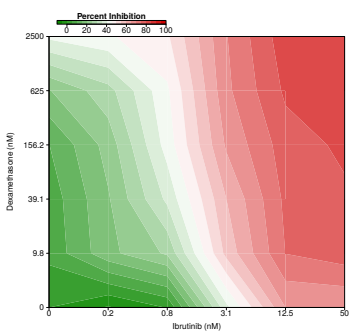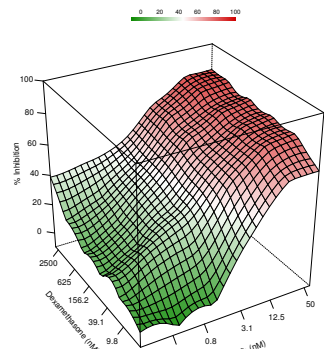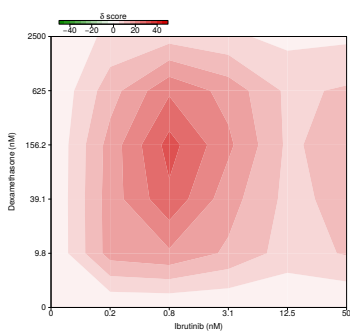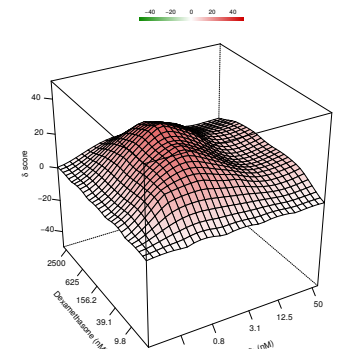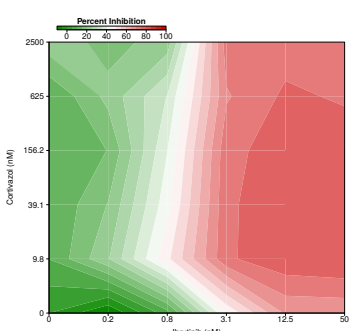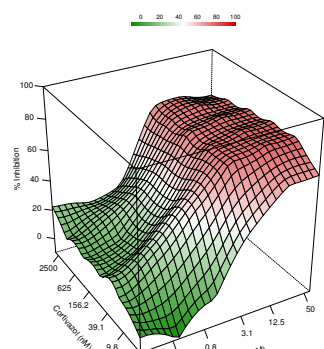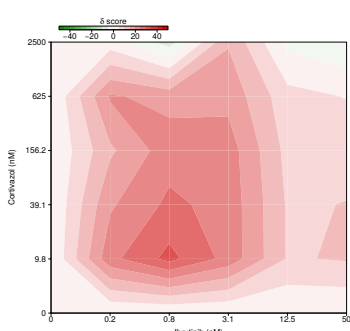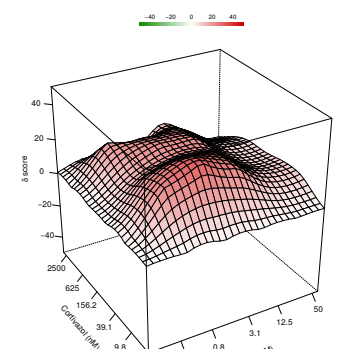







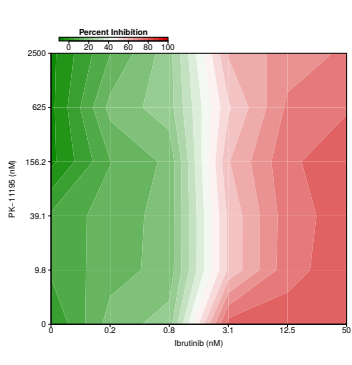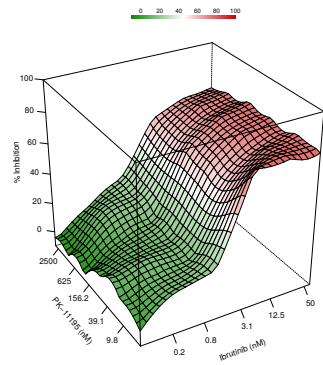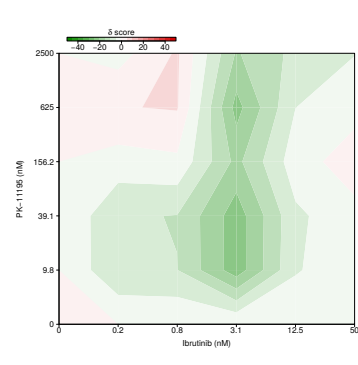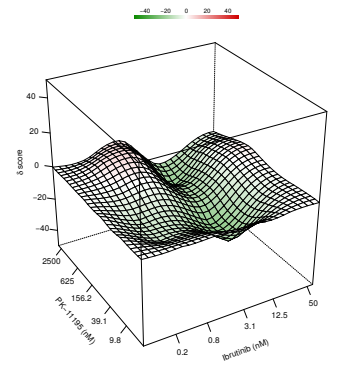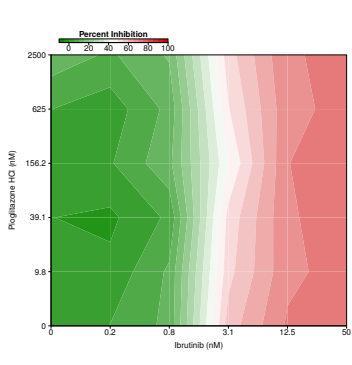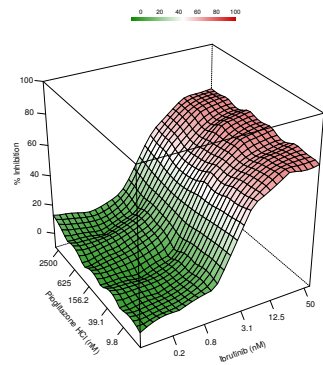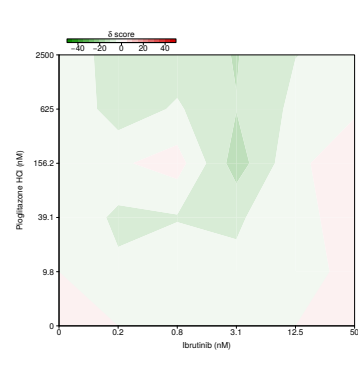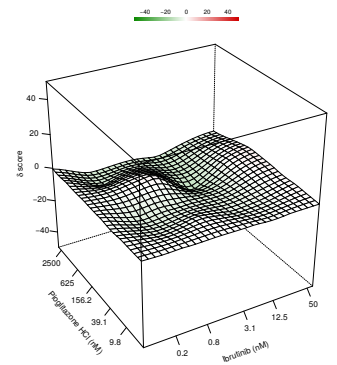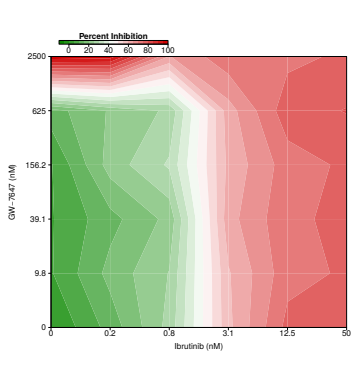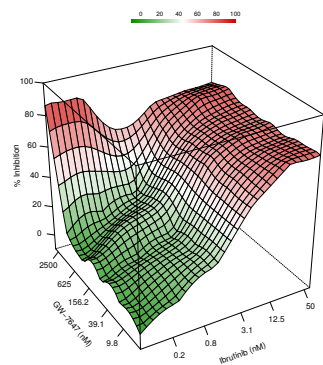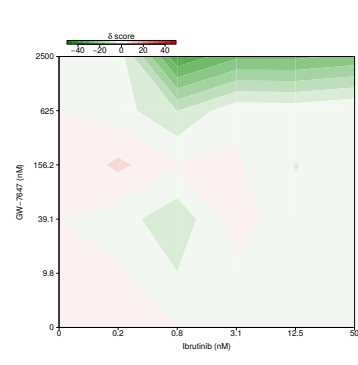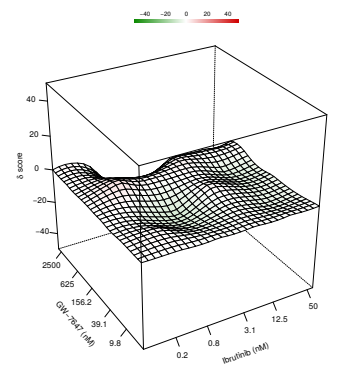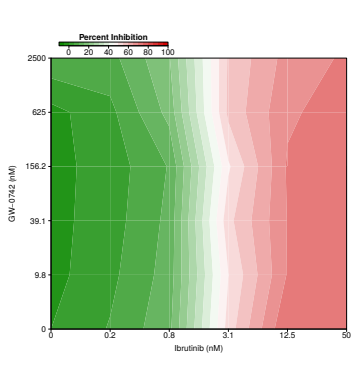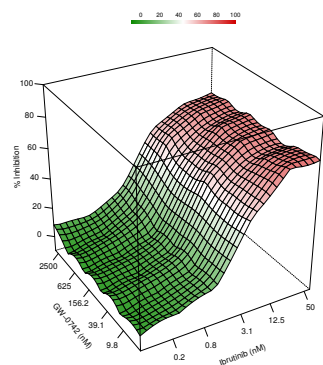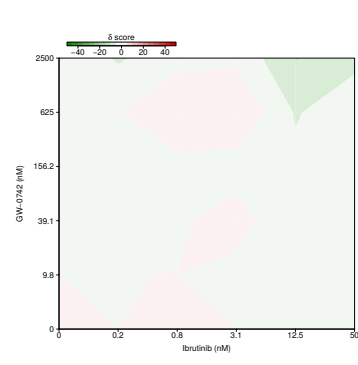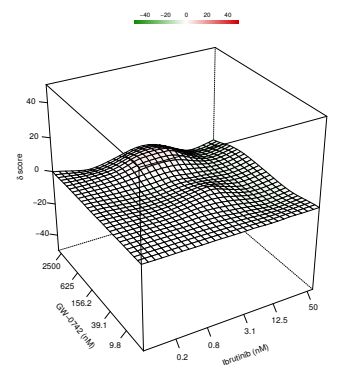

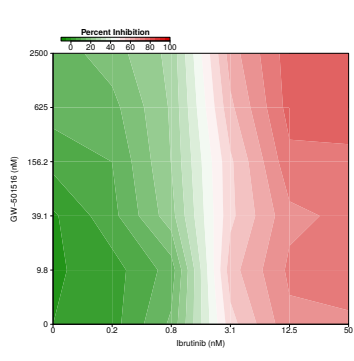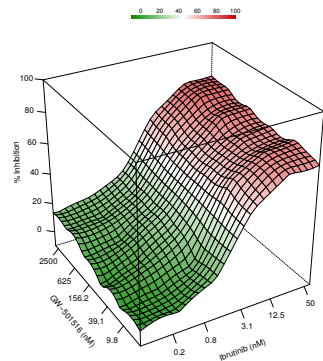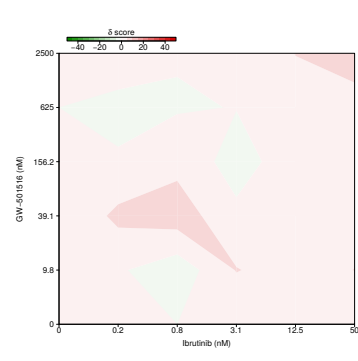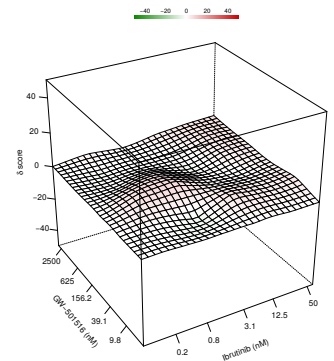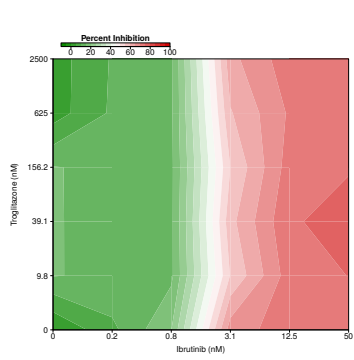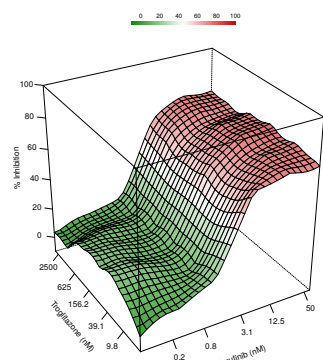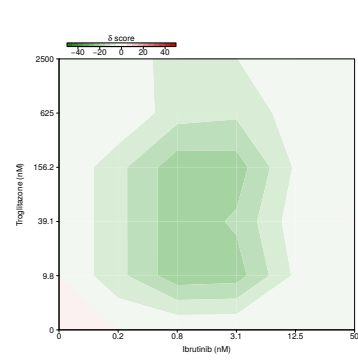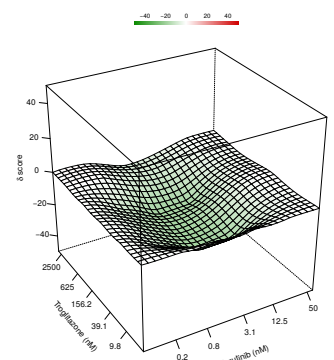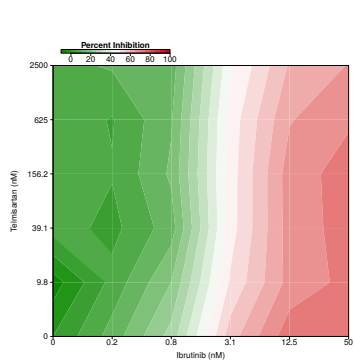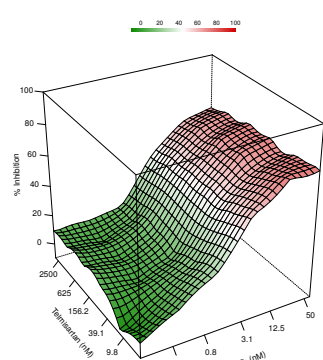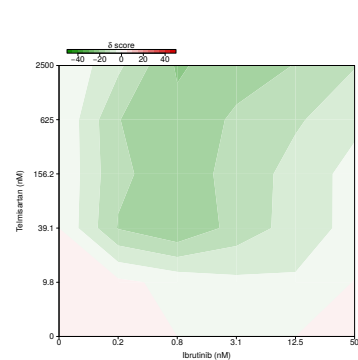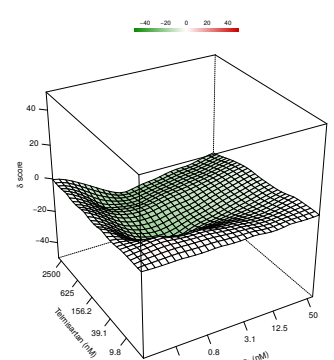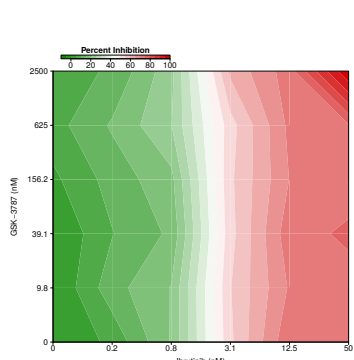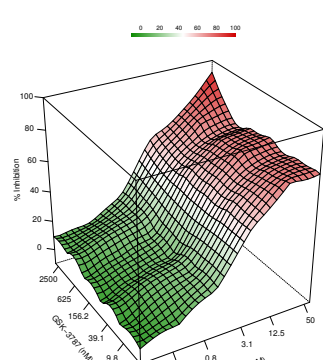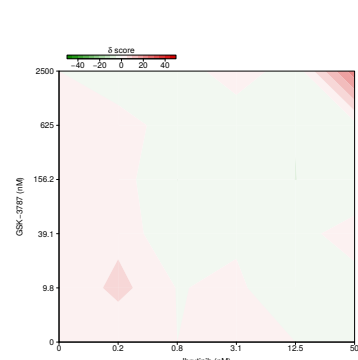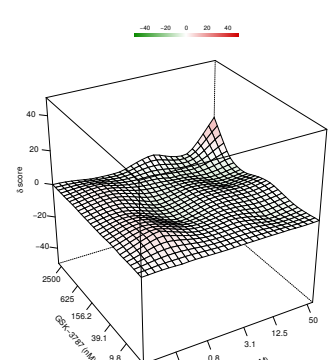

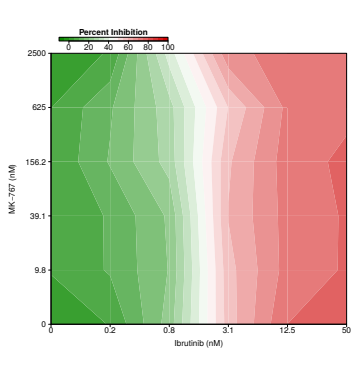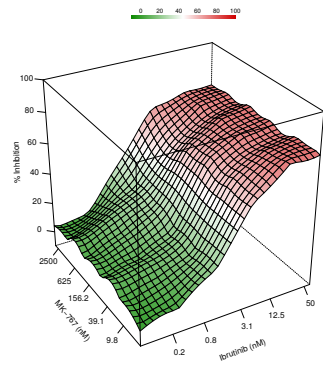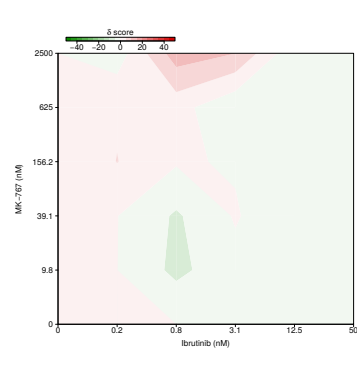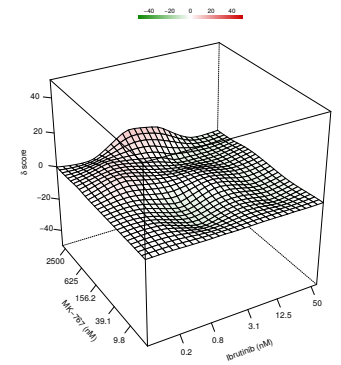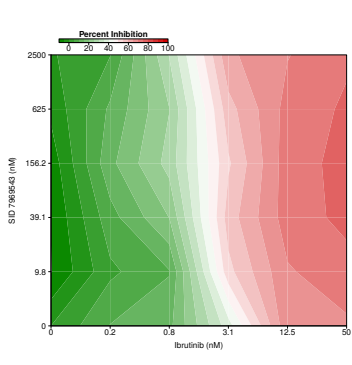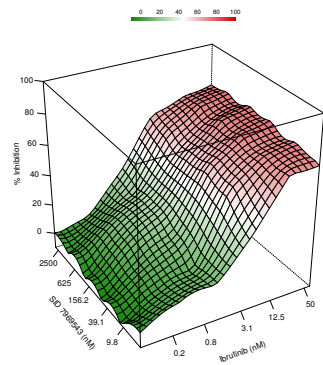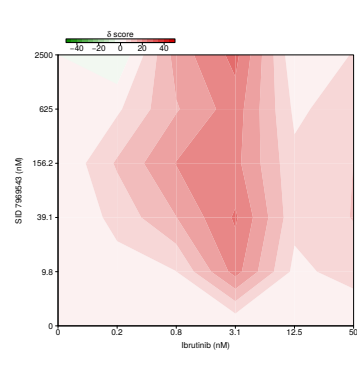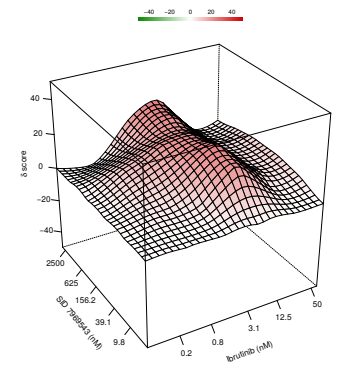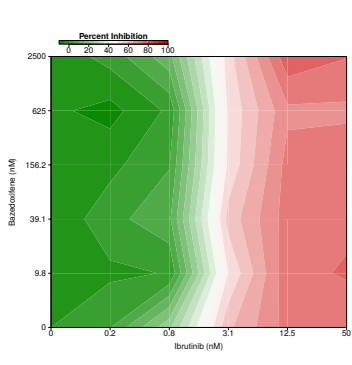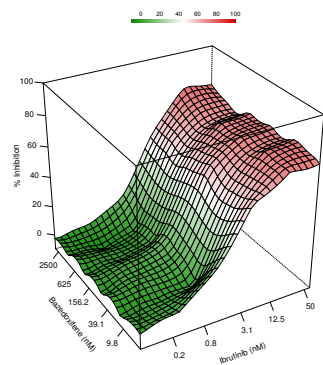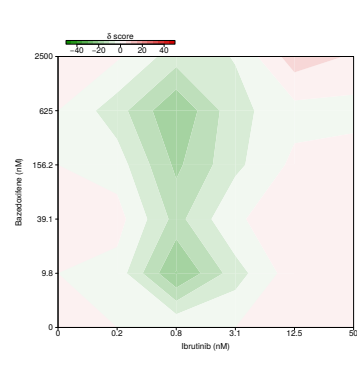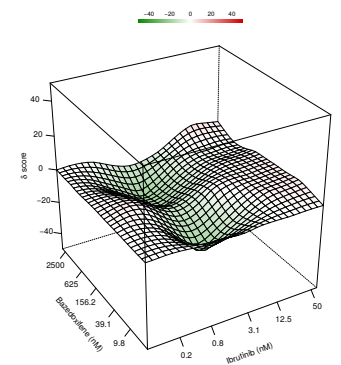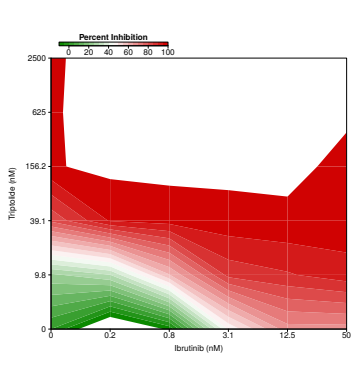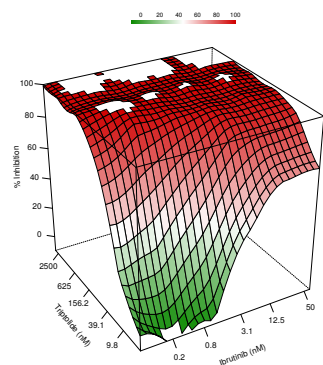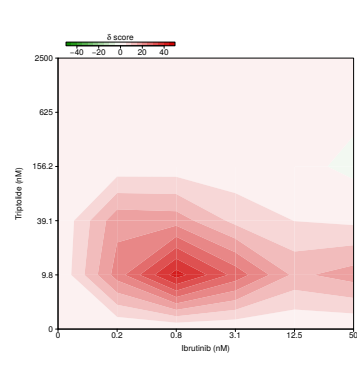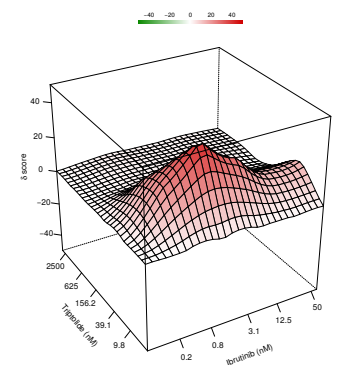

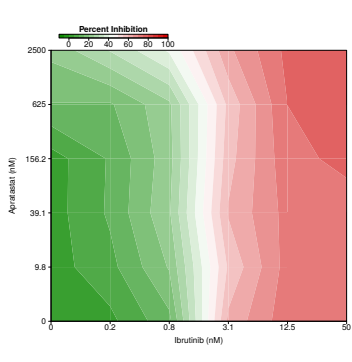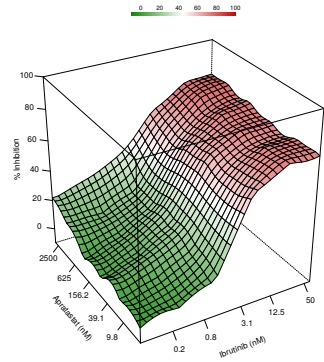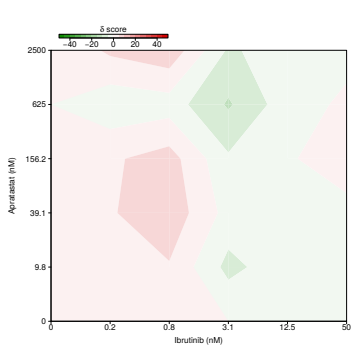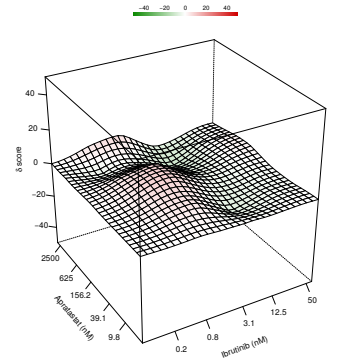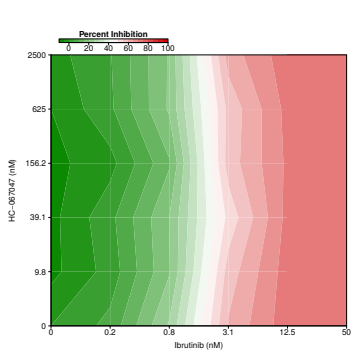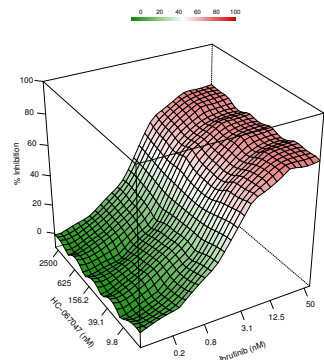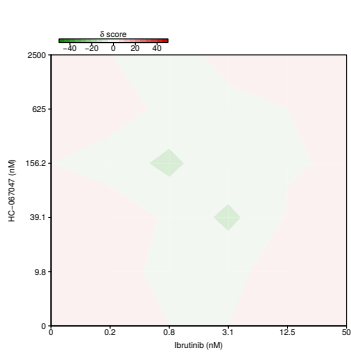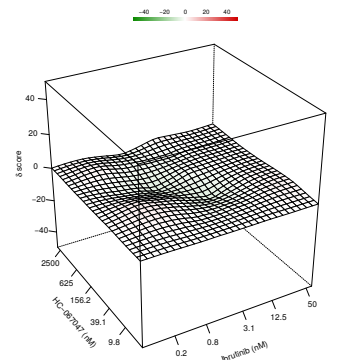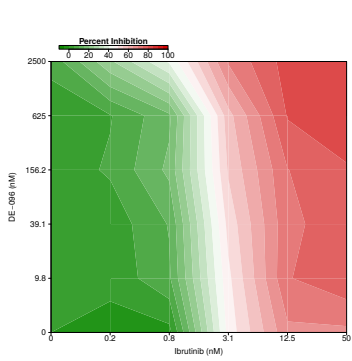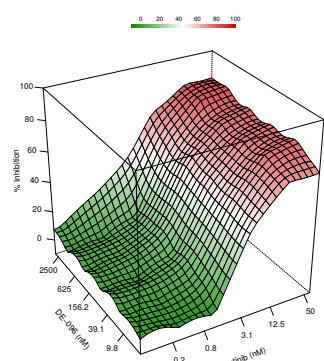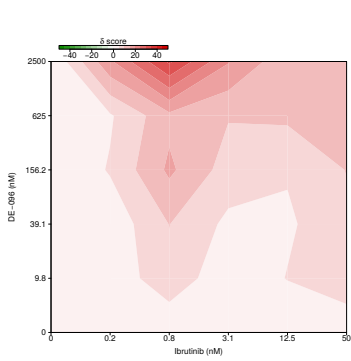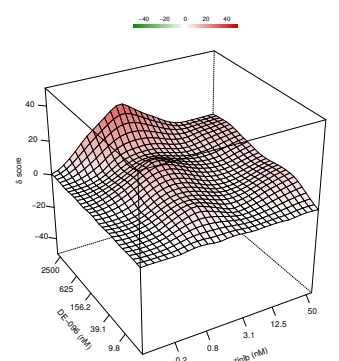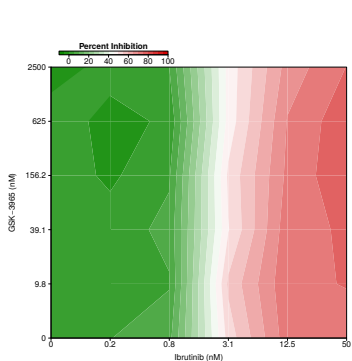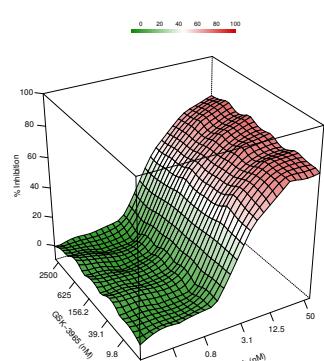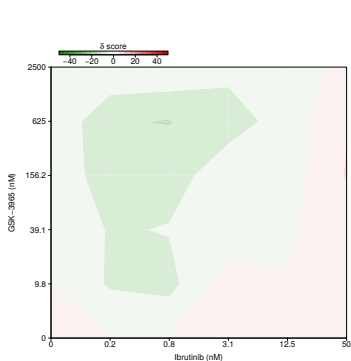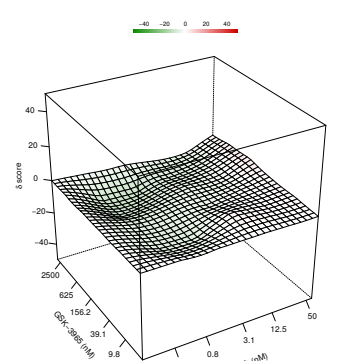



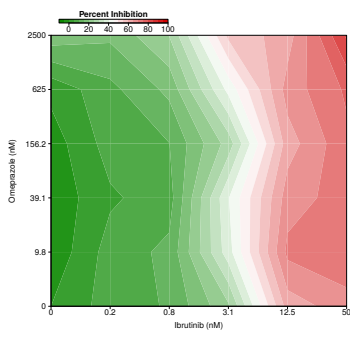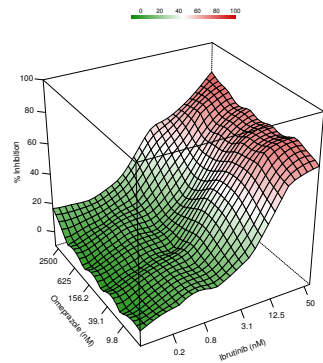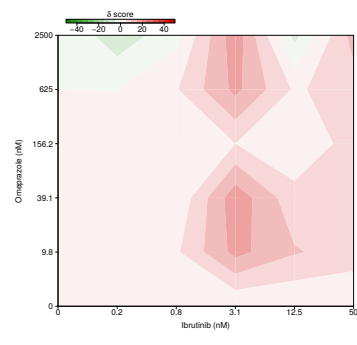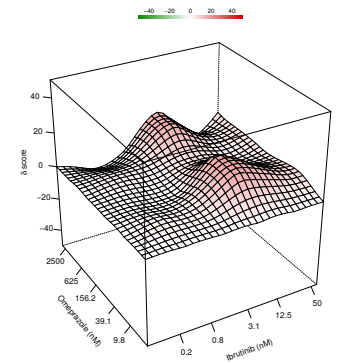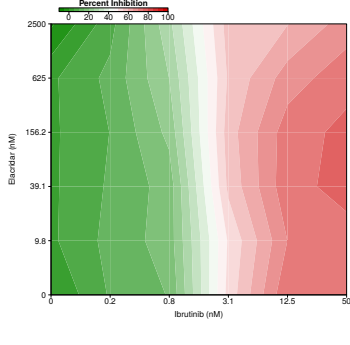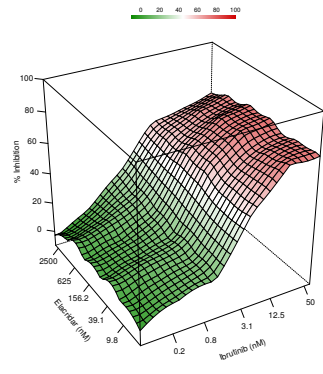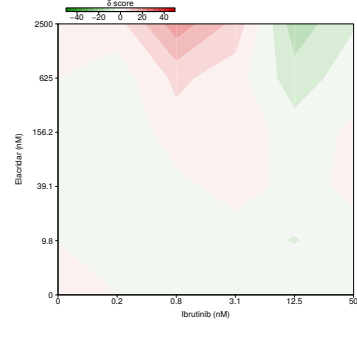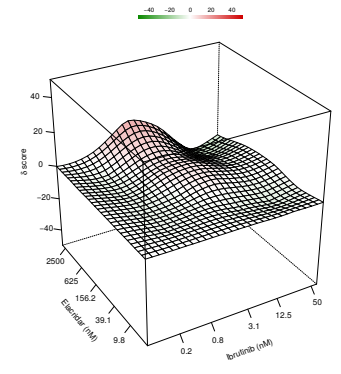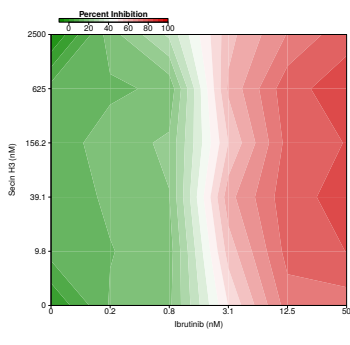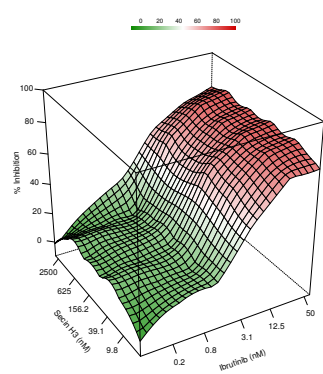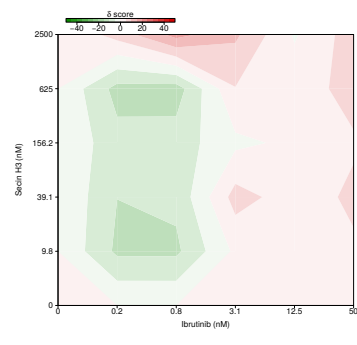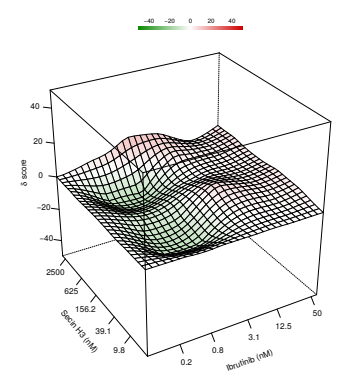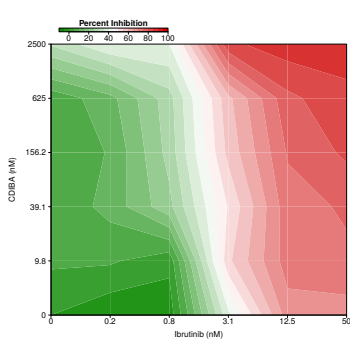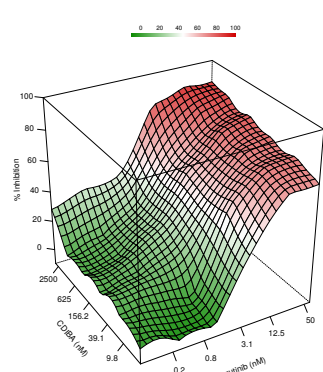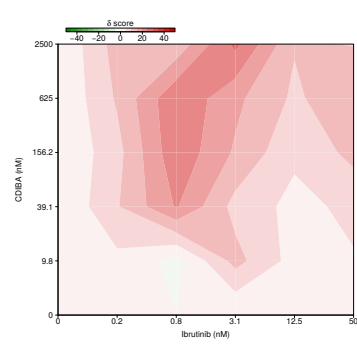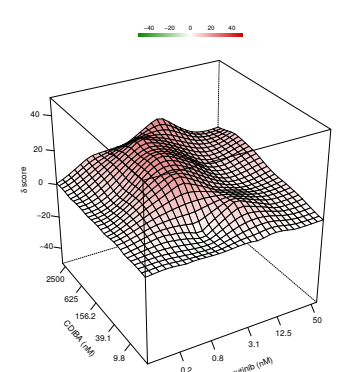

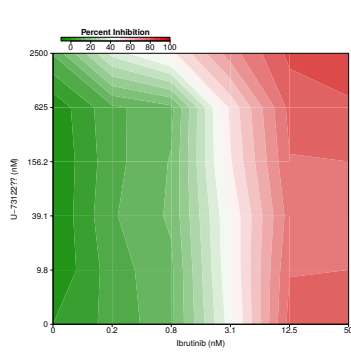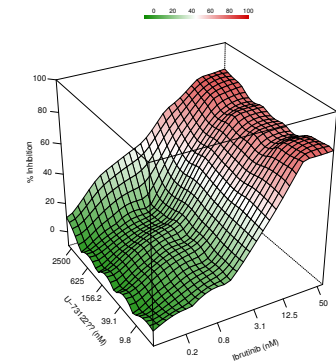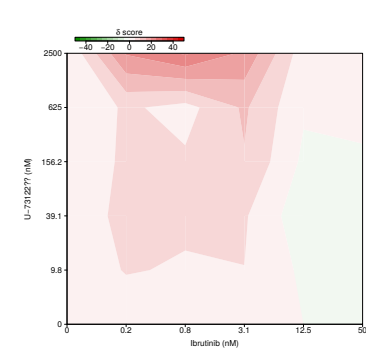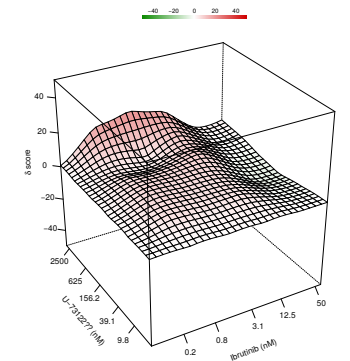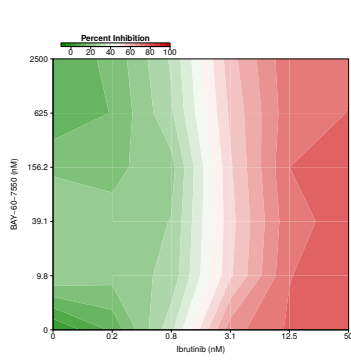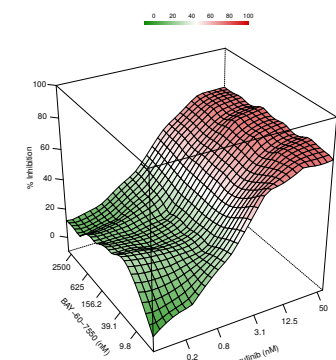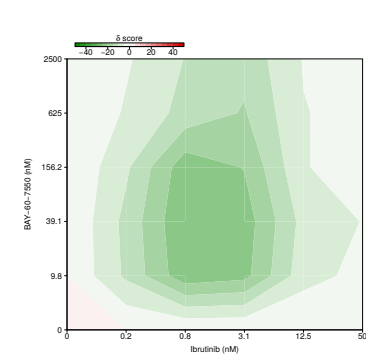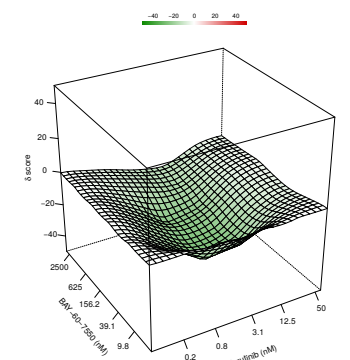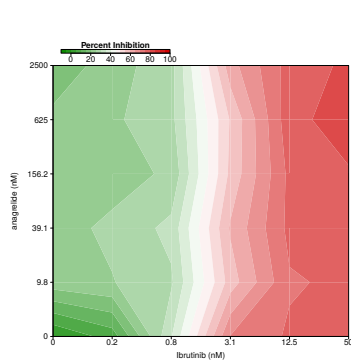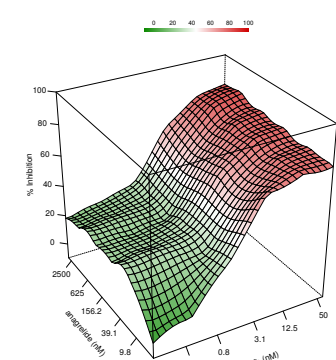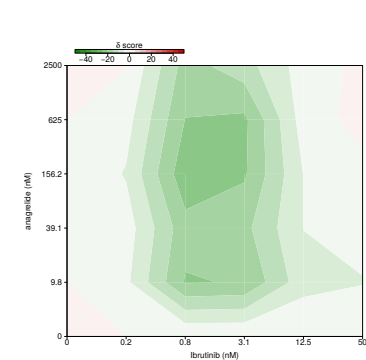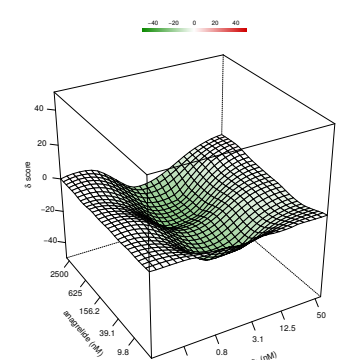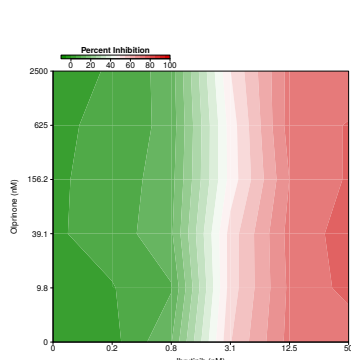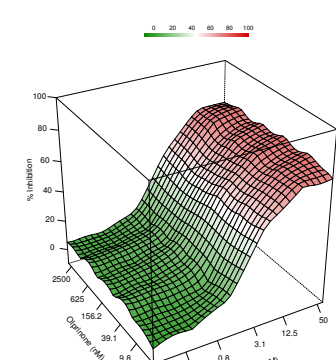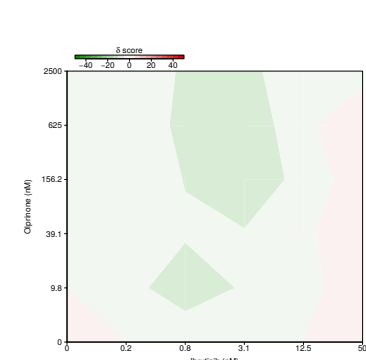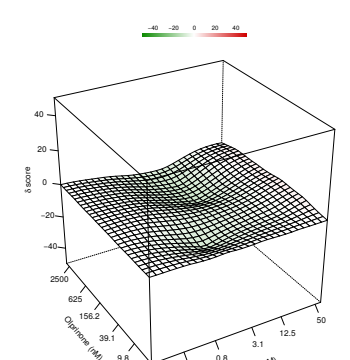

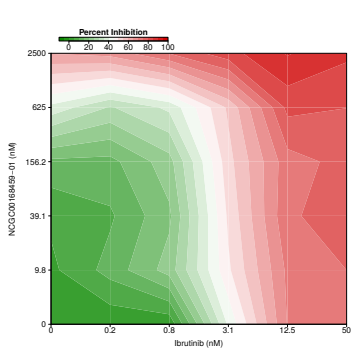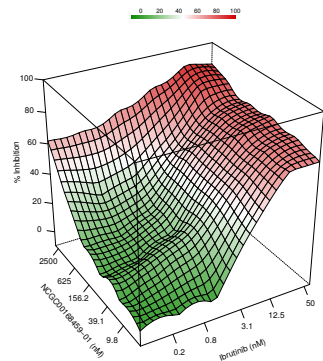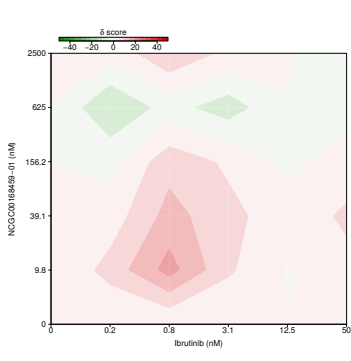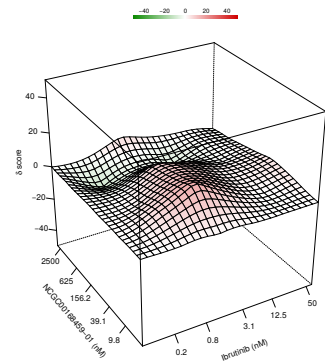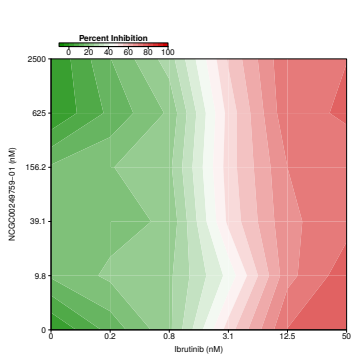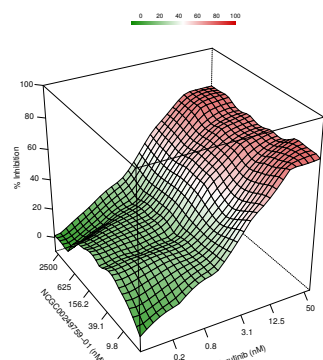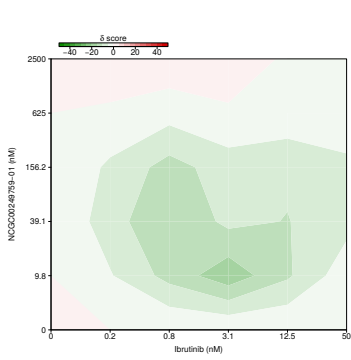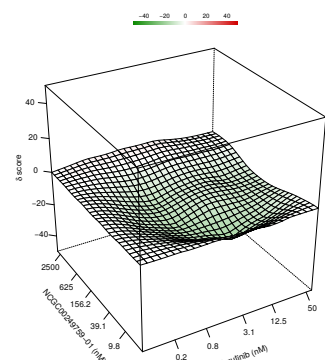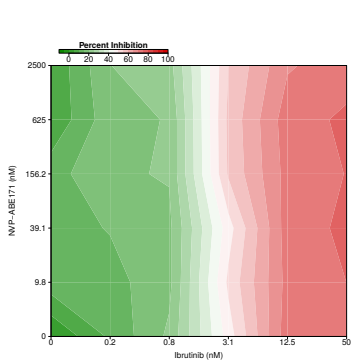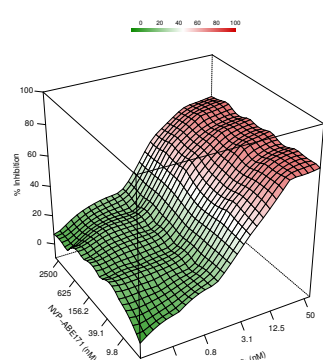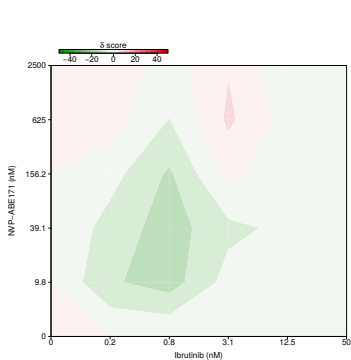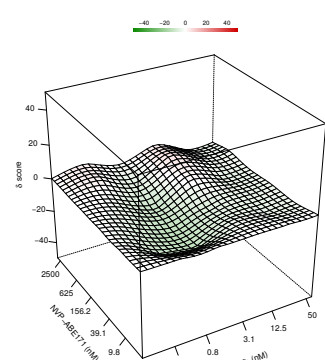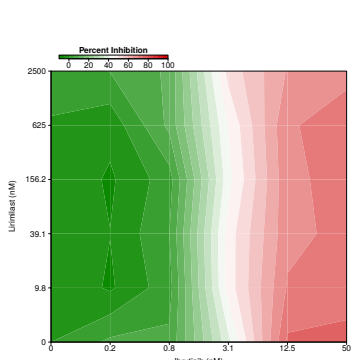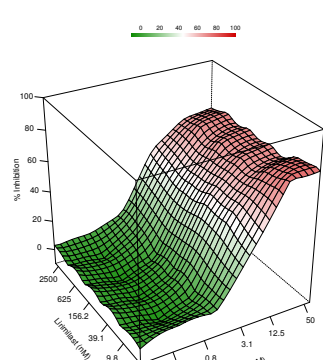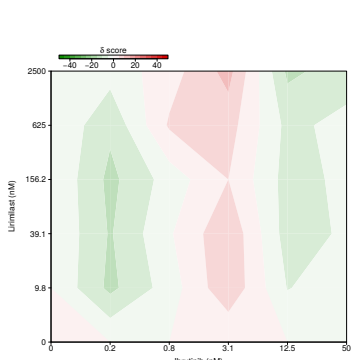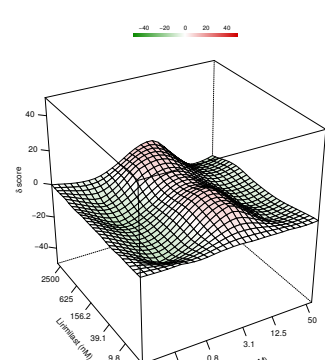

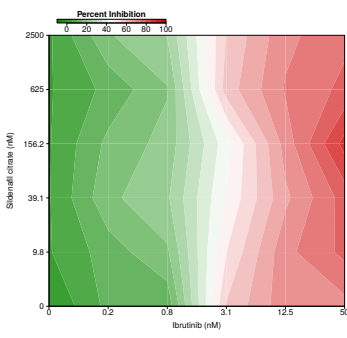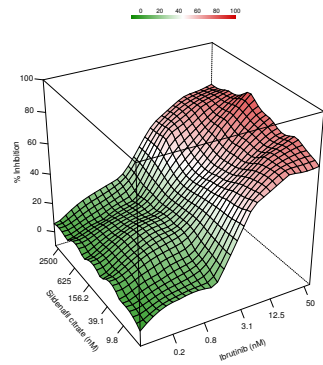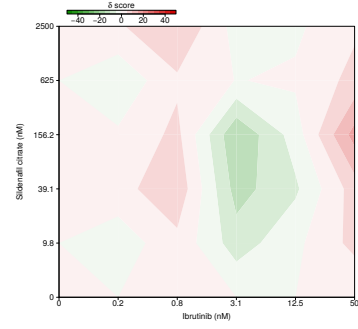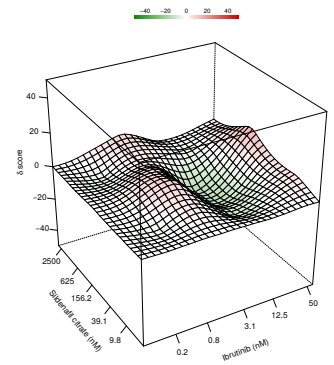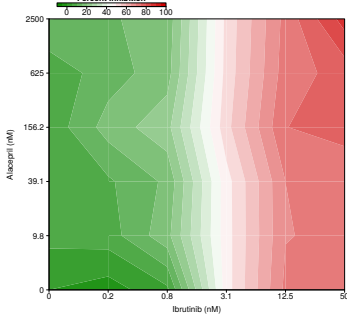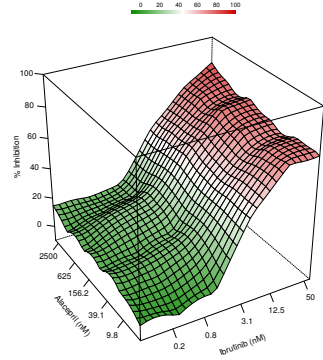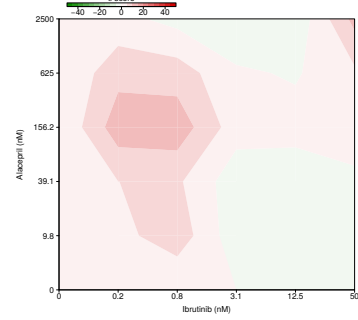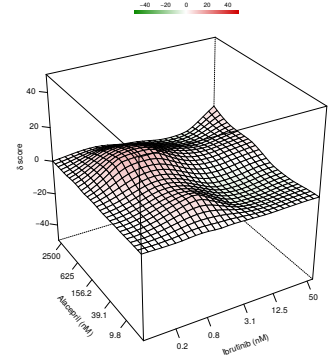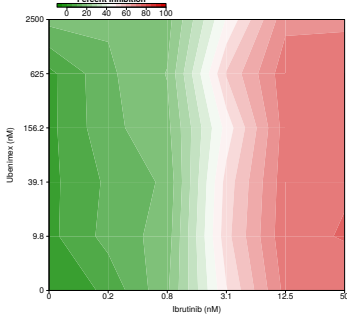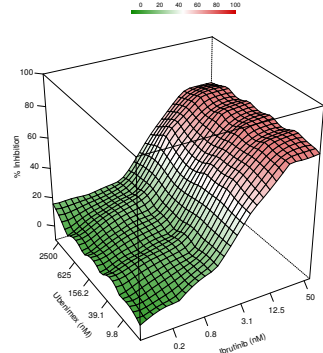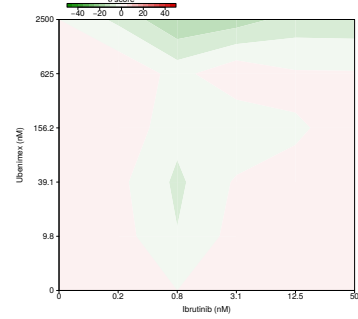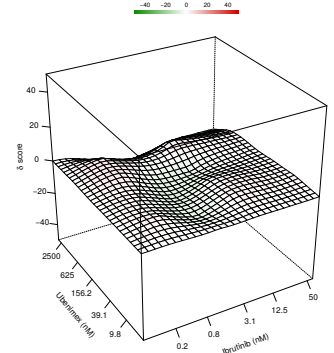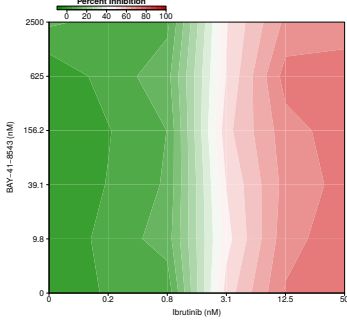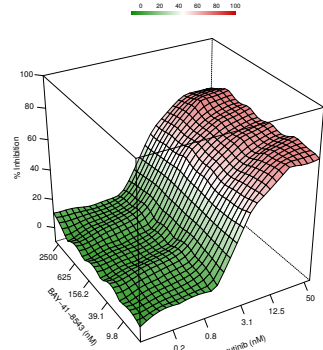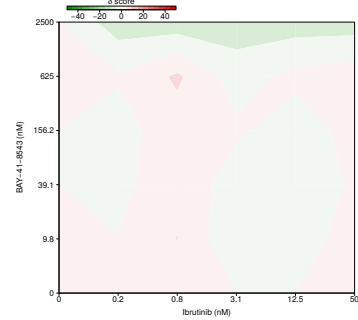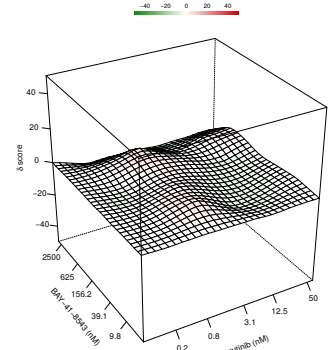

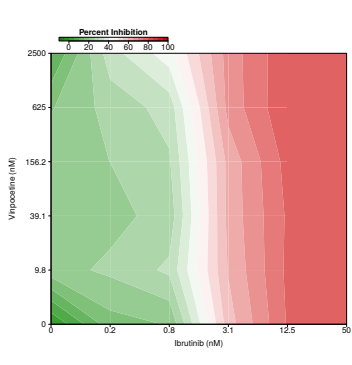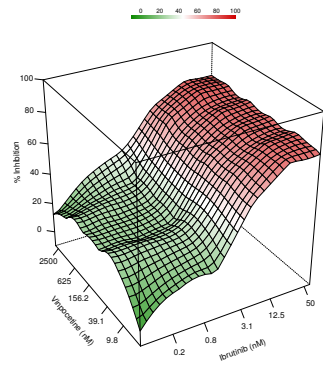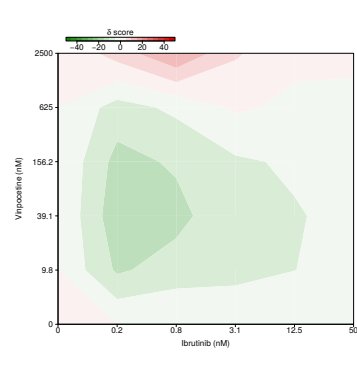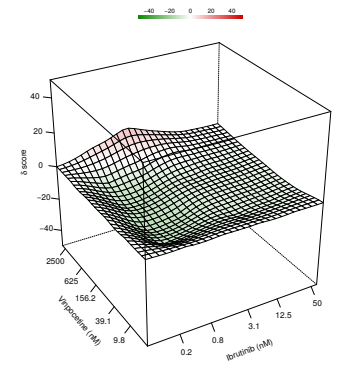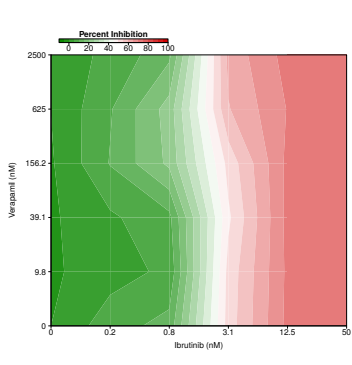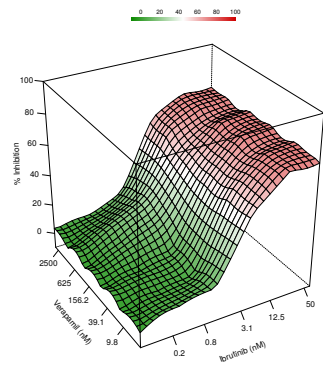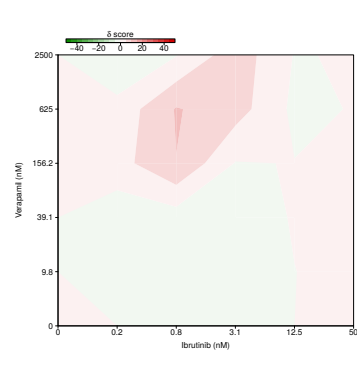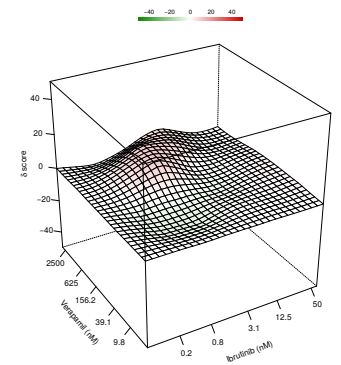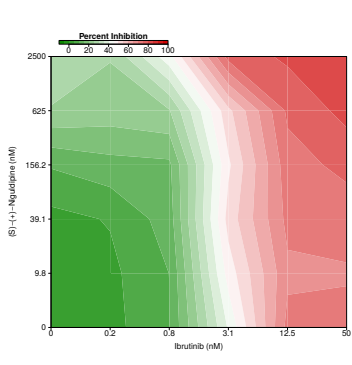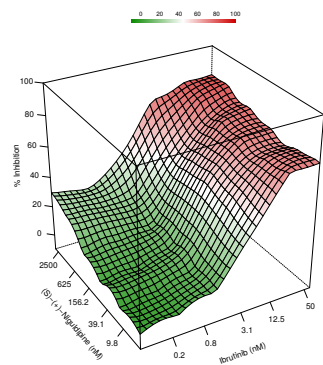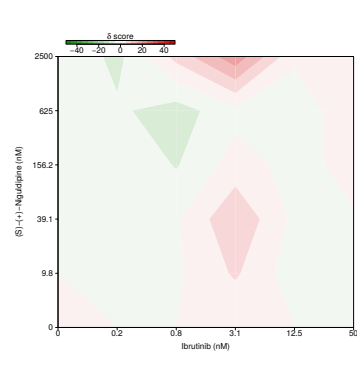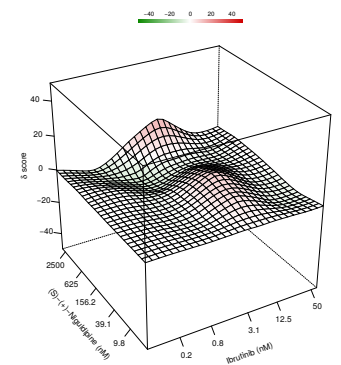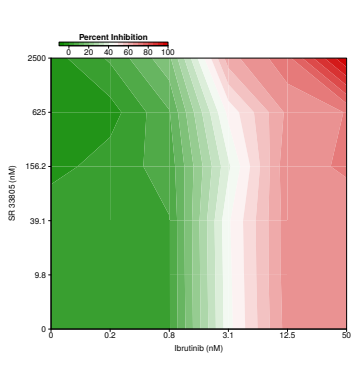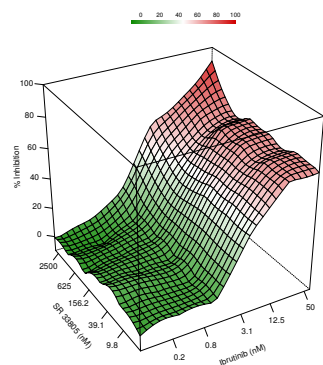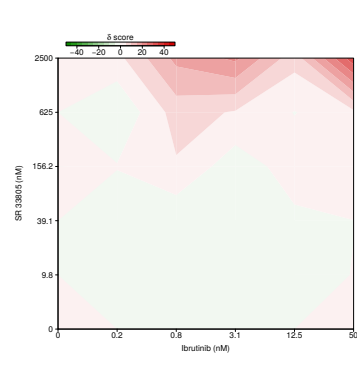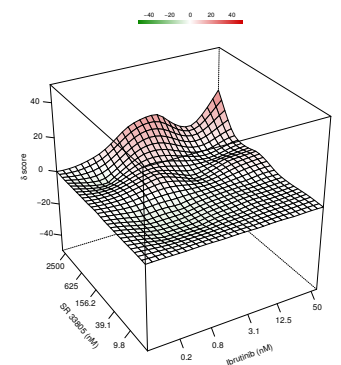

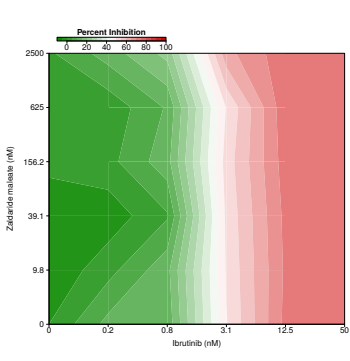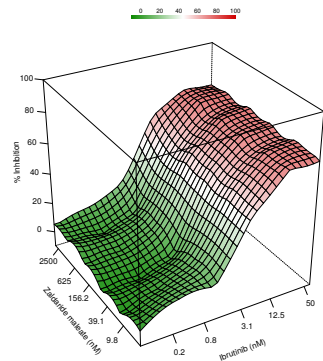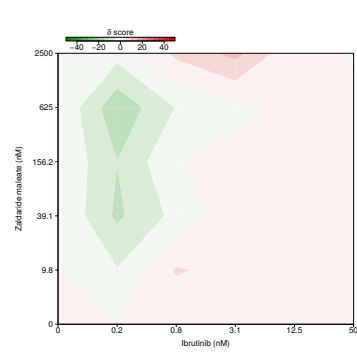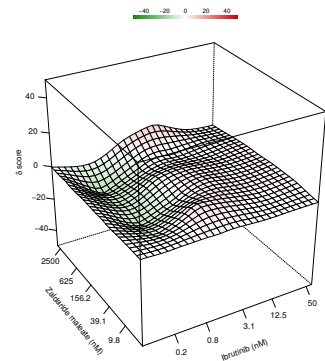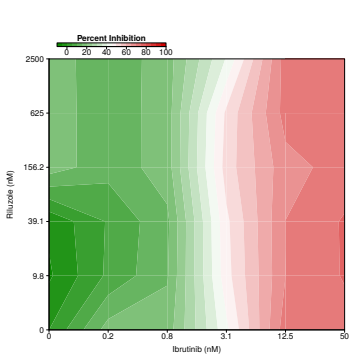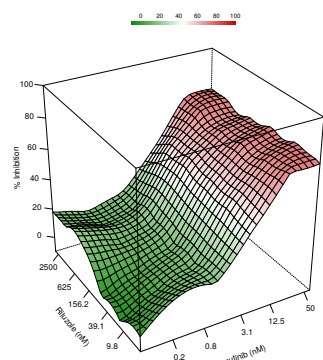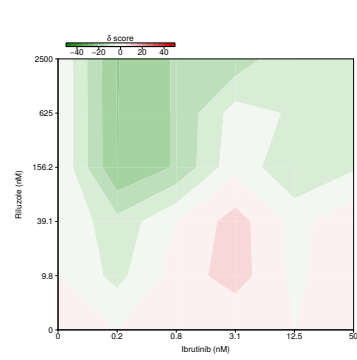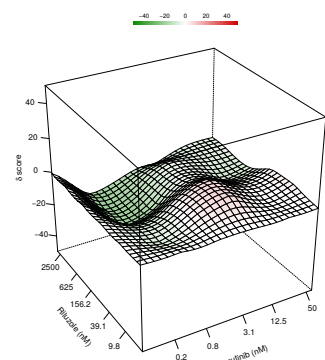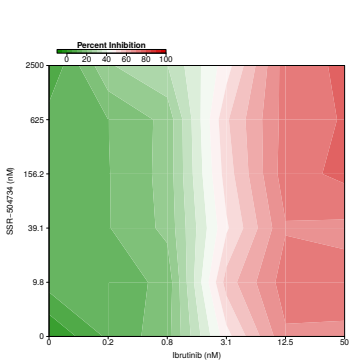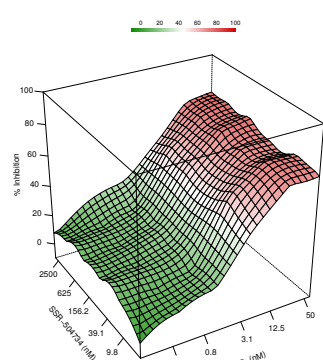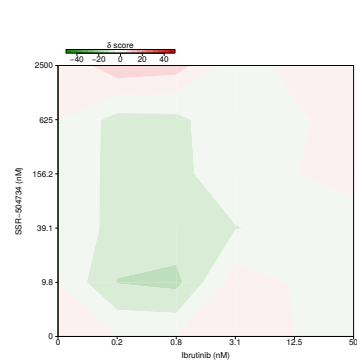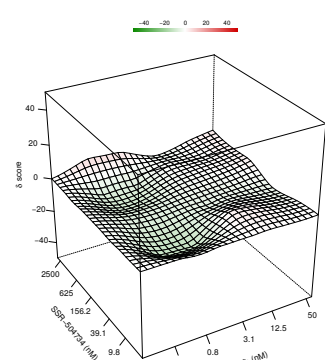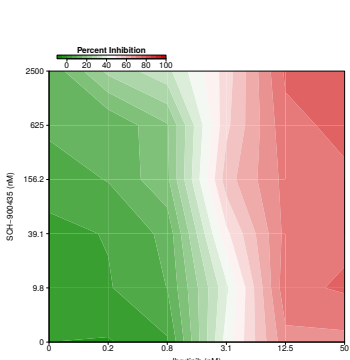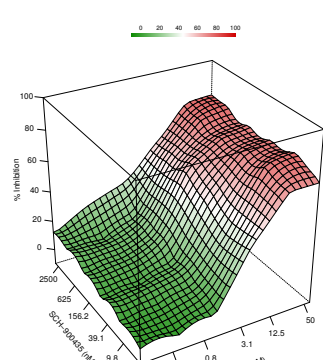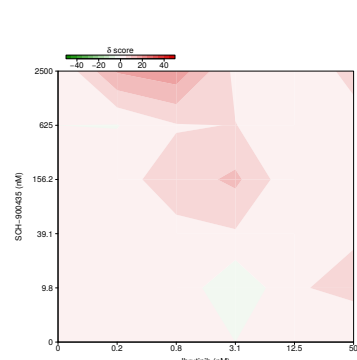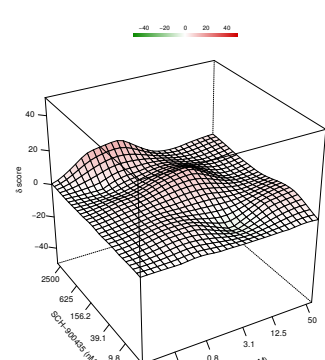

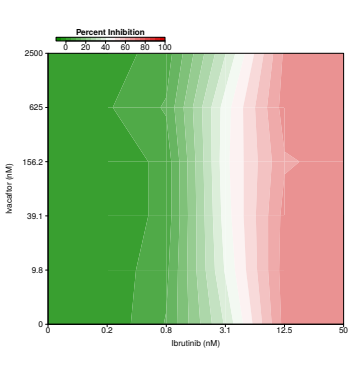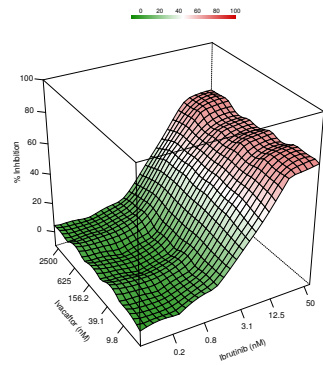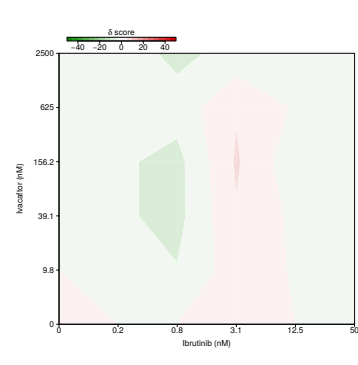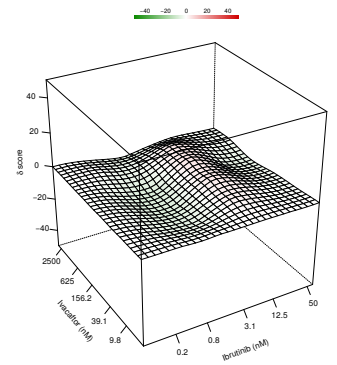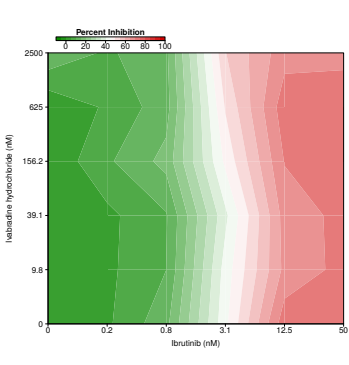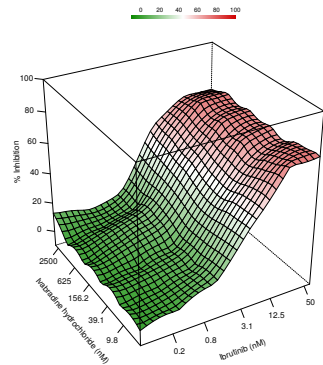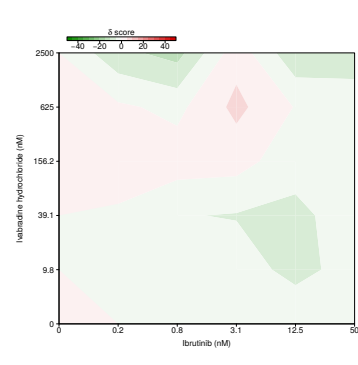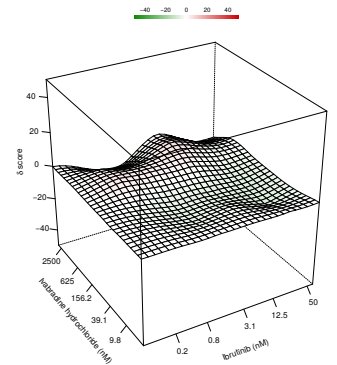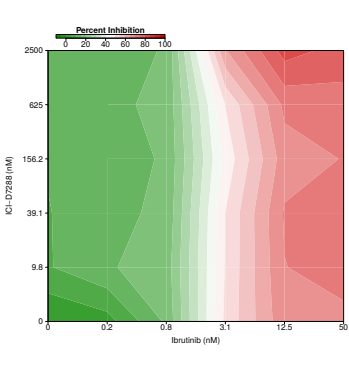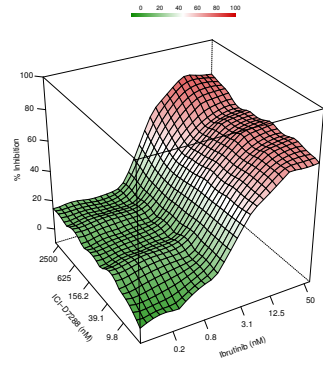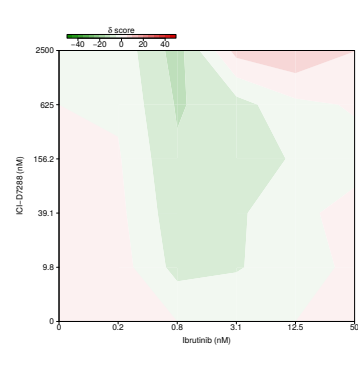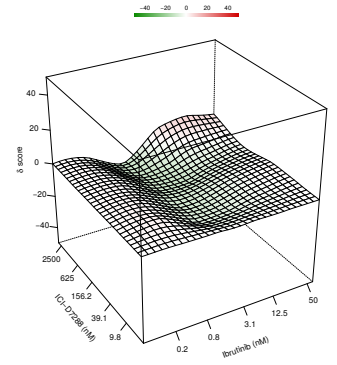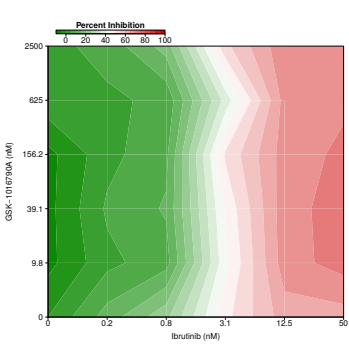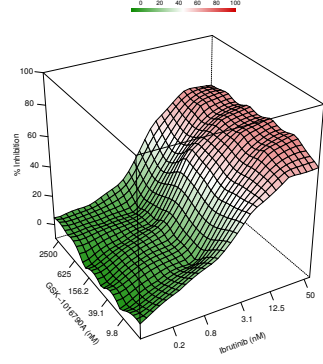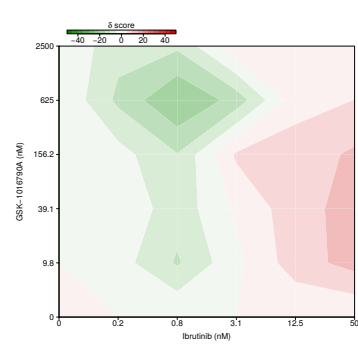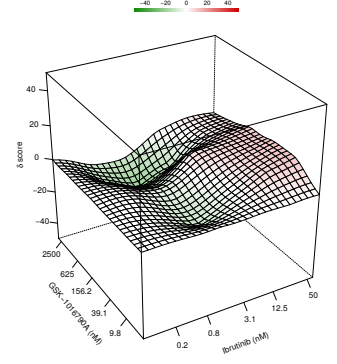

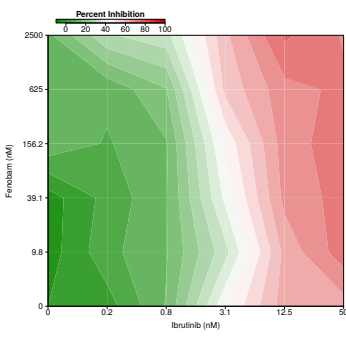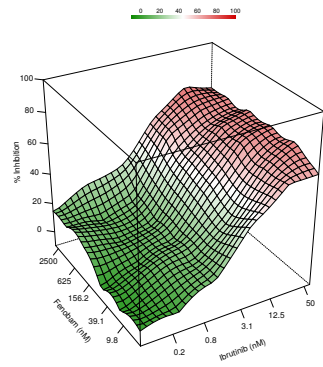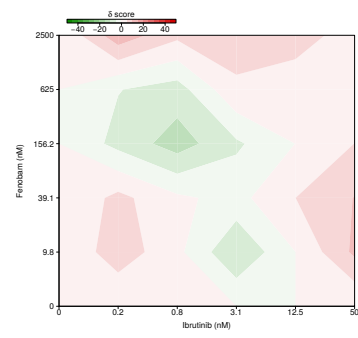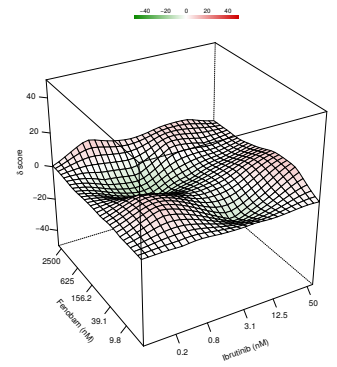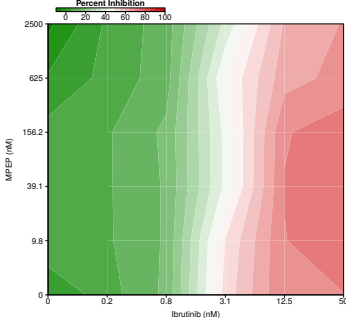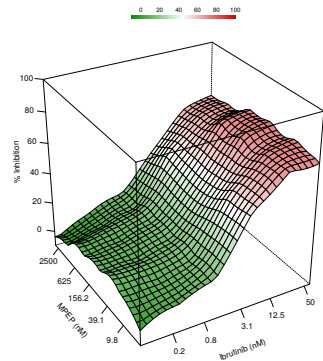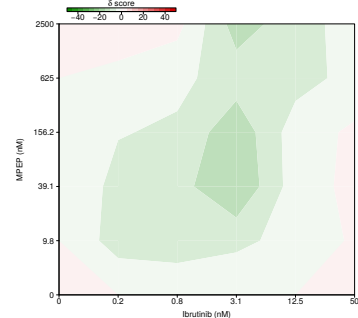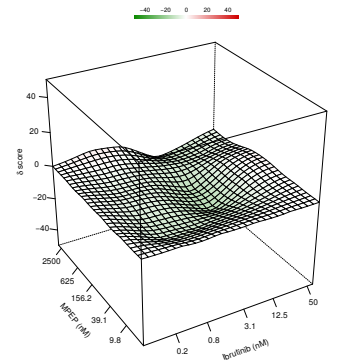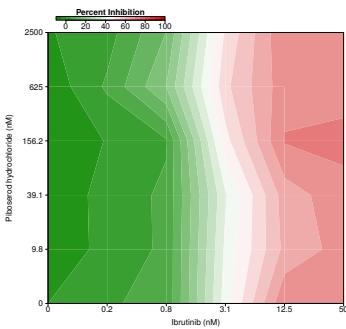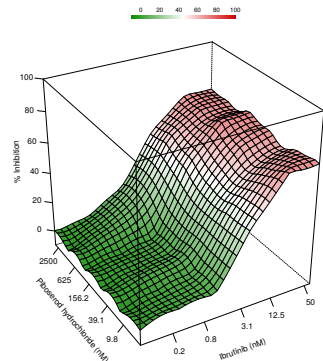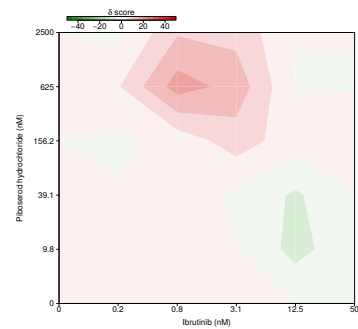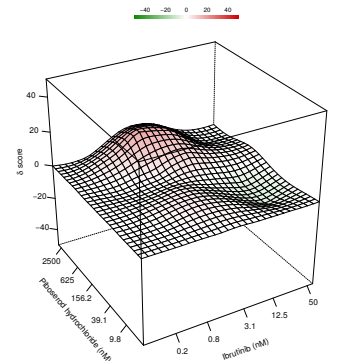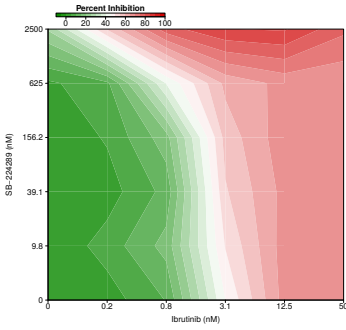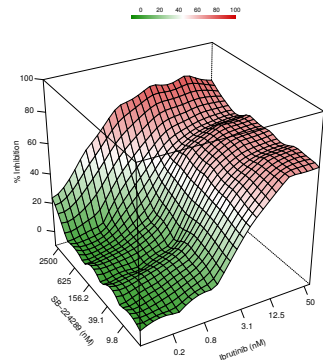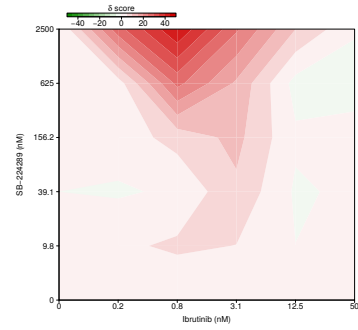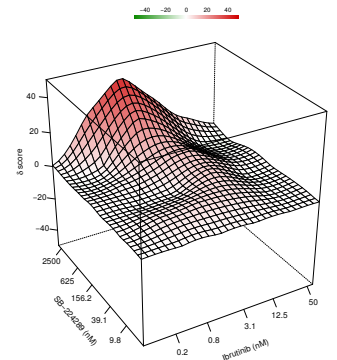



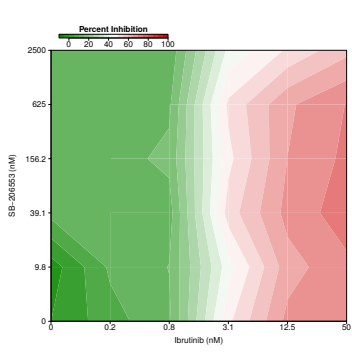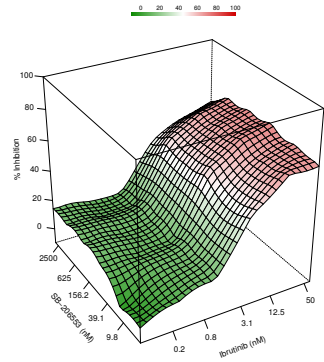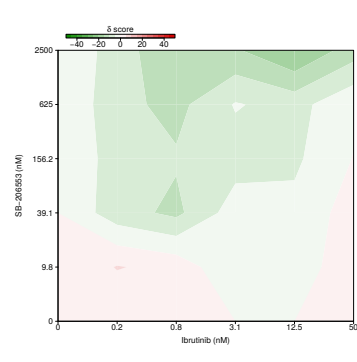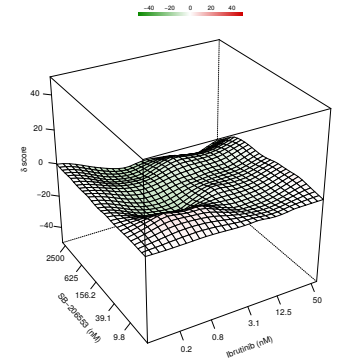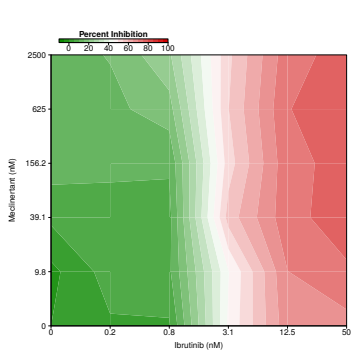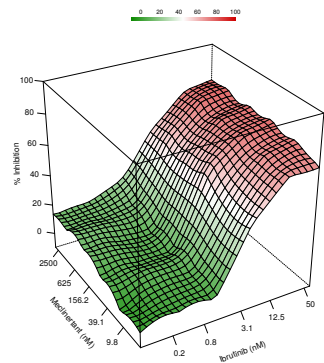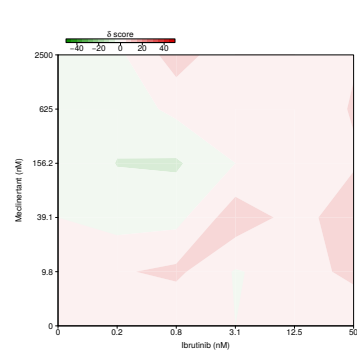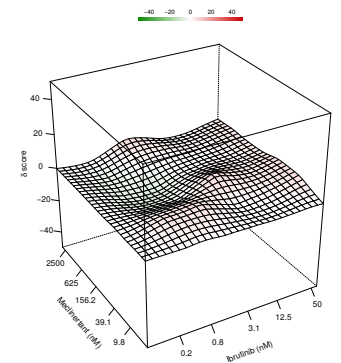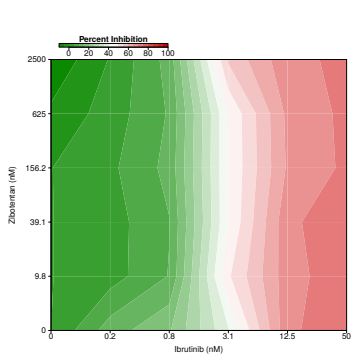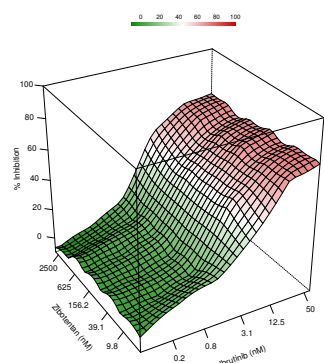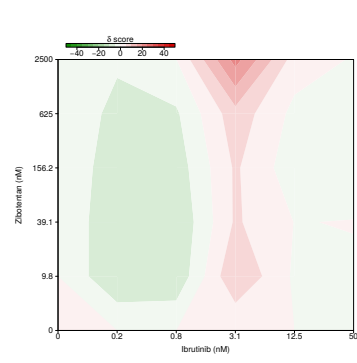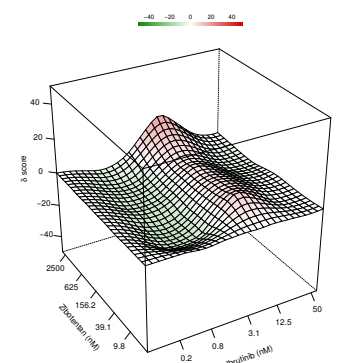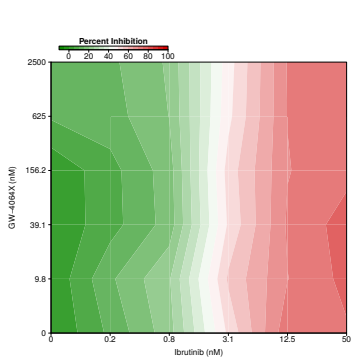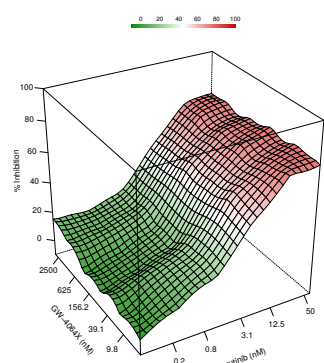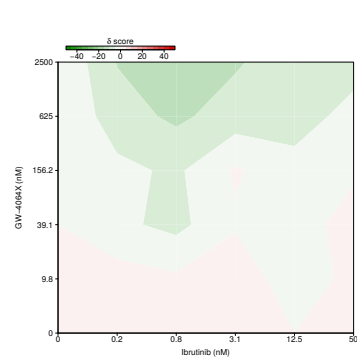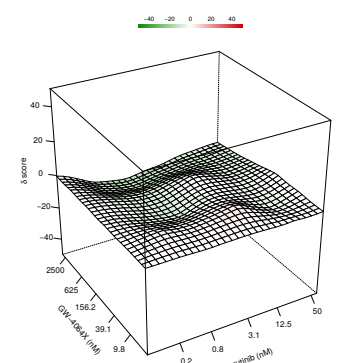

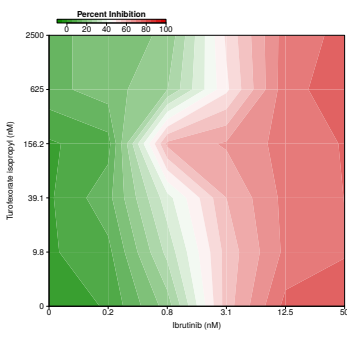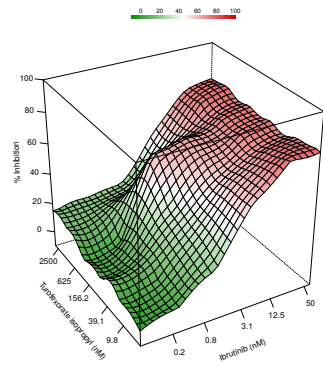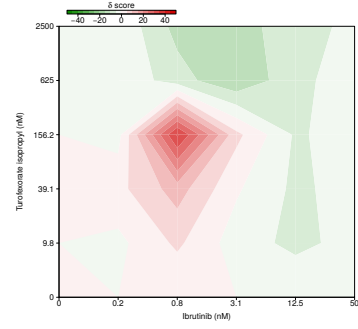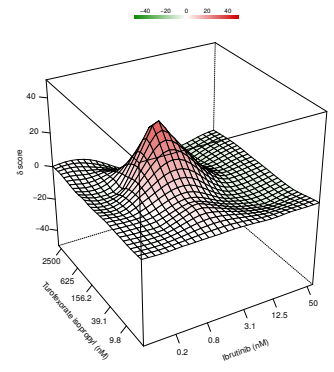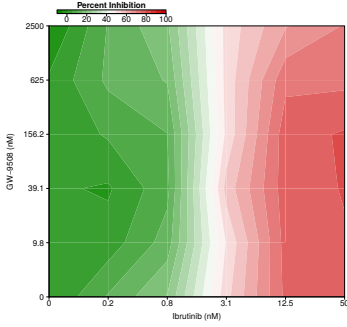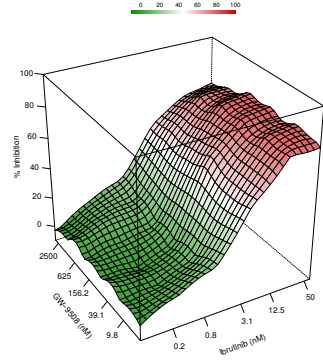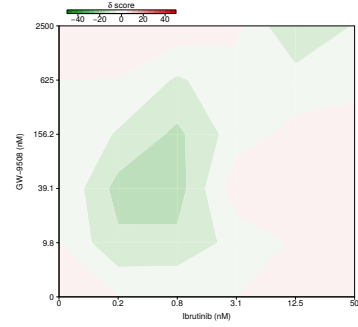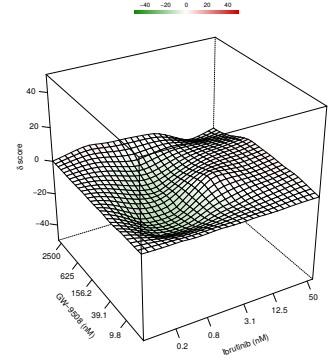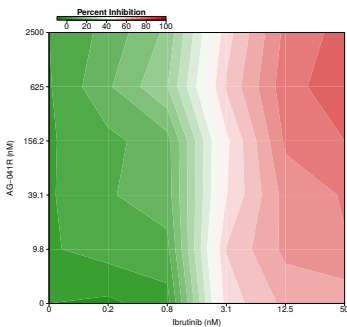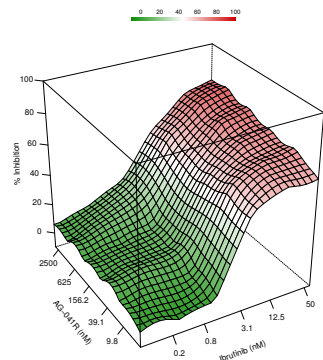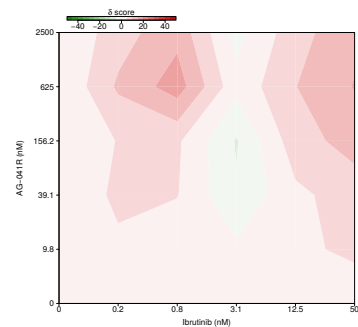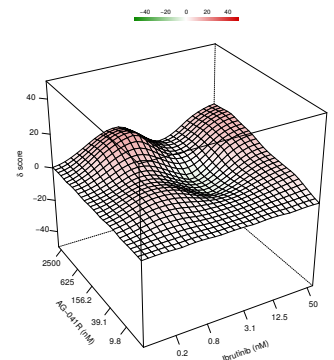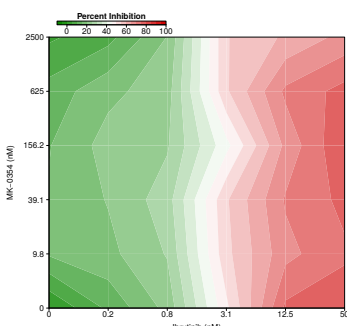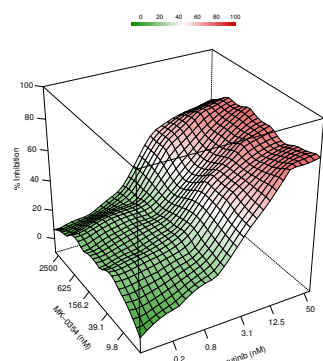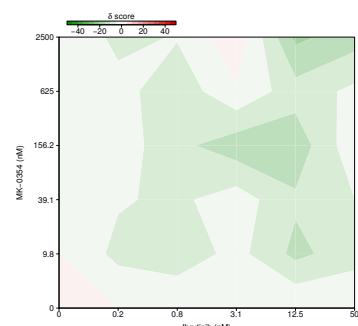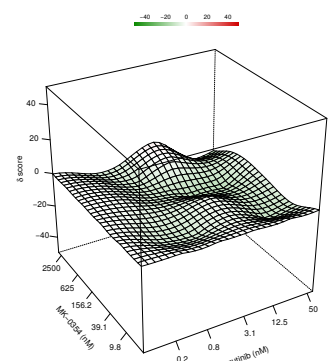

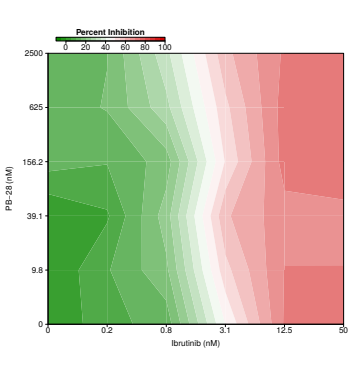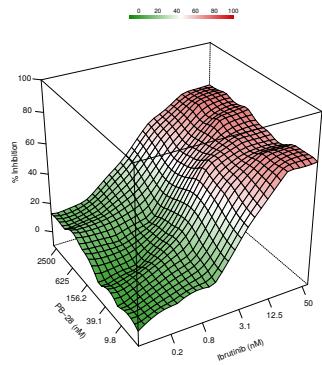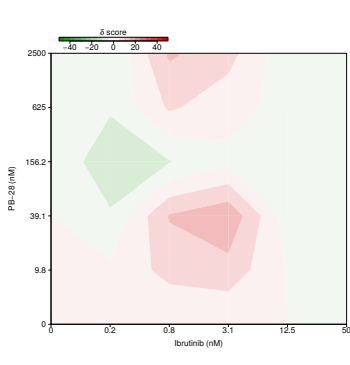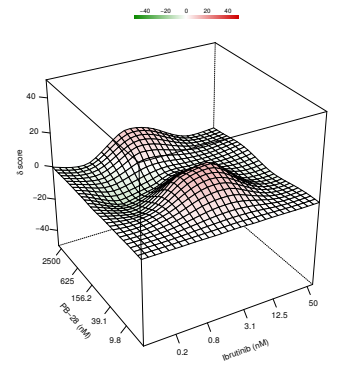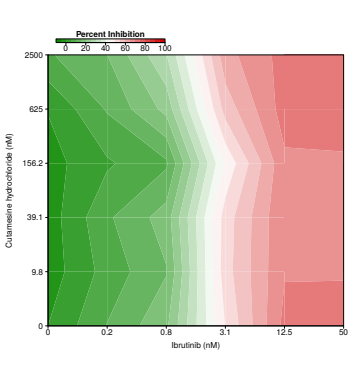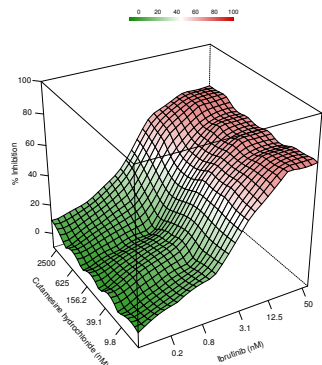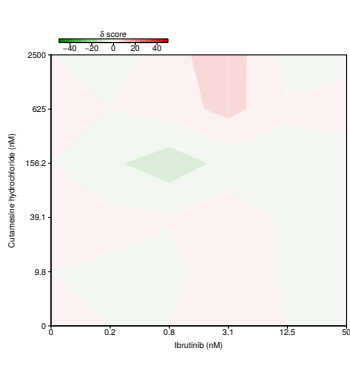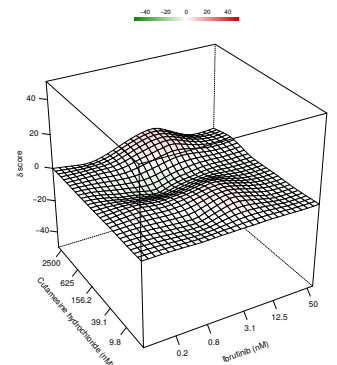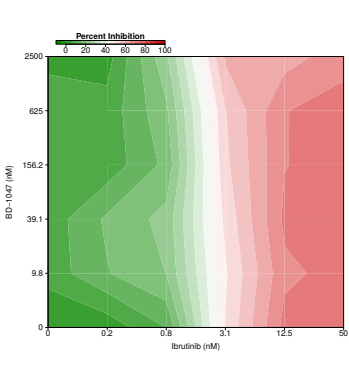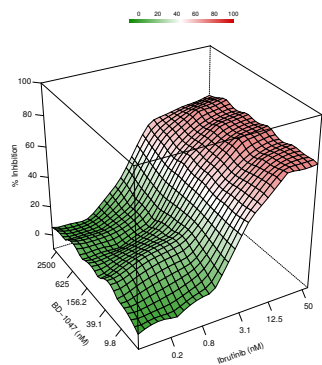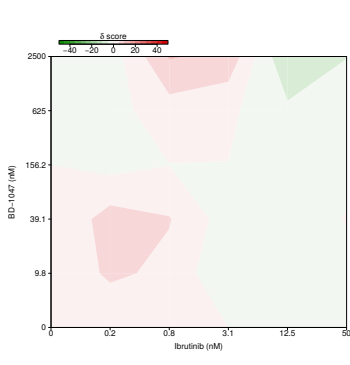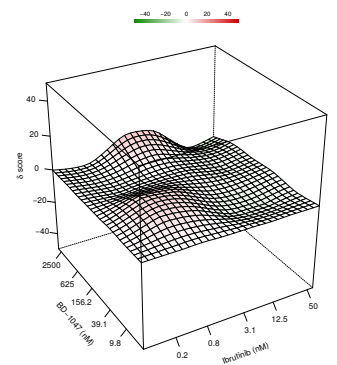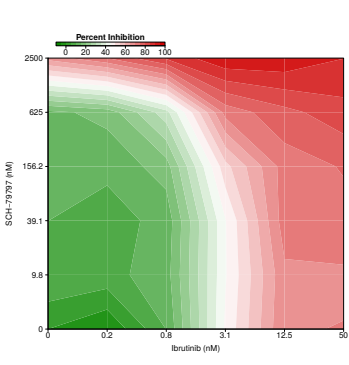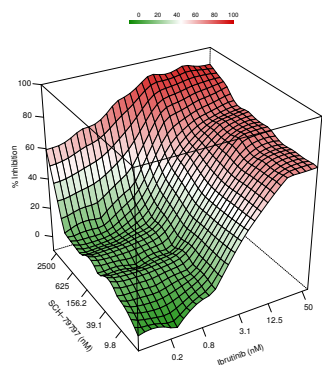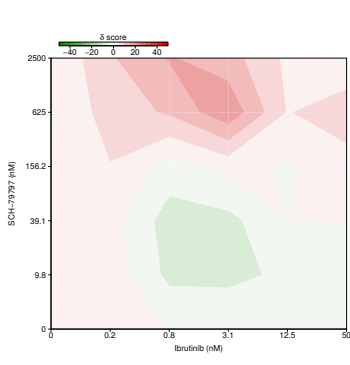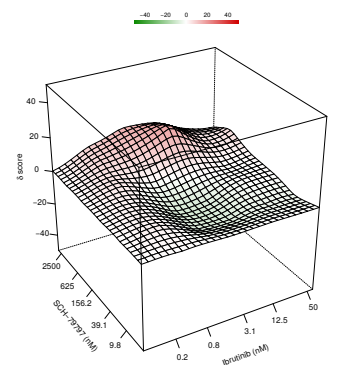

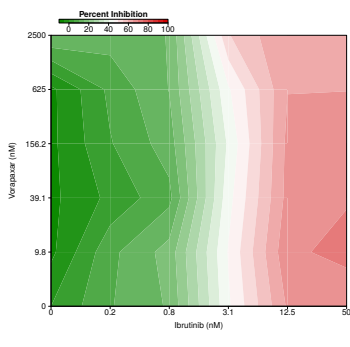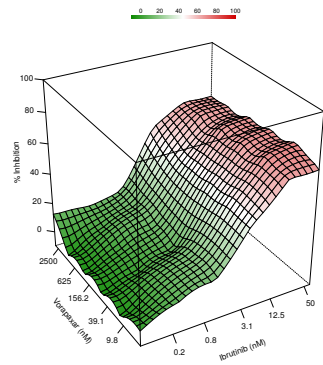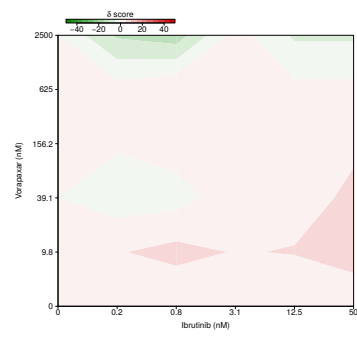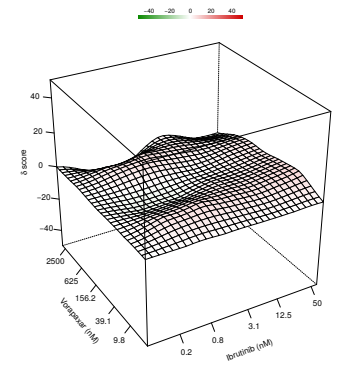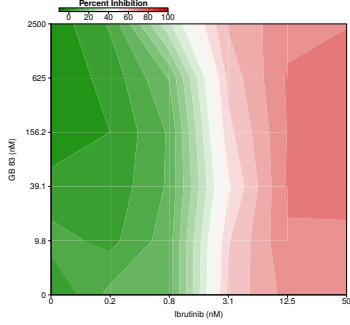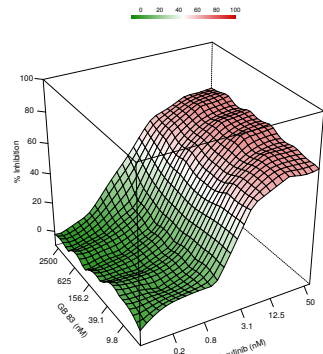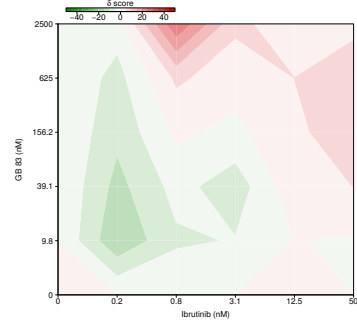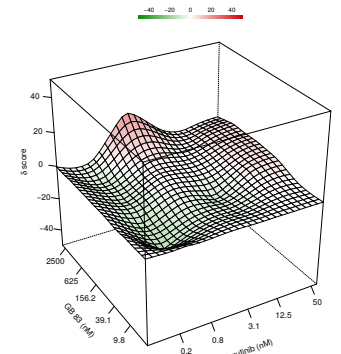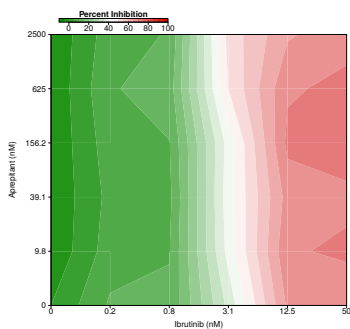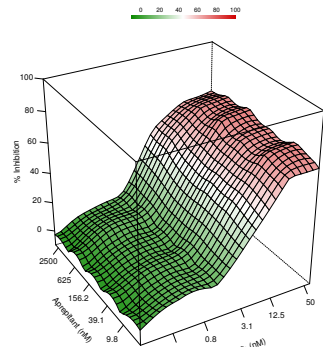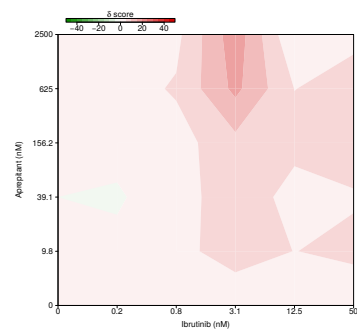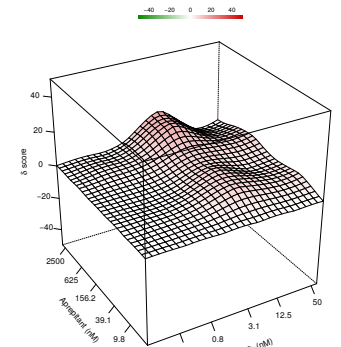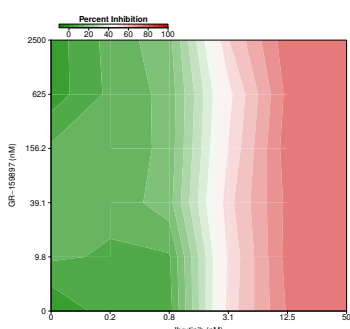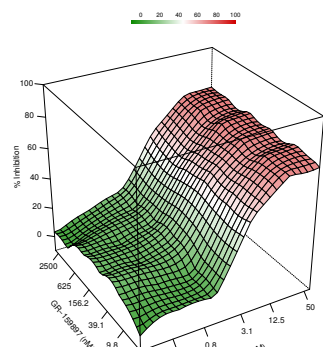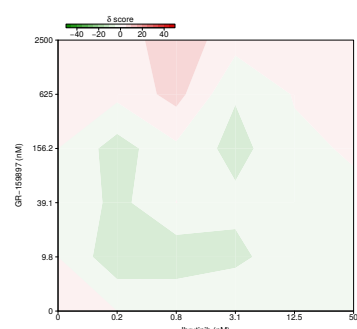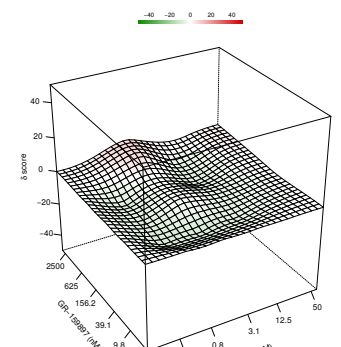

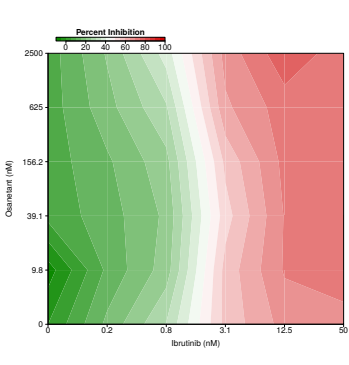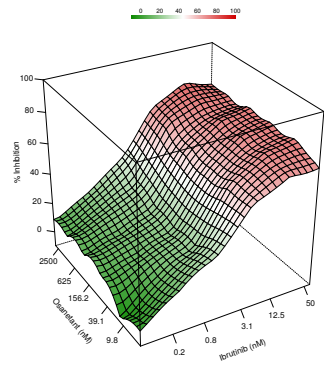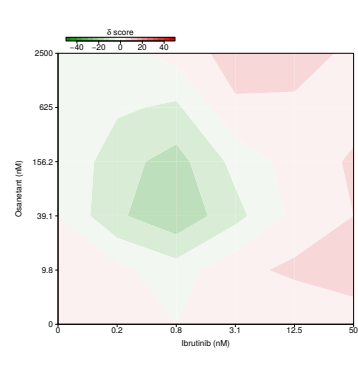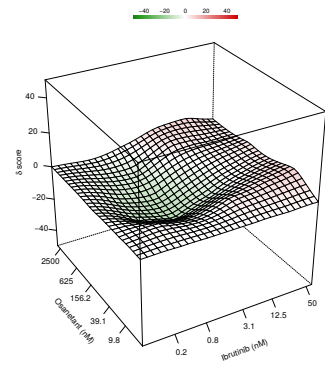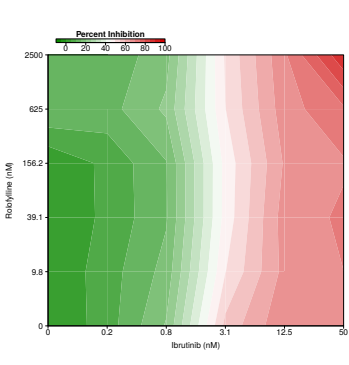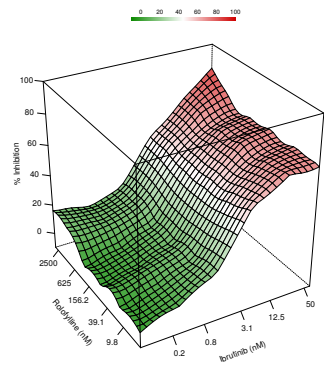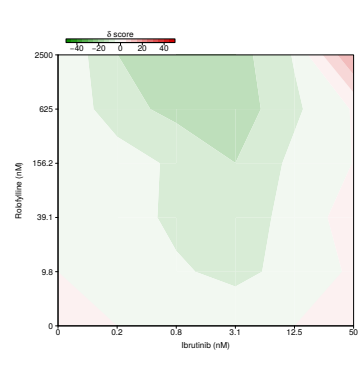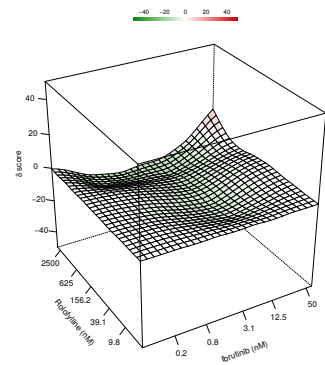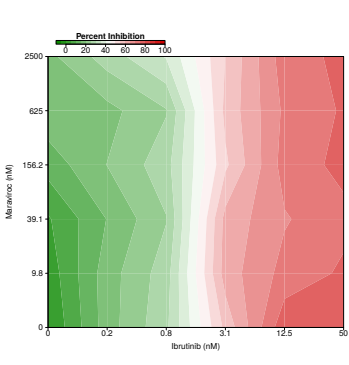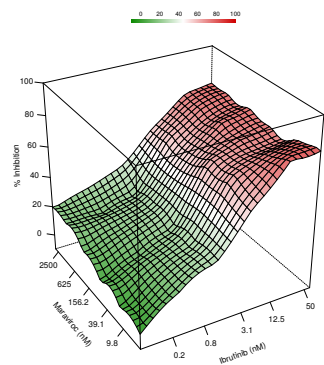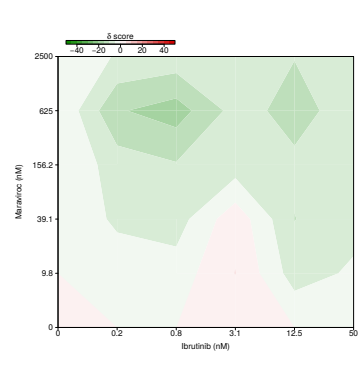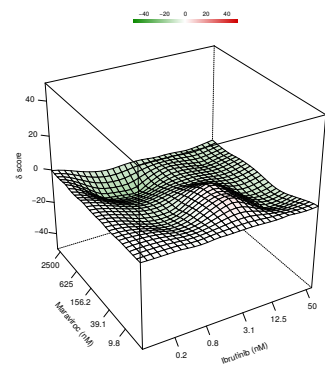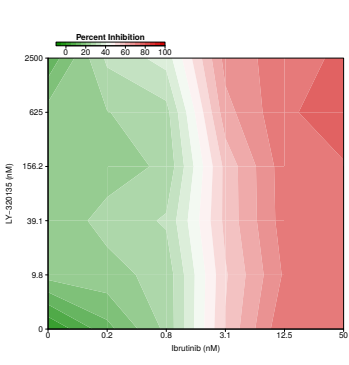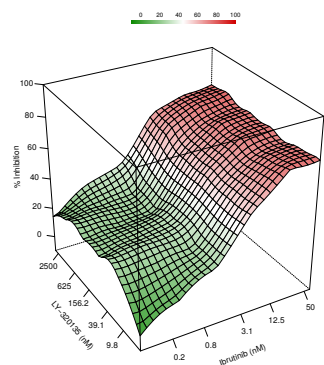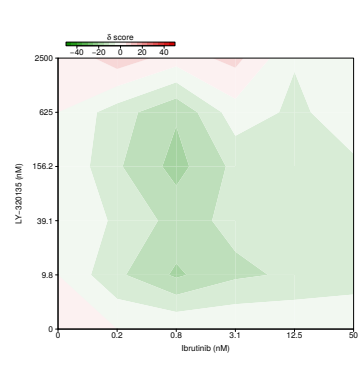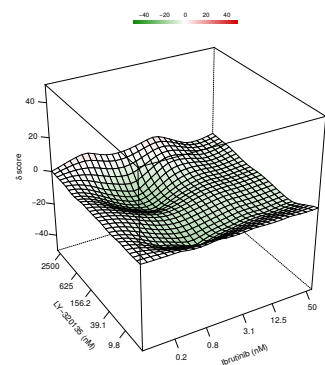

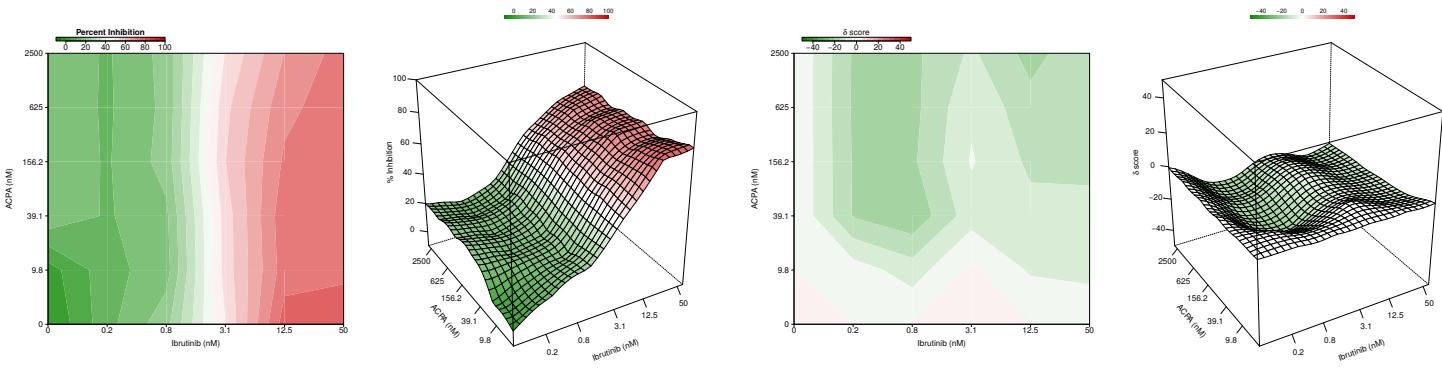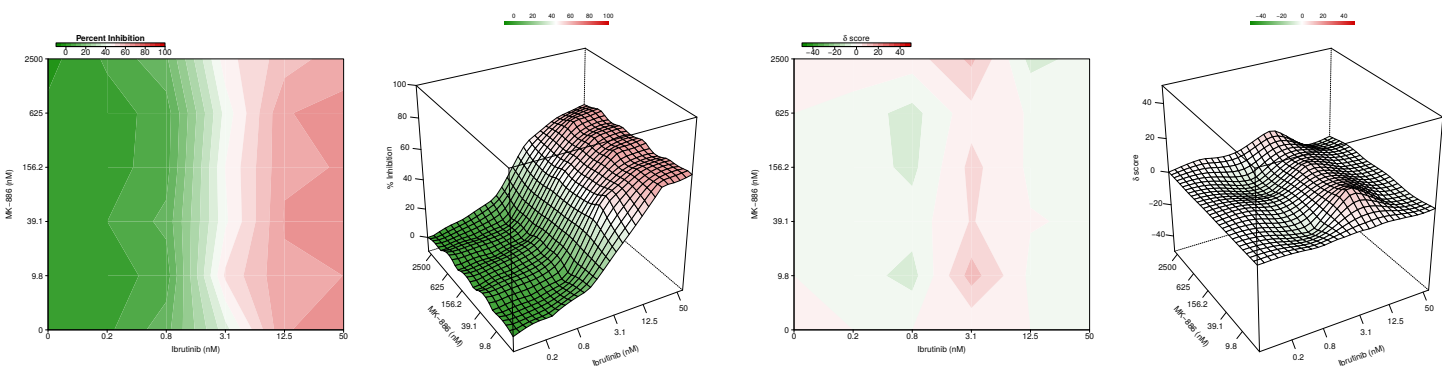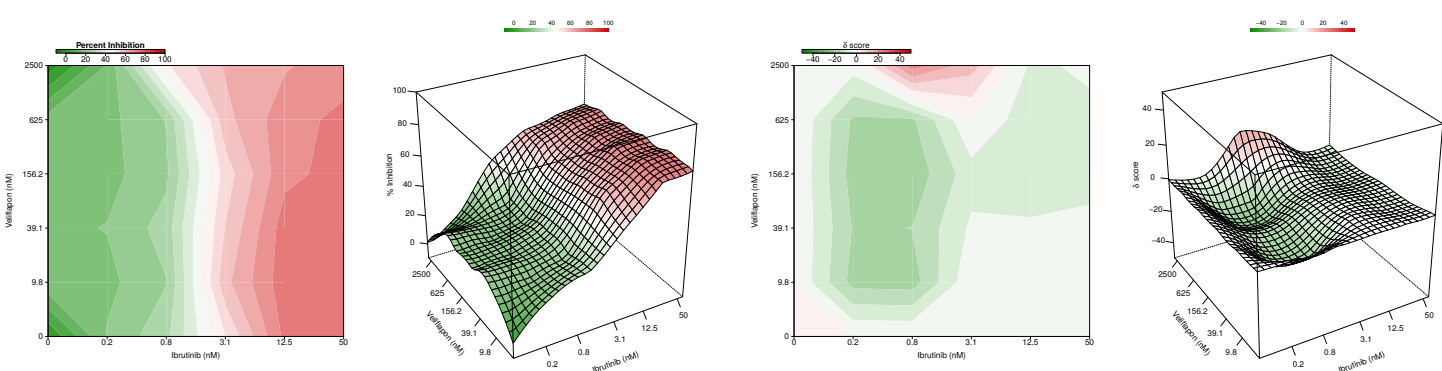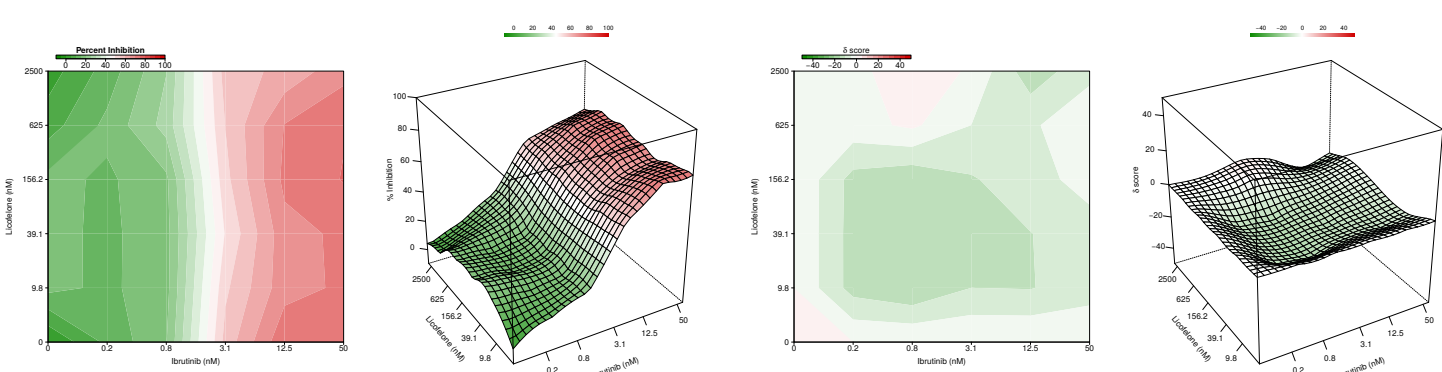

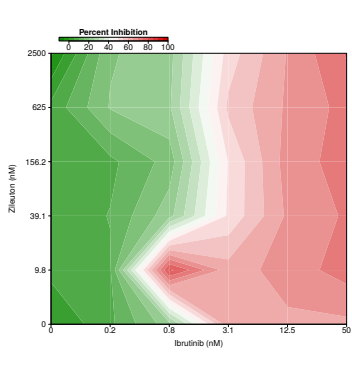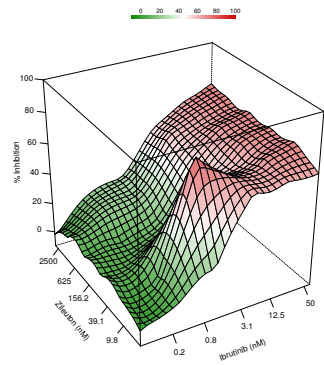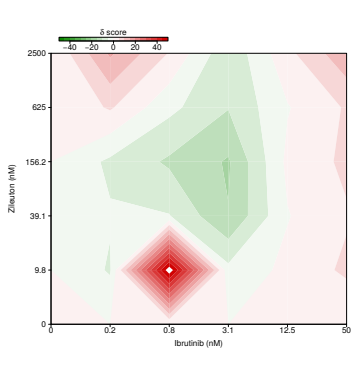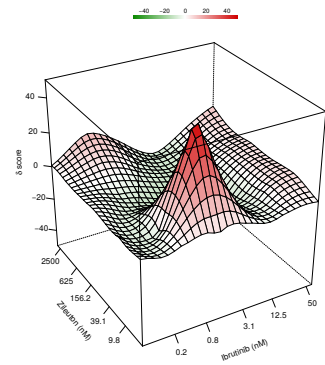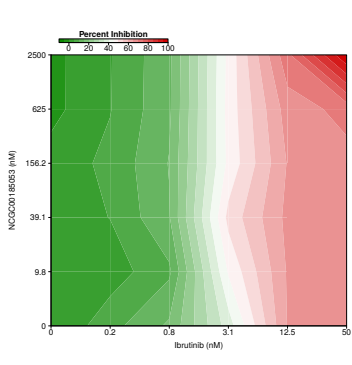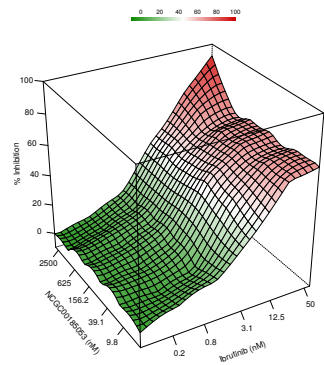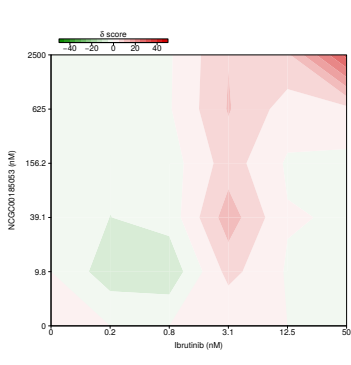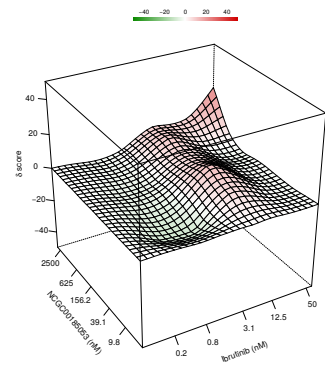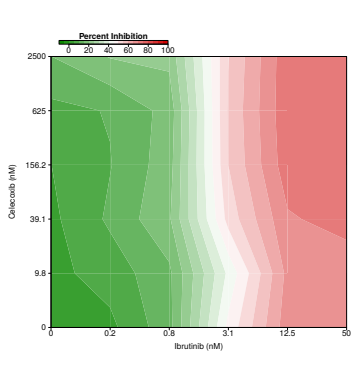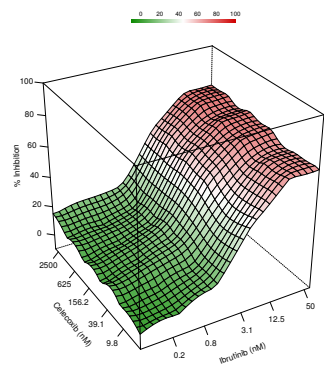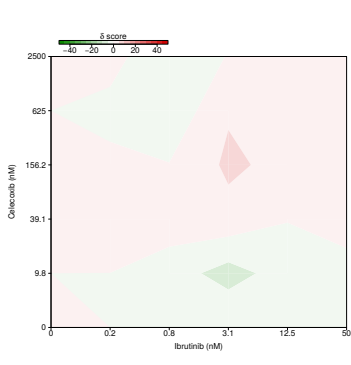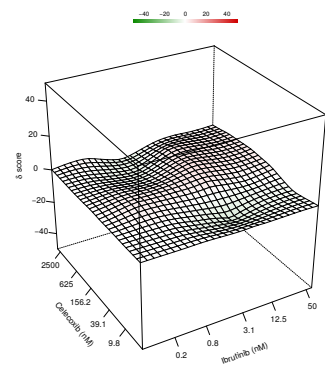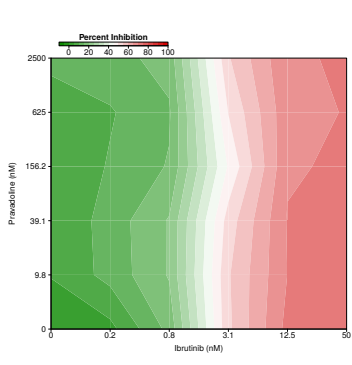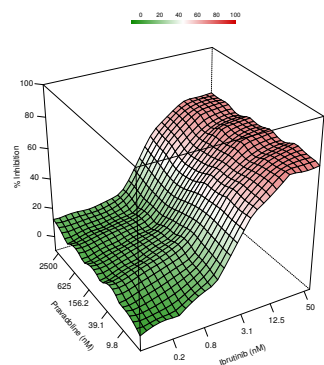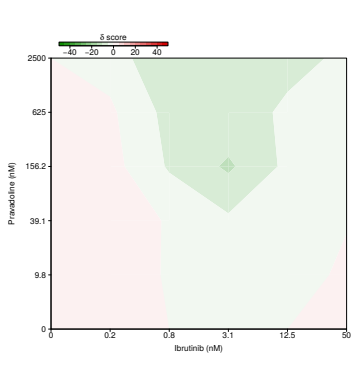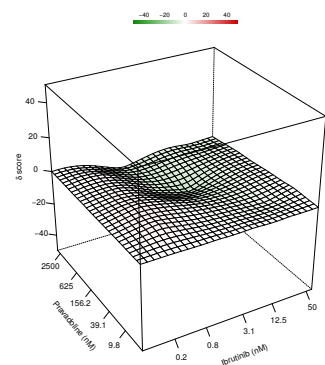

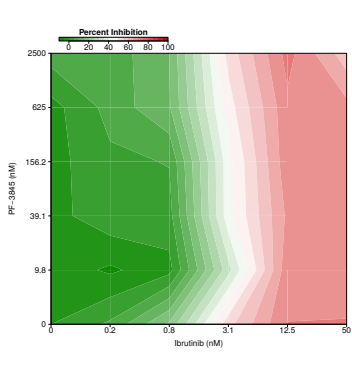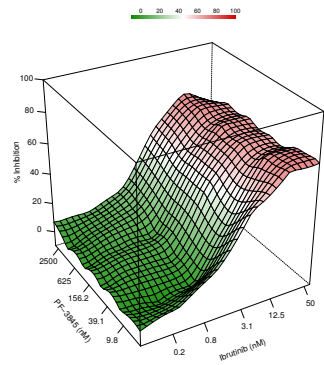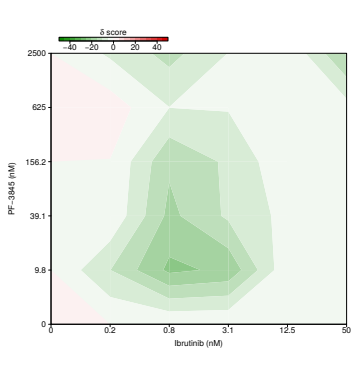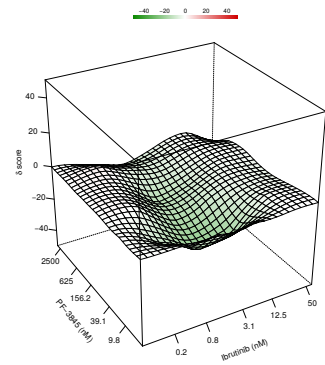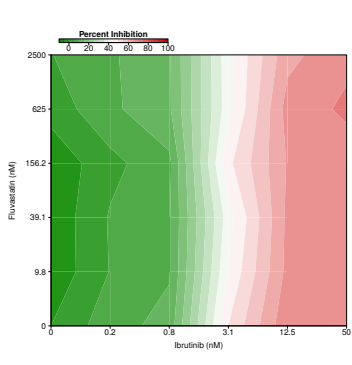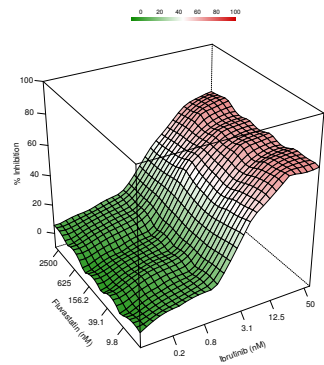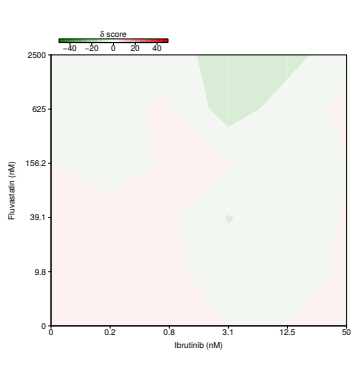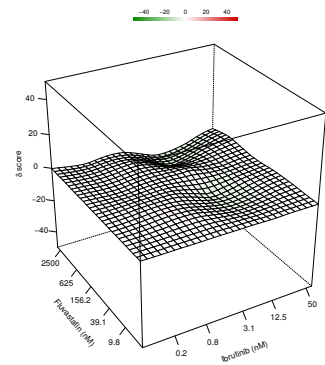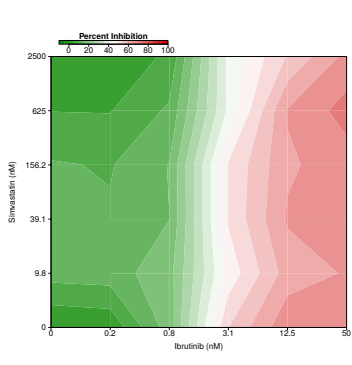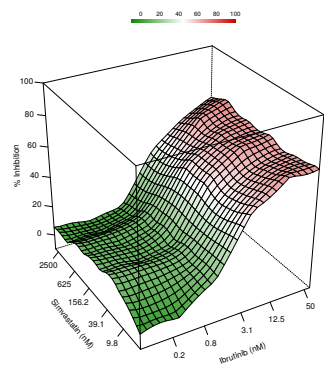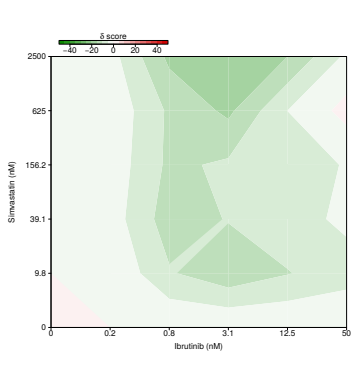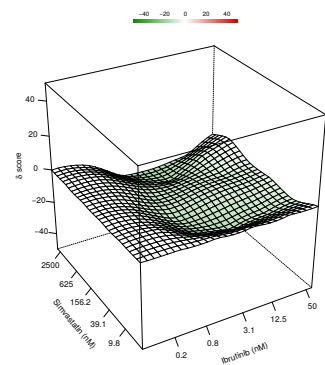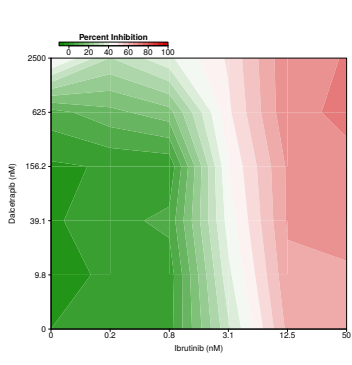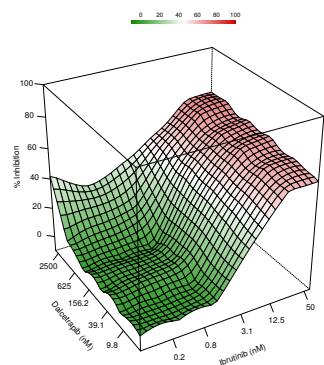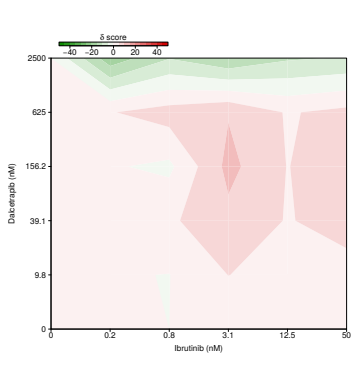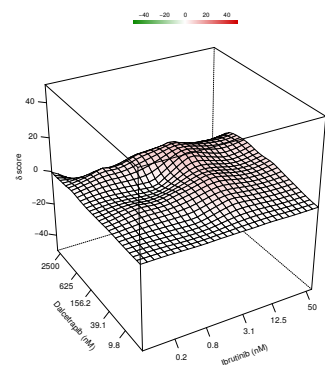





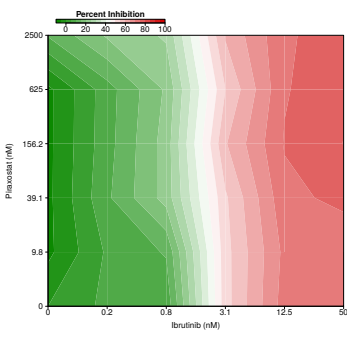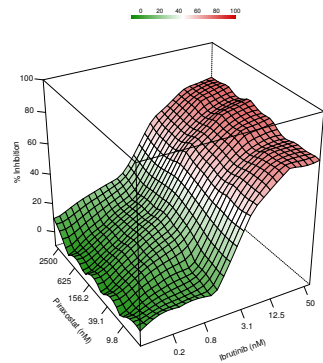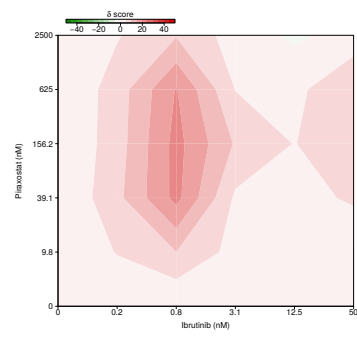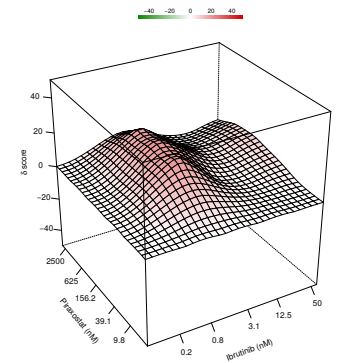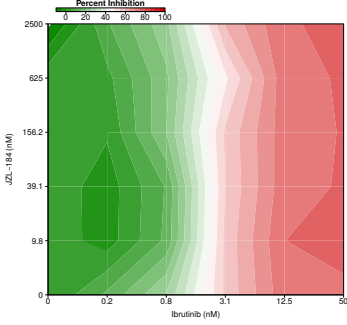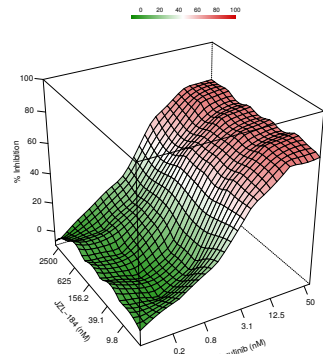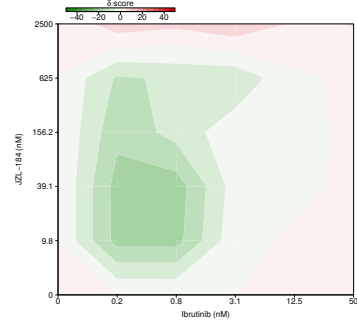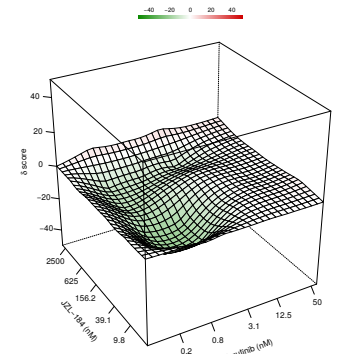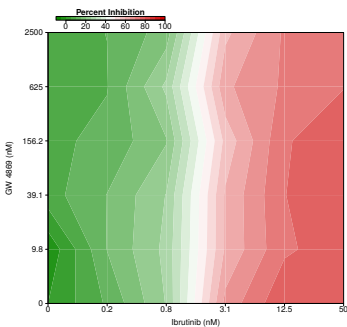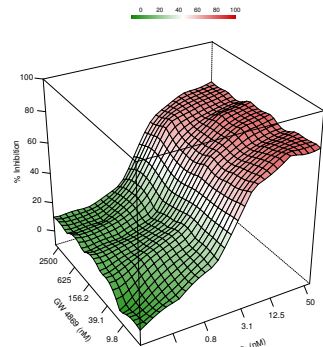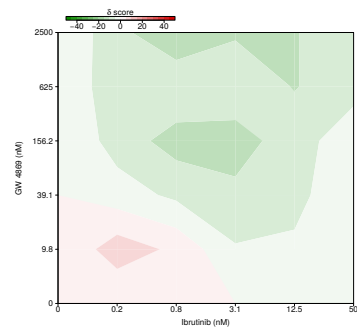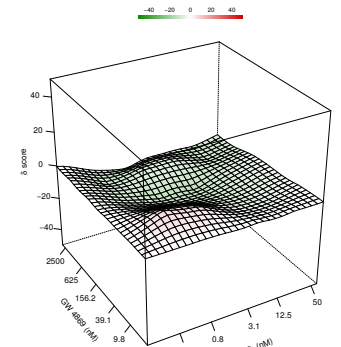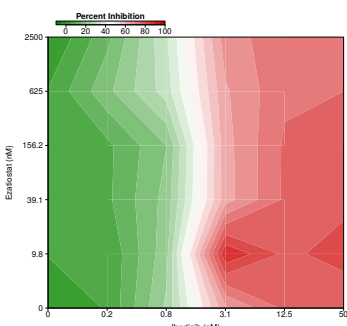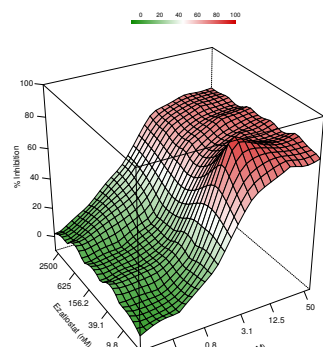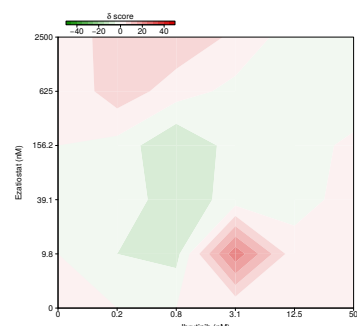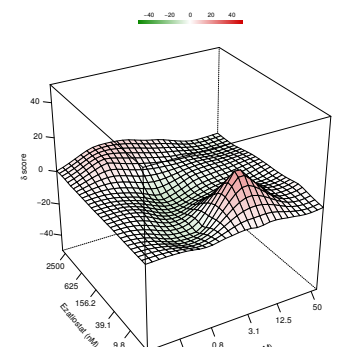

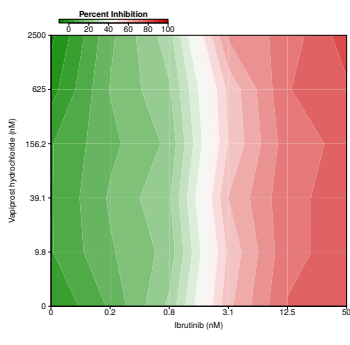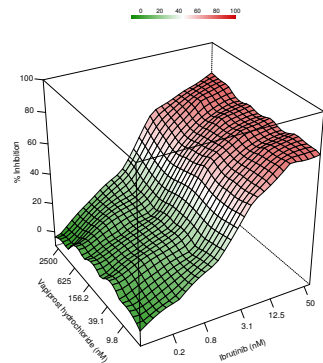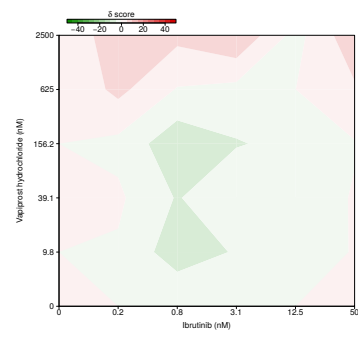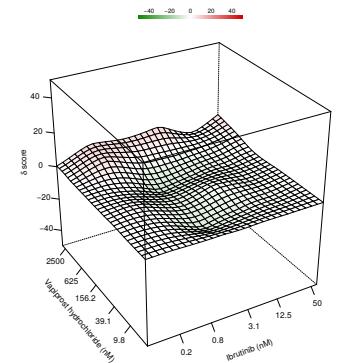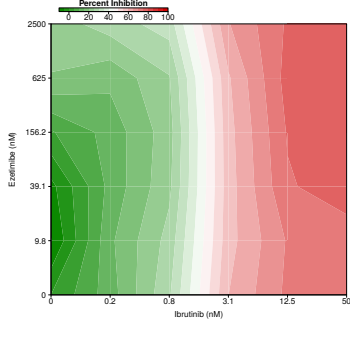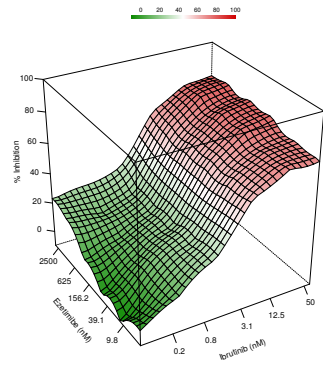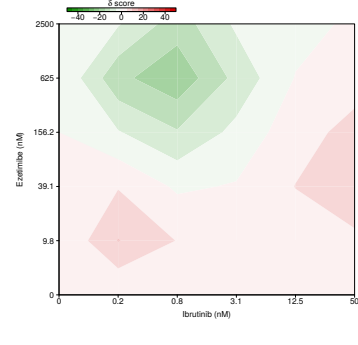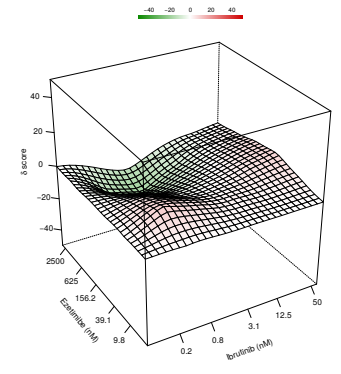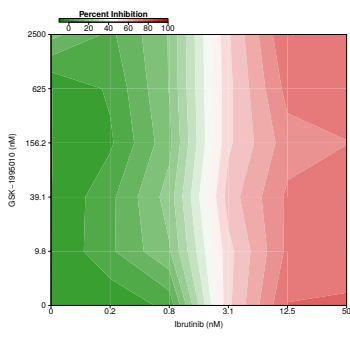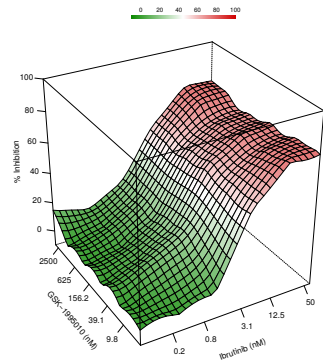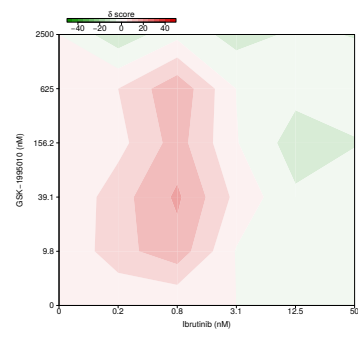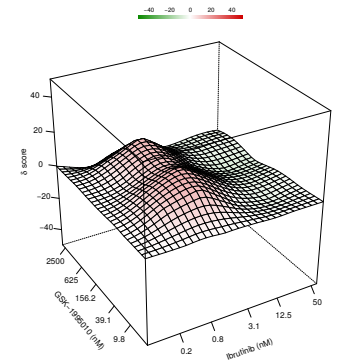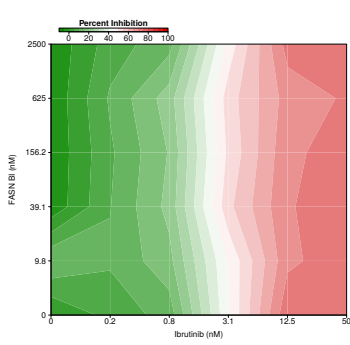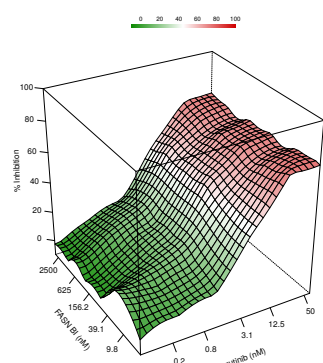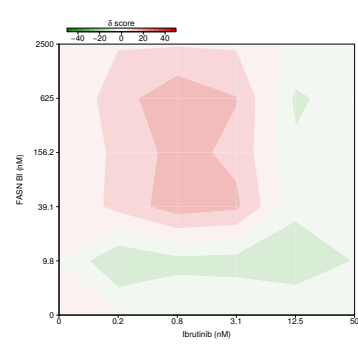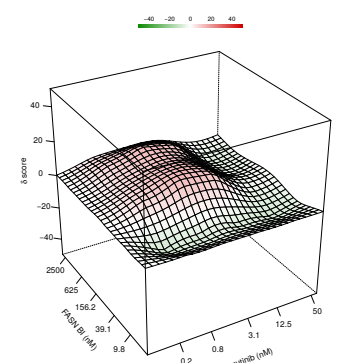

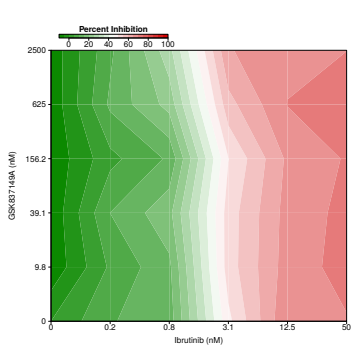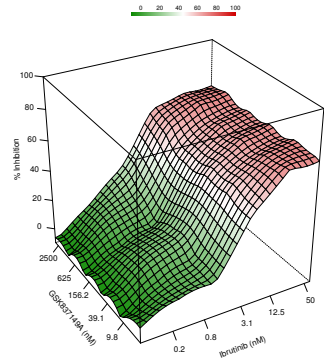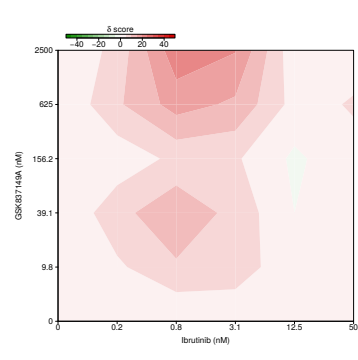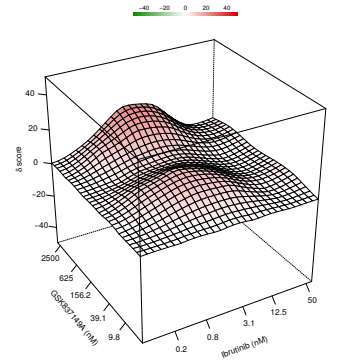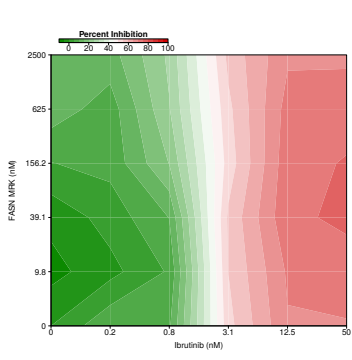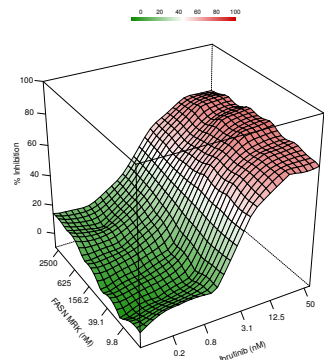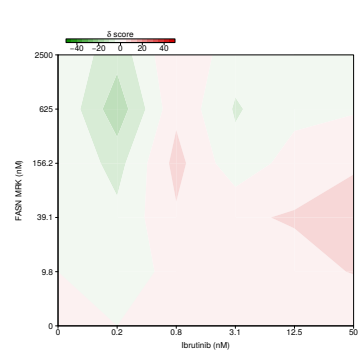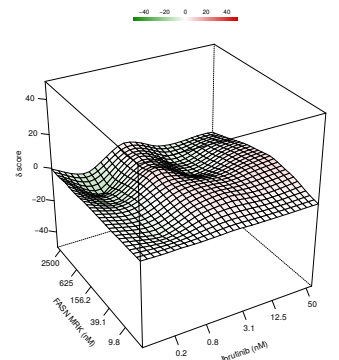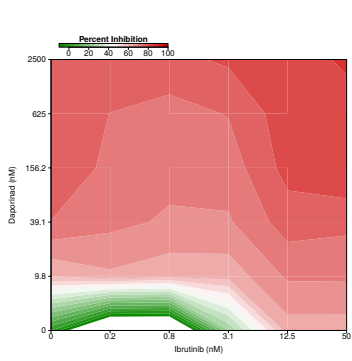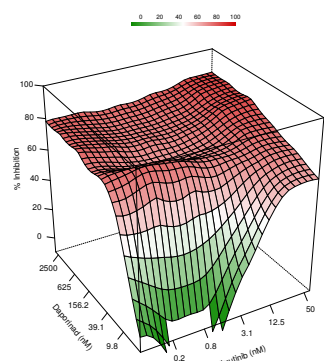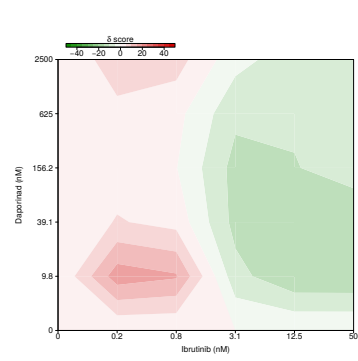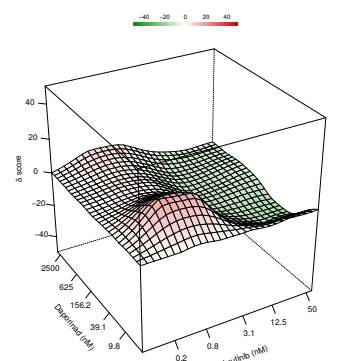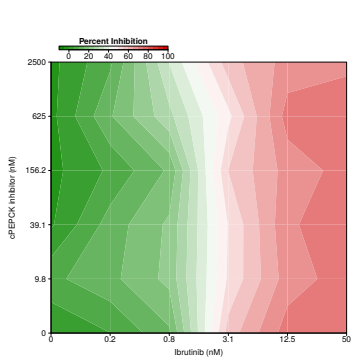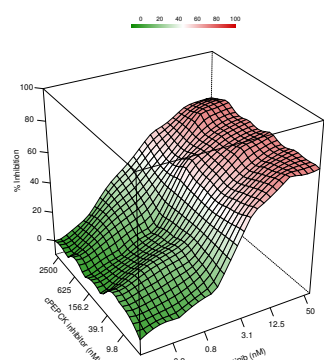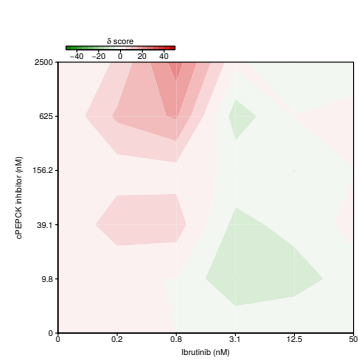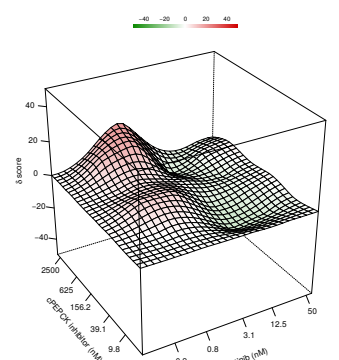





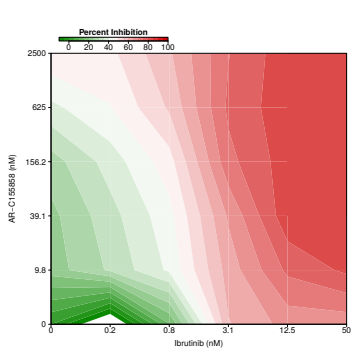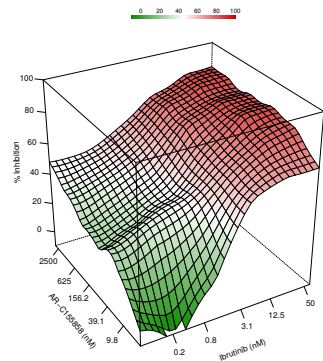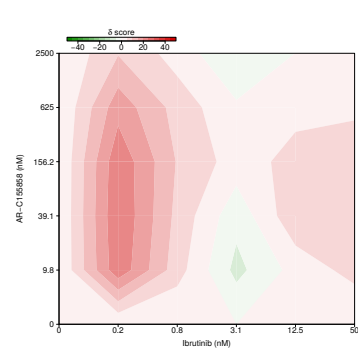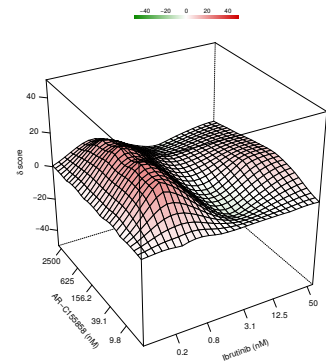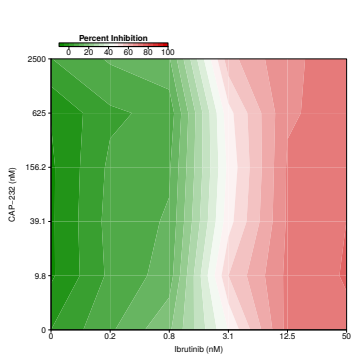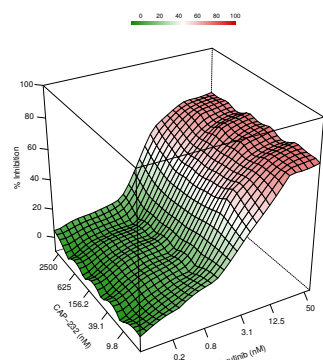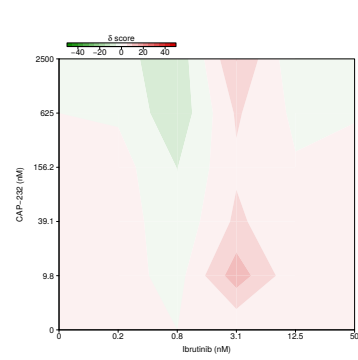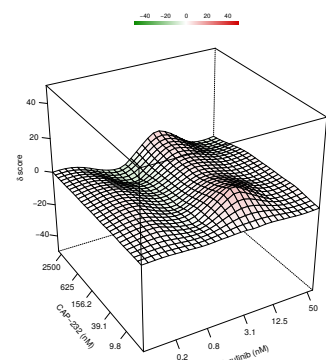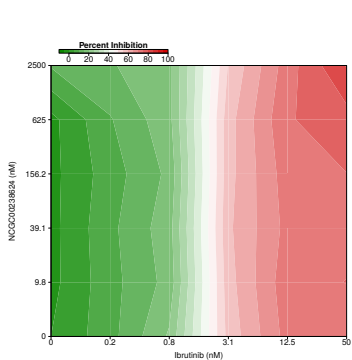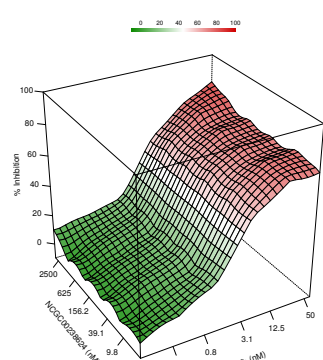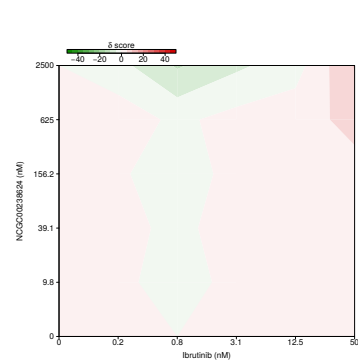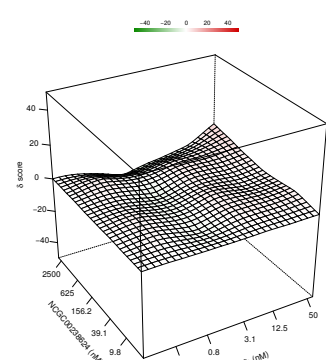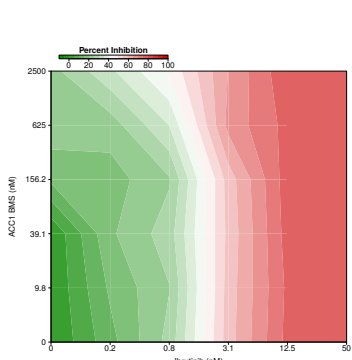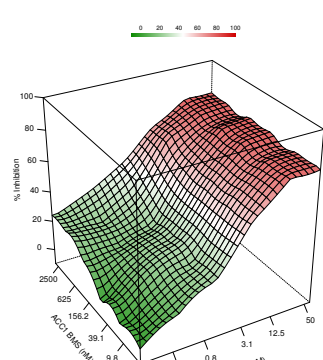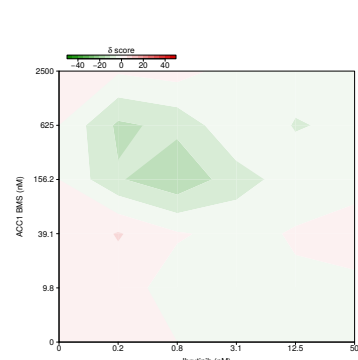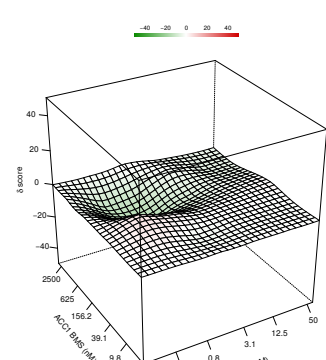

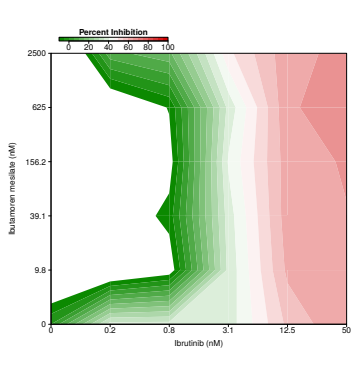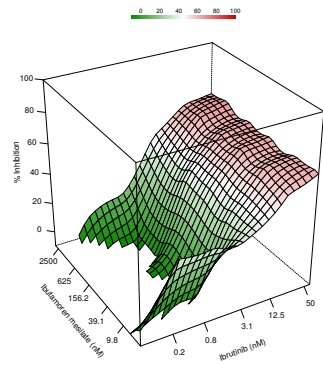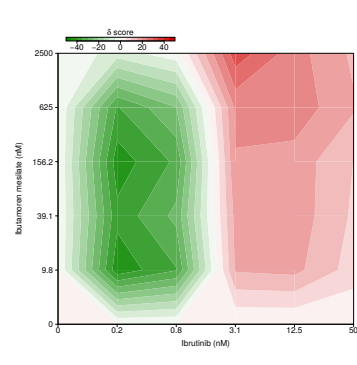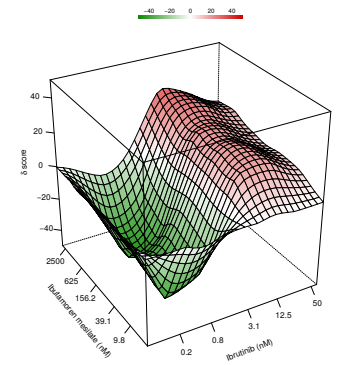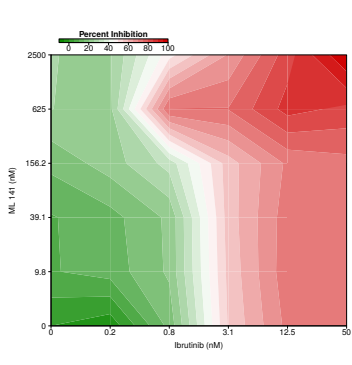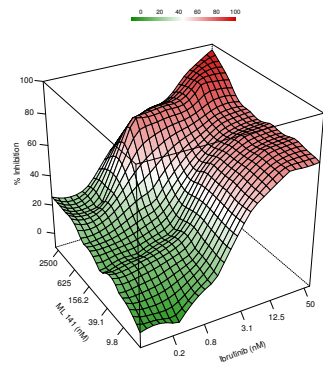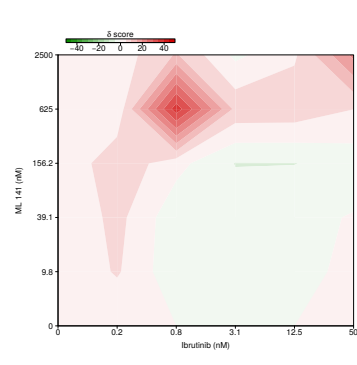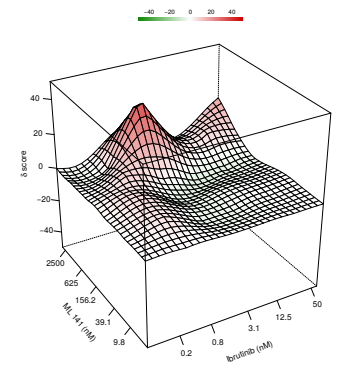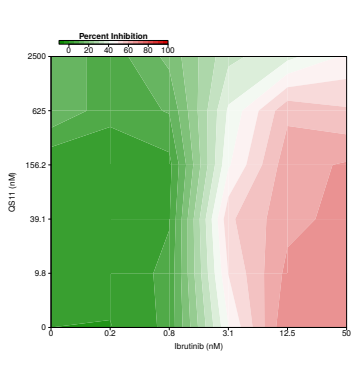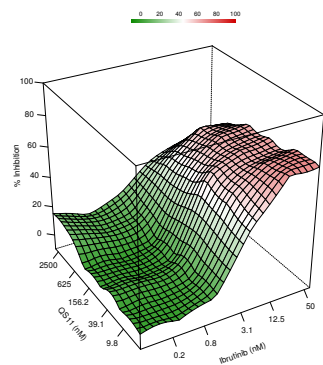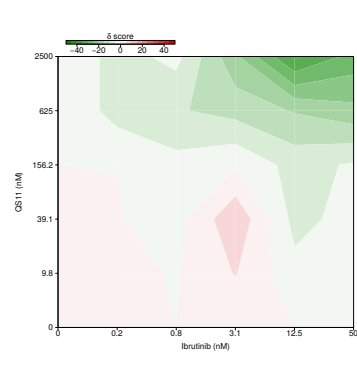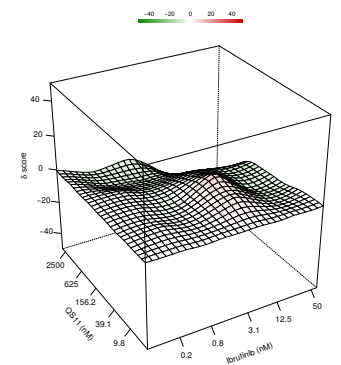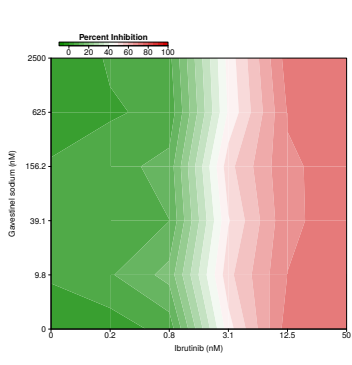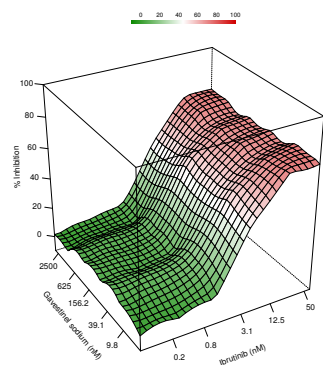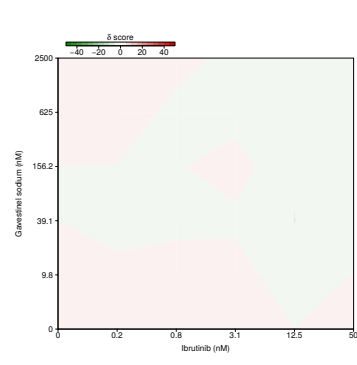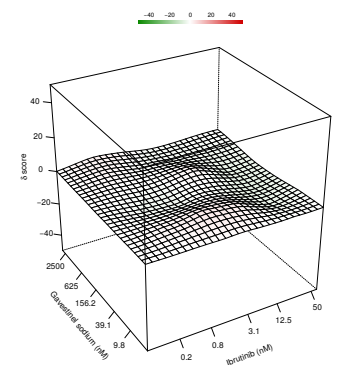



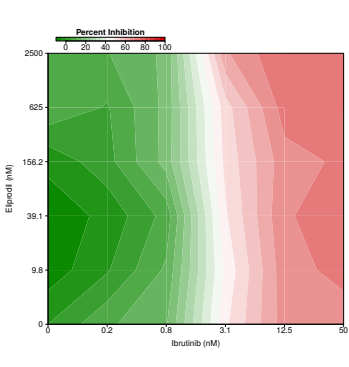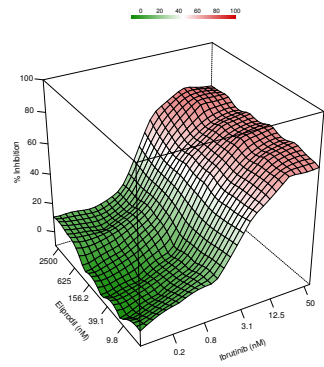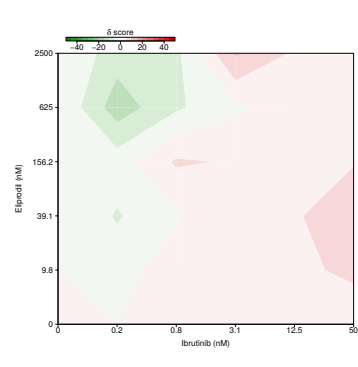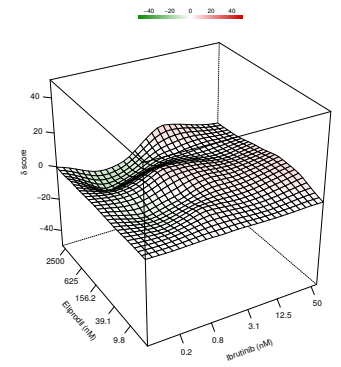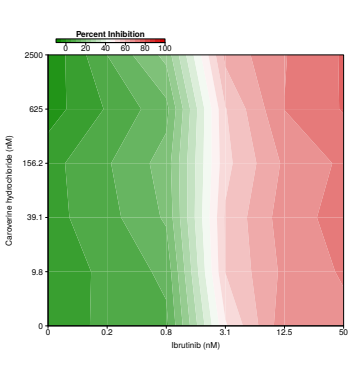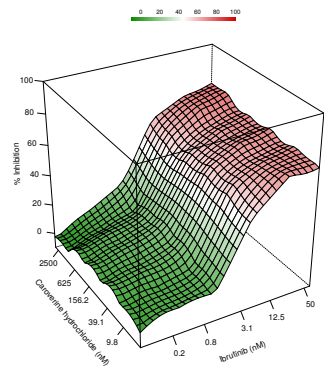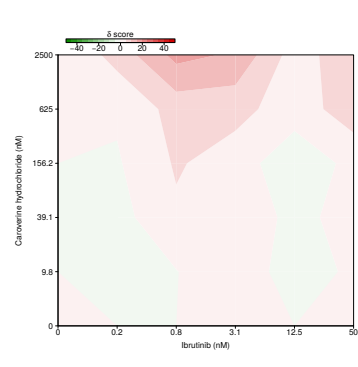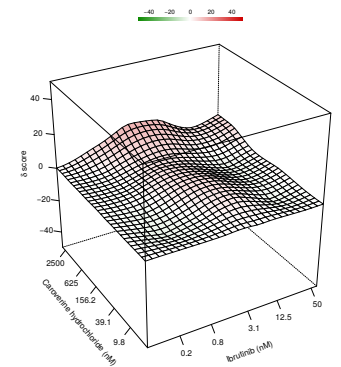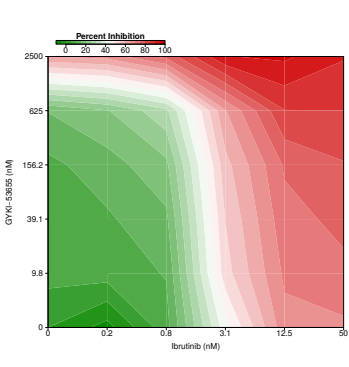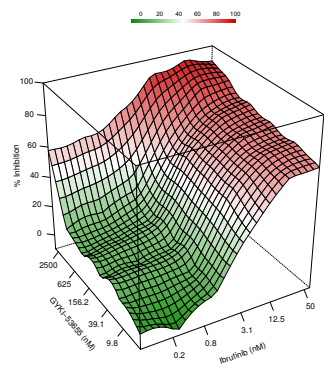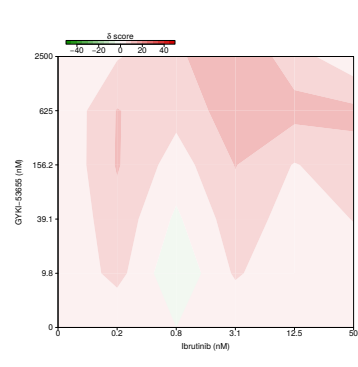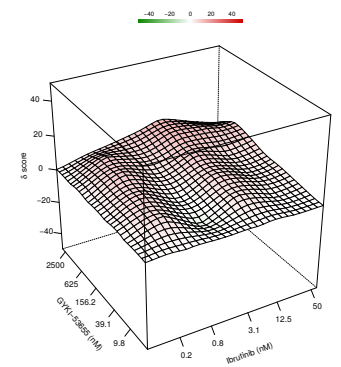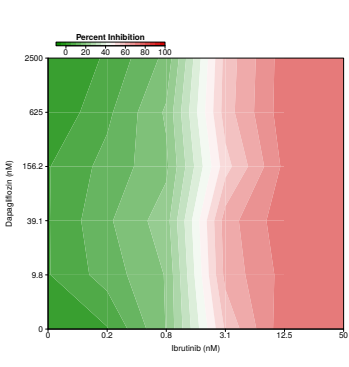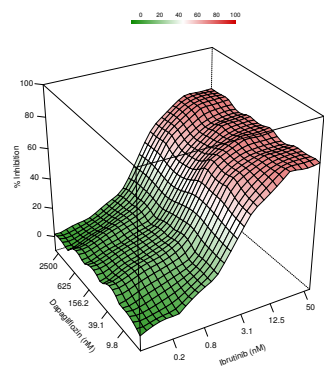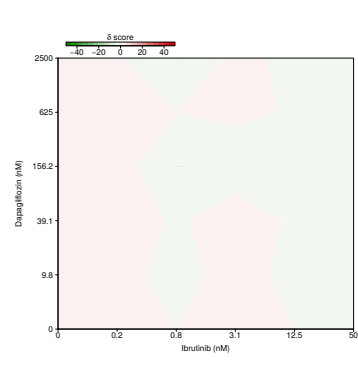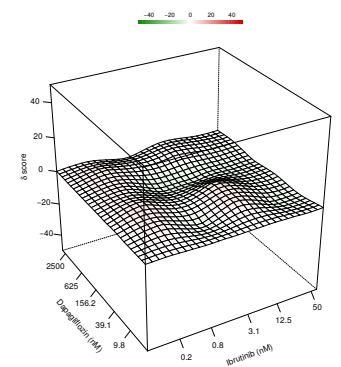

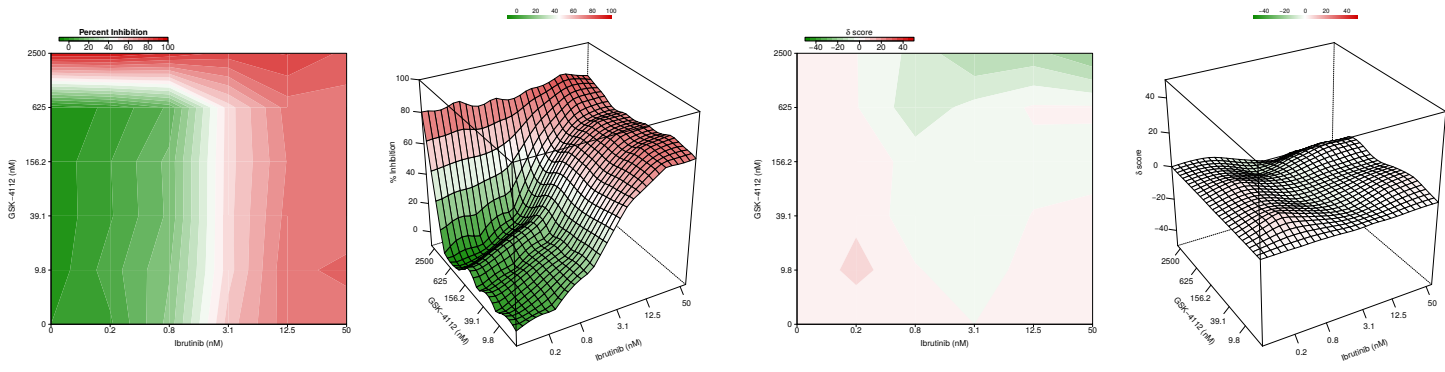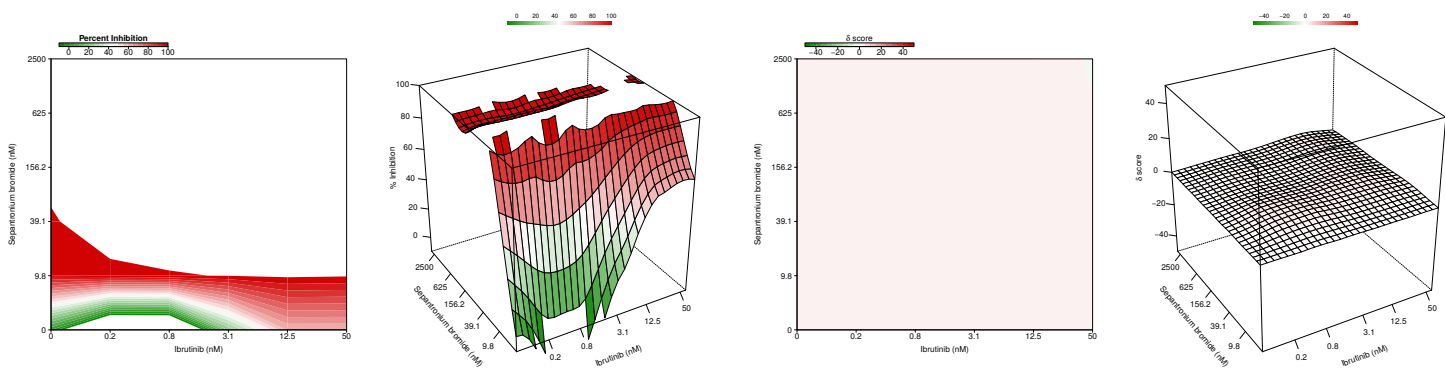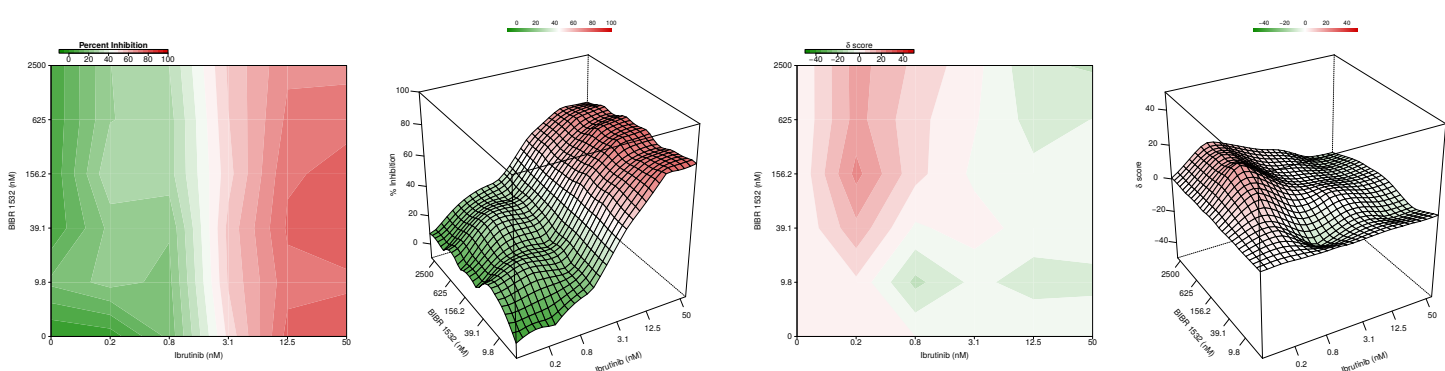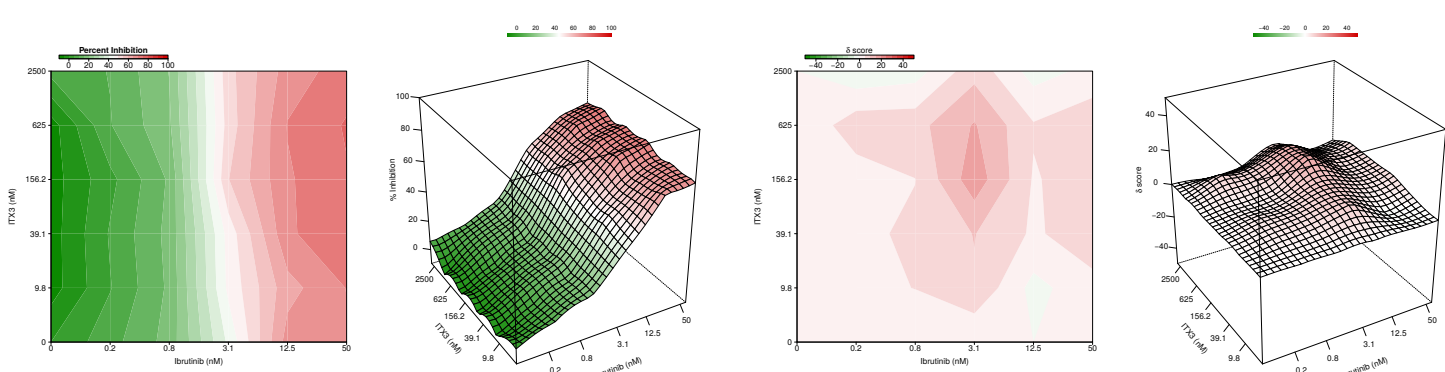



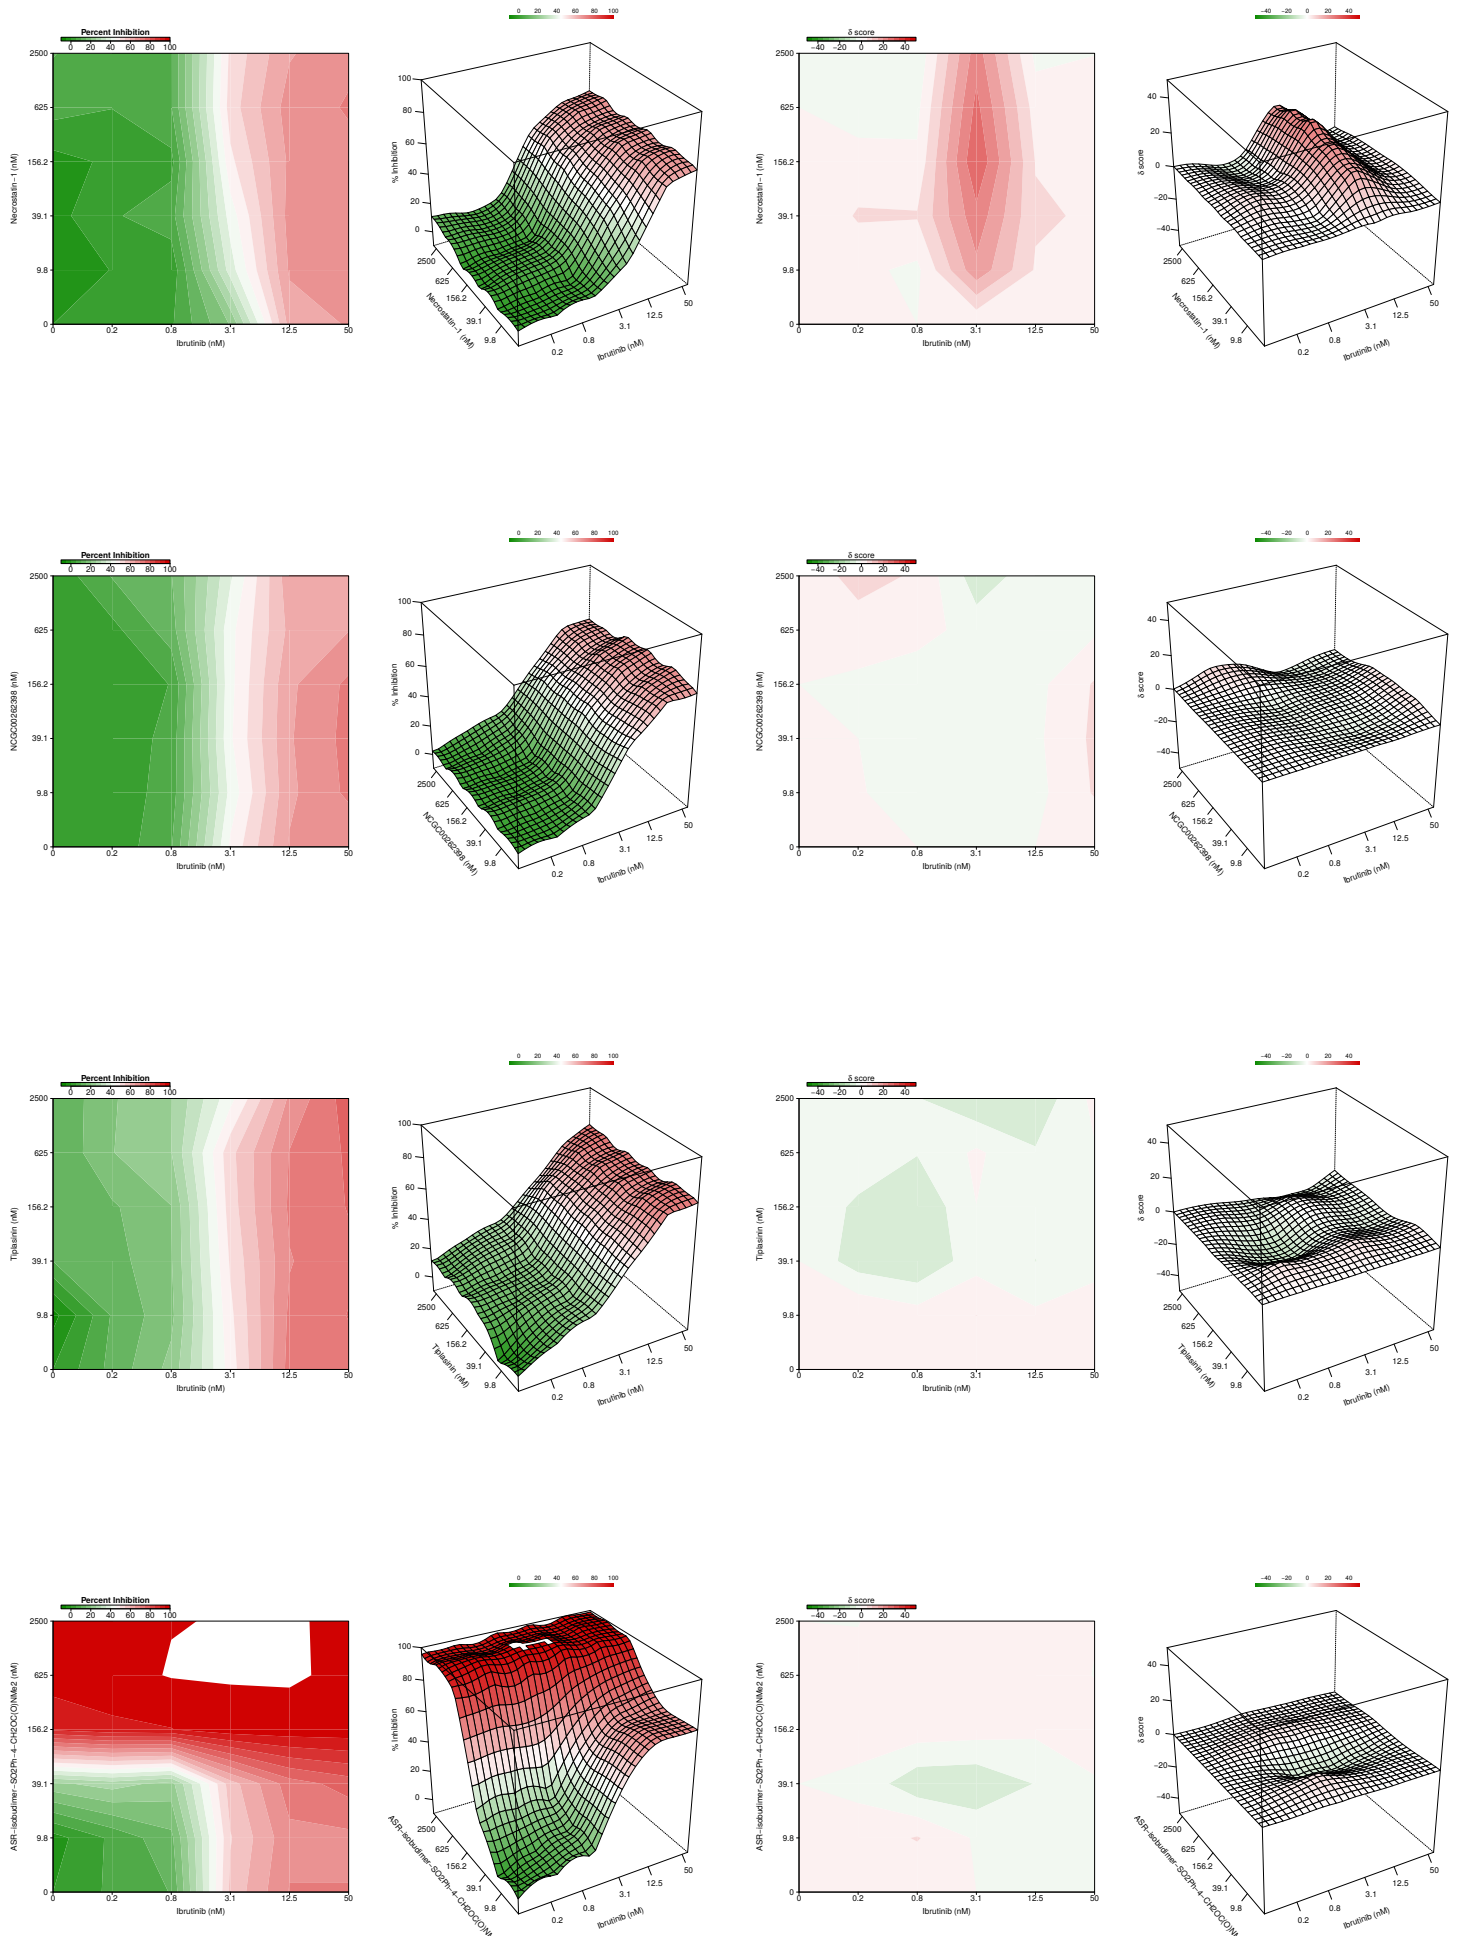

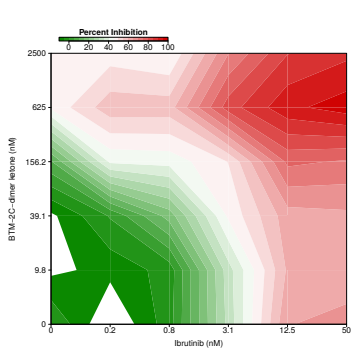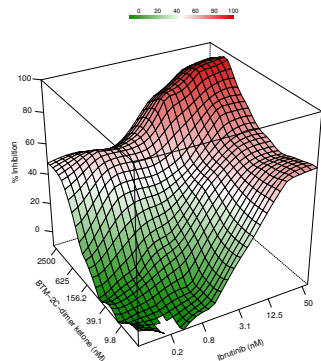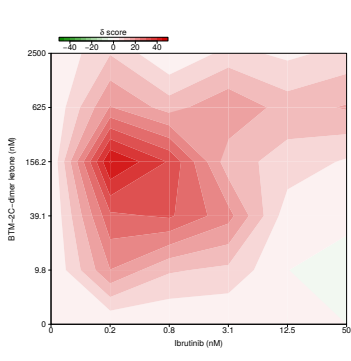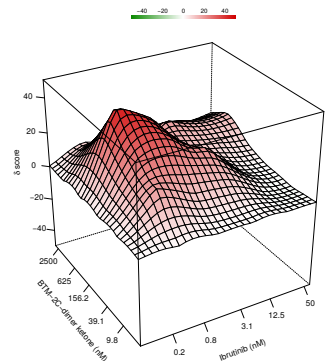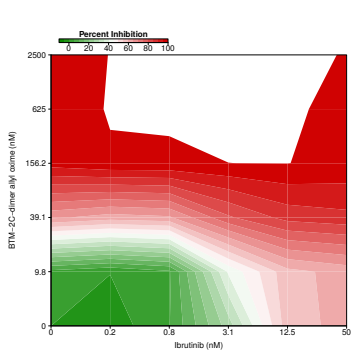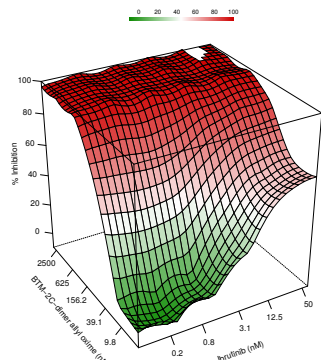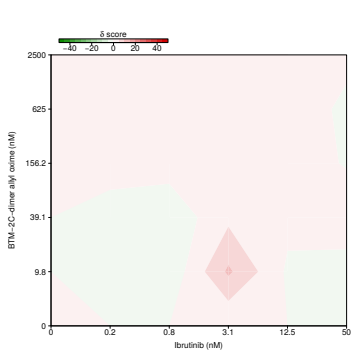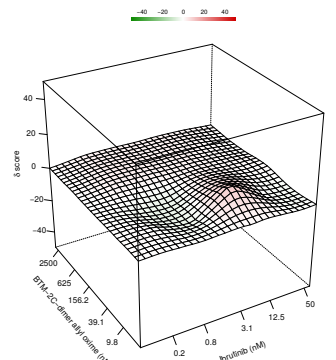

Supplement: mmc1.pdf [file mmc1.pdf]
